# Supplementary material for: Tn-seq profiling reveals that NodS of the beta-rhizobium Paraburkholderia phymatum is detrimental for nodulating soybean
Source: Research Square preprint supplement (doi:10.21203/rs.3.rs-4046625/v1), 2024-03-28
Supplement: Supplementary file 1 [file a4766ebef785610492ecf8de.xlsx]

## Sheet: Supplementary Table 3
Supplementary Table 3: List of the P. phymatum Tn mutant found in soybean nodules. UIC, unique insertion counts; UID, unique insertion density.
Locus tag	Start coord	End coord	Strand	Length	Locus type	Gene name	Description	UID Soybean	UIC Soybean
Bphy_7716	8566678	8567307	-	629	CDS	nodS	NodS family protein	0.0936508	59
Bphy_0081	91100	91300	-	200	CDS		hypothetical protein	0.00497512	1
Bphy_7477	8326826	8327080	-	254	CDS		eplicon_xref "NC_010627"	0.00392157	1
Bphy_7083	7923753	7924073	-	320	CDS		transcriptional activator FlhD	0.00311526	1
Bphy_6808	7605007	7605387	+	380	CDS		transposase IS4 family protein	0.00262467	1
Bphy_2791	3143554	3143937	+	383	CDS		hypothetical protein	0.00260417	1
Bphy_2478	2786938	2787354	+	416	CDS		NUDIX hydrolase	0.00239808	1
Bphy_1622	1843801	1844709	+	908	CDS		2-hydroxy-3-oxopropionate reductase	0.00220022	2
Bphy_7360	8217071	8217622	-	551	CDS		hypothetical protein	0.00181159	1
Bphy_6134	6863666	6864772	+	1106	CDS		transposase IS4 family protein	0.00180668	2
Bphy_2277	2552370	2553599	+	1229	CDS		hypothetical protein	0.00162602	2
Bphy_2532	2853619	2854239	-	620	CDS		cytochrome B561	0.00161031	1
Bphy_2715	3071128	3071751	-	623	CDS		HAD family hydrolase	0.00160256	1
Bphy_7294	8129636	8130916	+	1280	CDS		metallophosphoesterase	0.00156128	2
Bphy_6122	6851684	6852340	+	656	CDS		hypothetical protein	0.00152207	1
Bphy_3552	3975287	3976696	+	1409	CDS		transcriptional regulator	0.00141844	2
Bphy_7690	8540866	8541573	+	707	CDS		hypothetical protein	0.00141243	1
Bphy_3401	3813395	3814111	-	716	CDS		hypothetical protein	0.0013947	1
Bphy_5600	6243412	6244134	+	722	CDS		haloacid dehalogenase, type II	0.00138313	1
Bphy_6837	7638180	7638920	-	740	CDS		eplicon_xref "NC_010625"	0.00134953	1
Bphy_3835	4283170	4283922	-	752	CDS		PpiC-type peptidyl-prolyl cis-trans isomerase	0.00132802	1
Bphy_2175	2437704	2438462	+	758	CDS		fabG ,3-ketoacyl-(acyl-carrier-protein) reductase	0.00131752	1
Bphy_7494	8349194	8349961	-	767	CDS		extracellular solute-binding protein	0.00130208	1
Bphy_2943	3298166	3298948	+	782	CDS		flagellar biosynthetic protein FliR	0.00127714	1
Bphy_1789	2045021	2045812	-	791	CDS		ABC transporter-like protein	0.00126263	1
Bphy_6846	7647284	7648081	-	797	CDS		HpcH/HpaI aldolase	0.00125313	1
Bphy_4303	4794532	4795344	+	812	CDS		IclR family transcriptional regulator	0.00123001	1
Bphy_1769	2017481	2018317	+	836	CDS		IclR family transcriptional regulator	0.00119474	1
Bphy_7801	8655804	8656658	+	854	CDS		binding-protein-dependent transport systems inner membrane component	0.00116959	1
Bphy_7235	8070548	8071405	-	857	CDS		binding-protein-dependent transport systems inner membrane component	0.0011655	1
Bphy_1885	2142519	2143397	-	878	CDS		peptidase S49	0.00113766	1
Bphy_4446	4965826	4966731	+	905	CDS		binding-protein-dependent transport systems inner membrane component	0.00110375	1
Bphy_4356	4862900	4863811	-	911	CDS		prpB ,2-methylisocitrate lyase	0.00109649	1
Bphy_5537	6168876	6169802	-	926	CDS		exodeoxyribonuclease III Xth	0.00107875	1
Bphy_1233	1384481	1385410	-	929	CDS		ribokinase	0.00107527	1
Bphy_1292	1450628	1451557	+	929	CDS		LysR family transcriptional regulator	0.00107527	1
Bphy_0774	869630	870568	+	938	CDS		CobD/CbiB family protein	0.00106496	1
Bphy_3447	3847990	3848931	-	941	CDS		choline ABC transporter, periplasmic binding protein	0.00106157	1
Bphy_6431	7188446	7189393	-	947	CDS		hypothetical protein	0.00105485	1
Bphy_3531	3948655	3949611	-	956	CDS		fumarylacetoacetate (FAA) hydrolase	0.00104493	1
Bphy_5765	6445826	6446782	-	956	CDS		LysR family transcriptional regulator	0.00104493	1
Bphy_4935	5497862	5498821	-	959	CDS		AraC family transcriptional regulator	0.00104167	1
Bphy_1518	1712223	1714154	+	1931	CDS		thiamine biosynthesis protein ThiC	0.0010352	2
Bphy_0575	652688	653680	-	992	CDS		bifunctional riboflavin kinase/FMN adenylyltransferase	0.00100705	1
Bphy_1627	1849774	1850778	-	1004	CDS		sulfate ABC transporter inner membrane subunit CysW	0.000995025	1
Bphy_6442	7197265	7198275	-	1010	CDS		ornithine carbamoyltransferase	0.00098912	1
Bphy_6646	7416830	7417846	-	1016	CDS		rhodanese domain-containing protein	0.000983284	1
Bphy_6968	7795562	7796578	+	1016	CDS		hypothetical protein	0.000983284	1
Bphy_4624	5166725	5167759	+	1034	CDS		peptidase M14 carboxypeptidase A	0.000966184	1
Bphy_6734	7524281	7525315	-	1034	CDS		GDP-mannose 4,6-dehydratase	0.000966184	1
Bphy_0395	450784	451830	-	1046	CDS		aminoglycoside phosphotransferase	0.00095511	1
Bphy_1958	2200365	2202458	-	2093	CDS		excinuclease ABC subunit B	0.00095511	2
Bphy_4822	5363364	5364437	+	1073	CDS		beta-lactamase domain-containing protein	0.000931099	1
Bphy_7236	8071417	8072499	-	1082	CDS		ABC sulfate ester transporter, periplasmic ligand binding protein	0.000923361	1
Bphy_4959	5524928	5526034	-	1106	CDS		transposase IS4 family protein	0.000903342	1
Bphy_4570	5110215	5111363	+	1148	CDS		hypothetical protein	0.000870322	1
Bphy_3211	3602153	3603328	-	1175	CDS		porin	0.00085034	1
Bphy_0970	1084301	1085482	+	1181	CDS		acetyl-CoA acetyltransferase	0.000846024	1
Bphy_4551	5091220	5092413	+	1193	CDS		putative alcohol dehydrogenase	0.000837521	1
Bphy_0588	666197	667396	+	1199	CDS		extracellular ligand-binding receptor	0.000833333	1
Bphy_1761	2011206	2012408	+	1202	CDS		Rh family protein/ammonium transporter	0.000831255	1
Bphy_0513	584456	585670	-	1214	CDS		cyclopropane-fatty-acyl-phospholipid synthase	0.000823045	1
Bphy_4465	4985177	4986397	+	1220	CDS		extracellular ligand-binding receptor	0.000819001	1
Bphy_7567	8415493	8416734	+	1241	CDS		hypothetical protein	0.000805153	1
Bphy_7595	8451175	8452416	-	1241	CDS		integrase family protein	0.000805153	1
Bphy_2449	2748292	2749539	-	1247	CDS		glyA ,serine hydroxymethyltransferase	0.000801282	1
Bphy_3279	3685416	3686672	+	1256	CDS		hypothetical protein	0.000795545	1
Bphy_7266	8099770	8101038	+	1268	CDS		diaminobutyrate--2-oxoglutarate aminotransferase	0.000788022	1
Bphy_1228	1377127	1378398	-	1271	CDS		hypothetical protein	0.000786164	1
Bphy_0174	193893	195182	-	1289	CDS		hypothetical protein	0.000775194	1
Bphy_5250	5856663	5857955	-	1292	CDS		glycosyl transferase group 1	0.000773395	1
Bphy_5121	5707143	5708444	-	1301	CDS		xanthine/uracil/vitamin C permease	0.000768049	1
Bphy_2693	3046143	3047447	+	1304	CDS		phenylacetate-CoA ligase	0.000766284	1
Bphy_0663	748289	749596	-	1307	CDS		general substrate transporter	0.000764526	1
Bphy_3624	4053959	4055311	+	1352	CDS		metallophosphoesterase	0.000739098	1
Bphy_0412	470505	471875	-	1370	CDS		(dimethylallyl)adenosine tRNA methylthiotransferase	0.000729395	1
Bphy_6849	7650116	7651498	-	1382	CDS		MmgE/PrpD family protein	0.000723066	1
Bphy_0787	882947	884341	+	1394	CDS		sigma-54 dependent trancsriptional regulator	0.000716846	1
Bphy_1057	1186810	1188207	+	1397	CDS		undecaprenyl-phosphate glucose phosphotransferase	0.000715308	1
Bphy_0230	254787	256241	-	1454	CDS		Mg chelatase subunit ChlI	0.000687285	1
Bphy_4001	4453263	4454726	-	1463	CDS		catalase	0.00068306	1
Bphy_6831	7631740	7633221	+	1481	CDS		aldehyde dehydrogenase	0.000674764	1
Bphy_3567	3991327	3992820	-	1493	CDS		aldehyde dehydrogenase	0.000669344	1
Bphy_7729	8581805	8583298	+	1493	CDS	nifE	nitrogenase MoFe cofactor biosynthesis protein NifE	0.000669344	1
Bphy_7464	8316814	8318325	-	1511	CDS		RNA-directed DNA polymerase	0.000661376	1
Bphy_4832	5374162	5375676	+	1514	CDS		FAD-dependent pyridine nucleotide-disulphide oxidoreductase	0.000660066	1
Bphy_2787	3134984	3136501	-	1517	CDS		gltD ,glutamate synthase subunit beta	0.000658762	1
RNA_64	5650753	5652276	+	1523	RNA	Bphy_R0018	16S ribosomal RNA	0.000656168	1
RNA_65	4190616	4192139	-	1523	RNA	Bphy_R0017	16S ribosomal RNA	0.000656168	1
RNA_67	3206152	3207675	-	1523	RNA	Bphy_R0015	16S ribosomal RNA	0.000656168	1
RNA_70	3038846	3040369	-	1523	RNA	Bphy_R0012	16S ribosomal RNA	0.000656168	1
RNA_74	2221793	2223316	-	1523	RNA	Bphy_R0008	16S ribosomal RNA	0.000656168	1
RNA_77	1348921	1350444	-	1523	RNA	Bphy_R0005	16S ribosomal RNA	0.000656168	1
Bphy_3639	4070024	4071571	-	1547	CDS		hypothetical protein	0.000645995	1
Bphy_6720	7505774	7507330	+	1556	CDS		hypothetical protein	0.000642261	1
Bphy_1236	1387667	1389229	-	1562	CDS		ABC transporter-like protein	0.000639795	1
Bphy_4663	5210889	5212460	-	1571	CDS		major facilitator transporter	0.000636132	1
Bphy_4852	5398751	5400322	+	1571	CDS		transcriptional regulator	0.000636132	1
Bphy_2726	3080892	3082484	-	1592	CDS		amino acid permease-associated protein	0.000627746	1
Bphy_3656	4087502	4089094	-	1592	CDS		alkyl hydroperoxide reductase, F subunit	0.000627746	1
Bphy_5307	5920546	5922138	+	1592	CDS		EmrB/QacA family drug resistance transporter	0.000627746	1
Bphy_5772	6453590	6455221	+	1631	CDS		amino acid permease-associated region	0.000612745	1
Bphy_2685	3029549	3031222	-	1673	CDS		Long-chain-fatty-acid--CoA ligase	0.000597372	1
Bphy_2235	2507220	2508899	-	1679	CDS		sulfite reductase	0.000595238	1
Bphy_2397	2692823	2694541	-	1718	CDS		sulfate transporter	0.000581734	1
Bphy_3310	3723884	3725602	+	1718	CDS		choline dehydrogenase	0.000581734	1
Bphy_0385	436100	437887	+	1787	CDS		acyl-CoA dehydrogenase domain-containing protein	0.000559284	1
Bphy_2077	2326942	2328735	-	1793	CDS		lipid A ABC exporter ATPase/inner membrane subunits MsbA	0.000557414	1
Bphy_5430	6052592	6054403	+	1811	CDS		diguanylate cyclase	0.000551876	1
Bphy_5449	6073927	6075795	-	1868	CDS		ABC transporter related	0.000535045	1
Bphy_1229	1378540	1380462	-	1922	CDS		putative serine protein kinase PrkA	0.000520021	1
Bphy_7328	8180767	8182749	-	1982	CDS		band 7 protein	0.000504286	1
Bphy_0890	995430	997493	+	2063	CDS		polyphosphate kinase	0.000484496	1
Bphy_7110	7947998	7950082	-	2084	CDS		diguanylate cyclase/phosphodiesterase	0.000479616	1
Bphy_2093	2350473	2352656	+	2183	CDS		glycoside hydrolase 15-like protein	0.000457875	1
Bphy_6966	7791302	7793488	+	2186	CDS		hypothetical protein	0.000457247	1
Bphy_0232	258183	260423	+	2240	CDS		hypothetical protein	0.000446229	1
Bphy_3134	3508144	3510462	-	2318	CDS		diguanylate cyclase/phosphodiesterase with PAS/PAC and GAF sensor(s)	0.00043122	1
Bphy_4068	4544467	4546839	+	2372	CDS		salicylyl-CoA 5-hydroxylase	0.000421408	1
Bphy_1750	1999163	2001583	+	2420	CDS		hypothetical protein	0.000413052	1
Bphy_3899	4349793	4352258	-	2465	CDS		peptidoglycan glycosyltransferase	0.000405515	1
Bphy_0938	1041221	1043818	+	2597	CDS		ATP-dependent chaperone ClpB	0.000384911	1
Bphy_7756	8603720	8609149	-	5429	CDS		PAS sensor protein	0.000368324	2
RNA_63	5652890	5655771	+	2881	RNA	Bphy_R0019	23S ribosomal RNA	0.000346981	1
RNA_66	4187121	4190002	-	2881	RNA	Bphy_R0016	23S ribosomal RNA	0.000346981	1
RNA_71	3035350	3038231	-	2881	RNA	Bphy_R0011	23S ribosomal RNA	0.000346981	1
RNA_75	2218298	2221179	-	2881	RNA	Bphy_R0007	23S ribosomal RNA	0.000346981	1
Bphy_0391	444224	447346	+	3122	CDS		PAS/PAC sensor(s)-containing diguanylate cyclase/phosphodiesterase	0.000320205	1
Bphy_7463	8316090	8319646	-	3556	CDS		eplicon_xref "NC_010627"	0.000281136	1
Bphy_2868	3218513	3222115	+	3602	CDS		indolepyruvate ferredoxin oxidoreductase	0.000277546	1
Bphy_0246	287759	292492	+	4733	CDS		hypothetical protein	0.000211238	1
Bphy_4291	4773210	4782449	+	9239	CDS		filamentous haemagglutinin outer membrane protein	0.000108225	1
Bphy_4338	4835853	4845233	-	9380	CDS		YadA domain-containing protein	0.000106598	1
Bphy_0001	362	1918	+	1556	CDS	dnaA	chromosomal replication initiation protein	0	0
Bphy_0002	2175	3278	+	1103	CDS		DNA polymerase III subunit beta	0	0
Bphy_0003	3392	5863	+	2471	CDS		gyrB ,DNA gyrase subunit B	0	0
Bphy_0004	5956	6237	-	281	CDS		hypothetical protein	0	0
Bphy_0005	6240	7009	-	769	CDS		eplicon_xref "NC_010622"	0	0
Bphy_0006	7331	8734	+	1403	CDS		ethanolamine transporter	0	0
Bphy_0007	8816	10210	+	1394	CDS		ethanolamine ammonia lyase large subunit	0	0
Bphy_0008	10207	11001	+	794	CDS		ethanolamine ammonia-lyase small subunit	0	0
Bphy_0009	11042	11434	-	392	CDS		hypothetical protein	0	0
Bphy_0010	11514	13034	-	1520	CDS		aldehyde dehydrogenase	0	0
Bphy_0011	13381	14397	+	1016	CDS		AraC family transcriptional regulator	0	0
Bphy_0012	14834	15019	+	185	CDS		hypothetical protein	0	0
Bphy_0013	15034	16425	+	1391	CDS		ATP-dependent RNA helicase DbpA	0	0
Bphy_0014	16752	17906	+	1154	CDS		putative aminotransferase	0	0
Bphy_0015	17921	18763	+	842	CDS		Nitrilase/cyanide hydratase and apolipoprotein N-acyltransferase	0	0
Bphy_0016	18797	19588	+	791	CDS		extracellular solute-binding protein	0	0
Bphy_0017	19749	20486	+	737	CDS		putative transmembrane anti-sigma factor	0	0
Bphy_0018	20605	21123	+	518	CDS		ECF subfamily RNA polymerase sigma-24 factor	0	0
Bphy_0019	21120	21953	+	833	CDS		putative transmembrane anti-sigma factor	0	0
Bphy_0020	22125	22394	+	269	CDS		hypothetical protein	0	0
Bphy_0021	22697	23020	+	323	CDS		eplicon_xref "NC_010622"	0	0
Bphy_0022	23411	25324	+	1913	CDS		type VI secretion protein	0	0
Bphy_0023	25363	28020	+	2657	CDS		type VI secretion system Vgr family protein	0	0
Bphy_0024	28054	28971	+	917	CDS		hypothetical protein	0	0
Bphy_0025	29288	29647	+	359	CDS		hypothetical protein	0	0
Bphy_0026	29667	30656	+	989	CDS		hypothetical protein	0	0
Bphy_0027	31178	31582	+	404	CDS		thioesterase superfamily protein	0	0
Bphy_0028	31634	32500	+	866	CDS		patatin	0	0
Bphy_0029	32555	33568	-	1013	CDS		D-isomer specific 2-hydroxyacid dehydrogenase	0	0
Bphy_0030	33920	35776	+	1856	CDS		phosphoenolpyruvate carboxykinase	0	0
Bphy_0031	36108	37196	+	1088	CDS		LysR family transcriptional regulator	0	0
Bphy_0032	37341	40067	-	2726	CDS		DNA topoisomerase III	0	0
Bphy_0033	40305	40682	-	377	CDS		thioredoxin domain-containing protein	0	0
Bphy_0034	40737	41906	-	1169	CDS		DNA protecting protein DprA	0	0
Bphy_0035	42162	42665	+	503	CDS	def	peptide deformylase	0	0
Bphy_0036	42691	43674	+	983	CDS		fmt ,methionyl-tRNA formyltransferase	0	0
Bphy_0037	43774	44418	+	644	CDS		lysine exporter protein LysE/YggA	0	0
Bphy_0038	44522	45379	+	857	CDS		M48 family peptidase	0	0
Bphy_0039	45662	47023	+	1361	CDS		sun protein	0	0
Bphy_0040	47020	47610	+	590	CDS		hypothetical protein	0	0
Bphy_0041	47612	50023	+	2411	CDS		integral membrane sensor signal transduction histidine kinase	0	0
Bphy_0042	50024	50713	+	689	CDS		two component Fis family transcriptional regulator	0	0
Bphy_0043	51253	51984	+	731	CDS		exsB protein	0	0
Bphy_0044	52054	52686	+	632	CDS		radical SAM domain-containing protein	0	0
Bphy_0045	52693	53139	+	446	CDS		queuosine biosynthesis protein QueD	0	0
Bphy_0046	53327	54109	+	782	CDS		2-dehydro-3-deoxyglucarate aldolase	0	0
Bphy_0047	54106	54816	+	710	CDS		Sel1 domain-containing protein	0	0
Bphy_0048	54875	56023	-	1148	CDS		rod shape-determining protein RodA	0	0
Bphy_0049	56034	58436	-	2402	CDS		penicillin-binding protein 2	0	0
Bphy_0050	58558	59070	-	512	CDS		rod shape-determining protein MreD	0	0
Bphy_0051	59067	60170	-	1103	CDS		rod shape-determining protein MreC	0	0
Bphy_0052	60289	61332	-	1043	CDS		rod shape-determining protein MreB	0	0
Bphy_0053	61712	62011	+	299	CDS		gatC ,aspartyl/glutamyl-tRNA amidotransferase subunit C	0	0
Bphy_0054	62165	63658	+	1493	CDS		gatA ,aspartyl/glutamyl-tRNA amidotransferase subunit A	0	0
Bphy_0055	63660	65135	+	1475	CDS		gatB ,aspartyl/glutamyl-tRNA amidotransferase subunit B	0	0
Bphy_0056	65270	66106	+	836	CDS		hypothetical protein	0	0
Bphy_0057	66149	66928	+	779	CDS		exodeoxyribonuclease III Xth	0	0
Bphy_0058	66953	68167	-	1214	CDS		peptidase M48 Ste24p	0	0
Bphy_0059	68167	69561	-	1394	CDS		major facilitator transporter	0	0
Bphy_0060	69575	70183	-	608	CDS		methionine biosynthesis protein MetW	0	0
Bphy_0061	70180	71325	-	1145	CDS		metX ,homoserine O-acetyltransferase	0	0
Bphy_0062	71569	72267	-	698	CDS		slmA ,nucleoid occlusion protein	0	0
Bphy_0063	72304	73062	-	758	CDS		me "hypothetical protein (pseudogene) ,hypothetical protein (pseudogene)"	0	0
Bphy_0063	72304	73062	-	758	CDS		me "hypothetical protein (pseudogene)"	0	0
Bphy_0064	73262	74161	-	899	CDS		acetylglutamate kinase	0	0
Bphy_0065	74476	74751	+	275	CDS		hypothetical protein	0	0
Bphy_0066	74789	76426	-	1637	CDS		TPR repeat-containing protein	0	0
Bphy_0067	76529	77833	+	1304	CDS		integral membrane sensor signal transduction histidine kinase	0	0
Bphy_0068	77830	78372	+	542	CDS		two component Fis family transcriptional regulator	0	0
Bphy_0069	78455	79798	-	1343	CDS		hslU ,ATP-dependent protease ATP-binding subunit HslU	0	0
Bphy_0070	79808	80344	-	536	CDS		ATP-dependent protease peptidase subunit	0	0
Bphy_0071	80718	81137	-	419	CDS		TraR/DksA family transcriptional regulator	0	0
Bphy_0072	81752	82840	-	1088	CDS		cobalamin synthesis protein P47K	0	0
Bphy_0073	83006	84208	-	1202	CDS		PUA domain-containing protein	0	0
Bphy_0074	84294	85217	-	923	CDS		xerC ,site-specific tyrosine recombinase XerC	0	0
Bphy_0075	85228	85947	-	719	CDS		hypothetical protein	0	0
Bphy_0076	86034	86894	-	860	CDS	dapF	diaminopimelate epimerase	0	0
Bphy_0077	86949	87833	-	884	CDS		lipid A biosynthesis lauroyl acyltransferase	0	0
Bphy_0078	88106	89293	+	1187	CDS		S-adenosylmethionine synthetase	0	0
Bphy_0079	89507	89803	-	296	CDS		hypothetical protein	0	0
Bphy_0080	90294	91055	+	761	CDS		phytanoyl-CoA dioxygenase	0	0
Bphy_0082	91610	92653	+	1043	CDS		aldo/keto reductase	0	0
Bphy_0083	92765	92947	-	182	CDS		hypothetical protein	0	0
Bphy_0084	93217	94488	-	1271	CDS		major facilitator transporter	0	0
Bphy_0085	94454	95173	-	719	CDS		hypothetical protein	0	0
Bphy_0086	95551	95763	+	212	CDS		hypothetical protein	0	0
Bphy_0087	95889	96911	+	1022	CDS		serine/threonine protein kinase	0	0
Bphy_0088	97214	97378	+	164	CDS		hypothetical protein	0	0
Bphy_0089	97489	98517	-	1028	CDS		hypothetical protein	0	0
Bphy_0090	98490	99071	-	581	CDS		carbon monoxide dehydrogenase subunit G	0	0
Bphy_0091	99062	100297	-	1235	CDS		VWA containing CoxE family protein	0	0
Bphy_0092	100303	101193	-	890	CDS		ATPase	0	0
Bphy_0093	101327	102124	-	797	CDS		carbon-monoxide dehydrogenase	0	0
Bphy_0094	102137	104524	-	2387	CDS		acylmolybdopterin binding aldehyde oxidase and xanthine dehydrogenase protein	0	0
Bphy_0095	104536	105036	-	500	CDS		2Fe-2S iron-sulfur cluster binding domain-containing protein	0	0
Bphy_0096	105421	106821	-	1400	CDS		amino acid permease-associated protein	0	0
Bphy_0097	106959	107615	-	656	CDS		two component LuxR family transcriptional regulator	0	0
Bphy_0098	107677	108543	-	866	CDS		histidine kinase	0	0
Bphy_0099	109090	109860	-	770	CDS		oxidoreductase FAD-binding subunit	0	0
Bphy_0100	110381	111022	-	641	CDS		lysine exporter protein LysE/YggA	0	0
Bphy_0101	111526	111951	+	425	CDS		eplicon_xref "NC_010622"	0	0
Bphy_0102	111967	112764	-	797	CDS		endonuclease/exonuclease/phosphatase	0	0
Bphy_0103	112793	113299	-	506	CDS		hypothetical protein	0	0
Bphy_0104	113629	114606	+	977	CDS		ATPase central domain-containing protein	0	0
Bphy_0105	114837	115124	+	287	CDS		hypothetical protein	0	0
Bphy_0106	115417	116523	+	1106	CDS		2-hydroxyglutarate dehydrogenase	0	0
Bphy_0107	116726	117040	+	314	CDS		high potential iron-sulfur protein	0	0
Bphy_0108	117052	117351	+	299	CDS		hypothetical protein	0	0
Bphy_0109	117293	118615	+	1322	CDS		general substrate transporter	0	0
Bphy_0110	118619	120133	-	1514	CDS		amidase	0	0
Bphy_0111	120270	120968	-	698	CDS		carboxymethylenebutenolidase	0	0
Bphy_0112	121607	122752	+	1145	CDS		extracellular ligand-binding receptor	0	0
Bphy_0113	122916	123914	+	998	CDS		transcription factor jumonji domain-containing protein	0	0
Bphy_0114	123950	125161	-	1211	CDS		major facilitator transporter	0	0
Bphy_0115	125383	126048	+	665	CDS		pyridoxamine 5'-phosphate oxidase-like protein	0	0
Bphy_0116	126407	126709	+	302	CDS		histone family protein nucleoid-structuring protein H-NS	0	0
Bphy_0117	126957	128159	+	1202	CDS		cation diffusion facilitator family transporter	0	0
Bphy_0118	128169	128627	-	458	CDS		AsnC family transcriptional regulator	0	0
Bphy_0119	128731	129345	-	614	CDS		hypothetical protein	0	0
Bphy_0120	129342	129986	-	644	CDS		beta-lactamase domain-containing protein	0	0
Bphy_0121	130629	131228	+	599	CDS		rare lipoprotein A	0	0
Bphy_0122	131307	132182	-	875	CDS		uroporphyrin-III C/tetrapyrrole methyltransferase	0	0
Bphy_0123	132181	132651	+	470	CDS		hypothetical protein	0	0
Bphy_0124	132877	133464	+	587	CDS		phosphoheptose isomerase	0	0
Bphy_0125	133485	134288	+	803	CDS		transport-associated	0	0
Bphy_0126	134285	134632	+	347	CDS		cytochrome c class I	0	0
Bphy_0127	134929	136038	+	1109	CDS		hypothetical protein	0	0
Bphy_0128	136035	137750	+	1715	CDS		feruloyl esterase	0	0
Bphy_0129	138001	138864	+	863	CDS		anti-sigma-factor antagonist	0	0
Bphy_0130	138874	139230	+	356	CDS		anti-sigma-factor antagonist	0	0
Bphy_0131	139250	139675	+	425	CDS		putative anti-sigma regulatory factor, serine/threonine protein kinase	0	0
Bphy_0132	139660	140808	+	1148	CDS		putative anti-sigma regulatory factor, serine/threonine protein kinase	0	0
Bphy_0133	140895	142343	+	1448	CDS		histidine kinase	0	0
Bphy_0134	142340	143983	+	1643	CDS		histidine kinase	0	0
Bphy_0135	144107	149002	+	4895	CDS		multi-sensor hybrid histidine kinase	0	0
Bphy_0136	149102	149725	+	623	CDS		hypothetical protein	0	0
Bphy_0137	150067	151614	+	1547	CDS		methyl-accepting chemotaxis sensory transducer	0	0
Bphy_0138	151789	153096	+	1307	CDS		uracil-xanthine permease	0	0
Bphy_0139	153168	154832	-	1664	CDS		Na+/H+ antiporter	0	0
Bphy_0140	155217	156491	+	1274	CDS		diguanylate phosphodiesterase	0	0
Bphy_0141	156536	157225	+	689	CDS		CutC family protein	0	0
Bphy_0142	157261	157557	-	296	CDS		eplicon_xref "NC_010622"	0	0
Bphy_0143	157599	161189	-	3590	CDS		2-oxoacid ferredoxin oxidoreductase	0	0
Bphy_0144	161632	162249	+	617	CDS		glutathione S-transferase domain-containing protein	0	0
Bphy_0145	162277	163218	-	941	CDS		K+ channel inward rectifier domain-containing protein	0	0
Bphy_0146	163365	163610	-	245	CDS		hypothetical protein	0	0
Bphy_0147	163714	163953	-	239	CDS		hypothetical protein	0	0
Bphy_0148	164095	165021	-	926	CDS		ribokinase-like domain-containing protein	0	0
Bphy_0149	165040	166302	-	1262	CDS		N-acylglucosamine 2-epimerase	0	0
Bphy_0150	166299	167285	-	986	CDS		LacI family transcription regulator	0	0
Bphy_0151	167683	169524	-	1841	CDS		diguanylate cyclase/phosphodiesterase	0	0
Bphy_0152	169801	170823	-	1022	CDS		bile acid:sodium symporter	0	0
Bphy_0153	171381	171995	+	614	CDS		hypothetical protein	0	0
Bphy_0154	172525	173628	+	1103	CDS		porin	0	0
Bphy_0155	173794	174732	+	938	CDS		LysR family transcriptional regulator	0	0
Bphy_0156	174860	178243	+	3383	CDS		methylmalonyl-CoA mutase large subunit	0	0
Bphy_0157	178306	179265	-	959	CDS		2-nitropropane dioxygenase	0	0
Bphy_0158	179525	180415	+	890	CDS		alpha/beta hydrolase fold protein	0	0
Bphy_0159	180445	180930	-	485	CDS		AsnC family transcriptional regulator	0	0
Bphy_0160	181042	181941	+	899	CDS		hypothetical protein	0	0
Bphy_0161	182173	183093	-	920	CDS		beta-lactamase domain-containing protein	0	0
Bphy_0162	183090	183545	-	455	CDS		dehydratase	0	0
Bphy_0163	183542	183790	-	248	CDS		hypothetical protein	0	0
Bphy_0164	183787	184320	-	533	CDS		YbaK/prolyl-tRNA synthetase associated protein	0	0
Bphy_0165	184342	185268	-	926	CDS		hydroxymethylglutaryl-CoA lyase	0	0
Bphy_0166	185385	186326	-	941	CDS		D-isomer specific 2-hydroxyacid dehydrogenase	0	0
Bphy_0167	186570	187172	+	602	CDS		hypothetical protein	0	0
Bphy_0168	187197	187427	-	230	CDS		hypothetical protein	0	0
Bphy_0169	187790	188815	+	1025	CDS		sulfate ABC transporter periplasmic sulfate-binding protein	0	0
Bphy_0170	188981	190036	-	1055	CDS		biotin synthase	0	0
Bphy_0171	190073	190792	-	719	CDS		bioD ,dithiobiotin synthetase	0	0
Bphy_0172	190789	191973	-	1184	CDS		8-amino-7-oxononanoate synthase	0	0
Bphy_0173	191973	193319	-	1346	CDS		adenosylmethionine--8-amino-7-oxononanoate transaminase	0	0
Bphy_0175	195745	196191	-	446	CDS		hypothetical protein	0	0
Bphy_0176	196210	197340	-	1130	CDS		acyl-CoA dehydrogenase domain-containing protein	0	0
Bphy_0177	197377	198054	-	677	CDS		short chain dehydrogenase	0	0
Bphy_0178	198103	199293	-	1190	CDS		acetyl-CoA acetyltransferase	0	0
Bphy_0179	199286	200062	-	776	CDS		carbonate dehydratase	0	0
Bphy_0180	200123	201931	-	1808	CDS	aceK	aceK ,bifunctional isocitrate dehydrogenase kinase/phosphatase protein	0	0
Bphy_0181	202155	202589	-	434	CDS		MerR family transcriptional regulator	0	0
Bphy_0182	202753	203823	+	1070	CDS		beta-lactamase domain-containing protein	0	0
Bphy_0183	203927	205525	-	1598	CDS		extracellular solute-binding protein	0	0
Bphy_0184	205739	206551	-	812	CDS		periplasmic binding protein	0	0
Bphy_0185	206555	207325	-	770	CDS		short chain dehydrogenase	0	0
Bphy_0186	207344	207982	-	638	CDS		DSBA oxidoreductase	0	0
Bphy_0187	208136	208933	-	797	CDS		sporulation domain-containing protein	0	0
Bphy_0188	209034	210818	-	1784	CDS	argS	,arginyl-tRNA synthetase	0	0
Bphy_0189	211190	211516	+	326	CDS		hypothetical protein	0	0
Bphy_0190	211959	214676	-	2717	CDS		methionine synthase	0	0
Bphy_0191	214738	215808	-	1070	CDS		homocysteine S-methyltransferase	0	0
Bphy_0192	216124	216381	-	257	CDS		hypothetical protein	0	0
Bphy_0193	216499	217287	-	788	CDS		alpha/beta hydrolase fold protein	0	0
Bphy_0194	217504	218733	-	1229	CDS		hypothetical protein	0	0
Bphy_0195	218859	219749	-	890	CDS		IclR family transcriptional regulator	0	0
Bphy_0196	219910	220902	+	992	CDS		fumarylacetoacetate (FAA) hydrolase	0	0
Bphy_0197	221102	222295	+	1193	CDS		extracellular ligand-binding receptor	0	0
Bphy_0198	222377	223237	+	860	CDS		enoyl-CoA hydratase	0	0
Bphy_0199	223414	224157	+	743	CDS		hypothetical protein	0	0
Bphy_0200	224717	225589	+	872	CDS		hypothetical protein	0	0
Bphy_0201	225714	226196	+	482	CDS		rfaE bifunctional protein	0	0
Bphy_0202	226244	226483	-	239	CDS		hypothetical protein	0	0
Bphy_0203	226523	227392	-	869	CDS		pantothenate kinase	0	0
Bphy_0204	227389	228348	-	959	CDS		biotin--protein ligase	0	0
Bphy_0205	228496	229635	+	1139	CDS		hypothetical protein	0	0
Bphy_0206	229632	230522	+	890	CDS		ABC transporter-like protein	0	0
Bphy_0207	230664	231626	+	962	CDS		hypothetical protein	0	0
Bphy_0208	231645	232271	+	626	CDS		hypothetical protein	0	0
Bphy_0209	232302	233462	+	1160	CDS		VanZ family protein	0	0
Bphy_0210	233608	233931	+	323	CDS		putative ferredoxin	0	0
Bphy_0211	233954	234598	+	644	CDS		hypothetical protein	0	0
Bphy_0212	234977	236206	+	1229	CDS		Serine-type D-Ala-D-Ala carboxypeptidase	0	0
Bphy_0213	236305	236574	+	269	CDS		hypothetical protein	0	0
Bphy_0214	236608	237612	-	1004	CDS		DNA-binding transcriptional activator GcvA	0	0
Bphy_0215	237711	238037	+	326	CDS		hypothetical protein	0	0
Bphy_0216	238110	238877	+	767	CDS		lipB ,lipoate-protein ligase B	0	0
Bphy_0217	238891	239895	+	1004	CDS		lipoyl synthase	0	0
Bphy_0218	240128	241816	+	1688	CDS		sodium-dependent inorganic phosphate (Pi) transporter	0	0
Bphy_0219	241824	242597	-	773	CDS		DeoR family transcriptional regulator	0	0
Bphy_0220	243038	243802	+	764	CDS		ugpQ ,cytoplasmic glycerophosphodiester phosphodiesterase	0	0
Bphy_0221	243893	244990	+	1097	CDS		extracellular solute-binding protein	0	0
Bphy_0222	245099	246043	+	944	CDS		binding-protein-dependent transport systems inner membrane component	0	0
Bphy_0223	246040	246831	+	791	CDS		binding-protein-dependent transport systems inner membrane component	0	0
Bphy_0224	246852	247931	+	1079	CDS		spermidine/putrescine ABC transporter ATPase	0	0
Bphy_0225	248341	249621	+	1280	CDS	dctA1	C4-dicarboxylate transporter DctA	0	0
Bphy_0226	249625	251676	+	2051	CDS		integral membrane sensor signal transduction histidine kinase	0	0
Bphy_0227	251706	253064	+	1358	CDS		two component, sigma54 specific, Fis family transcriptional regulator	0	0
Bphy_0228	253149	253673	-	524	CDS		redoxin domain-containing protein	0	0
Bphy_0229	253846	254454	+	608	CDS		hypothetical protein	0	0
Bphy_0231	256256	258205	+	1949	CDS		hypothetical protein	0	0
Bphy_0233	260413	261009	+	596	CDS		hypothetical protein	0	0
Bphy_0234	261016	262260	+	1244	CDS		hypothetical protein	0	0
Bphy_0235	262310	263497	-	1187	CDS		hypothetical protein	0	0
Bphy_0236	263893	266946	+	3053	CDS		hypothetical protein	0	0
Bphy_0237	266943	269915	+	2972	CDS		SNF2-like protein	0	0
Bphy_0238	269916	270908	-	992	CDS		hypothetical protein	0	0
Bphy_0239	270901	272640	-	1739	CDS		NERD domain-containing protein	0	0
Bphy_0240	272643	278936	-	6293	CDS		helicase superfamily protein	0	0
Bphy_0241	279209	279430	-	221	CDS		phage transcriptional regulator AlpA	0	0
Bphy_0242	279867	280988	+	1121	CDS		integrase family protein	0	0
Bphy_0243	281394	281735	+	341	CDS		hypothetical protein	0	0
Bphy_0244	282639	286271	+	3632	CDS		hypothetical protein	0	0
Bphy_0245	286279	287766	+	1487	CDS		hypothetical protein	0	0
Bphy_0247	292826	293647	-	821	CDS		hypothetical protein	0	0
Bphy_0248	294196	294657	-	461	CDS		hypothetical protein	0	0
Bphy_0249	294863	295270	+	407	CDS		XRE family transcriptional regulator	0	0
Bphy_0250	295405	296730	+	1325	CDS		hypothetical protein	0	0
Bphy_0251	297155	297871	+	716	CDS		hypothetical protein	0	0
Bphy_0252	297861	298133	-	272	CDS		XRE family transcriptional regulator	0	0
Bphy_0253	298229	298702	+	473	CDS		hypothetical protein	0	0
Bphy_0254	298886	299122	-	236	CDS		Mg chelatase subunit D/I family protein	0	0
Bphy_0255	299223	299477	-	254	CDS		hypothetical protein	0	0
Bphy_0256	299890	300228	+	338	CDS		nitrogen regulatory protein P-II	0	0
Bphy_0257	300255	301760	+	1505	CDS		ammonium transporter	0	0
Bphy_0258	302014	303303	+	1289	CDS		glutamate--cysteine ligase	0	0
Bphy_0259	303493	304449	+	956	CDS		glutathione synthetase	0	0
Bphy_0260	304730	305227	+	497	CDS		PTS system fructose subfamily transporter subunit IIA	0	0
Bphy_0261	305289	305558	+	269	CDS		phosphotransferase system, phosphocarrier protein HPr	0	0
Bphy_0262	305778	307520	+	1742	CDS		phosphoenolpyruvate-protein phosphotransferase	0	0
Bphy_0263	307568	308326	-	758	CDS		UBA/THIF-type NAD/FAD binding protein	0	0
Bphy_0264	308469	310061	-	1592	CDS		carboxyl-terminal protease	0	0
Bphy_0265	310206	310499	+	293	CDS		hypothetical protein	0	0
Bphy_0266	310518	311264	-	746	CDS		gpmA ,phosphoglyceromutase	0	0
Bphy_0267	311357	311842	+	485	CDS		rhodanese domain-containing protein	0	0
Bphy_0268	311854	312102	+	248	CDS		glutaredoxin 3	0	0
Bphy_0269	312296	312766	+	470	CDS		preprotein translocase subunit SecB	0	0
Bphy_0270	312788	313786	+	998	CDS		gpsA ,NAD(P)H-dependent glycerol-3-phosphate dehydrogenase	0	0
Bphy_0271	313940	314491	+	551	CDS		appr-1-p processing domain-containing protein	0	0
Bphy_0272	314464	314934	-	470	CDS		RNA methyltransferase	0	0
Bphy_0273	314952	315758	-	806	CDS		putative competence protein F-like protein	0	0
Bphy_0274	315848	316807	+	959	CDS		type 11 methyltransferase	0	0
Bphy_0275	317078	317572	+	494	CDS		hypothetical protein	0	0
Bphy_0276	317629	319302	+	1673	CDS		cytochrome c oxidase subunit II	0	0
Bphy_0277	319348	320961	+	1613	CDS		cytochrome c oxidase subunit I	0	0
Bphy_0278	321059	321196	+	137	CDS		hypothetical protein	0	0
Bphy_0279	321249	321860	+	611	CDS		cytochrome C oxidase assembly protein	0	0
Bphy_0280	321900	322106	+	206	CDS		hypothetical protein	0	0
Bphy_0281	322264	323121	+	857	CDS		cytochrome c oxidase subunit III	0	0
Bphy_0282	323355	323564	-	209	CDS		hypothetical protein	0	0
Bphy_0283	323652	324419	+	767	CDS		hypothetical protein	0	0
Bphy_0284	324480	325151	+	671	CDS		hypothetical protein	0	0
Bphy_0285	325203	326312	+	1109	CDS		cytochrome oxidase assembly	0	0
Bphy_0286	326318	327223	+	905	CDS		protoheme IX farnesyltransferase	0	0
Bphy_0287	327228	327845	+	617	CDS		electron transport protein SCO1/SenC	0	0
Bphy_0288	327923	328213	-	290	CDS		YciI-like protein	0	0
Bphy_0289	328433	330229	+	1796	CDS		methyl-accepting chemotaxis sensory transducer	0	0
Bphy_0290	330475	331287	+	812	CDS		YaeC family lipoprotein	0	0
Bphy_0291	331378	332301	-	923	CDS		MarR family transcriptional regulator	0	0
Bphy_0292	332679	333413	+	734	CDS		GntR family transcriptional regulator	0	0
Bphy_0293	333493	334596	+	1103	CDS		N-acetylglucosamine-6-phosphate deacetylase	0	0
Bphy_0294	334589	335596	+	1007	CDS		glutamine--fructose-6-phosphate transaminase	0	0
Bphy_0295	335610	338195	+	2585	CDS		phosphoenolpyruvate-protein phosphotransferase	0	0
Bphy_0296	338304	340070	+	1766	CDS		PTS system N-acetylglucosamine-specific transporter subunit IIBC	0	0
Bphy_0297	340141	340260	-	119	CDS		cyd operon protein YbgT	0	0
Bphy_0298	340272	341408	-	1136	CDS		cytochrome d ubiquinol oxidase subunit II	0	0
Bphy_0299	341435	343024	-	1589	CDS		cytochrome bd ubiquinol oxidase subunit I	0	0
Bphy_0300	343014	343286	-	272	CDS		hypothetical protein	0	0
Bphy_0301	343600	344535	-	935	CDS		RNA polymerase factor sigma-32	0	0
Bphy_0302	344862	345461	+	599	CDS		hypothetical protein	0	0
Bphy_0303	345507	345890	+	383	CDS		hypothetical protein	0	0
Bphy_0304	346020	347675	-	1655	CDS		2-isopropylmalate synthase	0	0
Bphy_0305	348195	349163	-	968	CDS		glycosyl transferase family protein	0	0
Bphy_0306	349409	350107	+	698	CDS		fumarylacetoacetate (FAA) hydrolase	0	0
Bphy_0307	350142	350786	+	644	CDS		maleylacetoacetate isomerase	0	0
Bphy_0308	350900	352078	-	1178	CDS	ftsY	signal recognition particle-docking protein FtsY	0	0
Bphy_0309	352403	353017	+	614	CDS		methyltransferase	0	0
Bphy_0310	353135	353641	+	506	CDS	coaD	phosphopantetheine adenylyltransferase	0	0
Bphy_0311	353788	354045	+	257	CDS		4Fe-4S ferredoxin iron-sulfur binding domain-containing protein	0	0
Bphy_0312	354115	355206	-	1091	CDS		histidinol-phosphate aminotransferase	0	0
Bphy_0313	355246	355848	-	602	CDS		peptidyl-tRNA hydrolase	0	0
Bphy_0314	355969	356580	-	611	CDS		50S ribosomal protein L25/general stress protein Ctc	0	0
Bphy_0315	356737	357693	-	956	CDS		ribose-phosphate pyrophosphokinase	0	0
Bphy_0316	357869	358750	-	881	CDS		ipk ,4-diphosphocytidyl-2-C-methyl-D-erythritol kinase	0	0
Bphy_0317	358777	359409	-	632	CDS		lolB ,outer membrane lipoprotein LolB	0	0
Bphy_0318	359409	361250	-	1841	CDS		TPR repeat-containing protein	0	0
Bphy_0319	361338	362168	+	830	CDS		formamidopyrimidine-DNA glycosylase	0	0
Bphy_0320	362176	363285	+	1109	CDS		A/G-specific adenine glycosylase	0	0
Bphy_0321	363296	363931	-	635	CDS		peptidase S16 lon domain-containing protein	0	0
Bphy_0322	363991	364884	-	893	CDS		hypothetical protein	0	0
Bphy_0323	364962	365930	-	968	CDS		HPr kinase/phosphorylase	0	0
Bphy_0324	366165	366680	-	515	CDS		putative PTS IIA-like nitrogen-regulatory protein PtsN	0	0
Bphy_0325	366930	367289	-	359	CDS		sigma 54 modulation protein/30S ribosomal protein S30EA	0	0
Bphy_0326	367463	368980	-	1517	CDS		RNA polymerase factor sigma-54	0	0
Bphy_0327	369208	369990	-	782	CDS		ABC transporter-like protein	0	0
Bphy_0328	369987	370664	-	677	CDS		lipopolysaccharide transport periplasmic protein LptA	0	0
Bphy_0329	370697	371290	-	593	CDS		hypothetical protein	0	0
Bphy_0330	371287	371850	-	563	CDS		3-deoxy-D-manno-octulosonate 8-phosphate phosphatase	0	0
Bphy_0331	371850	372890	-	1040	CDS		KpsF/GutQ family protein	0	0
Bphy_0332	372982	374985	+	2003	CDS		sodium/hydrogen exchanger	0	0
Bphy_0333	375110	375676	+	566	CDS		adenine phosphoribosyltransferase	0	0
Bphy_0334	375702	376316	+	614	CDS		lysine exporter protein LysE/YggA	0	0
Bphy_0335	376371	377219	+	848	CDS		NUDIX hydrolase	0	0
Bphy_0336	377293	378156	+	863	CDS		purU ,formyltetrahydrofolate deformylase	0	0
Bphy_0337	378233	379471	-	1238	CDS		PepSY-associated TM helix domain-containing protein	0	0
Bphy_0338	379722	380807	-	1085	CDS		hypothetical protein	0	0
Bphy_0339	380830	383928	-	3098	CDS		excinuclease ABC subunit A	0	0
Bphy_0340	384242	385399	+	1157	CDS		major facilitator transporter	0	0
Bphy_0341	385525	386043	+	518	CDS		single-stranded DNA-binding protein	0	0
Bphy_0342	386164	386907	-	743	CDS		short-chain dehydrogenase/reductase SDR	0	0
Bphy_0343	387038	387943	+	905	CDS		LysR family transcriptional regulator	0	0
Bphy_0344	387950	388753	-	803	CDS		hypothetical protein	0	0
Bphy_0345	389091	390734	+	1643	CDS		methyl-accepting chemotaxis sensory transducer	0	0
Bphy_0346	390851	391660	-	809	CDS		putative cytochrome c, class I	0	0
Bphy_0347	391657	393282	-	1625	CDS		cytochrome c oxidase subunit I	0	0
Bphy_0348	393269	393841	-	572	CDS		cytochrome c oxidase subunit II	0	0
Bphy_0349	393844	394026	-	182	CDS		hypothetical protein	0	0
Bphy_0350	394068	395453	-	1385	CDS		gluconate 2-dehydrogenase	0	0
Bphy_0351	395450	396172	-	722	CDS		putative periplasmic cytochrome c protein	0	0
Bphy_0352	396568	397461	-	893	CDS		LysR family transcriptional regulator	0	0
Bphy_0353	397559	398812	+	1253	CDS		major facilitator transporter	0	0
Bphy_0354	399472	400125	+	653	CDS		two component LuxR family transcriptional regulator	0	0
Bphy_0355	400234	400944	+	710	CDS		two component LuxR family transcriptional regulator	0	0
Bphy_0356	400999	401670	+	671	CDS		two component LuxR family transcriptional regulator	0	0
Bphy_0357	401854	402597	+	743	CDS		major intrinsic protein	0	0
Bphy_0358	402606	407063	+	4457	CDS		PAS/PAC sensor hybrid histidine kinase	0	0
Bphy_0359	407255	407689	+	434	CDS		CHRD domain-containing protein	0	0
Bphy_0360	407857	408807	+	950	CDS		alpha/beta hydrolase domain-containing protein	0	0
Bphy_0361	408777	409619	-	842	CDS		hypothetical protein	0	0
Bphy_0362	409827	411353	+	1526	CDS		EmrB/QacA family drug resistance transporter	0	0
Bphy_0363	411390	411860	+	470	CDS		MarR family transcriptional regulator	0	0
Bphy_0364	411930	413207	-	1277	CDS		putative D-serine deaminase	0	0
Bphy_0365	413349	414242	+	893	CDS		RpiR family transcriptional regulator	0	0
Bphy_0366	414246	415733	+	1487	CDS		N-acyl-D-amino-acid deacylase	0	0
Bphy_0367	415792	416178	+	386	CDS		endoribonuclease L-PSP	0	0
Bphy_0368	416342	417166	-	824	CDS		queF ,7-cyano-7-deazaguanine reductase	0	0
Bphy_0369	417163	418065	-	902	CDS		5'-nucleotidase	0	0
Bphy_0370	418075	419598	-	1523	CDS		threonine dehydratase	0	0
Bphy_0371	420306	424421	+	4115	CDS		FAD linked oxidase domain-containing protein	0	0
Bphy_0372	424454	424882	+	428	CDS		histidine triad (HIT) protein	0	0
Bphy_0373	424891	425304	+	413	CDS		hypothetical protein	0	0
Bphy_0374	425374	426105	+	731	CDS		ubiE ,ubiquinone/menaquinone biosynthesis methyltransferase	0	0
Bphy_0375	426142	427137	+	995	CDS		import inner membrane translocase subunit Tim44	0	0
Bphy_0376	427246	427890	+	644	CDS		sterol-binding domain-containing protein	0	0
Bphy_0377	427906	429489	+	1583	CDS		ubiB ,putative ubiquinone biosynthesis protein UbiB	0	0
Bphy_0378	429512	430153	+	641	CDS		thiopurine S-methyltransferase	0	0
Bphy_0379	430292	430636	+	344	CDS		FmdB family regulatory protein	0	0
Bphy_0380	430707	431363	+	656	CDS		hypothetical protein	0	0
Bphy_0381	431436	433235	+	1799	CDS		aspS ,aspartyl-tRNA synthetase	0	0
Bphy_0382	433406	433882	+	476	CDS		NUDIX hydrolase	0	0
Bphy_0383	433879	435159	+	1280	CDS		phospholipase D/transphosphatidylase	0	0
Bphy_0384	435400	436005	+	605	CDS		TetR family transcriptional regulator	0	0
Bphy_0386	438011	440455	+	2444	CDS		3-hydroxyacyl-CoA dehydrogenase	0	0
Bphy_0387	440467	441666	+	1199	CDS		acetyl-CoA acetyltransferase	0	0
Bphy_0388	441843	442607	+	764	CDS		enoyl-CoA hydratase	0	0
Bphy_0389	442626	443447	-	821	CDS		formate dehydrogenase family accessory protein FdhD	0	0
Bphy_0390	443564	444040	+	476	CDS		hypothetical protein	0	0
Bphy_0392	447404	447811	-	407	CDS		thioesterase superfamily protein	0	0
Bphy_0393	448102	449997	+	1895	CDS		ABC transporter-like protein	0	0
Bphy_0394	450074	450772	-	698	CDS		nucleotidyl transferase	0	0
Bphy_0396	452101	454467	+	2366	CDS		organic solvent tolerance protein	0	0
Bphy_0397	454623	456014	+	1391	CDS		SurA domain-containing protein	0	0
Bphy_0398	456029	457030	+	1001	CDS		pdxA ,4-hydroxythreonine-4-phosphate dehydrogenase	0	0
Bphy_0399	457051	457881	+	830	CDS		ksgA ,dimethyladenosine transferase	0	0
Bphy_0400	458105	459232	+	1127	CDS		porin	0	0
Bphy_0401	459311	459697	+	386	CDS		lactoylglutathione lyase	0	0
Bphy_0402	459747	460604	-	857	CDS		hypothetical protein	0	0
Bphy_0403	460664	461422	-	758	CDS		phospholipid/glycerol acyltransferase	0	0
Bphy_0404	461460	462017	-	557	CDS		D,D-heptose 1,7-bisphosphate phosphatase	0	0
Bphy_0405	462028	464127	-	2099	CDS		glyS ,glycyl-tRNA synthetase subunit beta	0	0
Bphy_0406	464143	465150	-	1007	CDS		glyQ ,glycyl-tRNA synthetase subunit alpha	0	0
Bphy_0407	465377	467071	-	1694	CDS		lnt ,apolipoprotein N-acyltransferase	0	0
Bphy_0408	467108	468004	-	896	CDS		CBS domain-containing protein	0	0
Bphy_0409	468147	468806	-	659	CDS		ChaC family protein	0	0
Bphy_0410	468892	469353	-	461	CDS		hypothetical protein	0	0
Bphy_0411	469384	470472	-	1088	CDS		PhoH family protein	0	0
Bphy_0413	472090	473115	-	1025	CDS		LysR family transcriptional regulator	0	0
Bphy_0414	473226	473621	+	395	CDS		hypothetical protein	0	0
Bphy_0415	473642	474820	+	1178	CDS		major facilitator transporter	0	0
Bphy_0416	475072	475761	+	689	CDS		XRE family transcriptional regulator	0	0
Bphy_0417	476228	476962	+	734	CDS		3,4-dihydroxy-2-butanone 4-phosphate synthase	0	0
Bphy_0418	477083	477769	-	686	CDS		HAD family hydrolase	0	0
Bphy_0419	477898	479397	-	1499	CDS		glpK ,glycerol kinase	0	0
Bphy_0420	479566	481101	-	1535	CDS		glpD ,glycerol-3-phosphate dehydrogenase	0	0
Bphy_0421	481314	481703	+	389	CDS		hypothetical protein	0	0
Bphy_0422	481900	482097	-	197	CDS		hypothetical protein	0	0
Bphy_0423	482491	483270	-	779	CDS		DeoR family transcriptional regulator	0	0
Bphy_0424	483689	484516	+	827	CDS		hypothetical protein	0	0
Bphy_0425	484555	485079	+	524	CDS		hypothetical protein	0	0
Bphy_0426	485125	486693	-	1568	CDS		DEAD/DEAH box helicase domain-containing protein	0	0
Bphy_0427	486890	487510	-	620	CDS		hemolysin III family channel protein	0	0
Bphy_0428	487684	488982	-	1298	CDS		gluconate 2-dehydrogenase	0	0
Bphy_0429	489003	489722	-	719	CDS		cytochrome c class I	0	0
Bphy_0430	490109	490591	+	482	CDS		copper resistance protein CopC	0	0
Bphy_0431	490588	491517	+	929	CDS		copper resistance D domain-containing protein	0	0
Bphy_0432	491555	491857	-	302	CDS		hypothetical protein	0	0
Bphy_0433	492157	493305	-	1148	CDS		galactonate dehydratase	0	0
Bphy_0434	493390	494253	+	863	CDS		GntR domain-containing protein	0	0
Bphy_0435	494266	494960	-	694	CDS		eplicon_xref "NC_010622"	0	0
Bphy_0436	495065	495376	+	311	CDS		MarR family transcriptional regulator	0	0
Bphy_0437	495664	497322	-	1658	CDS		major facilitator transporter	0	0
Bphy_0438	497550	499097	-	1547	CDS		integral membrane sensor signal transduction histidine kinase	0	0
Bphy_0439	499106	499867	-	761	CDS		two component transcriptional regulator	0	0
Bphy_0440	500114	501190	+	1076	CDS		recA ,recombinase A	0	0
Bphy_0441	501198	501986	+	788	CDS		regulatory protein RecX	0	0
Bphy_0442	502157	502894	+	737	CDS		hypothetical protein	0	0
Bphy_0443	502950	504119	+	1169	CDS		sucC ,succinyl-CoA synthetase subunit beta	0	0
Bphy_0444	504234	505115	+	881	CDS		succinyl-CoA synthetase subunit alpha	0	0
Bphy_0445	505276	505989	+	713	CDS		integral membrane protein TerC	0	0
Bphy_0446	506140	506757	+	617	CDS		putative type IV fimbrial pilin protein	0	0
Bphy_0447	507997	509703	+	1706	CDS		RNA-directed DNA polymerase	0	0
Bphy_0448	509828	511618	+	1790	CDS		O-antigen polymerase	0	0
Bphy_0449	511705	512181	-	476	CDS		moaC ,molybdenum cofactor biosynthesis protein MoaC	0	0
Bphy_0450	512380	514068	+	1688	CDS		peptidase M48 Ste24p	0	0
Bphy_0451	514065	514661	-	596	CDS		hypothetical protein	0	0
Bphy_0452	514654	515667	-	1013	CDS		putative hydrolase of the alpha/beta-hydrolase fold	0	0
Bphy_0453	515818	516264	-	446	CDS		hypothetical protein	0	0
Bphy_0454	516441	517466	-	1025	CDS		lipopolysaccharide heptosyltransferase II	0	0
Bphy_0455	517654	517848	-	194	CDS		hypothetical protein	0	0
Bphy_0456	517920	518843	-	923	CDS		branched-chain amino acid aminotransferase	0	0
Bphy_0457	519159	519914	+	755	CDS		AzlC family protein	0	0
Bphy_0458	519911	520234	+	323	CDS		branched-chain amino acid transport	0	0
Bphy_0459	520452	521645	+	1193	CDS		pgk ,phosphoglycerate kinase	0	0
Bphy_0460	522131	523567	+	1436	CDS		pyruvate kinase	0	0
Bphy_0461	523822	524886	+	1064	CDS		fructose-1,6-bisphosphate aldolase	0	0
Bphy_0462	525017	525907	+	890	CDS		phosphoribosylaminoimidazole-succinocarboxamide synthase	0	0
Bphy_0463	525932	526441	+	509	CDS		phosphoribosylaminoimidazole carboxylase, catalytic subunit	0	0
Bphy_0464	526516	527724	+	1208	CDS		phosphoribosylaminoimidazole carboxylase ATPase subunit	0	0
Bphy_0465	527737	528780	+	1043	CDS		Sua5/YciO/YrdC/YwlC family protein	0	0
Bphy_0466	528871	530082	-	1211	CDS		GDSL family lipase	0	0
Bphy_0467	530287	530670	-	383	CDS		me "C-5 sterol desaturase (pseudogene) ,C-5 sterol desaturase (pseudogene)"	0	0
Bphy_0467	530287	530670	-	383	CDS		me "C-5 sterol desaturase (pseudogene)"	0	0
Bphy_0468	530868	532421	-	1553	CDS		D-alanyl-D-alanine carboxypeptidase/D-alanyl-D-alanine-endopeptidase	0	0
Bphy_0469	532855	533517	+	662	CDS		two component transcriptional regulator	0	0
Bphy_0470	533522	534823	+	1301	CDS		integral membrane sensor signal transduction histidine kinase	0	0
Bphy_0471	534937	536439	+	1502	CDS		protease Do	0	0
Bphy_0472	536681	537178	+	497	CDS		hypothetical protein	0	0
Bphy_0473	537575	538018	+	443	CDS		hypothetical protein	0	0
Bphy_0474	538052	538798	+	746	CDS		carbon monoxide dehydrogenase subunit G	0	0
Bphy_0475	538886	539938	-	1052	CDS		AraC family transcriptional regulator	0	0
Bphy_0476	540086	540715	+	629	CDS		isochorismatase hydrolase	0	0
Bphy_0477	540808	541443	-	635	CDS		TetR family transcriptional regulator	0	0
Bphy_0478	541870	543120	+	1250	CDS		RND family efflux transporter MFP subunit	0	0
Bphy_0479	543138	546332	+	3194	CDS		hydrophobe/amphiphile efflux-1 (HAE1) family protein	0	0
Bphy_0480	546343	547860	+	1517	CDS		RND efflux system outer membrane lipoprotein	0	0
Bphy_0481	548106	549521	-	1415	CDS		xanthine permease	0	0
Bphy_0482	549945	551369	+	1424	CDS		carbohydrate kinase FGGY	0	0
Bphy_0483	551563	552669	+	1106	CDS		S-(hydroxymethyl)glutathione dehydrogenase/class III alcohol dehydrogenase	0	0
Bphy_0484	552681	553526	+	845	CDS		S-formylglutathione hydrolase	0	0
Bphy_0485	553594	554385	-	791	CDS		ABC-3 protein	0	0
Bphy_0486	554378	555307	-	929	CDS		ABC transporter-like protein	0	0
Bphy_0487	555304	556233	-	929	CDS		periplasmic solute binding protein	0	0
Bphy_0488	556291	556782	-	491	CDS		ferric uptake regulator family protein	0	0
Bphy_0489	557071	557853	+	782	CDS		sorbitol dehydrogenase	0	0
Bphy_0490	557943	559265	+	1322	CDS		extracellular solute-binding protein	0	0
Bphy_0491	559490	560428	+	938	CDS		binding-protein-dependent transport systems inner membrane component	0	0
Bphy_0492	560425	561291	+	866	CDS		binding-protein-dependent transport systems inner membrane component	0	0
Bphy_0493	561288	561980	+	692	CDS		HAD family hydrolase	0	0
Bphy_0494	562070	563179	+	1109	CDS		ABC transporter-like protein	0	0
Bphy_0495	563428	565206	+	1778	CDS		TPR repeat-containing protein	0	0
Bphy_0496	565235	566203	-	968	CDS		DeoR family transcriptional regulator	0	0
Bphy_0497	566315	567799	-	1484	CDS		xylulokinase	0	0
Bphy_0498	567970	569379	-	1409	CDS		mannitol dehydrogenase domain-containing protein	0	0
Bphy_0499	569948	570967	+	1019	CDS		AraC family transcriptional regulator	0	0
Bphy_0500	571056	572021	+	965	CDS		periplasmic binding protein/LacI transcriptional regulator	0	0
Bphy_0501	572085	573620	+	1535	CDS		ABC transporter-like protein	0	0
Bphy_0502	573607	574608	+	1001	CDS		monosaccharide-transporting ATPase	0	0
Bphy_0503	574653	575741	+	1088	CDS		alcohol dehydrogenase	0	0
Bphy_0504	575810	577354	+	1544	CDS		xylulokinase	0	0
Bphy_0505	577351	578091	+	740	CDS		short chain dehydrogenase	0	0
Bphy_0506	578240	579175	-	935	CDS		tryptophan 2,3-dioxygenase	0	0
Bphy_0507	579186	580436	-	1250	CDS		kynureninase	0	0
Bphy_0508	580483	581112	-	629	CDS		arylformamidase	0	0
Bphy_0509	581244	581747	+	503	CDS		AsnC family transcriptional regulator	0	0
Bphy_0510	581797	582321	-	524	CDS		flavin reductase domain-containing protein	0	0
Bphy_0511	582616	583167	+	551	CDS		peptide methionine sulfoxide reductase	0	0
Bphy_0512	583234	584373	-	1139	CDS		hypothetical protein	0	0
Bphy_0514	585846	586484	-	638	CDS		pyridoxamine 5'-phosphate oxidase	0	0
Bphy_0515	586736	587596	+	860	CDS		UBA/THIF-type NAD/FAD binding protein	0	0
Bphy_0516	587687	588535	-	848	CDS		thioredoxin	0	0
Bphy_0517	588649	589530	-	881	CDS		pirin domain-containing protein	0	0
Bphy_0518	589700	590581	+	881	CDS		hypothetical protein	0	0
Bphy_0519	590711	592258	-	1547	CDS		N-acetylmuramoyl-L-alanine amidase	0	0
Bphy_0520	592240	592794	-	554	CDS		hypothetical protein	0	0
Bphy_0521	592812	594104	+	1292	CDS		iron-sulfur cluster binding protein	0	0
Bphy_0522	594145	594615	+	470	CDS		methylated-DNA--protein-cysteine methyltransferase	0	0
Bphy_0523	594612	595559	+	947	CDS		xerD ,site-specific tyrosine recombinase XerD	0	0
Bphy_0524	595584	597161	-	1577	CDS		AMP-dependent synthetase and ligase	0	0
Bphy_0525	597309	597836	+	527	CDS		ybaK/ebsC protein	0	0
Bphy_0526	597994	598626	+	632	CDS		putative glycerol-3-phosphate acyltransferase PlsY	0	0
Bphy_0527	598702	599187	-	485	CDS		putative nucleotide-binding protein	0	0
Bphy_0528	599359	600399	+	1040	CDS		murB ,UDP-N-acetylenolpyruvoylglucosamine reductase	0	0
Bphy_0529	600499	601428	-	929	CDS		ornithine carbamoyltransferase	0	0
Bphy_0530	601890	602225	+	335	CDS		hypothetical protein	0	0
Bphy_0531	602428	602706	-	278	CDS		rpsT ,30S ribosomal protein S20	0	0
Bphy_0532	603187	604737	+	1550	CDS		integral membrane protein MviN	0	0
Bphy_0533	604734	605585	+	851	CDS		hypothetical protein	0	0
Bphy_0534	605666	606424	-	758	CDS		short-chain dehydrogenase/reductase SDR	0	0
Bphy_0535	606652	607317	-	665	CDS		adk ,adenylate kinase	0	0
Bphy_0536	607579	608382	-	803	CDS		3-deoxy-manno-octulosonate cytidylyltransferase	0	0
Bphy_0537	608514	608717	-	203	CDS		hypothetical protein	0	0
Bphy_0538	608698	609714	-	1016	CDS		tetraacyldisaccharide 4'-kinase	0	0
Bphy_0539	610302	611681	+	1379	CDS		xseA ,exodeoxyribonuclease VII large subunit	0	0
Bphy_0540	611889	612467	+	578	CDS		superoxide dismutase	0	0
Bphy_0541	612689	614011	-	1322	CDS		hypothetical protein	0	0
Bphy_0542	614099	614698	-	599	CDS		isochorismatase hydrolase	0	0
Bphy_0543	614747	615358	+	611	CDS		TetR family transcriptional regulator	0	0
Bphy_0544	615380	616033	-	653	CDS		ATP-dependent Clp protease, proteolytic subunit ClpP	0	0
Bphy_0545	616193	617152	+	959	CDS		ECF subfamily RNA polymerase sigma-24 factor	0	0
Bphy_0546	617108	618382	-	1274	CDS		diguanylate phosphodiesterase	0	0
Bphy_0547	618653	620122	-	1469	CDS		EmrB/QacA family drug resistance transporter	0	0
Bphy_0548	620238	621650	-	1412	CDS		transcriptional regulator	0	0
Bphy_0549	621832	622143	+	311	CDS		hypothetical protein	0	0
Bphy_0550	622170	623414	-	1244	CDS		citrate synthase	0	0
Bphy_0551	623533	624927	+	1394	CDS		L-carnitine dehydratase/bile acid-inducible protein F	0	0
Bphy_0552	624955	625701	-	746	CDS		GntR family transcriptional regulator	0	0
Bphy_0553	625881	626726	+	845	CDS		aldo/keto reductase	0	0
Bphy_0554	626781	627248	+	467	CDS		hypothetical protein	0	0
Bphy_0555	627422	629527	-	2105	CDS		oligopeptide/dipeptide ABC transporter ATPase	0	0
Bphy_0556	629524	630423	-	899	CDS		binding-protein-dependent transport systems inner membrane component	0	0
Bphy_0557	630420	631430	-	1010	CDS		binding-protein-dependent transport systems inner membrane component	0	0
Bphy_0558	631460	633145	-	1685	CDS		extracellular solute-binding protein	0	0
Bphy_0559	633404	634423	-	1019	CDS		high-affinity nickel-transporter	0	0
Bphy_0560	634452	634937	-	485	CDS		cupin 2 domain-containing protein	0	0
Bphy_0561	635154	637259	-	2105	CDS		translation elongation factor G	0	0
Bphy_0562	637527	638042	-	515	CDS		hypothetical protein	0	0
Bphy_0563	638164	638406	+	242	CDS		hypothetical protein	0	0
Bphy_0564	638815	639384	-	569	CDS		pseudouridine synthase	0	0
Bphy_0565	639716	640972	+	1256	CDS		isocitrate dehydrogenase	0	0
Bphy_0566	641531	642664	+	1133	CDS		eplicon_xref "NC_010622"	0	0
Bphy_0567	642761	642967	-	206	CDS		cold-shock DNA-binding domain-containing protein	0	0
Bphy_0568	643500	643814	+	314	CDS	clpS	clpS ,ATP-dependent Clp protease adaptor protein ClpS	0	0
Bphy_0569	643811	646111	+	2300	CDS		ATP-dependent Clp protease, ATP-binding subunit clpA	0	0
Bphy_0570	646213	646659	-	446	CDS		deoxyuridine 5'-triphosphate nucleotidohydrolase Dut	0	0
Bphy_0571	646724	647728	-	1004	CDS		luciferase family protein	0	0
Bphy_0572	647802	649013	-	1211	CDS		bifunctional phosphopantothenoylcysteine decarboxylase/phosphopantothenate synthase	0	0
Bphy_0573	649163	649663	-	500	CDS		lspA ,lipoprotein signal peptidase	0	0
Bphy_0574	649663	652500	-	2837	CDS		ileS ,isoleucyl-tRNA synthetase	0	0
Bphy_0576	653799	654464	+	665	CDS		phosphoribosylglycinamide formyltransferase	0	0
Bphy_0577	654461	655720	+	1259	CDS		Fmu (Sun) domain-containing protein	0	0
Bphy_0578	655807	657162	+	1355	CDS		mechanosensitive ion channel MscS	0	0
Bphy_0579	657363	658565	+	1202	CDS		fatty acid desaturase	0	0
Bphy_0580	658697	659827	+	1130	CDS		quinolinate synthetase	0	0
Bphy_0581	659827	660729	+	902	CDS		nicotinate-nucleotide pyrophosphorylase	0	0
Bphy_0582	660810	662408	-	1598	CDS		L-aspartate oxidase	0	0
Bphy_0583	662653	662820	-	167	CDS		rpmG ,50S ribosomal protein L33	0	0
Bphy_0584	662831	663064	-	233	CDS		rpmB ,50S ribosomal protein L28	0	0
Bphy_0585	663323	664051	-	728	CDS		radC ,DNA repair protein RadC	0	0
Bphy_0586	664241	664696	+	455	CDS		FKBP-type peptidylprolyl isomerase	0	0
Bphy_0587	664699	665658	+	959	CDS		ispH ,4-hydroxy-3-methylbut-2-enyl diphosphate reductase	0	0
Bphy_0589	667624	668574	+	950	CDS		inner-membrane translocator	0	0
Bphy_0590	668602	669771	+	1169	CDS		inner-membrane translocator	0	0
Bphy_0591	669794	670570	+	776	CDS		ABC transporter-like protein	0	0
Bphy_0592	670570	671286	+	716	CDS		ABC transporter-like protein	0	0
Bphy_0593	671449	671910	-	461	CDS		putative acetyltransferase	0	0
Bphy_0594	671907	673091	-	1184	CDS	argD1	acetylornithine transaminase protein	0	0
Bphy_0595	673139	673366	+	227	CDS		hypothetical protein	0	0
Bphy_0596	673422	674453	-	1031	CDS		CDP-6-deoxy-delta-3,4-glucoseen reductase	0	0
Bphy_0597	674491	675579	+	1088	CDS		NAD-dependent epimerase/dehydratase	0	0
Bphy_0598	675600	675788	-	188	CDS		hypothetical protein	0	0
Bphy_0599	675954	676658	-	704	CDS		pseudouridine synthase	0	0
Bphy_0600	676971	677900	-	929	CDS		hypothetical protein	0	0
Bphy_0601	678209	679609	+	1400	CDS		amino acid permease-associated protein	0	0
Bphy_0602	680339	681751	-	1412	CDS		coproporphyrinogen III oxidase	0	0
Bphy_0603	682009	682305	+	296	CDS		hypothetical protein	0	0
Bphy_0604	682395	682988	+	593	CDS		hypothetical protein	0	0
Bphy_0605	683062	683898	+	836	CDS		undecaprenyl pyrophosphate phosphatase	0	0
Bphy_0606	683989	684795	-	806	CDS		trmB ,tRNA (guanine-N(7)-)-methyltransferase	0	0
Bphy_0607	685152	685715	-	563	CDS		hypothetical protein	0	0
Bphy_0608	685852	686172	-	320	CDS	ethD1	ethyl tert-butyl ether degradation EthD	0	0
Bphy_0609	686385	687264	-	879	CDS		eplicon_xref "NC_010622"	0	0
Bphy_0610	687534	687695	+	161	CDS		hypothetical protein	0	0
Bphy_0611	687673	687927	-	254	CDS		hypothetical protein	0	0
Bphy_0612	688090	688386	+	296	CDS		hypothetical protein	0	0
Bphy_0613	688503	689183	-	680	CDS		lysine exporter protein LysE/YggA	0	0
Bphy_0614	689259	690836	-	1577	CDS		UbiD family decarboxylase	0	0
Bphy_0615	691442	692656	+	1214	CDS		lytic transglycosylase	0	0
Bphy_0616	692737	693930	-	1193	CDS		aminotransferase	0	0
Bphy_0617	694054	694491	-	437	CDS		nusB ,transcription antitermination protein NusB	0	0
Bphy_0618	694488	695006	-	518	CDS		ribH ,6,7-dimethyl-8-ribityllumazine synthase	0	0
Bphy_0619	695096	696232	-	1136	CDS		bifunctional 3,4-dihydroxy-2-butanone 4-phosphate synthase/GTP cyclohydrolase II-like protein	0	0
Bphy_0620	696347	696961	-	614	CDS		riboflavin synthase subunit alpha	0	0
Bphy_0621	696986	698107	-	1121	CDS		riboflavin biosynthesis protein RibD	0	0
Bphy_0622	698147	699427	-	1280	CDS		glutamate-1-semialdehyde aminotransferase	0	0
Bphy_0623	699638	700288	-	650	CDS		hypothetical protein	0	0
Bphy_0624	700482	701690	+	1208	CDS		Bcr/CflA subfamily drug resistance transporter	0	0
Bphy_0625	701847	703766	-	1919	CDS		bifunctional glucokinase/RpiR family transcriptional regulator	0	0
Bphy_0626	703744	704451	-	707	CDS		6-phosphogluconolactonase	0	0
Bphy_0627	704599	706056	-	1457	CDS		glucose-6-phosphate 1-dehydrogenase	0	0
Bphy_0628	706586	707833	+	1247	CDS		extracellular solute-binding protein	0	0
Bphy_0629	707985	708926	+	941	CDS		binding-protein-dependent transport systems inner membrane component	0	0
Bphy_0630	708916	709773	+	857	CDS		binding-protein-dependent transport systems inner membrane component	0	0
Bphy_0631	709892	711007	+	1115	CDS		ABC transporter-like protein	0	0
Bphy_0632	711199	711819	-	620	CDS		hypothetical protein	0	0
Bphy_0633	711835	712635	-	800	CDS		Smr protein/MutS2	0	0
Bphy_0634	712813	713814	-	1001	CDS		thioredoxin reductase	0	0
Bphy_0635	714314	716581	+	2267	CDS		cell division FtsK/SpoIIIE	0	0
Bphy_0636	716618	717313	+	695	CDS		lolA ,outer-membrane lipoprotein carrier protein	0	0
Bphy_0637	717321	718235	-	914	CDS		LysR family transcriptional regulator	0	0
Bphy_0638	718397	719389	+	992	CDS		agmatinase	0	0
Bphy_0639	719663	721291	+	1628	CDS		TPR repeat-containing protein	0	0
Bphy_0640	721311	722627	-	1316	CDS		hydroxymethylpyrimidine transporter CytX	0	0
Bphy_0641	722871	724232	+	1361	CDS		recombination factor protein RarA	0	0
Bphy_0642	724326	725624	+	1298	CDS		seryl-tRNA synthetase	0	0
Bphy_0643	726158	726388	+	230	CDS		hypothetical protein	0	0
Bphy_0644	726816	728279	+	1463	CDS		PAS/PAC sensor signal transduction histidine kinase	0	0
Bphy_0645	728276	728998	+	722	CDS		two component LuxR family transcriptional regulator	0	0
Bphy_0646	729061	729447	+	386	CDS		response regulator receiver protein	0	0
Bphy_0647	729678	730955	+	1277	CDS		RND family efflux transporter MFP subunit	0	0
Bphy_0648	731005	734274	+	3269	CDS		hydrophobe/amphiphile efflux-1 (HAE1) family protein	0	0
Bphy_0649	734276	735766	+	1490	CDS		RND efflux system outer membrane lipoprotein	0	0
Bphy_0650	735763	737112	+	1349	CDS		PqiA family integral membrane protein	0	0
Bphy_0651	737109	738713	+	1604	CDS		hypothetical protein	0	0
Bphy_0652	738710	739300	+	590	CDS		hypothetical protein	0	0
Bphy_0653	739727	740512	+	785	CDS		methionine aminopeptidase, type I	0	0
Bphy_0654	740735	741277	+	542	CDS		GCN5-like N-acetyltransferase	0	0
Bphy_0655	741479	742327	+	848	CDS		septum formation inhibitor	0	0
Bphy_0656	742417	743232	+	815	CDS		septum site-determining protein MinD	0	0
Bphy_0657	743248	743502	+	254	CDS	minE	cell division topological specificity factor MinE	0	0
Bphy_0658	743764	744075	+	311	CDS		hypothetical protein	0	0
Bphy_0659	744198	744311	+	113	CDS		hypothetical protein	0	0
Bphy_0660	744381	745838	-	1457	CDS		chloride channel core	0	0
Bphy_0661	746046	747056	+	1010	CDS		lipopolysaccharide heptosyltransferase I	0	0
Bphy_0662	747877	748056	-	179	CDS		hypothetical protein	0	0
Bphy_0664	750119	750631	-	512	CDS		TonB protein	0	0
Bphy_0665	750937	752151	-	1214	CDS		coproporphyrinogen III oxidase	0	0
Bphy_0666	752148	752771	-	623	CDS		putative deoxyribonucleotide triphosphate pyrophosphatase	0	0
Bphy_0667	752764	753504	-	740	CDS		rph ,ribonuclease PH	0	0
Bphy_0668	753770	754729	+	959	CDS		hypothetical protein	0	0
Bphy_0669	754746	755432	+	686	CDS		gmk ,guanylate kinase	0	0
Bphy_0670	755495	755698	+	203	CDS		DNA-directed RNA polymerase subunit omega	0	0
Bphy_0671	755774	758158	+	2384	CDS	spoT	(p)ppGpp synthetase I SpoT/RelA	0	0
Bphy_0672	758244	758732	+	488	CDS		hypothetical protein	0	0
Bphy_0673	759177	759749	+	572	CDS		greB ,transcription elongation factor GreB	0	0
Bphy_0674	759858	761003	-	1145	CDS		porin	0	0
Bphy_0675	761527	761769	-	242	CDS		hypothetical protein	0	0
Bphy_0676	762175	762378	+	203	CDS		cold-shock DNA-binding domain-containing protein	0	0
Bphy_0677	762698	763876	+	1178	CDS		DNA polymerase III subunit epsilon	0	0
Bphy_0678	763873	764496	-	623	CDS		chorismate mutase	0	0
Bphy_0679	764799	764948	-	149	CDS		hypothetical protein	0	0
Bphy_0680	765211	765549	+	338	CDS		me "hypothetical protein (pseudogene) ,hypothetical protein (pseudogene)"	0	0
Bphy_0680	765211	765549	+	338	CDS		me "hypothetical protein (pseudogene)"	0	0
Bphy_0681	765960	766211	+	251	CDS		eplicon_xref "NC_010622"	0	0
Bphy_0682	766231	767175	-	944	CDS		LysR family transcriptional regulator	0	0
Bphy_0683	767269	768519	+	1250	CDS		Formyl-CoA transferase	0	0
Bphy_0684	768512	769651	+	1139	CDS		acyl-CoA dehydrogenase domain-containing protein	0	0
Bphy_0685	769912	770928	-	1016	CDS		fructose-1,6-bisphosphatase	0	0
Bphy_0686	771230	774013	-	2783	CDS		pepN ,aminopeptidase N	0	0
Bphy_0687	774129	774830	+	701	CDS		putative transmembrane lipoprotein	0	0
Bphy_0688	774937	775509	-	572	CDS		hypothetical protein	0	0
Bphy_0689	776264	776968	+	704	CDS		hypothetical protein	0	0
Bphy_0690	776952	777746	+	794	CDS		phospholipid/glycerol acyltransferase	0	0
Bphy_0691	777727	778026	+	299	CDS		putative acyl-carrier protein	0	0
Bphy_0692	778023	778280	+	257	CDS		acyl carrier protein	0	0
Bphy_0693	778280	778984	+	704	CDS		hypothetical protein	0	0
Bphy_0694	778981	780669	+	1688	CDS		AMP-dependent synthetase and ligase	0	0
Bphy_0695	780666	782447	+	1781	CDS		glycosyl transferase family protein	0	0
Bphy_0696	782434	784029	+	1595	CDS		histidine ammonia-lyase	0	0
Bphy_0697	784022	784453	+	431	CDS		thioesterase superfamily protein	0	0
Bphy_0698	784441	785109	+	668	CDS		putative signal peptide protein	0	0
Bphy_0699	785106	787526	+	2420	CDS		RND superfamily drug exporter	0	0
Bphy_0700	787523	788704	+	1181	CDS		3-oxoacyl-(acyl carrier protein) synthase I	0	0
Bphy_0701	788739	789221	+	482	CDS		beta-hydroxyacyl-(acyl-carrier-protein) dehydratase FabA/FabZ	0	0
Bphy_0702	789218	789943	+	725	CDS		short chain dehydrogenase	0	0
Bphy_0703	789943	791169	+	1226	CDS		3-oxoacyl-(acyl carrier protein) synthase II	0	0
Bphy_0704	791166	792392	+	1226	CDS		beta-ketoacyl synthase	0	0
Bphy_0705	792436	792864	+	428	CDS		putative signal peptide protein	0	0
Bphy_0706	792892	793323	+	431	CDS		putative excinuclease ATPase subunit	0	0
Bphy_0707	793375	794127	-	752	CDS		type 11 methyltransferase	0	0
Bphy_0708	794248	795498	+	1250	CDS		FAD-binding monooxygenase	0	0
Bphy_0709	795644	796969	-	1325	CDS		guanine deaminase	0	0
Bphy_0710	796999	798039	-	1040	CDS		adenosine deaminase	0	0
Bphy_0711	798144	799154	-	1010	CDS		xanthine dehydrogenase accessory protein XdhC	0	0
Bphy_0712	799248	801704	-	2456	CDS		xanthine dehydrogenase, molybdopterin binding subunit	0	0
Bphy_0713	801704	803242	-	1538	CDS		xanthine dehydrogenase small subunit	0	0
Bphy_0714	803652	804158	-	506	CDS		disulfide bond formation protein B	0	0
Bphy_0715	804264	805652	-	1388	CDS		amidase	0	0
Bphy_0716	805878	807635	+	1757	CDS		sodium/hydrogen exchanger	0	0
Bphy_0717	807792	809231	+	1439	CDS		peptidase C26	0	0
Bphy_0718	809508	810251	+	743	CDS		putative exported lipoprotein	0	0
Bphy_0719	810381	811460	-	1079	CDS		hypothetical protein	0	0
Bphy_0720	811619	812185	-	566	CDS		GCN5-like N-acetyltransferase	0	0
Bphy_0721	812590	813891	+	1301	CDS		general substrate transporter	0	0
Bphy_0722	814002	815849	-	1847	CDS		TPR repeat-containing protein	0	0
Bphy_0723	815960	816340	+	380	CDS		ArsR family transcriptional regulator	0	0
Bphy_0724	816337	817458	+	1121	CDS		cation diffusion facilitator family transporter	0	0
Bphy_0725	817568	819283	+	1715	CDS		FAD-binding monooxygenase	0	0
Bphy_0726	819358	819612	-	254	CDS		NAD-dependent formate dehydrogenase subunit delta	0	0
Bphy_0727	819634	822573	-	2939	CDS		formate dehydrogenase subunit alpha	0	0
Bphy_0728	822588	824144	-	1556	CDS		NADH dehydrogenase (quinone)	0	0
Bphy_0729	824141	824653	-	512	CDS		NAD-dependent formate dehydrogenase subunit gamma	0	0
Bphy_0730	824788	825870	+	1082	CDS		molybdate metabolism transcriptional regulator	0	0
Bphy_0731	826014	826280	+	266	CDS		hypothetical protein	0	0
Bphy_0732	826341	826700	-	359	CDS		hypothetical protein	0	0
Bphy_0733	827086	828213	+	1127	CDS		group 1 glycosyl transferase	0	0
Bphy_0734	828242	828502	-	260	CDS		GP29	0	0
Bphy_0735	829187	829900	-	713	CDS		phosphoglycolate phosphatase	0	0
Bphy_0736	829938	830636	-	698	CDS		3-demethylubiquinone-9 3-methyltransferase	0	0
Bphy_0737	830843	831490	-	647	CDS		OmpA/MotB domain-containing protein	0	0
Bphy_0738	832056	834635	+	2579	CDS		DNA gyrase subunit A	0	0
Bphy_0739	834752	835360	+	608	CDS		hypothetical protein	0	0
Bphy_0740	835573	836655	+	1082	CDS		phosphoserine aminotransferase	0	0
Bphy_0741	836728	837810	+	1082	CDS		chorismate mutase	0	0
Bphy_0742	837889	839004	+	1115	CDS		histidinol-phosphate aminotransferase	0	0
Bphy_0743	839013	840017	+	1004	CDS		prephenate dehydrogenase	0	0
Bphy_0744	840037	841341	+	1304	CDS		3-phosphoshikimate 1-carboxyvinyltransferase	0	0
Bphy_0745	841390	842076	+	686	CDS		cmk ,cytidylate kinase	0	0
Bphy_0746	842190	843959	+	1769	CDS		rpsA ,30S ribosomal protein S1	0	0
Bphy_0747	843982	844305	+	323	CDS		ihfB ,integration host factor subunit beta	0	0
Bphy_0748	844637	844930	+	293	CDS		hypothetical protein	0	0
Bphy_0749	844987	846162	+	1175	CDS		tetratricopeptide repeat-containing protein	0	0
Bphy_0750	846253	847665	+	1412	CDS		nucleotide sugar dehydrogenase	0	0
Bphy_0751	847658	848620	+	962	CDS		rfaE bifunctional protein	0	0
Bphy_0752	848702	849694	+	992	CDS		ADP-L-glycero-D-manno-heptose-6-epimerase	0	0
Bphy_0753	849771	850139	+	368	CDS		hypothetical protein	0	0
Bphy_0754	850444	851346	+	902	CDS	cysM	cysteine synthase B	0	0
Bphy_0755	851438	852826	-	1388	CDS		lytic murein transglycosylase B	0	0
Bphy_0756	852859	853782	+	923	CDS		histone deacetylase superfamily protein	0	0
Bphy_0757	853815	854624	+	809	CDS		enoyl-CoA hydratase	0	0
Bphy_0758	854634	855581	-	947	CDS		alpha/beta hydrolase fold protein	0	0
Bphy_0759	855756	856790	+	1034	CDS		metN ,DL-methionine transporter ATP-binding subunit	0	0
Bphy_0760	856780	857433	+	653	CDS		binding-protein-dependent transport systems inner membrane component	0	0
Bphy_0761	857462	858262	+	800	CDS		YaeC family lipoprotein	0	0
Bphy_0762	858506	859255	+	749	CDS		electron transfer flavoprotein alpha/beta-subunit	0	0
Bphy_0763	859283	860218	+	935	CDS		electron transfer flavoprotein subunit alpha	0	0
Bphy_0764	860321	862111	+	1790	CDS		acyl-CoA dehydrogenase domain-containing protein	0	0
Bphy_0765	862184	863470	-	1286	CDS		D-amino acid dehydrogenase small subunit	0	0
Bphy_0766	863636	864124	+	488	CDS		AsnC family transcriptional regulator	0	0
Bphy_0767	864229	865389	+	1160	CDS		radical SAM domain-containing protein	0	0
Bphy_0768	865412	865945	-	533	CDS		hypothetical protein	0	0
Bphy_0769	866299	866553	+	254	CDS		rpsP ,30S ribosomal protein S16	0	0
Bphy_0770	866650	867345	+	695	CDS		rimM ,16S rRNA-processing protein RimM	0	0
Bphy_0771	867370	868137	+	767	CDS		trmD ,tRNA (guanine-N(1)-)-methyltransferase	0	0
Bphy_0772	868282	868665	+	383	CDS		rplS ,50S ribosomal protein L19	0	0
Bphy_0773	868759	869466	+	707	CDS		NUDIX hydrolase	0	0
Bphy_0775	870657	870944	-	287	CDS		hypothetical protein	0	0
Bphy_0776	870949	871902	-	953	CDS		ribosome-associated GTPase	0	0
Bphy_0777	871899	873158	-	1259	CDS		Ste24 endopeptidase	0	0
Bphy_0778	873247	873870	+	623	CDS		oligoribonuclease	0	0
Bphy_0779	873874	874500	-	626	CDS		mogA ,molybdenum cofactor biosynthesis protein MogA	0	0
Bphy_0780	874481	875062	-	581	CDS		hypothetical protein	0	0
Bphy_0781	875311	876681	+	1370	CDS		peptidase U62 modulator of DNA gyrase	0	0
Bphy_0782	876873	877373	-	500	CDS		dihydrofolate reductase	0	0
Bphy_0783	877513	879000	-	1487	CDS		sigma-54 dependent trancsriptional regulator	0	0
Bphy_0784	879025	879924	-	899	CDS		hypothetical protein	0	0
Bphy_0785	880032	881315	-	1283	CDS		peptidase C39 bacteriocin processing	0	0
Bphy_0786	881922	882398	-	476	CDS		hypothetical protein	0	0
Bphy_0788	884570	885541	+	971	CDS		thyA ,thymidylate synthase	0	0
Bphy_0789	885629	888175	-	2546	CDS		hypothetical protein	0	0
Bphy_0790	888326	889042	-	716	CDS		ArsR family transcriptional regulator	0	0
Bphy_0791	889228	889368	+	140	CDS		hypothetical protein	0	0
Bphy_0792	889502	890761	+	1259	CDS		major facilitator transporter	0	0
Bphy_0793	890793	891884	+	1091	CDS		AraC family transcriptional regulator	0	0
Bphy_0794	891968	892474	+	506	CDS		thioesterase superfamily protein	0	0
Bphy_0795	892538	893938	-	1400	CDS		fumC ,fumarate hydratase	0	0
Bphy_0796	894026	895714	-	1688	CDS		phospholipase D/transphosphatidylase	0	0
Bphy_0797	896124	897515	-	1391	CDS		MATE efflux family protein	0	0
Bphy_0798	897726	897944	-	218	CDS		hypothetical protein	0	0
Bphy_0799	898268	898720	+	452	CDS		putative signal peptide protein	0	0
Bphy_0800	898786	899052	+	266	CDS		hypothetical protein	0	0
Bphy_0801	899172	901424	+	2252	CDS		UvrD/REP helicase	0	0
Bphy_0802	901485	902252	-	767	CDS		hypothetical protein	0	0
Bphy_0803	902482	902805	-	323	CDS		branched-chain amino acid transport	0	0
Bphy_0804	902802	903569	-	767	CDS		AzlC family protein	0	0
Bphy_0805	903682	904509	-	827	CDS		AraC family transcriptional regulator	0	0
Bphy_0806	904552	905055	-	503	CDS		CreA family protein	0	0
Bphy_0807	905529	905852	-	323	CDS		4Fe-4S ferredoxin iron-sulfur binding domain-containing protein	0	0
Bphy_0808	906133	907332	+	1199	CDS		nicotinate phosphoribosyltransferase	0	0
Bphy_0809	907542	908204	+	662	CDS		hypothetical protein	0	0
Bphy_0810	908215	909675	+	1460	CDS		citrate transporter	0	0
Bphy_0811	909730	910719	+	989	CDS		D-isomer specific 2-hydroxyacid dehydrogenase	0	0
Bphy_0812	910716	912200	+	1484	CDS		hypothetical protein	0	0
Bphy_0813	912275	912763	-	488	CDS		GCN5-like N-acetyltransferase	0	0
Bphy_0814	912763	913047	-	284	CDS		hypothetical protein	0	0
Bphy_0815	913101	914396	-	1295	CDS		molybdenum cofactor synthesis domain-containing protein	0	0
Bphy_0816	914478	915092	-	614	CDS		mobA ,molybdopterin-guanine dinucleotide biosynthesis protein MobA	0	0
Bphy_0817	915108	916220	-	1112	CDS		moaA ,molybdenum cofactor biosynthesis protein A	0	0
Bphy_0818	916407	919685	-	3278	CDS		ribonuclease	0	0
Bphy_0819	920449	921510	+	1061	CDS		RluA family pseudouridine synthase	0	0
Bphy_0820	921491	922150	+	659	CDS		HAD family hydrolase	0	0
Bphy_0821	922147	922539	+	392	CDS		Rieske (2Fe-2S) domain-containing protein	0	0
Bphy_0822	922585	923595	+	1010	CDS		peptidase S49	0	0
Bphy_0823	923652	924371	-	719	CDS		uroporphyrin-III C/tetrapyrrole methyltransferase	0	0
Bphy_0824	924368	924988	-	620	CDS		Maf-like protein	0	0
Bphy_0825	925228	925866	+	638	CDS		hypothetical protein	0	0
Bphy_0826	925980	926159	+	179	CDS		50S ribosomal protein L32	0	0
Bphy_0827	926296	927426	+	1130	CDS		putative glycerol-3-phosphate acyltransferase PlsX	0	0
Bphy_0828	927426	928415	+	989	CDS		3-oxoacyl-(acyl carrier protein) synthase III	0	0
Bphy_0829	928509	929441	+	932	CDS		malonyl CoA-acyl carrier protein transacylase	0	0
Bphy_0830	929507	930256	+	749	CDS		fabG ,3-ketoacyl-(acyl-carrier-protein) reductase	0	0
Bphy_0831	930404	930643	+	239	CDS	acpP	acpP ,acyl carrier protein	0	0
Bphy_0832	930949	932235	+	1286	CDS		3-oxoacyl-(acyl carrier protein) synthase II	0	0
Bphy_0833	932348	932731	+	383	CDS		hypothetical protein	0	0
Bphy_0834	932864	933463	+	599	CDS		RNA polymerase sigma factor RpoE	0	0
Bphy_0835	933548	934201	+	653	CDS	rseA	anti sigma-E protein, RseA	0	0
Bphy_0836	934206	935246	+	1040	CDS		sigma E regulatory protein, MucB/RseB	0	0
Bphy_0837	935266	936774	+	1508	CDS		protease Do	0	0
Bphy_0838	936771	937049	+	278	CDS		glutaredoxin 2	0	0
Bphy_0839	937214	939007	+	1793	CDS		GTP-binding protein LepA	0	0
Bphy_0840	939028	939921	+	893	CDS		signal peptidase I	0	0
Bphy_0841	940073	941398	+	1325	CDS		ribonuclease III	0	0
Bphy_0842	941499	942362	+	863	CDS	era	GTP-binding protein Era	0	0
Bphy_0843	942349	943359	+	1010	CDS		recO ,DNA repair protein RecO	0	0
Bphy_0844	943356	944120	+	764	CDS		pyridoxine 5'-phosphate synthase	0	0
Bphy_0845	944144	944551	+	407	CDS	acpS	acpS ,4'-phosphopantetheinyl transferase	0	0
Bphy_0846	944619	945650	+	1031	CDS		beta-hexosaminidase	0	0
Bphy_0847	945728	947110	-	1382	CDS		two component, sigma54 specific, Fis family transcriptional regulator	0	0
Bphy_0848	947234	947440	-	206	CDS		CsbD family protein	0	0
Bphy_0849	947743	948300	-	557	CDS		elongation factor P	0	0
Bphy_0850	948629	949810	-	1181	CDS		hypothetical protein	0	0
Bphy_0851	949920	952142	+	2222	CDS		uvrC ,excinuclease ABC subunit C	0	0
Bphy_0852	952283	952873	+	590	CDS		CDP-diacylglycerol--glycerol-3-phosphate 3-phosphatidyltransferase	0	0
Bphy_0853	952978	953121	-	143	CDS		hypothetical protein	0	0
Bphy_0854	953535	954035	+	500	CDS		GCN5-like N-acetyltransferase	0	0
Bphy_0855	954048	954938	-	890	CDS		putative inner membrane protein	0	0
Bphy_0856	954991	955470	-	479	CDS		hypothetical protein	0	0
Bphy_0857	955488	956114	-	626	CDS		electron transport protein SCO1/SenC	0	0
Bphy_0858	956492	957241	+	749	CDS		HAD family hydrolase	0	0
Bphy_0859	957294	958730	+	1436	CDS		alpha,alpha-trehalose-phosphate synthase	0	0
Bphy_0860	958821	960713	-	1892	CDS		ABC transporter-like protein	0	0
Bphy_0861	961392	962456	+	1064	CDS		group 1 glycosyl transferase	0	0
Bphy_0862	962695	963552	+	857	CDS		hypothetical protein	0	0
Bphy_0863	963631	964089	+	458	CDS		hypothetical protein	0	0
Bphy_0864	964140	966008	-	1868	CDS		hypothetical protein	0	0
Bphy_0865	966005	966394	-	389	CDS		GtrA family protein	0	0
Bphy_0866	966391	967374	-	983	CDS		glycosyl transferase family protein	0	0
Bphy_0867	967768	968517	-	749	CDS		DNA polymerase III subunit epsilon	0	0
Bphy_0868	968586	969032	-	446	CDS		ribonuclease H	0	0
Bphy_0869	969029	969844	-	815	CDS		type 11 methyltransferase	0	0
Bphy_0870	969864	970667	+	803	CDS		hydroxyacylglutathione hydrolase	0	0
Bphy_0871	970823	972508	+	1685	CDS		lytic transglycosylase	0	0
Bphy_0872	972757	974001	+	1244	CDS		major facilitator transporter	0	0
Bphy_0873	974454	975608	+	1154	CDS		carbamoyl phosphate synthase small subunit	0	0
Bphy_0874	975730	978984	+	3254	CDS	carB	carbamoyl phosphate synthase large subunit	0	0
Bphy_0875	979137	979613	+	476	CDS		greA ,transcription elongation factor GreA	0	0
Bphy_0876	979633	980133	+	500	CDS		hypothetical protein	0	0
Bphy_0877	980288	980851	-	563	CDS		hypothetical protein	0	0
Bphy_0878	981120	981782	+	662	CDS		ribosomal RNA methyltransferase RrmJ/FtsJ	0	0
Bphy_0879	981969	983858	+	1889	CDS		ATP-dependent metalloprotease FtsH	0	0
Bphy_0880	984031	984873	+	842	CDS		dihydropteroate synthase	0	0
Bphy_0881	984902	986260	+	1358	CDS		glmM ,phosphoglucosamine mutase	0	0
Bphy_0882	986616	987647	+	1031	CDS		phosphate ABC transporter periplasmic phosphate-binding protein	0	0
Bphy_0883	987797	988795	+	998	CDS		pstC ,phosphate transporter permease subunit PstC	0	0
Bphy_0884	988792	989688	+	896	CDS		pstA ,phosphate transporter permease subunit PtsA	0	0
Bphy_0885	989704	990552	+	848	CDS		pstB ,phosphate transporter ATP-binding protein	0	0
Bphy_0886	990587	991291	+	704	CDS		phosphate uptake regulator PhoU	0	0
Bphy_0887	991355	992056	+	701	CDS		two component transcriptional regulator	0	0
Bphy_0888	992153	993466	+	1313	CDS		multi-sensor signal transduction histidine kinase	0	0
Bphy_0889	993642	995249	-	1607	CDS		Ppx/GppA phosphatase	0	0
Bphy_0891	997972	998787	-	815	CDS		hypothetical protein	0	0
Bphy_0892	998964	999422	-	458	CDS		putative phosphohistidine phosphatase SixA	0	0
Bphy_0893	999831	999989	-	158	CDS		hypothetical protein	0	0
Bphy_0894	1000332	1000505	-	173	CDS		hypothetical protein	0	0
Bphy_0895	1000673	1000846	+	173	CDS		lipoprotein	0	0
Bphy_0896	1000872	1002254	-	1382	CDS		MATE efflux family protein	0	0
Bphy_0897	1002251	1002604	-	353	CDS		hypothetical protein	0	0
Bphy_0898	1003216	1003545	-	329	CDS		lipoprotein	0	0
Bphy_0899	1003734	1004456	-	722	CDS		peptidase M23B	0	0
Bphy_0900	1004573	1005490	-	917	CDS		aldose 1-epimerase	0	0
Bphy_0901	1005530	1005787	+	257	CDS		hypothetical protein	0	0
Bphy_0902	1006000	1006893	+	893	CDS		undecaprenyl pyrophosphate phosphatase	0	0
Bphy_0903	1007365	1007610	-	245	CDS		hypothetical protein	0	0
Bphy_0904	1007901	1008290	+	389	CDS		hypothetical protein	0	0
Bphy_0905	1008287	1008745	+	458	CDS		NUDIX hydrolase	0	0
Bphy_0906	1008771	1009685	-	914	CDS		extracellular solute-binding protein	0	0
Bphy_0907	1009819	1011540	-	1721	CDS		glutaminyl-tRNA synthetase	0	0
Bphy_0908	1011596	1011949	-	353	CDS		hypothetical protein	0	0
Bphy_0909	1012106	1012933	+	827	CDS		RNA polymerase sigma factor	0	0
Bphy_0910	1012923	1013891	+	968	CDS		putative transmembrane anti-sigma factor	0	0
Bphy_0911	1014115	1014489	+	374	CDS		rpsF ,30S ribosomal protein S6	0	0
Bphy_0912	1014555	1014854	+	299	CDS		putative primosomal replication protein N	0	0
Bphy_0913	1014857	1015132	+	275	CDS		rpsR ,30S ribosomal protein S18	0	0
Bphy_0914	1015160	1015612	+	452	CDS		rplI ,50S ribosomal protein L9	0	0
Bphy_0915	1015784	1017172	+	1388	CDS		replicative DNA helicase	0	0
Bphy_0916	1017321	1017947	+	626	CDS		hypothetical protein	0	0
Bphy_0917	1017947	1018957	+	1010	CDS		phosphate transporter	0	0
Bphy_0918	1018980	1019786	-	806	CDS		short-chain dehydrogenase/reductase SDR	0	0
Bphy_0919	1019928	1021076	-	1148	CDS		NLP/P60 protein	0	0
Bphy_0920	1021327	1023147	-	1820	CDS		PhoH family protein	0	0
Bphy_0921	1023513	1023974	-	461	CDS		alkyl hydroperoxide reductase/ Thiol specific antioxidant/ Mal allergen	0	0
Bphy_0922	1024201	1025097	-	896	CDS		polysaccharide deacetylase	0	0
Bphy_0923	1025110	1026156	-	1046	CDS		NAD-dependent epimerase/dehydratase family protein	0	0
Bphy_0924	1026153	1027088	-	935	CDS		putative formyltransferase	0	0
Bphy_0925	1027085	1028134	-	1049	CDS		glycosyl transferase family protein	0	0
Bphy_0926	1028153	1029304	-	1151	CDS		DegT/DnrJ/EryC1/StrS aminotransferase	0	0
Bphy_0927	1029561	1029986	-	425	CDS		hypothetical protein	0	0
Bphy_0928	1029961	1031763	-	1802	CDS		glycosyl transferase family protein	0	0
Bphy_0929	1032158	1032562	-	404	CDS		hypothetical protein	0	0
Bphy_0930	1033030	1034277	+	1247	CDS		aminotransferase AlaT	0	0
Bphy_0931	1034336	1035667	+	1331	CDS		homoserine dehydrogenase	0	0
Bphy_0932	1035698	1037146	+	1448	CDS		threonine synthase	0	0
Bphy_0933	1037419	1038714	+	1295	CDS		molybdenum cofactor synthesis domain-containing protein	0	0
Bphy_0934	1038778	1039035	+	257	CDS		molybdopterin converting factor subunit 1	0	0
Bphy_0935	1039068	1039544	+	476	CDS		molybdopterin biosynthesis MoaE protein	0	0
Bphy_0936	1039653	1040210	-	557	CDS		globin	0	0
Bphy_0937	1040418	1040945	+	527	CDS	trmB	transcriptional regulator, TrmB	0	0
Bphy_0939	1043959	1044402	-	443	CDS		hypothetical protein	0	0
Bphy_0940	1044534	1045094	-	560	CDS		putative DNA uptake protein, ComEA-like protein	0	0
Bphy_0941	1045320	1047677	-	2357	CDS		penicillin-binding protein 1C	0	0
Bphy_0942	1047692	1053754	-	6062	CDS		alpha-2-macroglobulin domain-containing protein	0	0
Bphy_0943	1053918	1054334	+	416	CDS		MerR family transcriptional regulator	0	0
Bphy_0944	1054331	1054729	+	398	CDS		carboxymuconolactone decarboxylase	0	0
Bphy_0945	1055014	1056375	-	1361	CDS		MATE efflux family protein	0	0
Bphy_0946	1056378	1058135	-	1757	CDS		putative inner membrane protein	0	0
Bphy_0947	1058410	1058673	-	263	CDS		rpmE2 ,50S ribosomal protein L31 type B	0	0
Bphy_0948	1058844	1059686	-	842	CDS		hypothetical protein	0	0
Bphy_0949	1059870	1061132	-	1262	CDS		rho ,transcription termination factor Rho	0	0
Bphy_0950	1061421	1061747	-	326	CDS		thioredoxin	0	0
Bphy_0951	1062461	1064842	+	2381	CDS		DNA polymerase III subunits gamma and tau	0	0
Bphy_0952	1064920	1065246	+	326	CDS		hypothetical protein	0	0
Bphy_0953	1065380	1065976	+	596	CDS		recR ,recombination protein RecR	0	0
Bphy_0954	1066040	1067305	+	1265	CDS		L-carnitine dehydratase/bile acid-inducible protein F	0	0
Bphy_0955	1067389	1068426	+	1037	CDS		NMT1/THI5-like domain-containing protein	0	0
Bphy_0956	1068473	1069297	+	824	CDS		ABC transporter-like protein	0	0
Bphy_0957	1069299	1070123	+	824	CDS		binding-protein-dependent transport systems inner membrane component	0	0
Bphy_0958	1070205	1071179	-	974	CDS		alcohol dehydrogenase	0	0
Bphy_0959	1071447	1072205	+	758	CDS		surE ,stationary phase survival protein SurE	0	0
Bphy_0960	1072202	1073185	+	983	CDS		protein-L-isoaspartate O-methyltransferase	0	0
Bphy_0961	1073191	1074129	+	938	CDS		peptidase M23B	0	0
Bphy_0962	1074146	1075240	+	1094	CDS		RNA polymerase sigma factor RpoS	0	0
Bphy_0963	1075247	1076023	+	776	CDS		3'-5' exonuclease	0	0
Bphy_0964	1076162	1077025	-	863	CDS		endonuclease/exonuclease/phosphatase	0	0
Bphy_0965	1077109	1078530	+	1421	CDS		rumA ,23S rRNA 5-methyluridine methyltransferase	0	0
Bphy_0966	1078642	1079499	-	857	CDS		putative competence lipoprotein, ComL	0	0
Bphy_0967	1079539	1080849	+	1310	CDS		RluA family pseudouridine synthase	0	0
Bphy_0968	1080846	1081685	+	839	CDS		hypothetical protein	0	0
Bphy_0969	1082120	1084108	+	1988	CDS		poly(R)-hydroxyalkanoic acid synthase, class I	0	0
Bphy_0971	1085656	1086396	+	740	CDS		acetyacetyl-CoA reductase	0	0
Bphy_0972	1086545	1087123	+	578	CDS		polyhydroxyalkonate synthesis repressor PhaR	0	0
Bphy_0973	1087506	1088897	+	1391	CDS		rimO ,30S ribosomal protein S12 methylthiotransferase	0	0
Bphy_0974	1088902	1089840	+	938	CDS		ribokinase-like domain-containing protein	0	0
Bphy_0975	1090012	1091196	+	1184	CDS		beta-ketothiolase	0	0
Bphy_0976	1091352	1091960	+	608	CDS		hypothetical protein	0	0
Bphy_0977	1092001	1093185	+	1184	CDS		cystathionine beta-lyase	0	0
Bphy_0978	1093273	1094112	-	839	CDS		phosphoserine phosphatase SerB	0	0
Bphy_0979	1094296	1095519	+	1223	CDS		cytochrome P450	0	0
Bphy_0980	1095703	1096677	+	974	CDS		Ku protein	0	0
Bphy_0981	1096745	1099609	+	2864	CDS		DNA ligase D	0	0
Bphy_0982	1099684	1099998	+	314	CDS		hypothetical protein	0	0
Bphy_0983	1100016	1100990	-	974	CDS		LysR family transcriptional regulator	0	0
Bphy_0984	1101155	1102171	+	1016	CDS		zinc-binding alcohol dehydrogenase family protein	0	0
Bphy_0985	1102369	1102929	+	560	CDS		hypothetical protein	0	0
Bphy_0986	1103016	1103822	-	806	CDS		hypothetical protein	0	0
Bphy_0987	1103819	1104559	-	740	CDS		ABC transporter-like protein	0	0
Bphy_0988	1104678	1107110	+	2432	CDS		AsmA family protein	0	0
Bphy_0989	1107250	1107747	-	497	CDS		hypothetical protein	0	0
Bphy_0990	1108222	1109865	+	1643	CDS		integral membrane sensor signal transduction histidine kinase	0	0
Bphy_0991	1110039	1110527	+	488	CDS		response regulator receiver protein	0	0
Bphy_0992	1110609	1112600	+	1991	CDS		PAS/PAC sensor hybrid histidine kinase	0	0
Bphy_0993	1112708	1113157	-	449	CDS		mscL ,large-conductance mechanosensitive channel	0	0
Bphy_0994	1113346	1114368	-	1022	CDS		pyridoxal-5'-phosphate-dependent protein subunit beta	0	0
Bphy_0995	1114435	1115694	-	1259	CDS		acetylornithine deacetylase	0	0
Bphy_0996	1115827	1117005	-	1178	CDS		peptidase dimerisation domain-containing protein	0	0
Bphy_0997	1117010	1120504	-	3494	CDS		transcription-repair coupling factor	0	0
Bphy_0998	1120787	1121497	+	710	CDS		ispD ,2-C-methyl-D-erythritol 4-phosphate cytidylyltransferase	0	0
Bphy_0999	1121567	1122046	+	479	CDS		ispF ,2-C-methyl-D-erythritol 2,4-cyclodiphosphate synthase	0	0
Bphy_1000	1122137	1122661	-	524	CDS		alkylhydroperoxidase	0	0
Bphy_1001	1122737	1123285	-	548	CDS		alkyl hydroperoxide reductase/ Thiol specific antioxidant/ Mal allergen	0	0
Bphy_1002	1123538	1124887	-	1349	CDS		integral membrane sensor signal transduction histidine kinase	0	0
Bphy_1003	1124931	1125665	-	734	CDS		ompR ,osmolarity response regulator	0	0
Bphy_1004	1125895	1126230	+	335	CDS		hypothetical protein	0	0
Bphy_1005	1126329	1127495	+	1166	CDS		hypothetical protein	0	0
Bphy_1006	1127503	1128411	-	908	CDS		squalene/phytoene synthase	0	0
Bphy_1007	1129337	1129594	-	257	CDS		hypothetical protein	0	0
Bphy_1008	1129979	1130434	-	455	CDS		MarR family transcriptional regulator	0	0
Bphy_1009	1130498	1131643	-	1145	CDS		glycerate kinase	0	0
Bphy_1010	1132151	1133497	+	1346	CDS		tig ,trigger factor	0	0
Bphy_1011	1133680	1134339	+	659	CDS	clpP	clpP ,ATP-dependent Clp protease proteolytic subunit	0	0
Bphy_1012	1134547	1135818	+	1271	CDS	clpX	clpX ,ATP-dependent protease ATP-binding subunit ClpX	0	0
Bphy_1013	1136002	1138419	+	2417	CDS		ATP-dependent protease La	0	0
Bphy_1014	1138780	1139052	+	272	CDS		histone family protein DNA-binding protein	0	0
Bphy_1015	1139409	1141337	+	1928	CDS		PpiC-type peptidyl-prolyl cis-trans isomerase	0	0
Bphy_1016	1141451	1141792	-	341	CDS		hypothetical protein	0	0
Bphy_1017	1141937	1142581	-	644	CDS		lysophospholipase	0	0
Bphy_1018	1142673	1143359	+	686	CDS		ABC transporter-like protein	0	0
Bphy_1019	1143453	1145075	-	1622	CDS		pgi ,glucose-6-phosphate isomerase	0	0
Bphy_1020	1145342	1146934	-	1592	CDS		carbohydrate kinase	0	0
Bphy_1021	1147046	1148347	-	1301	CDS		D-amino-acid dehydrogenase	0	0
Bphy_1022	1148831	1152910	+	4079	CDS		phosphoribosylformylglycinamidine synthase	0	0
Bphy_1023	1153203	1153982	-	779	CDS		PpiC-type peptidyl-prolyl cis-trans isomerase	0	0
Bphy_1024	1153993	1154307	-	314	CDS		BolA family protein	0	0
Bphy_1025	1154309	1154839	-	530	CDS		intracellular septation protein A	0	0
Bphy_1026	1155076	1156593	-	1517	CDS		hypothetical protein	0	0
Bphy_1027	1156782	1158464	+	1682	CDS		long-chain-fatty-acid--CoA ligase	0	0
Bphy_1028	1158642	1160726	+	2084	CDS		3-hydroxyacyl-CoA dehydrogenase	0	0
Bphy_1029	1160748	1161374	+	626	CDS		nicotinamidase	0	0
Bphy_1030	1161473	1162651	+	1178	CDS		acetyl-CoA acetyltransferase	0	0
Bphy_1031	1162731	1162949	-	218	CDS		hypothetical protein	0	0
Bphy_1032	1163098	1163877	+	779	CDS		SH3 type 3 domain-containing protein	0	0
Bphy_1033	1163925	1164416	-	491	CDS		water stress/hypersensitive response domain-containing protein	0	0
Bphy_1034	1164573	1165196	+	623	CDS		hypothetical protein	0	0
Bphy_1035	1165245	1165538	-	293	CDS		GYD family protein	0	0
Bphy_1036	1165986	1166459	+	473	CDS		thioesterase superfamily protein	0	0
Bphy_1037	1166520	1167518	+	998	CDS		alcohol dehydrogenase	0	0
Bphy_1038	1167566	1168435	+	869	CDS		hypothetical protein	0	0
Bphy_1039	1168521	1169480	+	959	CDS		alpha/beta hydrolase domain-containing protein	0	0
Bphy_1040	1169504	1170325	-	821	CDS		hypothetical protein	0	0
Bphy_1041	1170425	1171474	-	1049	CDS		putative glycine cleavage T protein (aminomethyltransferase)	0	0
Bphy_1042	1171552	1172562	+	1010	CDS		aminodeoxychorismate lyase	0	0
Bphy_1043	1172562	1173182	+	620	CDS		tmk ,thymidylate kinase	0	0
Bphy_1044	1173278	1174327	+	1049	CDS		DNA polymerase III subunit delta'	0	0
Bphy_1045	1174381	1175172	+	791	CDS		TatD family hydrolase	0	0
Bphy_1046	1175224	1175997	+	773	CDS		ankyrin	0	0
Bphy_1047	1176115	1176471	+	356	CDS		hypothetical protein	0	0
Bphy_1048	1176723	1178162	+	1439	CDS		alpha,alpha-trehalose-phosphate synthase	0	0
Bphy_1049	1178188	1178442	+	254	CDS		hypothetical protein	0	0
Bphy_1050	1178682	1179752	+	1070	CDS		group 1 glycosyl transferase	0	0
Bphy_1051	1179991	1180578	-	587	CDS		putative lipoprotein	0	0
Bphy_1052	1180975	1181421	-	446	CDS		putative transmembrane protein	0	0
Bphy_1053	1181730	1182026	-	296	CDS		PsiF repeat-containing protein	0	0
Bphy_1054	1182314	1182610	+	296	CDS		YciI-like protein	0	0
Bphy_1055	1183125	1184441	+	1316	CDS		putative transposase A-like protein	0	0
Bphy_1056	1184705	1186222	-	1517	CDS		mannose-1-phosphate guanylyltransferase/mannose-6-phosphate isomerase	0	0
Bphy_1058	1188289	1189719	+	1430	CDS		nucleotide sugar dehydrogenase	0	0
Bphy_1059	1189757	1190218	+	461	CDS		protein tyrosine phosphatase	0	0
Bphy_1060	1190212	1191393	+	1181	CDS		polysaccharide export protein	0	0
Bphy_1061	1191585	1193777	+	2192	CDS		exopolysaccharide tyrosine-protein kinase	0	0
Bphy_1062	1193843	1194799	+	956	CDS		glycosyl transferase family protein	0	0
Bphy_1063	1194796	1195968	+	1172	CDS		putative glycosyltransferase group 1, RfaG-like protein	0	0
Bphy_1064	1195972	1197432	+	1460	CDS		putative transmembrane protein	0	0
Bphy_1065	1197433	1198668	+	1235	CDS		group 1 glycosyl transferase	0	0
Bphy_1066	1198720	1199877	+	1157	CDS		group 1 glycosyl transferase	0	0
Bphy_1067	1200203	1200463	+	260	CDS		XRE family transcriptional regulator	0	0
Bphy_1068	1200463	1201824	+	1361	CDS		HipA domain-containing protein	0	0
Bphy_1069	1201886	1202929	-	1043	CDS		GDP-mannose 4,6-dehydratase	0	0
Bphy_1070	1202926	1203705	-	779	CDS		GDSL family lipase	0	0
Bphy_1071	1203717	1204817	-	1100	CDS		acyltransferase 3	0	0
Bphy_1072	1205294	1207579	+	2285	CDS		hypothetical protein	0	0
Bphy_1073	1207599	1209077	+	1478	CDS		polysaccharide biosynthesis protein	0	0
Bphy_1074	1209074	1211560	+	2486	CDS		group 1 glycosyl transferase	0	0
Bphy_1075	1211640	1212830	-	1190	CDS		acyltransferase 3	0	0
Bphy_1076	1213088	1213234	+	146	CDS		hypothetical protein	0	0
Bphy_1077	1213480	1214382	+	902	CDS		UTP-glucose-1-phosphate uridylyltransferase	0	0
Bphy_1078	1214459	1215127	-	668	CDS		phosphoribosyltransferase	0	0
Bphy_1079	1215161	1215931	-	770	CDS		IclR family transcriptional regulator	0	0
Bphy_1080	1216318	1217163	+	845	CDS		hypothetical protein	0	0
Bphy_1081	1217200	1219086	+	1886	CDS		4-hydroxyphenylpyruvate dioxygenase	0	0
Bphy_1082	1219304	1220521	+	1217	CDS		porin	0	0
Bphy_1083	1220856	1221512	+	656	CDS		ProQ activator of osmoprotectant transporter ProP	0	0
Bphy_1084	1221727	1223211	+	1484	CDS		integrase catalytic subunit	0	0
Bphy_1085	1223482	1224726	-	1244	CDS		hypothetical protein	0	0
Bphy_1086	1224958	1225560	-	602	CDS		hypothetical protein	0	0
Bphy_1087	1226266	1227153	-	887	CDS		hypothetical protein	0	0
Bphy_1088	1227658	1228515	+	857	CDS		hypothetical protein	0	0
Bphy_1089	1228794	1230275	+	1481	CDS		arginine/ornithine antiporter	0	0
Bphy_1090	1230289	1231548	+	1259	CDS		arginine deiminase	0	0
Bphy_1091	1231662	1232675	-	1013	CDS		hypothetical protein	0	0
Bphy_1092	1233043	1234524	-	1481	CDS		PAS/PAC sensor signal transduction histidine kinase	0	0
Bphy_1093	1234622	1234885	-	263	CDS		hypothetical protein	0	0
Bphy_1094	1235005	1235697	-	692	CDS		signal-transduction protein	0	0
Bphy_1095	1236267	1237094	+	827	CDS		hypothetical protein	0	0
Bphy_1096	1237292	1237558	+	266	CDS		hypothetical protein	0	0
Bphy_1097	1237691	1240363	+	2672	CDS		magnesium-translocating P-type ATPase	0	0
Bphy_1098	1240373	1241377	-	1004	CDS		1-phosphofructokinase	0	0
Bphy_1099	1241387	1243831	-	2444	CDS		phosphoenolpyruvate synthase	0	0
Bphy_1100	1243874	1244344	-	470	CDS		hypothetical protein	0	0
Bphy_1101	1244399	1245049	-	650	CDS		transport-associated	0	0
Bphy_1102	1245275	1246234	+	959	CDS		UspA domain-containing protein	0	0
Bphy_1103	1246429	1248897	-	2468	CDS		HAD superfamily P-type ATPase	0	0
Bphy_1104	1248884	1249375	-	491	CDS		putative signal peptide exported protein	0	0
Bphy_1105	1249721	1251085	+	1364	CDS		beta-lactamase domain-containing protein	0	0
Bphy_1106	1251132	1252988	-	1856	CDS		poly-beta-hydroxybutyrate polymerase domain-containing protein	0	0
Bphy_1107	1253088	1253327	-	239	CDS		hypothetical protein	0	0
Bphy_1108	1253390	1254040	-	650	CDS		transport-associated	0	0
Bphy_1109	1254262	1255011	+	749	CDS		hypothetical protein	0	0
Bphy_1110	1255236	1255673	-	437	CDS		heat shock protein Hsp20	0	0
Bphy_1111	1255794	1256474	-	680	CDS		transport-associated	0	0
Bphy_1112	1256664	1258625	-	1961	CDS		ATP-dependent metalloprotease FtsH	0	0
Bphy_1113	1258806	1260428	+	1622	CDS		chaperonin GroEL	0	0
Bphy_1114	1260671	1261966	+	1295	CDS		polyhydroxyalkanoate depolymerase, intracellular	0	0
Bphy_1115	1261963	1263702	+	1739	CDS		hypothetical protein	0	0
Bphy_1116	1263641	1263916	-	275	CDS		hypothetical protein	0	0
Bphy_1117	1264221	1264691	-	470	CDS		UspA domain-containing protein	0	0
Bphy_1118	1264941	1265396	+	455	CDS		hypothetical protein	0	0
Bphy_1119	1265410	1266249	-	839	CDS		Ion transport 2 domain-containing protein	0	0
Bphy_1120	1266429	1266677	-	248	CDS		hypothetical protein	0	0
Bphy_1121	1267026	1267907	-	881	CDS		H+transporting two-sector ATPase subunit gamma	0	0
Bphy_1122	1267888	1269465	-	1577	CDS		ATP synthase F1 subunit alpha	0	0
Bphy_1123	1269452	1270195	-	743	CDS		H+transporting two-sector ATPase B/B' subunit	0	0
Bphy_1124	1270203	1270448	-	245	CDS		F0F1 ATP synthase subunit C	0	0
Bphy_1125	1270445	1271140	-	695	CDS		F0F1 ATP synthase subunit A	0	0
Bphy_1126	1271137	1271430	-	293	CDS		hypothetical protein	0	0
Bphy_1127	1271423	1271737	-	314	CDS		F0F1-ATPase subunit	0	0
Bphy_1128	1271734	1272165	-	431	CDS		F0F1 ATP synthase subunit epsilon	0	0
Bphy_1129	1272179	1273648	-	1469	CDS		F0F1 ATP synthase subunit beta	0	0
Bphy_1130	1273866	1274480	+	614	CDS		LemA family protein	0	0
Bphy_1131	1274718	1275464	-	746	CDS		acetoacetyl-CoA reductase	0	0
Bphy_1132	1275466	1275711	-	245	CDS		hypothetical protein	0	0
Bphy_1133	1275922	1276761	+	839	CDS		UspA domain-containing protein	0	0
Bphy_1134	1276778	1277281	+	503	CDS		UspA domain-containing protein	0	0
Bphy_1135	1277278	1278111	+	833	CDS		UspA domain-containing protein	0	0
Bphy_1136	1278294	1278740	-	446	CDS		UspA domain-containing protein	0	0
Bphy_1137	1279121	1279765	+	644	CDS		two component LuxR family transcriptional regulator	0	0
Bphy_1138	1279935	1280717	+	782	CDS		Crp/FNR family transcriptional regulator	0	0
Bphy_1139	1280885	1281916	+	1031	CDS		hypothetical protein	0	0
Bphy_1140	1281952	1282296	+	344	CDS		cytochrome c family protein	0	0
Bphy_1141	1282340	1282708	+	368	CDS		hypothetical protein	0	0
Bphy_1142	1282735	1283055	-	320	CDS		hypothetical protein	0	0
Bphy_1143	1283440	1284948	+	1508	CDS		PAS/PAC sensor signal transduction histidine kinase	0	0
Bphy_1144	1284958	1285410	+	452	CDS		response regulator receiver protein	0	0
Bphy_1145	1285407	1286879	+	1472	CDS		multi-sensor signal transduction histidine kinase	0	0
Bphy_1146	1287091	1287567	+	476	CDS		CreA family protein	0	0
Bphy_1147	1287610	1287900	-	290	CDS		hypothetical protein	0	0
Bphy_1148	1288145	1288939	-	794	CDS		ABC transporter-like protein	0	0
Bphy_1149	1288939	1289937	-	998	CDS		monosaccharide-transporting ATPase	0	0
Bphy_1150	1289934	1291013	-	1079	CDS		ABC-type sugar transport system periplasmic component-like protein	0	0
Bphy_1151	1291362	1291826	-	464	CDS		hypothetical protein	0	0
Bphy_1152	1291911	1292918	-	1007	CDS		RpiR family transcriptional regulator	0	0
Bphy_1153	1292875	1293942	-	1067	CDS		peptidase C45 acyl-coenzyme A:6-aminopenicillanic acid acyl-transferase	0	0
Bphy_1154	1293953	1294693	-	740	CDS		glnQ ,glutamine ABC transporter ATP-binding protein	0	0
Bphy_1155	1294690	1295346	-	656	CDS		glnP ,glutamine ABC transporter permease	0	0
Bphy_1156	1295373	1296119	-	746	CDS		glnH ,glutamine ABC transporter periplasmic protein	0	0
Bphy_1157	1296503	1297642	-	1139	CDS		porin	0	0
Bphy_1158	1298069	1298974	-	905	CDS		LysR family transcriptional regulator	0	0
Bphy_1159	1299110	1300531	+	1421	CDS		hypothetical protein	0	0
Bphy_1160	1300542	1301864	+	1322	CDS		major facilitator transporter	0	0
Bphy_1161	1301894	1302964	+	1070	CDS		beta-lactamase	0	0
Bphy_1162	1302990	1304087	-	1097	CDS		hypothetical protein	0	0
Bphy_1163	1304185	1304406	-	221	CDS		hypothetical protein	0	0
Bphy_1164	1304606	1305508	-	902	CDS		beta-lactamase	0	0
Bphy_1165	1305606	1306508	+	902	CDS		LysR family transcriptional regulator	0	0
Bphy_1166	1306536	1308038	-	1502	CDS		major facilitator transporter	0	0
Bphy_1167	1308206	1310440	-	2234	CDS		DEAD/DEAH box helicase domain-containing protein	0	0
Bphy_1168	1310412	1311722	-	1310	CDS		hypothetical protein	0	0
Bphy_1169	1311719	1314067	-	2348	CDS		hypothetical protein	0	0
Bphy_1170	1314676	1315800	-	1124	CDS		transporter DMT superfamily protein	0	0
Bphy_1171	1315797	1317080	-	1283	CDS		class III aminotransferase	0	0
Bphy_1172	1317070	1318566	-	1496	CDS		hypothetical protein	0	0
Bphy_1173	1318575	1319573	-	998	CDS		hypothetical protein	0	0
Bphy_1174	1319570	1320556	-	986	CDS		hypothetical protein	0	0
Bphy_1175	1321540	1322946	+	1406	CDS		transcriptional regulator	0	0
Bphy_1176	1323026	1323730	-	704	CDS		carbonate dehydratase	0	0
Bphy_1177	1324265	1325320	-	1055	CDS		hypothetical protein	0	0
Bphy_1178	1325342	1326193	-	851	CDS		hopanoid biosynthesis associated protein HpnK	0	0
Bphy_1179	1326190	1327614	-	1424	CDS		hopanoid biosynthesis associated radical SAM protein HpnJ	0	0
Bphy_1180	1327667	1328887	-	1220	CDS		hopanoid biosynthesis associated glycosyl transferase protein HpnI	0	0
Bphy_1181	1328971	1329330	-	359	CDS		hypothetical protein	0	0
Bphy_1182	1329532	1330071	-	539	CDS		cytochrome B561	0	0
Bphy_1183	1330243	1330929	+	686	CDS		two component transcriptional regulator	0	0
Bphy_1184	1330926	1332368	+	1442	CDS		integral membrane sensor signal transduction histidine kinase	0	0
Bphy_1185	1332595	1332801	+	206	CDS		hypothetical protein	0	0
Bphy_1186	1333297	1333749	-	452	CDS		nuclear protein SET	0	0
Bphy_1187	1333890	1334780	-	890	CDS		Nitrilase/cyanide hydratase and apolipoprotein N-acyltransferase	0	0
Bphy_1188	1334879	1335775	+	896	CDS		LysR family transcriptional regulator	0	0
Bphy_1189	1335765	1337120	-	1355	CDS		integral membrane sensor signal transduction histidine kinase	0	0
Bphy_1190	1337117	1337863	-	746	CDS		two component transcriptional regulator	0	0
Bphy_1191	1337899	1338270	-	371	CDS		glutathione-dependent formaldehyde-activating protein	0	0
Bphy_1192	1338299	1338580	-	281	CDS		hypothetical protein	0	0
Bphy_1193	1338799	1339863	-	1064	CDS		diguanylate phosphodiesterase	0	0
Bphy_1194	1340043	1340366	+	323	CDS		hypothetical protein	0	0
Bphy_1195	1340440	1340781	-	341	CDS		hypothetical protein	0	0
Bphy_1196	1340999	1342072	+	1073	CDS		me "catalase (pseudogene) ,catalase (pseudogene)"	0	0
Bphy_1196	1340999	1342072	+	1073	CDS		me "catalase (pseudogene)"	0	0
Bphy_1197	1342085	1342625	+	540	CDS		me "cytochrome B561 (pseudogene) ,cytochrome B561 (pseudogene)"	0	0
Bphy_1197	1342085	1342625	+	540	CDS		me "cytochrome B561 (pseudogene)"	0	0
Bphy_1198	1342904	1344370	-	1466	CDS		xylulokinase	0	0
Bphy_1199	1344771	1344992	+	221	CDS		eplicon_xref "NC_010622"	0	0
Bphy_1200	1350990	1352912	-	1922	CDS		hypothetical protein	0	0
Bphy_1201	1353832	1354809	+	977	CDS		hypothetical protein	0	0
Bphy_1202	1355000	1356724	+	1724	CDS		Pyrrolo-quinoline quinone	0	0
Bphy_1203	1356959	1357534	+	575	CDS		hypothetical protein	0	0
Bphy_1204	1357731	1358711	+	980	CDS		quinone oxidoreductase	0	0
Bphy_1205	1358846	1358986	+	140	CDS		eplicon_xref "NC_010622"	0	0
Bphy_1206	1358986	1359159	+	173	CDS		eplicon_xref "NC_010622"	0	0
Bphy_1207	1359317	1359604	+	287	CDS		hypothetical protein	0	0
Bphy_1208	1359745	1360290	-	545	CDS		hypothetical protein	0	0
Bphy_1209	1360386	1361033	-	647	CDS		heat shock protein DnaJ domain-containing protein	0	0
Bphy_1210	1361207	1362115	+	908	CDS		putative transport protein	0	0
Bphy_1211	1362390	1363904	+	1514	CDS		hypothetical protein	0	0
Bphy_1212	1364055	1364822	+	767	CDS		hypothetical protein	0	0
Bphy_1213	1364803	1365120	+	317	CDS		high potential iron-sulfur protein	0	0
Bphy_1214	1365257	1365922	+	665	CDS		hypothetical protein	0	0
Bphy_1215	1365950	1366303	+	353	CDS		hypothetical protein	0	0
Bphy_1216	1366336	1367598	-	1262	CDS		phospholipase D/transphosphatidylase	0	0
Bphy_1217	1367681	1367944	-	263	CDS		hypothetical protein	0	0
Bphy_1218	1368002	1368238	+	236	CDS		eplicon_xref "NC_010622"	0	0
Bphy_1219	1368254	1368466	-	212	CDS		hypothetical protein	0	0
Bphy_1220	1368828	1369745	-	917	CDS		mechanosensitive ion channel MscS	0	0
Bphy_1221	1369960	1371315	+	1355	CDS		major facilitator transporter	0	0
Bphy_1222	1371436	1371900	+	464	CDS		hypothetical protein	0	0
Bphy_1223	1371919	1372149	-	230	CDS		hypothetical protein	0	0
Bphy_1224	1372265	1372453	+	188	CDS		hypothetical protein	0	0
Bphy_1225	1372697	1373674	+	977	CDS		glycosyl transferase family protein	0	0
Bphy_1226	1373764	1375059	-	1295	CDS		major facilitator superfamily metabolite/H(+) symporter	0	0
Bphy_1227	1375394	1377130	-	1736	CDS		SpoVR family protein	0	0
Bphy_1230	1380713	1381138	+	425	CDS		hypothetical protein	0	0
Bphy_1231	1381332	1382093	-	761	CDS		putative hydratase/decarboxylase	0	0
Bphy_1232	1382441	1384228	-	1787	CDS		methyl-accepting chemotaxis sensory transducer	0	0
Bphy_1234	1385485	1386516	-	1031	CDS		LacI family transcription regulator	0	0
Bphy_1235	1386639	1387670	-	1031	CDS		monosaccharide-transporting ATPase	0	0
Bphy_1237	1389569	1390525	-	956	CDS		periplasmic binding protein/LacI transcriptional regulator	0	0
Bphy_1238	1391053	1391691	+	638	CDS		lysine exporter protein LysE/YggA	0	0
Bphy_1239	1391740	1392717	-	977	CDS		magnesium and cobalt transport protein CorA	0	0
Bphy_1240	1392906	1393184	-	278	CDS		hypothetical protein	0	0
Bphy_1241	1393503	1393691	-	188	CDS		hypothetical protein	0	0
Bphy_1242	1393894	1394562	+	668	CDS		hypothetical protein	0	0
Bphy_1243	1394714	1395811	-	1097	CDS		saccharopine dehydrogenase	0	0
Bphy_1244	1396036	1396494	-	458	CDS		AsnC family transcriptional regulator	0	0
Bphy_1245	1396645	1397511	-	866	CDS		LysR family transcriptional regulator	0	0
Bphy_1246	1397681	1398196	+	515	CDS		hypothetical protein	0	0
Bphy_1247	1398366	1398803	+	437	CDS		hypothetical protein	0	0
Bphy_1248	1398829	1399194	-	365	CDS		hypothetical protein	0	0
Bphy_1249	1399244	1400047	-	803	CDS		putative transmembrane lipoprotein	0	0
Bphy_1250	1400125	1401195	-	1070	CDS		LacI family transcription regulator	0	0
Bphy_1251	1401192	1402160	-	968	CDS		D-isomer specific 2-hydroxyacid dehydrogenase	0	0
Bphy_1252	1402165	1403439	-	1274	CDS		major facilitator transporter	0	0
Bphy_1253	1403574	1404536	-	962	CDS		ribokinase-like domain-containing protein	0	0
Bphy_1254	1404574	1405338	-	764	CDS		xylose isomerase domain-containing protein	0	0
Bphy_1255	1405469	1406383	-	914	CDS		LysR family transcriptional regulator	0	0
Bphy_1256	1406503	1407588	+	1085	CDS		hypothetical protein	0	0
Bphy_1257	1407757	1408494	+	737	CDS		glutathione S-transferase domain-containing protein	0	0
Bphy_1258	1408632	1410365	+	1733	CDS		putative voltage-gated ClC-type chloride channel ClcB	0	0
Bphy_1259	1410547	1411884	+	1337	CDS		hypothetical protein	0	0
Bphy_1260	1412214	1412465	+	251	CDS		hypothetical protein	0	0
Bphy_1261	1412553	1412783	+	230	CDS		hypothetical protein	0	0
Bphy_1262	1412809	1413681	+	872	CDS		AraC family transcriptional regulator	0	0
Bphy_1263	1413773	1414147	+	374	CDS		cupin 2 domain-containing protein	0	0
Bphy_1264	1414172	1414792	-	620	CDS		TetR family transcriptional regulator	0	0
Bphy_1265	1415016	1416206	+	1190	CDS		RND family efflux transporter MFP subunit	0	0
Bphy_1266	1416203	1419325	+	3122	CDS		acriflavin resistance protein	0	0
Bphy_1267	1419328	1420821	+	1493	CDS		RND efflux system outer membrane lipoprotein	0	0
Bphy_1268	1421150	1423510	-	2360	CDS		1A family penicillin-binding protein	0	0
Bphy_1269	1424311	1424976	+	665	CDS		hypothetical protein	0	0
Bphy_1270	1425521	1426201	+	680	CDS		phage shock protein A	0	0
Bphy_1271	1426290	1427513	+	1223	CDS		TPR repeat-containing protein	0	0
Bphy_1272	1427610	1428290	-	680	CDS		TetR family transcriptional regulator	0	0
Bphy_1273	1428453	1429934	+	1481	CDS		putative flavin-binding monooxygenase-like protein	0	0
Bphy_1274	1430237	1430353	-	116	CDS		hypothetical protein	0	0
Bphy_1275	1430631	1432043	+	1412	CDS		methyl-accepting chemotaxis sensory transducer	0	0
Bphy_1276	1432131	1432949	-	818	CDS		ornithine carbamoyltransferase	0	0
Bphy_1277	1432949	1433878	-	929	CDS		binding-protein-dependent transport systems inner membrane component	0	0
Bphy_1278	1433875	1435038	-	1163	CDS		spermidine/putrescine ABC transporter ATPase	0	0
Bphy_1279	1435143	1436243	-	1100	CDS		extracellular solute-binding protein	0	0
Bphy_1280	1436736	1438082	+	1346	CDS		Mn2+/Fe2+ transporter	0	0
Bphy_1281	1438199	1438402	+	203	CDS		hypothetical protein	0	0
Bphy_1282	1438531	1439178	-	647	CDS		OmpW family protein	0	0
Bphy_1283	1439272	1440462	-	1190	CDS		2-nitropropane dioxygenase	0	0
Bphy_1284	1440649	1442085	-	1436	CDS		aldehyde dehydrogenase	0	0
Bphy_1285	1442253	1443845	-	1592	CDS		ABC transporter-like protein	0	0
Bphy_1286	1443941	1444834	-	893	CDS		2-hydroxy-3-oxopropionate reductase	0	0
Bphy_1287	1445017	1445226	+	209	CDS		hypothetical protein	0	0
Bphy_1288	1445431	1446525	-	1094	CDS		basic membrane lipoprotein	0	0
Bphy_1289	1446588	1447517	-	929	CDS		inner-membrane translocator	0	0
Bphy_1290	1447549	1448601	-	1052	CDS		inner-membrane translocator	0	0
Bphy_1291	1448705	1450324	-	1619	CDS		me "ABC transporter (pseudogene) ,ABC transporter (pseudogene)"	0	0
Bphy_1291	1448705	1450324	-	1619	CDS		me "ABC transporter (pseudogene)"	0	0
Bphy_1293	1451620	1453029	-	1409	CDS		hydroxydechloroatrazine ethylaminohydrolase	0	0
Bphy_1294	1453650	1454003	+	353	CDS		hydroxyisourate hydrolase	0	0
Bphy_1295	1454234	1455424	+	1190	CDS		hypothetical protein	0	0
Bphy_1296	1455748	1456041	+	293	CDS		eplicon_xref "NC_010622"	0	0
Bphy_1297	1456048	1456557	-	509	CDS		ureidoglycolate hydrolase	0	0
Bphy_1298	1456554	1457567	-	1013	CDS		allantoicase	0	0
Bphy_1299	1457656	1458177	-	521	CDS		hypothetical protein	0	0
Bphy_1300	1458174	1459127	-	953	CDS		urate catabolism protein	0	0
Bphy_1301	1459273	1460130	-	857	CDS		Asp/Glu/hydantoin racemase	0	0
Bphy_1302	1460173	1461669	-	1496	CDS		cytosine/purines uracil, thiamine, allantoin permease	0	0
Bphy_1303	1462052	1462768	-	716	CDS		GntR family transcriptional regulator	0	0
Bphy_1304	1463094	1464020	-	926	CDS		ldcA ,L,D-carboxypeptidase A	0	0
Bphy_1305	1464034	1464675	-	641	CDS		zinc-binding CMP/dCMP deaminase	0	0
Bphy_1306	1464672	1465073	-	401	CDS		hypothetical protein	0	0
Bphy_1307	1465166	1465480	+	314	CDS		hypothetical protein	0	0
Bphy_1308	1465635	1466288	+	653	CDS		17 kDa surface antigen	0	0
Bphy_1309	1466731	1468002	+	1271	CDS		radical SAM domain-containing protein	0	0
Bphy_1310	1468019	1469491	+	1472	CDS		phage SPO1 DNA polymerase-like protein	0	0
Bphy_1311	1469516	1470055	+	539	CDS		GCN5-like N-acetyltransferase	0	0
Bphy_1312	1470105	1471688	-	1583	CDS		guaA ,GMP synthase	0	0
Bphy_1313	1471901	1472725	-	824	CDS		hypothetical protein	0	0
Bphy_1314	1472732	1474192	-	1460	CDS		inosine 5'-monophosphate dehydrogenase	0	0
Bphy_1315	1474486	1475460	+	974	CDS		hypothetical protein	0	0
Bphy_1316	1475565	1475897	-	332	CDS		hypothetical protein	0	0
Bphy_1317	1475894	1476283	-	389	CDS		cyclase/dehydrase	0	0
Bphy_1318	1476463	1476909	+	446	CDS		smpB ,SsrA-binding protein	0	0
Bphy_1319	1476948	1477880	-	932	CDS		hypothetical protein	0	0
Bphy_1320	1477971	1478423	-	452	CDS		hypothetical protein	0	0
Bphy_1321	1478543	1480948	-	2405	CDS		phosphoenolpyruvate synthase	0	0
Bphy_1322	1481326	1482159	+	833	CDS		hypothetical protein	0	0
Bphy_1323	1482185	1482985	-	800	CDS		tRNA/rRNA methyltransferase SpoU	0	0
Bphy_1324	1483053	1483802	-	749	CDS		rnhB ,ribonuclease HII	0	0
Bphy_1325	1483799	1484968	-	1169	CDS		lpxB ,lipid-A-disaccharide synthase	0	0
Bphy_1326	1484972	1485760	-	788	CDS		UDP-N-acetylglucosamine acyltransferase	0	0
Bphy_1327	1485929	1486390	-	461	CDS		fabZ ,(3R)-hydroxymyristoyl-ACP dehydratase	0	0
Bphy_1328	1486560	1487636	-	1076	CDS		lpxD ,UDP-3-O-[3-hydroxymyristoyl] glucosamine N-acyltransferase	0	0
Bphy_1329	1487737	1488273	-	536	CDS		outer membrane chaperone Skp	0	0
Bphy_1330	1488315	1490627	-	2312	CDS		outer membrane protein assembly complex, YaeT protein	0	0
Bphy_1331	1490693	1492081	-	1388	CDS		membrane-associated zinc metalloprotease	0	0
Bphy_1332	1492089	1493294	-	1205	CDS		1-deoxy-D-xylulose 5-phosphate reductoisomerase	0	0
Bphy_1333	1493317	1494138	-	821	CDS		phosphatidate cytidylyltransferase	0	0
Bphy_1334	1494132	1494914	-	782	CDS		undecaprenyl diphosphate synthase	0	0
Bphy_1335	1494986	1495546	-	560	CDS		frr ,ribosome recycling factor	0	0
Bphy_1336	1495639	1496352	-	713	CDS		pyrH ,uridylate kinase	0	0
Bphy_1337	1496596	1497477	-	881	CDS		tsf ,elongation factor Ts	0	0
Bphy_1338	1497671	1498423	-	752	CDS		rpsB ,30S ribosomal protein S2	0	0
Bphy_1339	1498842	1499654	+	812	CDS		methionine aminopeptidase	0	0
Bphy_1340	1499680	1502259	+	2579	CDS		PII uridylyl-transferase	0	0
Bphy_1341	1502266	1504140	+	1874	CDS		RNA-binding S4 domain-containing protein	0	0
Bphy_1342	1504214	1504747	-	533	CDS		peptide deformylase	0	0
Bphy_1343	1504744	1506795	-	2051	CDS		DNA ligase, NAD-dependent	0	0
Bphy_1344	1507047	1507877	+	830	CDS		hypothetical protein	0	0
Bphy_1345	1508022	1509257	-	1235	CDS		FtsZ-binding protein ZipA	0	0
Bphy_1346	1509438	1512956	-	3518	CDS		chromosome segregation protein SMC	0	0
Bphy_1347	1513123	1514124	-	1001	CDS		hypothetical protein	0	0
Bphy_1348	1514417	1515721	+	1304	CDS		succinyldiaminopimelate transaminase	0	0
Bphy_1349	1515816	1516643	+	827	CDS	dapD	2,3,4,5-tetrahydropyridine-2,6-carboxylate N-succinyltransferase	0	0
Bphy_1350	1516643	1517014	+	371	CDS		arsenate reductase and related	0	0
Bphy_1351	1517107	1518246	+	1139	CDS		succinyl-diaminopimelate desuccinylase	0	0
Bphy_1352	1518262	1519149	+	887	CDS		N5-glutamine S-adenosyl-L-methionine-dependent methyltransferase	0	0
Bphy_1353	1519465	1520901	+	1436	CDS		cls ,cardiolipin synthetase	0	0
Bphy_1354	1520908	1521396	-	488	CDS		glutathione peroxidase	0	0
Bphy_1355	1521523	1523463	+	1940	CDS		ABC transporter-like protein	0	0
Bphy_1356	1523520	1524608	+	1088	CDS		L-carnitine dehydratase/bile acid-inducible protein F	0	0
Bphy_1357	1524645	1524908	-	263	CDS		hypothetical protein	0	0
Bphy_1358	1525048	1526424	-	1376	CDS		DNA repair protein RadA	0	0
Bphy_1359	1526499	1527590	-	1091	CDS	alr	alanine racemase	0	0
Bphy_1360	1527789	1529096	+	1307	CDS		lysophospholipid transporter LplT	0	0
Bphy_1361	1529176	1529982	+	806	CDS		phosphomethylpyrimidine kinase	0	0
Bphy_1362	1530011	1531027	-	1016	CDS		hypothetical protein	0	0
Bphy_1363	1531024	1532049	-	1025	CDS		phage SPO1 DNA polymerase-like protein	0	0
Bphy_1364	1532036	1532530	-	494	CDS		ribosomal-protein-alanine acetyltransferase	0	0
Bphy_1365	1532527	1533366	-	839	CDS		peptidase M22 glycoprotease	0	0
Bphy_1366	1533536	1533805	+	269	CDS		acyl-CoA-binding protein	0	0
Bphy_1367	1534250	1535920	+	1670	CDS		DEAD/DEAH box helicase domain-containing protein	0	0
Bphy_1368	1536281	1537585	+	1304	CDS		isocitrate lyase	0	0
Bphy_1369	1537709	1538143	-	434	CDS		UspA domain-containing protein	0	0
Bphy_1370	1538381	1539283	-	902	CDS		LysR family transcriptional regulator	0	0
Bphy_1371	1539438	1540226	+	788	CDS		type II haloacid dehalogenase	0	0
Bphy_1372	1540300	1541892	+	1592	CDS		malate synthase	0	0
Bphy_1373	1542050	1542457	-	407	CDS		AIG2 family protein	0	0
Bphy_1374	1542510	1543004	-	494	CDS		ribonuclease activity regulator protein RraA	0	0
Bphy_1375	1543158	1544042	+	884	CDS		AraC family transcriptional regulator	0	0
Bphy_1376	1544112	1544576	-	464	CDS		GCN5-like N-acetyltransferase	0	0
Bphy_1377	1545637	1547046	-	1409	CDS		gltX ,glutamyl-tRNA synthetase	0	0
Bphy_1378	1547302	1548378	+	1076	CDS		patatin	0	0
Bphy_1379	1548464	1549135	-	671	CDS		NLP/P60 protein	0	0
Bphy_1380	1549298	1550917	-	1619	CDS		ABC transporter-like protein	0	0
Bphy_1381	1550914	1552017	-	1103	CDS		binding-protein-dependent transport systems inner membrane component	0	0
Bphy_1382	1552019	1553059	-	1040	CDS		binding-protein-dependent transport systems inner membrane component	0	0
Bphy_1383	1553137	1555059	-	1922	CDS		extracellular solute-binding protein	0	0
Bphy_1384	1555179	1555970	+	791	CDS		enoyl-(acyl carrier protein) reductase	0	0
Bphy_1385	1556063	1556401	-	338	CDS		hypothetical protein	0	0
Bphy_1386	1557140	1558390	-	1250	CDS		aspartate kinase	0	0
Bphy_1387	1558863	1560281	-	1418	CDS		tRNA(Ile)-lysidine synthetase	0	0
Bphy_1388	1560327	1561298	-	971	CDS		acetyl-CoA carboxylase carboxyltransferase subunit alpha	0	0
Bphy_1389	1561457	1562479	-	1022	CDS		HhH-GPD family protein	0	0
Bphy_1390	1562527	1563924	-	1397	CDS	cysS	cysteinyl-tRNA synthetase	0	0
Bphy_1391	1564087	1564983	+	896	CDS		TPR repeat-containing protein	0	0
Bphy_1392	1565066	1565647	+	581	CDS		cyclophilin type peptidyl-prolyl cis-trans isomerase	0	0
Bphy_1393	1565794	1566288	+	494	CDS		cyclophilin type peptidyl-prolyl cis-trans isomerase	0	0
Bphy_1394	1566355	1567155	+	800	CDS		UDP-2,3-diacylglucosamine hydrolase	0	0
Bphy_1395	1567233	1568048	-	815	CDS		serine O-acetyltransferase	0	0
Bphy_1396	1568296	1569126	-	830	CDS		RNA methyltransferase	0	0
Bphy_1397	1569484	1570287	+	803	CDS		inositol-phosphate phosphatase	0	0
Bphy_1398	1570419	1571717	+	1298	CDS		lysophospholipid transporter LplT	0	0
Bphy_1399	1571839	1574517	+	2678	CDS		DNA mismatch repair protein MutS	0	0
Bphy_1400	1574504	1575733	+	1229	CDS		hypothetical protein	0	0
Bphy_1401	1575832	1576383	-	551	CDS		FKBP-type peptidyl-prolyl cis-trans isomerase 2-like protein	0	0
Bphy_1402	1576551	1577663	+	1112	CDS		cupin 4 family protein	0	0
Bphy_1403	1578477	1580750	-	2273	CDS		helicase c2	0	0
Bphy_1404	1580820	1581038	-	218	CDS		hypothetical protein	0	0
Bphy_1405	1581169	1582011	-	842	CDS		lipoprotein	0	0
Bphy_1406	1582366	1584708	+	2342	CDS		RNA-binding S1 domain-containing protein	0	0
Bphy_1407	1584877	1586763	-	1886	CDS		K potassium transporter	0	0
Bphy_1408	1587083	1587667	-	584	CDS		phosphoribosyltransferase	0	0
Bphy_1409	1587671	1589017	-	1346	CDS		adenylosuccinate synthetase	0	0
Bphy_1410	1589227	1590378	-	1151	CDS		hisZ ,ATP phosphoribosyltransferase regulatory subunit	0	0
Bphy_1411	1590646	1590837	-	191	CDS		hypothetical protein	0	0
Bphy_1412	1590881	1591795	-	914	CDS		hypothetical protein	0	0
Bphy_1413	1591806	1593203	-	1397	CDS		HflK protein	0	0
Bphy_1414	1593234	1594478	-	1244	CDS		GTP-binding proten HflX	0	0
Bphy_1415	1594537	1594773	-	236	CDS		hfq ,RNA-binding protein Hfq	0	0
Bphy_1416	1594964	1596304	-	1340	CDS		engA ,GTP-binding protein EngA	0	0
Bphy_1417	1596705	1597865	-	1160	CDS		outer membrane assembly lipoprotein YfgL	0	0
Bphy_1418	1597919	1598545	-	626	CDS		hypothetical protein	0	0
Bphy_1419	1598632	1599972	-	1340	CDS		hisS ,histidyl-tRNA synthetase	0	0
Bphy_1420	1600006	1601319	-	1313	CDS		ispG ,4-hydroxy-3-methylbut-2-en-1-yl diphosphate synthase	0	0
Bphy_1421	1601443	1602552	-	1109	CDS		XRE family transcriptional regulator	0	0
Bphy_1422	1602762	1603910	-	1148	CDS		radical SAM protein	0	0
Bphy_1423	1604019	1604444	-	425	CDS		ndk ,nucleoside diphosphate kinase	0	0
Bphy_1424	1604769	1605467	+	698	CDS		hypothetical protein	0	0
Bphy_1425	1605583	1606356	-	773	CDS		beta-lactamase domain-containing protein	0	0
Bphy_1426	1606365	1607513	-	1148	CDS		putative lipoprotein	0	0
Bphy_1427	1607620	1608528	-	908	CDS		dihydrodipicolinate synthase	0	0
Bphy_1428	1608571	1609188	-	617	CDS		hypothetical protein	0	0
Bphy_1429	1609188	1610390	-	1202	CDS		tryptophanyl-tRNA synthetase	0	0
Bphy_1430	1610400	1611062	-	662	CDS		peptidase M50	0	0
Bphy_1431	1611121	1611813	-	692	CDS		Sua5/YciO/YrdC/YwlC family protein	0	0
Bphy_1432	1611830	1612663	-	833	CDS		phosphotransferase domain-containing protein	0	0
Bphy_1433	1612748	1613656	-	908	CDS		alpha/beta hydrolase fold protein	0	0
Bphy_1434	1613724	1614578	-	854	CDS		hypothetical protein	0	0
Bphy_1435	1614779	1615303	+	524	CDS		hexapaptide repeat-containing transferase	0	0
Bphy_1436	1615368	1616318	+	950	CDS		Hsp33 protein	0	0
Bphy_1437	1616440	1616826	+	386	CDS		putative lipoprotein	0	0
Bphy_1438	1616938	1617387	-	449	CDS		ftsB ,cell division protein FtsB	0	0
Bphy_1439	1617530	1618813	-	1283	CDS		eno ,phosphopyruvate hydratase	0	0
Bphy_1440	1618953	1619807	-	854	CDS		2-dehydro-3-deoxyphosphooctonate aldolase	0	0
Bphy_1441	1619804	1621465	-	1661	CDS		pyrG ,CTP synthetase	0	0
Bphy_1442	1621614	1622408	-	794	CDS		alpha/beta hydrolase fold protein	0	0
Bphy_1443	1622460	1624991	-	2531	CDS		DNA internalization-related competence protein ComEC/Rec2	0	0
Bphy_1444	1625090	1625878	-	788	CDS		TatD-related deoxyribonuclease	0	0
Bphy_1445	1625914	1626657	-	743	CDS		lipoprotein releasing system, ATP-binding protein	0	0
Bphy_1446	1626650	1627903	-	1253	CDS		LolC/E family lipoprotein releasing system, transmembrane protein	0	0
Bphy_1447	1628211	1629305	+	1094	CDS		hypothetical protein	0	0
Bphy_1448	1629302	1631035	+	1733	CDS		single-stranded-DNA-specific exonuclease RecJ	0	0
Bphy_1449	1631751	1632830	+	1079	CDS		peptide chain release factor 2	0	0
Bphy_1450	1632938	1634476	+	1538	CDS		lysS ,lysyl-tRNA synthetase	0	0
Bphy_1451	1634833	1635561	+	728	CDS		17 kDa surface antigen	0	0
Bphy_1452	1635636	1635833	-	197	CDS		FeS assembly protein IscX	0	0
Bphy_1453	1635849	1636190	-	341	CDS		ferredoxin, 2Fe-2S type, ISC system	0	0
Bphy_1454	1636286	1638157	-	1871	CDS		hscA ,chaperone protein HscA	0	0
Bphy_1455	1638249	1638776	-	527	CDS		hscB ,co-chaperone HscB	0	0
Bphy_1456	1638894	1639250	-	356	CDS		iron-sulfur cluster assembly protein IscA	0	0
Bphy_1457	1639365	1639772	-	407	CDS		FeS cluster assembly scaffold IscU	0	0
Bphy_1458	1639832	1641055	-	1223	CDS		cysteine desulfurase	0	0
Bphy_1459	1641125	1641649	-	524	CDS		BadM/Rrf2 family transcriptional regulator	0	0
Bphy_1460	1641761	1642288	-	527	CDS		protein tyrosine phosphatase	0	0
Bphy_1461	1642402	1642638	-	236	CDS		hypothetical protein	0	0
Bphy_1462	1642910	1643398	+	488	CDS		hypothetical protein	0	0
Bphy_1463	1643517	1644929	-	1412	CDS		hypothetical protein	0	0
Bphy_1464	1644986	1645708	-	722	CDS		hypothetical protein	0	0
Bphy_1465	1645896	1646702	+	806	CDS		IclR family transcriptional regulator	0	0
Bphy_1466	1646785	1647948	-	1163	CDS		peptidase S11 D-alanyl-D-alanine carboxypeptidase 1	0	0
Bphy_1467	1648719	1649303	+	584	CDS		phasin family protein	0	0
Bphy_1468	1649666	1651723	-	2057	CDS		dihydrolipoamide dehydrogenase	0	0
Bphy_1469	1651989	1653635	-	1646	CDS		dihydrolipoamide acetyltransferase	0	0
Bphy_1470	1653718	1656417	-	2699	CDS	aceE	aceE ,pyruvate dehydrogenase subunit E1	0	0
Bphy_1471	1656683	1659208	+	2525	CDS		multi-sensor signal transduction histidine kinase	0	0
Bphy_1472	1659205	1659849	+	644	CDS		two component LuxR family transcriptional regulator	0	0
Bphy_1473	1660202	1661512	+	1310	CDS		hypothetical protein	0	0
Bphy_1474	1661602	1662516	+	914	CDS		hypothetical protein	0	0
Bphy_1475	1662868	1663725	+	857	CDS		methenyltetrahydrofolate cyclohydrolase	0	0
Bphy_1476	1664151	1666265	+	2114	CDS		oligopeptidase A	0	0
Bphy_1477	1666382	1667671	-	1289	CDS		cytosine deaminase	0	0
Bphy_1478	1668146	1668922	+	776	CDS		exodeoxyribonuclease III Xth	0	0
Bphy_1479	1669029	1670543	-	1514	CDS	ntrC	nitrogen metabolism transcriptional regulator NtrC	0	0
Bphy_1480	1670590	1671732	-	1142	CDS	ntrB	signal transduction histidine kinase, nitrogen specific, NtrB	0	0
Bphy_1481	1671882	1673297	-	1415	CDS		glutamine synthetase, type I	0	0
Bphy_1482	1673713	1674177	+	464	CDS		hypothetical protein	0	0
Bphy_1483	1674346	1675179	-	833	CDS		molybdopterin binding domain-containing protein	0	0
Bphy_1484	1675192	1676061	-	869	CDS		hypothetical protein	0	0
Bphy_1485	1676280	1677263	-	983	CDS		fatty acid hydroxylase	0	0
Bphy_1486	1677345	1678358	-	1013	CDS		YVTN beta-propeller repeat-containing protein	0	0
Bphy_1487	1678882	1680300	+	1418	CDS		YadA domain-containing protein	0	0
Bphy_1488	1680399	1684787	-	4388	CDS		ATP-dependent helicase HrpA	0	0
Bphy_1489	1684811	1686190	+	1379	CDS		N-acetylglutamate synthase	0	0
Bphy_1490	1686246	1686521	+	275	CDS		hypothetical protein	0	0
Bphy_1491	1687264	1688733	+	1469	CDS		general substrate transporter	0	0
Bphy_1492	1688790	1689272	-	482	CDS		phosphodiesterase	0	0
Bphy_1493	1689289	1690077	-	788	CDS		hypothetical protein	0	0
Bphy_1494	1690081	1690656	-	575	CDS		hypothetical protein	0	0
Bphy_1495	1690772	1691104	-	332	CDS		cupin 2 domain-containing protein	0	0
Bphy_1496	1691126	1692529	-	1403	CDS		mercuric reductase	0	0
Bphy_1497	1692657	1692848	-	191	CDS		hypothetical protein	0	0
Bphy_1498	1693119	1693820	-	701	CDS		glutathione S-transferase domain-containing protein	0	0
Bphy_1499	1693928	1694215	+	287	CDS		hypothetical protein	0	0
Bphy_1500	1695210	1696283	+	1073	CDS		LacI family transcription regulator	0	0
Bphy_1501	1696343	1697389	+	1046	CDS		extracellular solute-binding protein	0	0
Bphy_1502	1697386	1698210	+	824	CDS		binding-protein-dependent transport systems inner membrane component	0	0
Bphy_1503	1698216	1699154	+	938	CDS		binding-protein-dependent transport systems inner membrane component	0	0
Bphy_1504	1699151	1700203	+	1052	CDS		ABC transporter-like protein	0	0
Bphy_1505	1700340	1701167	+	827	CDS		metallophosphoesterase	0	0
Bphy_1506	1701294	1702508	+	1214	CDS		major facilitator transporter	0	0
Bphy_1507	1702580	1703011	-	431	CDS		response regulator receiver protein	0	0
Bphy_1508	1703044	1703754	-	710	CDS		two component LuxR family transcriptional regulator	0	0
Bphy_1509	1703797	1704342	-	545	CDS		Ferritin Dps family protein	0	0
Bphy_1510	1704439	1704600	-	161	CDS		hypothetical protein	0	0
Bphy_1511	1704693	1704869	-	176	CDS		hypothetical protein	0	0
Bphy_1512	1705096	1706640	+	1544	CDS		integral membrane sensor signal transduction histidine kinase	0	0
Bphy_1513	1706891	1707028	+	137	CDS		entericidin EcnAB	0	0
Bphy_1514	1707200	1707988	-	788	CDS		putative lipoprotein	0	0
Bphy_1515	1708350	1710410	+	2060	CDS		NADH:flavin oxidoreductase/NADH oxidase	0	0
Bphy_1516	1710438	1711358	-	920	CDS		hypothetical protein	0	0
Bphy_1517	1711499	1711747	+	248	CDS		hypothetical protein	0	0
Bphy_1519	1714429	1714641	+	212	CDS		hypothetical protein	0	0
Bphy_1520	1715037	1715639	+	602	CDS		hypothetical protein	0	0
Bphy_1521	1715909	1717507	+	1598	CDS		L-lactate transport	0	0
Bphy_1522	1717666	1718640	+	974	CDS		hypothetical protein	0	0
Bphy_1523	1719252	1720484	-	1232	CDS		putative exported lipoprotein	0	0
Bphy_1524	1721035	1721514	+	479	CDS		hypothetical protein	0	0
Bphy_1525	1721525	1722850	+	1325	CDS		hypothetical protein	0	0
Bphy_1526	1722943	1725150	-	2207	CDS		YadA domain-containing protein	0	0
Bphy_1527	1725536	1725766	-	230	CDS		hypothetical protein	0	0
Bphy_1528	1725896	1726372	-	476	CDS		hypothetical protein	0	0
Bphy_1529	1726471	1727238	-	767	CDS		ABC transporter-like protein	0	0
Bphy_1530	1727242	1727919	-	677	CDS		polar amino acid ABC transporter inner membrane subunit	0	0
Bphy_1531	1727941	1728723	-	782	CDS		extracellular solute-binding protein	0	0
Bphy_1532	1729204	1730655	-	1451	CDS		phenylhydantoinase	0	0
Bphy_1533	1730688	1732199	-	1511	CDS		NCS1 nucleoside transporter	0	0
Bphy_1534	1732257	1733567	-	1310	CDS		dihydropyrimidine dehydrogenase	0	0
Bphy_1535	1733617	1734966	-	1349	CDS		putative oxidoreductase	0	0
Bphy_1536	1735082	1736359	-	1277	CDS		allantoate amidohydrolase	0	0
Bphy_1537	1736756	1737460	+	704	CDS		TetR family transcriptional regulator	0	0
Bphy_1538	1737474	1738724	-	1250	CDS		benzoyl-CoA oxygenase/reductase, BoxA protein	0	0
Bphy_1539	1738770	1740197	-	1427	CDS		benzoyl-CoA oxygenase subunit BoxB	0	0
Bphy_1540	1740250	1741932	-	1682	CDS		benzoyl-CoA-dihydrodiol lyase	0	0
Bphy_1541	1742067	1743020	-	953	CDS		anaerobic benzoate catabolism transcriptional regulator	0	0
Bphy_1542	1743274	1743753	+	479	CDS		hypothetical protein	0	0
Bphy_1543	1743823	1745421	+	1598	CDS		benzoate-CoA ligase family	0	0
Bphy_1544	1745430	1746284	+	854	CDS		alpha/beta hydrolase fold protein	0	0
Bphy_1545	1746547	1746891	+	344	CDS		hypothetical protein	0	0
Bphy_1546	1746966	1749080	+	2114	CDS		phospholipase C	0	0
Bphy_1547	1749171	1749875	-	704	CDS		glutathione S-transferase domain-containing protein	0	0
Bphy_1548	1749979	1751049	-	1070	CDS		hypothetical protein	0	0
Bphy_1549	1751075	1757068	-	5993	CDS		excinuclease ABC subunit A	0	0
Bphy_1550	1757763	1758047	+	284	CDS		hypothetical protein	0	0
Bphy_1551	1758355	1758753	-	398	CDS		MerR family transcriptional regulator	0	0
Bphy_1552	1758808	1759161	-	353	CDS		integration host factor subunit alpha	0	0
Bphy_1553	1759273	1761705	-	2432	CDS		pheT ,phenylalanyl-tRNA synthetase subunit beta	0	0
Bphy_1554	1761837	1762859	-	1022	CDS		pheS ,phenylalanyl-tRNA synthetase subunit alpha	0	0
Bphy_1555	1763009	1763368	-	359	CDS		rplT ,50S ribosomal protein L20	0	0
Bphy_1556	1763398	1763595	-	197	CDS		rpmI ,50S ribosomal protein L35	0	0
Bphy_1557	1763852	1764322	-	470	CDS		translation initiation factor IF-3	0	0
Bphy_1558	1764427	1766334	-	1907	CDS		thrS ,threonyl-tRNA synthetase	0	0
Bphy_1559	1766792	1769032	-	2240	CDS	relA	(p)ppGpp synthetase I SpoT/RelA	0	0
Bphy_1560	1769091	1769444	-	353	CDS		endoribonuclease L-PSP	0	0
Bphy_1561	1769548	1770468	-	920	CDS		alpha/beta hydrolase fold protein	0	0
Bphy_1562	1770678	1771319	-	641	CDS		3-oxoacid CoA-transferase subunit B	0	0
Bphy_1563	1771322	1772026	-	704	CDS		3-oxoacid CoA-transferase subunit A	0	0
Bphy_1564	1772303	1772848	+	545	CDS		LuxR family transcriptional regulator	0	0
Bphy_1565	1772908	1773336	-	428	CDS		thioesterase superfamily protein	0	0
Bphy_1566	1773552	1774328	-	776	CDS		short chain dehydrogenase	0	0
Bphy_1567	1774515	1776188	+	1673	CDS		electron-transferring-flavoprotein dehydrogenase	0	0
Bphy_1568	1776252	1777715	-	1463	CDS		TPR repeat-containing protein	0	0
Bphy_1569	1777762	1778862	-	1100	CDS		chorismate synthase	0	0
Bphy_1570	1779015	1780952	-	1937	CDS		phospholipid/glycerol acyltransferase	0	0
Bphy_1571	1781110	1781607	-	497	CDS		CBS domain-containing protein	0	0
Bphy_1572	1781979	1783313	+	1334	CDS		O-acetylhomoserine aminocarboxypropyltransferase	0	0
Bphy_1573	1783310	1784155	+	845	CDS		alpha/beta hydrolase fold protein	0	0
Bphy_1574	1784295	1784618	+	323	CDS		hypothetical protein	0	0
Bphy_1575	1784661	1785980	-	1319	CDS		ribonuclease BN	0	0
Bphy_1576	1786163	1786771	+	608	CDS		flavoprotein WrbA	0	0
Bphy_1577	1786774	1787199	+	425	CDS		hypothetical protein	0	0
Bphy_1578	1787311	1788738	+	1427	CDS		FAD linked oxidase domain-containing protein	0	0
Bphy_1579	1788778	1789620	+	842	CDS		metallophosphoesterase	0	0
Bphy_1580	1789640	1789801	-	161	CDS		hypothetical protein	0	0
Bphy_1581	1789969	1790907	-	938	CDS		LysR family transcriptional regulator	0	0
Bphy_1582	1791074	1792621	+	1547	CDS		RND efflux system outer membrane lipoprotein	0	0
Bphy_1583	1792636	1794870	+	2234	CDS		fusaric acid resistance protein	0	0
Bphy_1584	1794860	1795060	+	200	CDS		hypothetical protein	0	0
Bphy_1585	1795078	1795938	+	860	CDS		secretion protein HlyD family protein	0	0
Bphy_1586	1796090	1797751	-	1661	CDS		methyl-accepting chemotaxis sensory transducer	0	0
Bphy_1587	1798208	1799446	+	1238	CDS		major facilitator transporter	0	0
Bphy_1588	1799620	1801620	+	2000	CDS		prpE ,propionyl-CoA synthetase	0	0
Bphy_1589	1801660	1802448	-	788	CDS		5'-methylthioadenosine/S-adenosylhomocysteine nucleosidase	0	0
Bphy_1590	1802445	1804817	-	2372	CDS		UvrD/REP helicase	0	0
Bphy_1591	1805086	1807959	+	2873	CDS		valS ,valyl-tRNA synthetase	0	0
Bphy_1592	1808032	1808913	+	881	CDS		UTP-glucose-1-phosphate uridylyltransferase	0	0
Bphy_1593	1809137	1809373	-	236	CDS		SirA family protein	0	0
Bphy_1594	1809484	1810506	-	1022	CDS		oxidoreductase domain-containing protein	0	0
Bphy_1595	1810506	1811525	-	1019	CDS		inositol 2-dehydrogenase	0	0
Bphy_1596	1811518	1812399	-	881	CDS		RpiR family transcriptional regulator	0	0
Bphy_1597	1812682	1813737	+	1055	CDS		ABC sugar transporter periplasmic ligand binding protein	0	0
Bphy_1598	1814207	1815364	+	1157	CDS		monosaccharide-transporting ATPase	0	0
Bphy_1599	1815382	1816185	+	803	CDS		ABC transporter-like protein	0	0
Bphy_1600	1816232	1818244	+	2012	CDS		ribokinase-like domain-containing protein	0	0
Bphy_1601	1818241	1820190	+	1949	CDS		thiamine pyrophosphate protein central region	0	0
Bphy_1602	1820201	1821121	+	920	CDS		xylose isomerase domain-containing protein	0	0
Bphy_1603	1821118	1821924	+	806	CDS		myo-inositol catabolism IolB domain-containing protein	0	0
Bphy_1604	1822847	1823560	-	713	CDS		ABC transporter-like protein	0	0
Bphy_1605	1823557	1824327	-	770	CDS		ABC transporter-like protein	0	0
Bphy_1606	1824324	1825583	-	1259	CDS		inner-membrane translocator	0	0
Bphy_1607	1825576	1826526	-	950	CDS		inner-membrane translocator	0	0
Bphy_1608	1826530	1826982	-	452	CDS		thioesterase superfamily protein	0	0
Bphy_1609	1827012	1828160	-	1148	CDS		alcohol dehydrogenase	0	0
Bphy_1610	1828233	1829264	-	1031	CDS		threonine aldolase	0	0
Bphy_1611	1829466	1830695	-	1229	CDS		hypothetical protein	0	0
Bphy_1612	1830799	1831704	+	905	CDS		LysR family transcriptional regulator	0	0
Bphy_1613	1831837	1834461	-	2624	CDS		alaS ,alanyl-tRNA synthetase	0	0
Bphy_1614	1834768	1835988	+	1220	CDS		L-carnitine dehydratase/bile acid-inducible protein F	0	0
Bphy_1615	1836125	1836676	-	551	CDS		hypothetical protein	0	0
Bphy_1616	1836724	1838502	-	1778	CDS		gamma-glutamyltransferase	0	0
Bphy_1617	1838855	1839544	+	689	CDS		Ser/Thr protein phosphatase family protein	0	0
Bphy_1618	1839561	1839938	+	377	CDS		cytochrome c oxidase subunit II	0	0
Bphy_1619	1839948	1840859	-	911	CDS		LysR family transcriptional regulator	0	0
Bphy_1620	1841045	1842820	+	1775	CDS		glyoxylate carboligase	0	0
Bphy_1621	1842930	1843730	+	800	CDS		hydroxypyruvate isomerase	0	0
Bphy_1623	1844956	1846218	-	1262	CDS		L-sorbosone dehydrogenase	0	0
Bphy_1624	1846548	1847615	-	1067	CDS		type II L-asparaginase	0	0
Bphy_1625	1847665	1848591	-	926	CDS		transcriptional regulator CysB-like protein	0	0
Bphy_1626	1848700	1849758	-	1058	CDS		sulfate ABC transporter ATPase	0	0
Bphy_1628	1850775	1851671	-	896	CDS		sulfate ABC transporter inner membrane subunit CysT	0	0
Bphy_1629	1851767	1852810	-	1043	CDS		sulfate ABC transporter periplasmic sulfate-binding protein	0	0
Bphy_1630	1853111	1853761	+	650	CDS		LexA repressor	0	0
Bphy_1631	1853789	1854133	+	344	CDS		hypothetical protein	0	0
Bphy_1632	1854218	1854871	+	653	CDS		putative transmembrane protein	0	0
Bphy_1633	1854899	1855363	-	464	CDS		UspA domain-containing protein	0	0
Bphy_1634	1855625	1856539	+	914	CDS	nodI1	nodulation ABC transporter NodI	0	0
Bphy_1635	1856583	1857410	+	827	CDS		ABC transporter	0	0
Bphy_1636	1857468	1857890	-	422	CDS		hypothetical protein	0	0
Bphy_1637	1858137	1859201	-	1064	CDS		permease	0	0
Bphy_1638	1859480	1860532	-	1052	CDS		aldo/keto reductase	0	0
Bphy_1639	1860695	1862137	+	1442	CDS		EmrB/QacA family drug resistance transporter	0	0
Bphy_1640	1862178	1862390	+	212	CDS		putative cytoplasmic protein	0	0
Bphy_1641	1862685	1863686	-	1001	CDS		YjbN family TIM-barrel protein	0	0
Bphy_1642	1864039	1864305	+	266	CDS		hypothetical protein	0	0
Bphy_1643	1864707	1864958	-	251	CDS		hypothetical protein	0	0
Bphy_1644	1865043	1865243	-	200	CDS		hypothetical protein	0	0
Bphy_1645	1865469	1865744	+	275	CDS		hypothetical protein	0	0
Bphy_1646	1865811	1866026	-	215	CDS		TOBE domain-containing protein	0	0
Bphy_1647	1866085	1867077	-	992	CDS		ABC transporter-like protein	0	0
Bphy_1648	1867074	1867925	-	851	CDS		binding-protein-dependent transport systems inner membrane component	0	0
Bphy_1649	1867976	1869133	-	1157	CDS		alkanesulfonate monooxygenase	0	0
Bphy_1650	1869179	1869433	+	254	CDS		hypothetical protein	0	0
Bphy_1651	1869754	1870173	+	419	CDS		putative transmembrane protein	0	0
Bphy_1652	1870245	1871375	-	1130	CDS		3-hydroxyisobutyryl-CoA hydrolase	0	0
Bphy_1653	1871496	1872242	-	746	CDS		TetR family transcriptional regulator	0	0
Bphy_1654	1872370	1873350	+	980	CDS		NAD-dependent epimerase/dehydratase	0	0
Bphy_1655	1873394	1873681	-	287	CDS		hypothetical protein	0	0
Bphy_1656	1873909	1874184	-	275	CDS		hypothetical protein	0	0
Bphy_1657	1874346	1874579	+	233	CDS		hypothetical protein	0	0
Bphy_1658	1874716	1875069	+	353	CDS		hypothetical protein	0	0
Bphy_1659	1875097	1875435	-	338	CDS		small multidrug resistance protein	0	0
Bphy_1660	1875439	1875936	-	497	CDS		hypothetical protein	0	0
Bphy_1661	1876447	1876992	+	545	CDS		NUDIX hydrolase	0	0
Bphy_1662	1877009	1877746	+	737	CDS		aat ,leucyl/phenylalanyl-tRNA--protein transferase	0	0
Bphy_1663	1877917	1878756	+	839	CDS		arginyl-tRNA-protein transferase	0	0
Bphy_1664	1878867	1879901	+	1034	CDS		dihydroorotate dehydrogenase 2	0	0
Bphy_1665	1879954	1880658	-	704	CDS		signal peptidase I	0	0
Bphy_1666	1880796	1881800	-	1004	CDS		oxidoreductase domain-containing protein	0	0
Bphy_1667	1881923	1882669	-	746	CDS		GntR domain-containing protein	0	0
Bphy_1668	1883210	1883800	+	590	CDS		hypothetical protein	0	0
Bphy_1669	1884197	1884931	+	734	CDS		Crp/FNR family transcriptional regulator	0	0
Bphy_1670	1884937	1885236	+	299	CDS		hypothetical protein	0	0
Bphy_1671	1885242	1885952	+	710	CDS		4'-phosphopantetheinyl transferase	0	0
Bphy_1672	1886459	1896466	+	10007	CDS		amino acid adenylation domain-containing protein	0	0
Bphy_1673	1896470	1898800	+	2330	CDS		condensation domain-containing protein	0	0
Bphy_1674	1898820	1899974	+	1154	CDS		hypothetical protein	0	0
Bphy_1675	1900125	1901417	+	1292	CDS		polysaccharide biosynthesis protein	0	0
Bphy_1676	1902093	1903196	-	1103	CDS		acyltransferase 3	0	0
Bphy_1677	1903257	1904354	-	1097	CDS		group 1 glycosyl transferase	0	0
Bphy_1678	1904544	1905485	-	941	CDS		glycosyl transferase family protein	0	0
Bphy_1679	1905729	1907129	-	1400	CDS		hypothetical protein	0	0
Bphy_1680	1907189	1908406	-	1217	CDS		group 1 glycosyl transferase	0	0
Bphy_1681	1908394	1909494	-	1100	CDS		group 1 glycosyl transferase	0	0
Bphy_1682	1909783	1910769	-	986	CDS		transcription factor jumonji domain-containing protein	0	0
Bphy_1683	1910951	1912024	-	1073	CDS		acyltransferase 3	0	0
Bphy_1684	1912363	1914234	-	1871	CDS		FkbH like protein	0	0
Bphy_1685	1914833	1915915	+	1082	CDS		glycosyl transferase family protein	0	0
Bphy_1686	1916390	1918156	+	1766	CDS		hypothetical protein	0	0
Bphy_1687	1918217	1919608	-	1391	CDS		putative calcium binding protein	0	0
Bphy_1688	1920030	1921133	+	1103	CDS		acyltransferase 3	0	0
Bphy_1689	1921680	1923914	-	2234	CDS		exopolysaccharide transport protein family	0	0
Bphy_1690	1923974	1925260	-	1286	CDS		polysaccharide export protein	0	0
Bphy_1691	1925465	1926595	-	1130	CDS		exopolysaccharide biosynthesis polyprenyl glycosylphosphotransferase	0	0
Bphy_1692	1926576	1927103	-	527	CDS		hypothetical protein	0	0
Bphy_1693	1927395	1928090	-	695	CDS		ribose-5-phosphate isomerase A	0	0
Bphy_1694	1928206	1929078	-	872	CDS		N-acetylmuramyl-L-alanine amidase, negative regulator of AmpC, AmpD	0	0
Bphy_1695	1929652	1930713	+	1061	CDS		acyltransferase 3	0	0
Bphy_1696	1930852	1931595	-	743	CDS		RNA methyltransferase	0	0
Bphy_1697	1931729	1934182	-	2453	CDS		ribonuclease R	0	0
Bphy_1698	1935431	1936654	+	1223	CDS		major facilitator transporter	0	0
Bphy_1699	1936907	1937779	+	872	CDS		TetR family transcriptional regulator	0	0
Bphy_1700	1937875	1940544	+	2669	CDS		fadE ,acyl-CoA dehydrogenase	0	0
Bphy_1701	1940675	1942090	+	1415	CDS		fabG ,3-ketoacyl-(acyl-carrier-protein) reductase	0	0
Bphy_1702	1942095	1943012	+	917	CDS		dehydratase	0	0
Bphy_1703	1943152	1944480	+	1328	CDS		acetyl-CoA acetyltransferase	0	0
Bphy_1704	1944579	1946378	+	1799	CDS		AMP-dependent synthetase and ligase	0	0
Bphy_1705	1946412	1946804	-	392	CDS		hypothetical protein	0	0
Bphy_1706	1946824	1948404	-	1580	CDS		FAD linked oxidase domain-containing protein	0	0
Bphy_1707	1948496	1948942	-	446	CDS		putative lipoprotein	0	0
Bphy_1708	1949193	1949987	-	794	CDS		putative transmembrane anti-sigma factor	0	0
Bphy_1709	1949998	1950516	-	518	CDS		ECF subfamily RNA polymerase sigma-24 factor	0	0
Bphy_1710	1950550	1950810	-	260	CDS		hypothetical protein	0	0
Bphy_1711	1951214	1951666	+	452	CDS		RNA chaperone Hfq	0	0
Bphy_1712	1951727	1951966	-	239	CDS		hypothetical protein	0	0
Bphy_1713	1952127	1952393	+	266	CDS		hypothetical protein	0	0
Bphy_1714	1952390	1952641	+	251	CDS		hypothetical protein	0	0
Bphy_1715	1952690	1953361	-	671	CDS		putative signal peptide protein	0	0
Bphy_1716	1953889	1954374	+	485	CDS		putative signal peptide protein	0	0
Bphy_1717	1954514	1954966	-	452	CDS		putative transposase protein	0	0
Bphy_1718	1955124	1956221	-	1097	CDS		AFG1 family ATPase	0	0
Bphy_1719	1956318	1957748	-	1430	CDS		dihydrolipoamide dehydrogenase	0	0
Bphy_1720	1957887	1959158	-	1271	CDS		dihydrolipoamide succinyltransferase	0	0
Bphy_1721	1959301	1962156	-	2855	CDS		sucA ,2-oxoglutarate dehydrogenase E1 component	0	0
Bphy_1722	1962532	1964358	-	1826	CDS		GTP-binding protein TypA	0	0
Bphy_1723	1964674	1965189	+	515	CDS		MarR family transcriptional regulator	0	0
Bphy_1724	1965222	1966769	+	1547	CDS		RND efflux system outer membrane lipoprotein	0	0
Bphy_1725	1966850	1968070	+	1220	CDS		efflux pump membrane protein	0	0
Bphy_1726	1968109	1969674	+	1565	CDS		EmrB/QacA family drug resistance transporter	0	0
Bphy_1727	1970128	1971057	-	929	CDS		truB ,tRNA pseudouridine synthase B	0	0
Bphy_1728	1971081	1971512	-	431	CDS		rbfA ,ribosome-binding factor A	0	0
Bphy_1729	1971625	1974522	-	2897	CDS		infB ,translation initiation factor IF-2	0	0
Bphy_1730	1974619	1976094	-	1475	CDS		nusA ,transcription elongation factor NusA	0	0
Bphy_1731	1976091	1976549	-	458	CDS		hypothetical protein	0	0
Bphy_1732	1976972	1978765	-	1793	CDS		pseudouridine synthase	0	0
Bphy_1733	1978826	1979908	-	1082	CDS		segregation and condensation protein B	0	0
Bphy_1734	1980219	1981451	-	1232	CDS		aspartate aminotransferase	0	0
Bphy_1735	1981559	1982461	-	902	CDS		LysR family transcriptional regulator	0	0
Bphy_1736	1982880	1983278	+	398	CDS		putative transposase A protein	0	0
Bphy_1737	1983621	1983938	+	317	CDS		hypothetical protein	0	0
Bphy_1738	1984248	1984562	-	314	CDS		hypothetical protein	0	0
Bphy_1739	1984855	1985541	+	686	CDS		hypothetical protein	0	0
Bphy_1740	1985567	1985836	-	269	CDS		hypothetical protein	0	0
Bphy_1741	1985895	1986131	+	236	CDS		putative signal peptide protein	0	0
Bphy_1742	1986352	1986609	+	257	CDS		hypothetical protein	0	0
Bphy_1743	1986704	1987027	-	323	CDS		antibiotic biosynthesis monooxygenase	0	0
Bphy_1744	1987323	1988597	+	1274	CDS		diguanylate phosphodiesterase	0	0
Bphy_1745	1988618	1989025	-	407	CDS		peptidyl-tRNA hydrolase domain-containing protein	0	0
Bphy_1746	1989197	1989856	+	659	CDS		putative transmembrane protein	0	0
Bphy_1747	1989853	1991871	-	2018	CDS		exodeoxyribonuclease V subunit alpha	0	0
Bphy_1748	1991868	1995593	-	3725	CDS		exodeoxyribonuclease V subunit beta	0	0
Bphy_1749	1995590	1998955	-	3365	CDS		exodeoxyribonuclease V subunit gamma	0	0
Bphy_1751	2001596	2001841	-	245	CDS		hypothetical protein	0	0
Bphy_1752	2001918	2002400	-	482	CDS		AsnC family transcriptional regulator	0	0
Bphy_1753	2002533	2003165	+	632	CDS		cysteine dioxygenase type I	0	0
Bphy_1754	2003252	2005891	-	2639	CDS		mechanosensitive ion channel MscS	0	0
Bphy_1755	2006078	2006725	-	647	CDS		NAD-dependent epimerase/dehydratase	0	0
Bphy_1756	2006822	2007316	-	494	CDS		BadM/Rrf2 family transcriptional regulator	0	0
Bphy_1757	2007381	2007851	-	470	CDS		hypothetical protein	0	0
Bphy_1758	2008028	2008609	+	581	CDS		PfpI family intracellular peptidase	0	0
Bphy_1759	2008727	2009050	+	323	CDS		hypothetical protein	0	0
Bphy_1760	2009091	2010782	-	1691	CDS		histidine kinase	0	0
Bphy_1762	2012693	2013073	+	380	CDS	crcB	camphor resistance protein CrcB	0	0
Bphy_1763	2013227	2013580	+	353	CDS		hypothetical protein	0	0
Bphy_1764	2013688	2013861	+	173	CDS		hypothetical protein	0	0
Bphy_1765	2013924	2014589	-	665	CDS		hypothetical protein	0	0
Bphy_1766	2014705	2015580	-	875	CDS		CHAD domain-containing protein	0	0
Bphy_1767	2015693	2016028	-	335	CDS		hypothetical protein	0	0
Bphy_1768	2016399	2016845	+	446	CDS		PRC-barrel domain-containing protein	0	0
Bphy_1770	2018400	2018621	-	221	CDS		hypothetical protein	0	0
Bphy_1771	2018795	2020204	+	1409	CDS		RND family efflux transporter MFP subunit	0	0
Bphy_1772	2020220	2023357	+	3137	CDS		acriflavin resistance protein	0	0
Bphy_1773	2023374	2026685	+	3311	CDS		acriflavin resistance protein	0	0
Bphy_1774	2026725	2027189	-	464	CDS		putative signal peptide transmembrane protein	0	0
Bphy_1775	2027313	2027876	-	563	CDS		alkyl hydroperoxide reductase/ Thiol specific antioxidant/ Mal allergen	0	0
Bphy_1776	2028038	2029384	-	1346	CDS		diguanylate phosphodiesterase	0	0
Bphy_1777	2029702	2031531	+	1829	CDS		diguanylate cyclase/phosphodiesterase	0	0
Bphy_1778	2031599	2033056	+	1457	CDS		putative signal transduction protein	0	0
Bphy_1779	2033137	2034489	-	1352	CDS		diguanylate phosphodiesterase	0	0
Bphy_1780	2034780	2035577	-	797	CDS		cationic amino acid ABC transporter periplasmic binding protein	0	0
Bphy_1781	2035661	2035948	-	287	CDS		hypothetical protein	0	0
Bphy_1782	2036627	2037670	-	1043	CDS		succinylglutamate desuccinylase	0	0
Bphy_1783	2037654	2038994	-	1340	CDS		succinylarginine dihydrolase	0	0
Bphy_1784	2039004	2040467	-	1463	CDS		astD ,succinylglutamic semialdehyde dehydrogenase	0	0
Bphy_1785	2040478	2041503	-	1025	CDS		arginine N-succinyltransferase	0	0
Bphy_1786	2041500	2042552	-	1052	CDS		arginine/ornithine succinyltransferase subunit alpha	0	0
Bphy_1787	2042581	2043810	-	1229	CDS	argD2	bifunctional N-succinyldiaminopimelate-aminotransferase/acetylornithine transaminase protein	0	0
Bphy_1788	2043935	2044987	-	1052	CDS		AraC family transcriptional regulator	0	0
Bphy_1790	2045906	2046619	-	713	CDS		polar amino acid ABC transporter inner membrane subunit	0	0
Bphy_1791	2046648	2047337	-	689	CDS		polar amino acid ABC transporter inner membrane subunit	0	0
Bphy_1792	2047762	2048370	+	608	CDS		type 11 methyltransferase	0	0
Bphy_1793	2048401	2049432	-	1031	CDS		patatin	0	0
Bphy_1794	2049550	2050131	-	581	CDS		putative lipoprotein	0	0
Bphy_1795	2051059	2052069	+	1010	CDS		luciferase family protein	0	0
Bphy_1796	2052122	2053285	-	1163	CDS		alpha/beta hydrolase fold protein	0	0
Bphy_1797	2053710	2054978	+	1268	CDS	glgC	glgC ,glucose-1-phosphate adenylyltransferase	0	0
Bphy_1798	2055160	2056620	+	1460	CDS	glgA1	glgA ,glycogen synthase	0	0
Bphy_1799	2056898	2057761	+	863	CDS		pyridoxal kinase	0	0
Bphy_1800	2058160	2058621	+	461	CDS		hypothetical protein	0	0
Bphy_1801	2058771	2060669	-	1898	CDS		putative transmembrane protein	0	0
Bphy_1802	2060666	2061511	-	845	CDS		AraC family transcriptional regulator	0	0
Bphy_1803	2061695	2062243	+	548	CDS		hypothetical protein	0	0
Bphy_1804	2062272	2063660	-	1388	CDS		major facilitator transporter	0	0
Bphy_1805	2063804	2065027	-	1223	CDS		GntR family transcriptional regulator	0	0
Bphy_1806	2065150	2066004	+	854	CDS		LysR family transcriptional regulator	0	0
Bphy_1807	2066029	2066703	-	674	CDS		hypothetical protein	0	0
Bphy_1808	2067070	2067882	-	812	CDS		N-formylglutamate amidohydrolase	0	0
Bphy_1809	2067937	2069367	-	1430	CDS		N-formimino-L-glutamate deiminase	0	0
Bphy_1810	2069364	2070584	-	1220	CDS		imidazolonepropionase	0	0
Bphy_1811	2070641	2071258	-	617	CDS		hypothetical protein	0	0
Bphy_1812	2071261	2072949	-	1688	CDS		urocanate hydratase	0	0
Bphy_1813	2073014	2073718	-	704	CDS		histidine utilization repressor	0	0
Bphy_1814	2073749	2075272	-	1523	CDS		histidine ammonia-lyase	0	0
Bphy_1815	2075269	2075613	-	344	CDS		hypothetical protein	0	0
Bphy_1816	2075672	2076577	+	905	CDS		NAD-dependent epimerase/dehydratase	0	0
Bphy_1817	2076724	2076906	+	182	CDS		hypothetical protein	0	0
Bphy_1818	2076940	2077716	-	776	CDS		hypothetical protein	0	0
Bphy_1819	2077768	2078196	-	428	CDS		activator of Hsp90 ATPase 1 family protein	0	0
Bphy_1820	2078202	2078525	-	323	CDS		eplicon_xref "NC_010622"	0	0
Bphy_1821	2078639	2080036	-	1397	CDS		xanthine/uracil/vitamin C permease	0	0
Bphy_1822	2080528	2081559	+	1031	CDS		hypothetical protein	0	0
Bphy_1823	2081556	2082815	+	1259	CDS		major facilitator transporter	0	0
Bphy_1824	2083602	2084948	-	1346	CDS		major facilitator transporter	0	0
Bphy_1825	2084967	2086130	-	1163	CDS		amidohydrolase	0	0
Bphy_1826	2086266	2087216	+	950	CDS		LysR family transcriptional regulator	0	0
Bphy_1827	2087348	2088301	-	953	CDS		LysR family transcriptional regulator	0	0
Bphy_1828	2088429	2089781	+	1352	CDS		NADH dehydrogenase	0	0
Bphy_1829	2089819	2090712	-	893	CDS		chromosome replication initiation inhibitor protein	0	0
Bphy_1830	2090810	2091424	+	614	CDS		lysine exporter protein LysE/YggA	0	0
Bphy_1831	2091437	2092402	-	965	CDS		hypothetical protein	0	0
Bphy_1832	2092420	2093793	-	1373	CDS		putative transmembrane protein	0	0
Bphy_1833	2093793	2095409	-	1616	CDS		group 1 glycosyl transferase	0	0
Bphy_1834	2095406	2096455	-	1049	CDS		putative transmembrane protein	0	0
Bphy_1835	2096448	2097863	-	1415	CDS		putative transmembrane protein	0	0
Bphy_1836	2097958	2098509	-	551	CDS		hypothetical protein	0	0
Bphy_1837	2098557	2102525	-	3968	CDS		me "signal peptide protein (pseudogene) ,signal peptide protein (pseudogene)"	0	0
Bphy_1837	2098557	2102525	-	3968	CDS		me "signal peptide protein (pseudogene)"	0	0
Bphy_1839	2102515	2105361	-	2846	CDS		hypothetical protein	0	0
Bphy_1840	2105875	2106690	+	815	CDS		AraC family transcriptional regulator	0	0
Bphy_1841	2106778	2107428	+	650	CDS		lysine exporter protein LysE/YggA	0	0
Bphy_1842	2107706	2107867	+	161	CDS		hypothetical protein	0	0
Bphy_1843	2107947	2108210	-	263	CDS		hypothetical protein	0	0
Bphy_1844	2108321	2109049	-	728	CDS		TetR family transcriptional regulator	0	0
Bphy_1845	2109202	2110113	-	911	CDS		LysR family transcriptional regulator	0	0
Bphy_1846	2110210	2111106	+	896	CDS		hypothetical protein	0	0
Bphy_1847	2111195	2111620	+	425	CDS		hypothetical protein	0	0
Bphy_1848	2111627	2114362	-	2735	CDS		2-oxoacid dehydrogenase subunit E1	0	0
Bphy_1849	2114425	2115066	+	641	CDS		AsnC family transcriptional regulator	0	0
Bphy_1850	2115098	2116771	-	1673	CDS		AMP-dependent synthetase and ligase	0	0
Bphy_1851	2116955	2117227	+	272	CDS		hypothetical protein	0	0
Bphy_1852	2117245	2117616	-	371	CDS		hypothetical protein	0	0
Bphy_1853	2117767	2118543	+	776	CDS		GDSL family lipase	0	0
Bphy_1854	2118567	2118872	-	305	CDS		hypothetical protein	0	0
Bphy_1855	2120192	2120809	+	617	CDS		ATP dependent DNA ligase	0	0
Bphy_1856	2120849	2121064	+	215	CDS		YcfA family protein	0	0
Bphy_1857	2121120	2121536	+	416	CDS		hypothetical protein	0	0
Bphy_1858	2121909	2122289	-	380	CDS		hypothetical protein	0	0
Bphy_1859	2122289	2122708	-	419	CDS		hypothetical protein	0	0
Bphy_1860	2122750	2122962	-	212	CDS		hypothetical protein	0	0
Bphy_1861	2123014	2123853	-	839	CDS		hypothetical protein	0	0
Bphy_1862	2123922	2124419	-	497	CDS		hypothetical protein	0	0
Bphy_1863	2124416	2124988	-	572	CDS		glycoside hydrolase family protein	0	0
Bphy_1864	2124990	2125238	-	248	CDS		hypothetical protein	0	0
Bphy_1865	2125474	2125758	+	284	CDS		hypothetical protein	0	0
Bphy_1866	2125761	2126453	+	692	CDS		hypothetical protein	0	0
Bphy_1867	2126506	2127699	+	1193	CDS		acyltransferase-like protein	0	0
Bphy_1868	2127881	2128753	-	872	CDS		hypothetical protein	0	0
Bphy_1869	2128763	2129356	-	593	CDS		hypothetical protein	0	0
Bphy_1870	2129365	2130468	-	1103	CDS		baseplate J family protein	0	0
Bphy_1871	2130468	2131685	-	1217	CDS		GP46 family protein	0	0
Bphy_1872	2131682	2132281	-	599	CDS		phage baseplate assembly protein V	0	0
Bphy_1873	2132278	2133369	-	1091	CDS		Mu P family protein	0	0
Bphy_1874	2133373	2134845	-	1472	CDS		DNA circulation family protein	0	0
Bphy_1875	2134842	2136644	-	1802	CDS		hypothetical protein	0	0
Bphy_1876	2136763	2137050	-	287	CDS		hypothetical protein	0	0
Bphy_1877	2137054	2137425	-	371	CDS		hypothetical protein	0	0
Bphy_1878	2137487	2138968	-	1481	CDS		Mu tail sheath family protein	0	0
Bphy_1879	2138971	2139147	-	176	CDS		hypothetical protein	0	0
Bphy_1880	2139157	2139720	-	563	CDS		hypothetical protein	0	0
Bphy_1881	2139717	2140049	-	332	CDS		hypothetical protein	0	0
Bphy_1882	2140049	2141086	-	1037	CDS		putative phage protein GP20	0	0
Bphy_1883	2141150	2141797	-	647	CDS		putative phage protein GP19	0	0
Bphy_1884	2141832	2142491	-	659	CDS		hypothetical protein	0	0
Bphy_1886	2143394	2144173	-	779	CDS		hypothetical protein	0	0
Bphy_1887	2144218	2145888	-	1670	CDS		lambda family phage portal protein	0	0
Bphy_1888	2145888	2146133	-	245	CDS		hypothetical protein	0	0
Bphy_1889	2146141	2148168	-	2027	CDS		terminase GpA	0	0
Bphy_1890	2148221	2148814	-	593	CDS		hypothetical protein	0	0
Bphy_1891	2148983	2149561	-	578	CDS		hypothetical protein	0	0
[truncated: 5,953 more rows]
