# Supplementary material for: Tn-seq profiling reveals that NodS of the beta-rhizobium Paraburkholderia phymatum is detrimental for nodulating soybean
Source: Research Square preprint supplement (doi:10.21203/rs.3.rs-4046625/v1), 2024-03-28
Supplement: Supplementary file 2 [file e1f9a0c1f664fa692a1be432.xlsx]

## Sheet: Essential genes UID 0.012
Supplementary Table 2: List of the P. phymatum STM815T essential genes in ABS minimal media grown at 28 °C. UIC, unique insertion counts; UID, unique insertion density; nUID, normalized UID; COG, Cluster of Orthologous Group; KEGG, Kyoto Encyclopedia of Genes and Genomes; PFAMs, Protein Family Motives
Locus tag	Start coordinates	End coordinates	Strand	Length	Locus type	Gene name	Description	UID_ABS	UIC_ABS	nUID_ABS	Chromosome/Plasmid name	Subcellular localization	COG	KEGG Pathway	PFAMs
Bphy_0001	362	1918	+	1556	CDS	dnaA	chromosomal replication initiation protein	0.00128452	2	0.000101676	chromosome 1	Cytoplasmic	L	map02020,map04112	Bac_DnaA,Bac_DnaA_C,DnaA_N
Bphy_0002	2175	3278	+	1103	CDS		DNA polymerase III subunit beta	0.00181159	2	0.000143397	chromosome 1	Cytoplasmic	L	map00230,map00240,map01100,map03030,map03430,map03440	DNA_pol3_beta,DNA_pol3_beta_2,DNA_pol3_beta_3
Bphy_0003	3392	5863	+	2471	CDS		gyrB ,DNA gyrase subunit B	0.000809061	2	6.40414e-05	chromosome 1	Cytoplasmic	L	-	DNA_gyraseB,DNA_gyraseB_C,HATPase_c,Toprim
Bphy_0019	21120	21953	+	833	CDS		putative transmembrane anti-sigma factor	0.00839329	7	0.000664372	chromosome 1	Unknown	K	-	zf-HC2
Bphy_0032	37341	40067	-	2726	CDS		DNA topoisomerase III	0	0	0	chromosome 1		L	-	SWIB,Topoisom_bac,Toprim,Toprim_Crpt
Bphy_0036	42691	43674	+	983	CDS		fmt ,methionyl-tRNA formyltransferase	0.00609756	6	0.000482653	chromosome 1	Unknown (This protein may have multiple localization sites)	J	map00670,map00970	Formyl_trans_C,Formyl_trans_N
Bphy_0044	52054	52686	+	632	CDS		radical SAM domain-containing protein	0.00473934	3	0.000375143	chromosome 1	Cytoplasmic	H	map00790,map01100	Fer4_14,Radical_SAM
Bphy_0048	54875	56023	-	1148	CDS		rod shape-determining protein RodA	0	0	0	chromosome 1	Cytoplasmic Membrane	M	-	FTSW_RODA_SPOVE
Bphy_0049	56034	58436	-	2402	CDS		penicillin-binding protein 2	0.000416146	1	3.29401e-05	chromosome 1	Cytoplasmic Membrane	M	map00550,map01501	PBP_dimer,Transpeptidase
Bphy_0050	58558	59070	-	512	CDS		rod shape-determining protein MreD	0.00194932	1	0.000154298	chromosome 1	Cytoplasmic Membrane	M	-	MreD
Bphy_0051	59067	60170	-	1103	CDS		rod shape-determining protein MreC	0	0	0	chromosome 1	Unknown	M	-	MreC
Bphy_0052	60289	61332	-	1043	CDS		rod shape-determining protein MreB	0.000957854	1	7.58191e-05	chromosome 1	Cytoplasmic	D	-	MreB_Mbl
Bphy_0054	62165	63658	+	1493	CDS		gatA ,aspartyl/glutamyl-tRNA amidotransferase subunit A	0.000669344	1	5.2982e-05	chromosome 1	Cytoplasmic	J	map00970,map01100	Amidase
Bphy_0055	63660	65135	+	1475	CDS		gatB ,aspartyl/glutamyl-tRNA amidotransferase subunit B	0	0	0	chromosome 1	Cytoplasmic	J	map00970,map01100	GatB_N,GatB_Yqey
Bphy_0061	70180	71325	-	1145	CDS		metX ,homoserine O-acetyltransferase	0.0061082	7	0.000483496	chromosome 1	Cytoplasmic	E	map00270,map01100,map01130	Abhydrolase_1
Bphy_0064	73262	74161	-	899	CDS		acetylglutamate kinase	0.00333333	3	0.00026385	chromosome 1	Cytoplasmic	F	map00220,map01100,map01110,map01130,map01210,map01230	AA_kinase
Bphy_0068	77830	78372	+	542	CDS		two component Fis family transcriptional regulator	0.0092081	5	0.000728869	chromosome 1	Cytoplasmic	T	map02020	HTH_8,Response_reg
Bphy_0071	80718	81137	-	419	CDS		TraR/DksA family transcriptional regulator	0.00238095	1	0.000188465	chromosome 1	Cytoplasmic	T	map02026	zf-dskA_traR
Bphy_0074	84294	85217	-	923	CDS		xerC ,site-specific tyrosine recombinase XerC	0.00324675	3	0.000256997	chromosome 1	Cytoplasmic	D	-	Phage_int_SAM_1,Phage_integrase
Bphy_0076	86034	86894	-	860	CDS	dapF	diaminopimelate epimerase	0.00116144	1	9.19339e-05	chromosome 1	Cytoplasmic	E	map00300,map01100,map01110,map01120,map01130,map01230	DAP_epimerase
Bphy_0077	86949	87833	-	884	CDS		lipid A biosynthesis lauroyl acyltransferase	0.00225989	2	0.000178882	chromosome 1	Cytoplasmic Membrane	M	map00540,map01100	Lip_A_acyltrans
Bphy_0078	88106	89293	+	1187	CDS		S-adenosylmethionine synthetase	0.00252525	3	0.000199887	chromosome 1	Cytoplasmic	H	map00270,map01100,map01110,map01230	S-AdoMet_synt_C,S-AdoMet_synt_M,S-AdoMet_synt_N
Bphy_0099	109090	109860	-	770	CDS		oxidoreductase FAD-binding subunit	0.0116732	9	0.00092399	chromosome 1	Cytoplasmic	CH	-	FAD_binding_6,NAD_binding_1
Bphy_0170	188981	190036	-	1055	CDS		biotin synthase	0.00757576	8	0.00059966	chromosome 1	Unknown (This protein may have multiple localization sites)	H	map00780,map01100	BATS,Radical_SAM
Bphy_0171	190073	190792	-	719	CDS		bioD ,dithiobiotin synthetase	0.00277778	2	0.000219875	chromosome 1	Cytoplasmic	H	map00780,map01100	AAA_26
Bphy_0172	190789	191973	-	1184	CDS		8-amino-7-oxononanoate synthase	0.000843882	1	6.67976e-05	chromosome 1	Unknown	H	map00780,map01100	Aminotran_1_2
Bphy_0173	191973	193319	-	1346	CDS		adenosylmethionine--8-amino-7-oxononanoate transaminase	0.00222717	3	0.000176292	chromosome 1	Cytoplasmic	H	map00780,map01100	Aminotran_3
Bphy_0188	209034	210818	-	1784	CDS	argS	,arginyl-tRNA synthetase	0.000560224	1	4.43446e-05	chromosome 1	Cytoplasmic	J	map00970	Arg_tRNA_synt_N,DALR_1,tRNA-synt_1d
Bphy_0203	226523	227392	-	869	CDS		pantothenate kinase	0.0091954	8	0.000727863	chromosome 1	Unknown	F	map00770,map00780,map01100	BPL_C,BPL_LplA_LipB,Pan_kinase
Bphy_0216	238110	238877	+	767	CDS		lipB ,lipoate-protein ligase B	0.0117188	9	0.000927599	chromosome 1	Cytoplasmic	H	map00785,map01100	BPL_LplA_LipB
Bphy_0217	238891	239895	+	1004	CDS		lipoyl synthase	0.000995025	1	7.87613e-05	chromosome 1	Cytoplasmic	H	map00785,map01100	LIAS_N,Radical_SAM
Bphy_0225	248341	249621	+	1280	CDS	dctA1	C4-dicarboxylate transporter DctA	0.00546448	7	0.000432542	chromosome 1	Cytoplasmic Membrane	C	map02020	SDF
Bphy_0226	249625	251676	+	2051	CDS		integral membrane sensor signal transduction histidine kinase	0.00389864	8	0.000308597	chromosome 1	Unknown (This protein may have multiple localization sites)	T	map02020	HATPase_c,HisKA,dCache_1
Bphy_0263	307568	308326	-	758	CDS		UBA/THIF-type NAD/FAD binding protein	0.0118577	9	0.000938598	chromosome 1	Cytoplasmic	H	map04122	ThiF
Bphy_0266	310518	311264	-	746	CDS		gpmA ,phosphoglyceromutase	0.0107095	8	0.000847712	chromosome 1	Cytoplasmic	F	map00010,map00260,map00680,map01100,map01110,map01120,map01130,map01200,map01230,map04922,map05230	His_Phos_1
Bphy_0270	312788	313786	+	998	CDS		gpsA ,NAD(P)H-dependent glycerol-3-phosphate dehydrogenase	0.01001	10	0.000792344	chromosome 1	Unknown	I	map00564,map01110	NAD_Gly3P_dh_C,NAD_Gly3P_dh_N
Bphy_0308	350900	352078	-	1178	CDS	ftsY	signal recognition particle-docking protein FtsY	0.00339271	4	0.00026855	chromosome 1	Cytoplasmic	U	map02024,map03060,map03070	SRP54,SRP54_N
Bphy_0310	353135	353641	+	506	CDS	coaD	phosphopantetheine adenylyltransferase	0.0118343	6	0.000936747	chromosome 1	Cytoplasmic	F	map00770,map01100	CTP_transf_like
Bphy_0313	355246	355848	-	602	CDS		peptidyl-tRNA hydrolase	0.00829187	5	0.000656344	chromosome 1	Cytoplasmic	J	-	Pept_tRNA_hydro
Bphy_0315	356737	357693	-	956	CDS		ribose-phosphate pyrophosphokinase	0.00104493	1	8.27117e-05	chromosome 1	Cytoplasmic	F	map00030,map00230,map01100,map01110,map01120,map01130,map01200,map01230	Pribosyl_synth,Pribosyltran_N
Bphy_0316	357869	358750	-	881	CDS		ipk ,4-diphosphocytidyl-2-C-methyl-D-erythritol kinase	0	0	0	chromosome 1	Cytoplasmic	F	map00900,map01100,map01110,map01130	GHMP_kinases_C,GHMP_kinases_N
Bphy_0317	358777	359409	-	632	CDS		lolB ,outer membrane lipoprotein LolB	0.00947867	6	0.000750286	chromosome 1	Unknown	M	-	LolB
Bphy_0324	366165	366680	-	515	CDS		putative PTS IIA-like nitrogen-regulatory protein PtsN	0.00581395	3	0.000460204	chromosome 1		G	map02060	PTS_EIIA_2
Bphy_0326	367463	368980	-	1517	CDS		RNA polymerase factor sigma-54	0.00329381	5	0.000260722	chromosome 1	Cytoplasmic	K	map02020,map05111	Sigma54_AID,Sigma54_CBD,Sigma54_DBD
Bphy_0327	369208	369990	-	782	CDS		ABC transporter-like protein	0	0	0	chromosome 1	Cytoplasmic	S	map02010	ABC_tran,BCA_ABC_TP_C
Bphy_0328	369987	370664	-	677	CDS		lipopolysaccharide transport periplasmic protein LptA	0	0	0	chromosome 1	Extracellular	S	-	OstA
Bphy_0329	370697	371290	-	593	CDS		hypothetical protein	0.0016835	1	0.000133258	chromosome 1	Unknown	S	-	LptC
Bphy_0341	385525	386043	+	518	CDS		single-stranded DNA-binding protein	0.00770713	4	0.000610059	chromosome 1	Cytoplasmic	L	map03030,map03430,map03440	SSB
Bphy_0370	418075	419598	-	1523	CDS		threonine dehydratase	0	0	0	chromosome 1	Cytoplasmic	E	map00260,map00290,map01100,map01110,map01130,map01200,map01230	PALP,Thr_dehydrat_C
Bphy_0371	420306	424421	+	4115	CDS		FAD linked oxidase domain-containing protein	0	0	0	chromosome 1	Cytoplasmic	C	-	CCG,DUF3400,DUF3683,FAD-oxidase_C,FAD_binding_4,Fer4_8
Bphy_0374	425374	426105	+	731	CDS		ubiE ,ubiquinone/menaquinone biosynthesis methyltransferase	0.00819672	6	0.000648813	chromosome 1	Cytoplasmic	H	map00130,map01100,map01110	Ubie_methyltran
Bphy_0377	427906	429489	+	1583	CDS		ubiB ,putative ubiquinone biosynthesis protein UbiB	0.00126263	2	9.99433e-05	chromosome 1	Cytoplasmic Membrane	H	-	ABC1
Bphy_0379	430292	430636	+	344	CDS		FmdB family regulatory protein	0.00289855	1	0.000229435	chromosome 1	Unknown	S	-	Zn-ribbon_8
Bphy_0380	430707	431363	+	656	CDS		hypothetical protein	0.00152207	1	0.00012048	chromosome 1	Cytoplasmic Membrane	S	-	DUF502
Bphy_0381	431436	433235	+	1799	CDS		aspS ,aspartyl-tRNA synthetase	0.000555556	1	4.39751e-05	chromosome 1	Cytoplasmic	J	map00970	GAD,tRNA-synt_2,tRNA_anti-codon
Bphy_0396	452101	454467	+	2366	CDS		organic solvent tolerance protein	0.000844951	2	6.68822e-05	chromosome 1	Outer Membrane	M	-	OstA,OstA_C
Bphy_0398	456029	457030	+	1001	CDS		pdxA ,4-hydroxythreonine-4-phosphate dehydrogenase	0.00798403	8	0.000631977	chromosome 1	Cytoplasmic	H	map00750,map01100	PdxA
Bphy_0404	461460	462017	-	557	CDS		D,D-heptose 1,7-bisphosphate phosphatase	0.00896057	5	0.000709275	chromosome 1	Cytoplasmic	E	map00540,map01100	Hydrolase,Hydrolase_like,PNK3P
Bphy_0405	462028	464127	-	2099	CDS		glyS ,glycyl-tRNA synthetase subunit beta	0	0	0	chromosome 1	Cytoplasmic	J	map00970	DALR_1,tRNA_synt_2f
Bphy_0406	464143	465150	-	1007	CDS		glyQ ,glycyl-tRNA synthetase subunit alpha	0.00198413	2	0.000157054	chromosome 1		J	map00970	tRNA-synt_2e
Bphy_0407	465377	467071	-	1694	CDS		lnt ,apolipoprotein N-acyltransferase	0	0	0	chromosome 1	Cytoplasmic Membrane	M	-	CN_hydrolase
Bphy_0440	500114	501190	+	1076	CDS		recA ,recombinase A	0.00371402	4	0.000293984	chromosome 1	Cytoplasmic	L	map03440	RecA
Bphy_0454	516441	517466	-	1025	CDS		lipopolysaccharide heptosyltransferase II	0.00584795	6	0.000462895	chromosome 1	Unknown	M	map00540,map01100	Glyco_transf_9
Bphy_0459	520452	521645	+	1193	CDS		pgk ,phosphoglycerate kinase	0.00167504	2	0.000132588	chromosome 1	Cytoplasmic	G	map00010,map00710,map01100,map01110,map01120,map01130,map01200,map01230	PGK
Bphy_0461	523822	524886	+	1064	CDS		fructose-1,6-bisphosphate aldolase	0.00375587	4	0.000297296	chromosome 1	Cytoplasmic	G	map00010,map00030,map00051,map00680,map00710,map01100,map01110,map01120,map01130,map01200,map01230	F_bP_aldolase
Bphy_0462	525017	525907	+	890	CDS		phosphoribosylaminoimidazole-succinocarboxamide synthase	0.00112233	1	8.88385e-05	chromosome 1	Cytoplasmic	F	map00230,map01100,map01110,map01130	SAICAR_synt
Bphy_0463	525932	526441	+	509	CDS		phosphoribosylaminoimidazole carboxylase, catalytic subunit	0.00980392	5	0.000776031	chromosome 1	Unknown	F	map00230,map01100,map01110,map01130	AIRC
Bphy_0464	526516	527724	+	1208	CDS		phosphoribosylaminoimidazole carboxylase ATPase subunit	0.00248139	3	0.000196415	chromosome 1	Cytoplasmic Membrane	F	map00230,map01100,map01110,map01130	ATP-grasp
Bphy_0465	527737	528780	+	1043	CDS		Sua5/YciO/YrdC/YwlC family protein	0.000957854	1	7.58191e-05	chromosome 1	Unknown	H	-	SUA5,Sua5_yciO_yrdC
Bphy_0485	553594	554385	-	791	CDS		ABC-3 protein	0.00757576	6	0.00059966	chromosome 1	Cytoplasmic Membrane	P	-	ABC-3
Bphy_0486	554378	555307	-	929	CDS		ABC transporter-like protein	0.00537634	5	0.000425565	chromosome 1	Cytoplasmic Membrane	P	-	ABC_tran
Bphy_0487	555304	556233	-	929	CDS		periplasmic solute binding protein	0.00107527	1	8.5113e-05	chromosome 1	Cytoplasmic Membrane	P	-	ZnuA
Bphy_0519	590711	592258	-	1547	CDS		N-acetylmuramoyl-L-alanine amidase	0.00129199	2	0.000102268	chromosome 1	Unknown	M	map01503	AMIN,Amidase_3
Bphy_0520	592240	592794	-	554	CDS		hypothetical protein	0	0	0	chromosome 1	Cytoplasmic	S	-	TsaE
Bphy_0526	597994	598626	+	632	CDS		putative glycerol-3-phosphate acyltransferase PlsY	0.0110585	7	0.000875333	chromosome 1	Cytoplasmic Membrane	I	map00561,map00564,map01100,map01110	G3P_acyltransf
Bphy_0528	599359	600399	+	1040	CDS		murB ,UDP-N-acetylenolpyruvoylglucosamine reductase	0.000960615	1	7.60376e-05	chromosome 1	Cytoplasmic	M	map00520,map00550,map01100	FAD_binding_4,MurB_C
Bphy_0529	600499	601428	-	929	CDS		ornithine carbamoyltransferase	0.00107527	1	8.5113e-05	chromosome 1	Cytoplasmic	E	map00220,map01100,map01110,map01130,map01230	OTCace,OTCace_N
Bphy_0531	602428	602706	-	278	CDS		rpsT ,30S ribosomal protein S20	0.00716846	2	0.00056742	chromosome 1	Cytoplasmic	J	map03010	Ribosomal_S20p
Bphy_0532	603187	604737	+	1550	CDS		integral membrane protein MviN	0.00128949	2	0.00010207	chromosome 1	Cytoplasmic Membrane	S	-	MVIN
Bphy_0535	606652	607317	-	665	CDS		adk ,adenylate kinase	0	0	0	chromosome 1	Cytoplasmic	F	map00230,map00730,map01100,map01110,map01130	ADK,ADK_lid
Bphy_0536	607579	608382	-	803	CDS		3-deoxy-manno-octulosonate cytidylyltransferase	0.00497512	4	0.000393807	chromosome 1	Periplasmic	M	map00540,map01100	CTP_transf_3
Bphy_0538	608698	609714	-	1016	CDS		tetraacyldisaccharide 4'-kinase	0	0	0	chromosome 1	Unknown	F	map00540,map01100	LpxK
Bphy_0540	611889	612467	+	578	CDS		superoxide dismutase	0.00518135	3	0.00041013	chromosome 1	Periplasmic	C	map03430,map04013,map04068,map04146,map04211,map04212,map04213,map05016	Sod_Fe_C,Sod_Fe_N
Bphy_0572	647802	649013	-	1211	CDS		bifunctional phosphopantothenoylcysteine decarboxylase/phosphopantothenate synthase	0.00660066	8	0.000522476	chromosome 1	Cytoplasmic	H	map00770,map01100	DFP,Flavoprotein
Bphy_0574	649663	652500	-	2837	CDS		ileS ,isoleucyl-tRNA synthetase	0	0	0	chromosome 1	Cytoplasmic	J	map00970	Anticodon_1,tRNA-synt_1,zf-FPG_IleRS
Bphy_0575	652688	653680	-	992	CDS		bifunctional riboflavin kinase/FMN adenylyltransferase	0.00503525	5	0.000398566	chromosome 1	Cytoplasmic	H	map00740,map01100,map01110	FAD_syn,Flavokinase
Bphy_0579	657363	658565	+	1202	CDS		fatty acid desaturase	0.00166251	2	0.000131596	chromosome 1		I	map01040,map01212,map03320,map04152,map04212	DDE_Tnp_ISL3,FA_desaturase
Bphy_0580	658697	659827	+	1130	CDS		quinolinate synthetase	0	0	0	chromosome 1	Cytoplasmic	H	map00760,map01100	NadA
Bphy_0581	659827	660729	+	902	CDS		nicotinate-nucleotide pyrophosphorylase	0.00110742	1	8.7658e-05	chromosome 1	Cytoplasmic	H	map00760,map01100	QRPTase_C,QRPTase_N
Bphy_0582	660810	662408	-	1598	CDS		L-aspartate oxidase	0.000625391	1	4.95029e-05	chromosome 1	Unknown (This protein may have multiple localization sites)	H	map00250,map00760,map01100	FAD_binding_2,Succ_DH_flav_C
Bphy_0584	662831	663064	-	233	CDS		rpmB ,50S ribosomal protein L28	0.0042735	1	0.00033827	chromosome 1	Cytoplasmic	J	map03010	Ribosomal_L28
Bphy_0586	664241	664696	+	455	CDS		FKBP-type peptidylprolyl isomerase	0.00657895	3	0.000520757	chromosome 1	Cytoplasmic	G	-	FKBP_C
Bphy_0587	664699	665658	+	959	CDS		ispH ,4-hydroxy-3-methylbut-2-enyl diphosphate reductase	0.00208333	2	0.000164907	chromosome 1	Cytoplasmic	IM	map00900,map01100,map01110,map01130	LYTB
Bphy_0605	683062	683898	+	836	CDS		undecaprenyl pyrophosphate phosphatase	0.00597372	5	0.00047285	chromosome 1	Cytoplasmic Membrane	V	map00550	BacA
Bphy_0618	694488	695006	-	518	CDS		ribH ,6,7-dimethyl-8-ribityllumazine synthase	0.00578035	3	0.000457544	chromosome 1	Cytoplasmic	H	map00740,map01100,map01110	DMRL_synthase
Bphy_0621	696986	698107	-	1121	CDS		riboflavin biosynthesis protein RibD	0	0	0	chromosome 1	Cytoplasmic	H	map00740,map01100,map01110,map02024	RibD_C,dCMP_cyt_deam_1
Bphy_0622	698147	699427	-	1280	CDS		glutamate-1-semialdehyde aminotransferase	0.00234192	3	0.000185375	chromosome 1	Cytoplasmic	H	map00860,map01100,map01110,map01120	Aminotran_3
Bphy_0634	712813	713814	-	1001	CDS		thioredoxin reductase	0.00399202	4	0.000315989	chromosome 1	Unknown (This protein may have multiple localization sites)	C	map00450	Pyr_redox_2
Bphy_0635	714314	716581	+	2267	CDS		cell division FtsK/SpoIIIE	0.00661376	15	0.000523513	chromosome 1		D	-	FtsK_4TM,FtsK_SpoIIIE,Ftsk_gamma
Bphy_0636	716618	717313	+	695	CDS		lolA ,outer-membrane lipoprotein carrier protein	0.00574713	4	0.000454915	chromosome 1	Unknown	M	-	LolA
Bphy_0642	724326	725624	+	1298	CDS		seryl-tRNA synthetase	0	0	0	chromosome 1	Cytoplasmic	J	map00970	Seryl_tRNA_N,tRNA-synt_2b
Bphy_0669	754746	755432	+	686	CDS		gmk ,guanylate kinase	0.00727802	5	0.000576093	chromosome 1	Cytoplasmic	F	map00230,map01100	Guanylate_kin
Bphy_0671	755774	758158	+	2384	CDS	spoT	(p)ppGpp synthetase I SpoT/RelA	0.00838574	20	0.000663775	chromosome 1	Cytoplasmic	KT	map00230	ACT_4,HD_4,RelA_SpoT,TGS
Bphy_0685	769912	770928	-	1016	CDS		fructose-1,6-bisphosphatase	0.00294985	3	0.000233496	chromosome 1	Unknown	G	map00010,map00030,map00051,map00680,map00710,map01100,map01110,map01120,map01130,map01200,map04152,map04910	FBPase
Bphy_0737	830843	831490	-	647	CDS		OmpA/MotB domain-containing protein	0.00771605	5	0.000610765	chromosome 1	Outer Membrane	M	-	OmpA
Bphy_0738	832056	834635	+	2579	CDS		DNA gyrase subunit A	0	0	0	chromosome 1	Cytoplasmic	L	-	DNA_gyraseA_C,DNA_topoisoIV
Bphy_0740	835573	836655	+	1082	CDS		phosphoserine aminotransferase	0.00184672	2	0.000146178	chromosome 1	Cytoplasmic	E	map00260,map00680,map00750,map01100,map01120,map01130,map01200,map01230	Aminotran_5
Bphy_0741	836728	837810	+	1082	CDS		chorismate mutase	0.00184672	2	0.000146178	chromosome 1	Cytoplasmic	E	map00400,map01100,map01110,map01130,map01230	ACT,CM_2,PDT
Bphy_0743	839013	840017	+	1004	CDS		prephenate dehydrogenase	0	0	0	chromosome 1		E	map00400,map00401,map01100,map01110,map01130,map01230	PDH
Bphy_0744	840037	841341	+	1304	CDS		3-phosphoshikimate 1-carboxyvinyltransferase	0.00229885	3	0.000181966	chromosome 1	Cytoplasmic	E	map00400,map01100,map01110,map01130,map01230	Cytidylate_kin,EPSP_synthase
Bphy_0745	841390	842076	+	686	CDS		cmk ,cytidylate kinase	0	0	0	chromosome 1	Cytoplasmic	F	map00240,map01100	Cytidylate_kin
Bphy_0746	842190	843959	+	1769	CDS		rpsA ,30S ribosomal protein S1	0	0	0	chromosome 1		J	map03010	S1
Bphy_0749	844987	846162	+	1175	CDS		tetratricopeptide repeat-containing protein	0.00340136	4	0.000269235	chromosome 1	Cytoplasmic	G	-	TPR_16,TPR_7
Bphy_0751	847658	848620	+	962	CDS		rfaE bifunctional protein	0.00207684	2	0.000164393	chromosome 1		M	map00540,map01100	CTP_transf_like,PfkB
Bphy_0752	848702	849694	+	992	CDS		ADP-L-glycero-D-manno-heptose-6-epimerase	0.00302115	3	0.000239139	chromosome 1	Cytoplasmic	F	map00540,map01100	Epimerase
Bphy_0754	850444	851346	+	902	CDS	cysM	cysteine synthase B	0.00664452	6	0.000525948	chromosome 1	Cytoplasmic	E	map00270,map00920,map01100,map01110,map01120,map01130,map01200,map01230	PALP
Bphy_0762	858506	859255	+	749	CDS		electron transfer flavoprotein alpha/beta-subunit	0.00533333	4	0.000422161	chromosome 1	Cytoplasmic	C	-	ETF
Bphy_0763	859283	860218	+	935	CDS		electron transfer flavoprotein subunit alpha	0	0	0	chromosome 1	Cytoplasmic	C	-	ETF,ETF_alpha
Bphy_0769	866299	866553	+	254	CDS		rpsP ,30S ribosomal protein S16	0	0	0	chromosome 1	Cytoplasmic	J	map03010	Ribosomal_S16
Bphy_0770	866650	867345	+	695	CDS		rimM ,16S rRNA-processing protein RimM	0	0	0	chromosome 1	Cytoplasmic	J	-	PRC,RimM
Bphy_0771	867370	868137	+	767	CDS		trmD ,tRNA (guanine-N(1)-)-methyltransferase	0.00130208	1	0.000103067	chromosome 1	Cytoplasmic	J	-	tRNA_m1G_MT
Bphy_0776	870949	871902	-	953	CDS		ribosome-associated GTPase	0.00524109	5	0.000414859	chromosome 1	Cytoplasmic	S	map00730,map01100	RsgA_GTPase
Bphy_0788	884570	885541	+	971	CDS		thyA ,thymidylate synthase	0.00308642	3	0.000244306	chromosome 1	Cytoplasmic	F	map00240,map00670,map01100,map01523	Thymidylat_synt
Bphy_0826	925980	926159	+	179	CDS		50S ribosomal protein L32	0.0111111	2	0.000879501	chromosome 1	Cytoplasmic	J	map03010	Ribosomal_L32p
Bphy_0827	926296	927426	+	1130	CDS		putative glycerol-3-phosphate acyltransferase PlsX	0.000884173	1	6.99869e-05	chromosome 1	Cytoplasmic	I	map00561,map00564,map01100,map01110	FA_synthesis
Bphy_0828	927426	928415	+	989	CDS		3-oxoacyl-(acyl carrier protein) synthase III	0.0010101	1	7.99547e-05	chromosome 1	Cytoplasmic	I	map00061,map01100,map01212	ACP_syn_III,ACP_syn_III_C
Bphy_0829	928509	929441	+	932	CDS		malonyl CoA-acyl carrier protein transacylase	0.00321543	3	0.000254518	chromosome 1	Cytoplasmic	I	map00061,map00333,map01100,map01130,map01212	Acyl_transf_1
Bphy_0830	929507	930256	+	749	CDS		fabG ,3-ketoacyl-(acyl-carrier-protein) reductase	0.00266667	2	0.00021108	chromosome 1	Cytoplasmic	IQ	map00061,map00333,map00780,map01040,map01100,map01130,map01212	adh_short_C2
Bphy_0831	930404	930643	+	239	CDS	acpP	acpP ,acyl carrier protein	0	0	0	chromosome 1	Cytoplasmic	IQ	-	PP-binding
Bphy_0832	930949	932235	+	1286	CDS		3-oxoacyl-(acyl carrier protein) synthase II	0.001554	2	0.000123007	chromosome 1		I	map00061,map00780,map01100,map01212	Ketoacyl-synt_C,ketoacyl-synt
Bphy_0840	939028	939921	+	893	CDS		signal peptidase I	0.00559284	5	0.000442702	chromosome 1	Cytoplasmic Membrane	U	map02024,map03060	Peptidase_S24,Peptidase_S26
Bphy_0841	940073	941398	+	1325	CDS		ribonuclease III	0.00829563	11	0.000656641	chromosome 1		J	map03008,map05205	Ribonucleas_3_3,dsrm
Bphy_0842	941499	942362	+	863	CDS	era	GTP-binding protein Era	0.00231481	2	0.000183229	chromosome 1	Cytoplasmic Membrane	M	-	KH_2,MMR_HSR1
Bphy_0844	943356	944120	+	764	CDS		pyridoxine 5'-phosphate synthase	0.00522876	4	0.000413883	chromosome 1	Cytoplasmic	H	map00750,map01100	PdxJ
Bphy_0849	947743	948300	-	557	CDS		elongation factor P	0.00716846	4	0.00056742	chromosome 1	Cytoplasmic	J	-	EFP,EFP_N,Elong-fact-P_C
Bphy_0850	948629	949810	-	1181	CDS		hypothetical protein	0.00423012	5	0.000334836	chromosome 1	Cytoplasmic	S	-	DUF2331
Bphy_0852	952283	952873	+	590	CDS		CDP-diacylglycerol--glycerol-3-phosphate 3-phosphatidyltransferase	0.00676819	4	0.000535737	chromosome 1	Cytoplasmic Membrane	I	map00564,map01100	CDP-OH_P_transf
Bphy_0853	952978	953121	-	143	CDS		hypothetical protein	0	0	0	chromosome 1
Bphy_0858	956492	957241	+	749	CDS		HAD family hydrolase	0.00533333	4	0.000422161	chromosome 1	Unknown	G	map00500,map01100	Trehalose_PPase
Bphy_0867	967768	968517	-	749	CDS		DNA polymerase III subunit epsilon	0.008	6	0.000633241	chromosome 1	Cytoplasmic	L	map00230,map00240,map01100,map03030,map03430,map03440	RNase_T
Bphy_0873	974454	975608	+	1154	CDS		carbamoyl phosphate synthase small subunit	0	0	0	chromosome 1	Unknown	F	map00240,map00250,map01100	CPSase_sm_chain,GATase
Bphy_0874	975730	978984	+	3254	CDS	carB	carbamoyl phosphate synthase large subunit	0.000921659	3	7.2954e-05	chromosome 1	Unknown (This protein may have multiple localization sites)	F	map00240,map00250,map01100	CPSase_L_D2,CPSase_L_D3,MGS
Bphy_0879	981969	983858	+	1889	CDS		ATP-dependent metalloprotease FtsH	0.000529101	1	4.1881e-05	chromosome 1	Cytoplasmic Membrane	O	-	AAA,FtsH_ext,Peptidase_M41
Bphy_0880	984031	984873	+	842	CDS		dihydropteroate synthase	0.00118624	1	9.3897e-05	chromosome 1	Cytoplasmic	H	map00790,map01100	Pterin_bind
Bphy_0881	984902	986260	+	1358	CDS		glmM ,phosphoglucosamine mutase	0.00220751	3	0.000174735	chromosome 1	Cytoplasmic	G	map00520,map01100,map01130	PGM_PMM_I,PGM_PMM_II,PGM_PMM_III,PGM_PMM_IV
Bphy_0907	1009819	1011540	-	1721	CDS		glutaminyl-tRNA synthetase	0.00058072	1	4.5967e-05	chromosome 1	Cytoplasmic	J	map00970,map01100	tRNA-synt_1c,tRNA-synt_1c_C
Bphy_0911	1014115	1014489	+	374	CDS		rpsF ,30S ribosomal protein S6	0	0	0	chromosome 1	Cytoplasmic	J	map03010	Ribosomal_S6
Bphy_0912	1014555	1014854	+	299	CDS		putative primosomal replication protein N	0	0	0	chromosome 1	Unknown	L	map03440	SSB
Bphy_0913	1014857	1015132	+	275	CDS		rpsR ,30S ribosomal protein S18	0.00724638	2	0.000573588	chromosome 1	Cytoplasmic	J	map03010	Ribosomal_S18
Bphy_0915	1015784	1017172	+	1388	CDS		replicative DNA helicase	0.00287977	4	0.000227949	chromosome 1	Cytoplasmic	L	map03030,map04112	DnaB,DnaB_C
Bphy_0922	1024201	1025097	-	896	CDS		polysaccharide deacetylase	0.00557414	5	0.000441221	chromosome 1	Cytoplasmic	G	-	Polysacc_deac_1
Bphy_0923	1025110	1026156	-	1046	CDS		NAD-dependent epimerase/dehydratase family protein	0	0	0	chromosome 1		GM	-	Epimerase
Bphy_0924	1026153	1027088	-	935	CDS		putative formyltransferase	0	0	0	chromosome 1	Periplasmic	J	map00670,map00970	Formyl_trans_C,Formyl_trans_N
Bphy_0925	1027085	1028134	-	1049	CDS		glycosyl transferase family protein	0.00571429	6	0.000452315	chromosome 1	Cytoplasmic Membrane	M	map00520,map01503	Glycos_transf_2
Bphy_0926	1028153	1029304	-	1151	CDS		DegT/DnrJ/EryC1/StrS aminotransferase	0.00173611	2	0.000137422	chromosome 1	Cytoplasmic	E	-	DegT_DnrJ_EryC1
Bphy_0928	1029961	1031763	-	1802	CDS		glycosyl transferase family protein	0.00110926	2	8.78038e-05	chromosome 1	Cytoplasmic Membrane	M	-	PMT,PMT_2
Bphy_0931	1034336	1035667	+	1331	CDS		homoserine dehydrogenase	0	0	0	chromosome 1	Cytoplasmic	E	map00260,map00270,map00300,map01100,map01110,map01120,map01130,map01230	ACT,Homoserine_dh,NAD_binding_3
Bphy_0932	1035698	1037146	+	1448	CDS		threonine synthase	0.00138026	2	0.000109255	chromosome 1	Cytoplasmic	E	map00260,map00750,map01100,map01110,map01120,map01230	PALP,Thr_synth_N
Bphy_0946	1056378	1058135	-	1757	CDS		putative inner membrane protein	0.00113766	2	9.00513e-05	chromosome 1	Cytoplasmic Membrane	M	-	-
Bphy_0949	1059870	1061132	-	1262	CDS		rho ,transcription termination factor Rho	0.00158353	2	0.000125345	chromosome 1	Cytoplasmic	K	map03018	ATP-synt_ab,Rho_N,Rho_RNA_bind
Bphy_0950	1061421	1061747	-	326	CDS		thioredoxin	0.00917431	3	0.000726194	chromosome 1	Cytoplasmic	O	map04621,map05418	Thioredoxin
Bphy_0951	1062461	1064842	+	2381	CDS		DNA polymerase III subunits gamma and tau	0	0	0	chromosome 1	Cytoplasmic	L	map00230,map00240,map01100,map03030,map03430,map03440	DNA_pol3_delta2,DNA_pol3_gamma3,DNA_pol3_tau_5
Bphy_0961	1073191	1074129	+	938	CDS		peptidase M23B	0	0	0	chromosome 1	Outer Membrane	DM	-	LysM,Peptidase_M23
Bphy_0963	1075247	1076023	+	776	CDS		3'-5' exonuclease	0.00900901	7	0.000713109	chromosome 1	Cytoplasmic	L	-	DNA_pol_B_exo2
Bphy_0966	1078642	1079499	-	857	CDS		putative competence lipoprotein, ComL	0.00699301	6	0.000553532	chromosome 1	Unknown (This protein may have multiple localization sites)	M	-	YfiO
Bphy_0978	1093273	1094112	-	839	CDS		phosphoserine phosphatase SerB	0.00357143	3	0.000282697	chromosome 1	Cytoplasmic	E	map00260,map00680,map01100,map01120,map01130,map01200,map01230	DUF4072,HAD
Bphy_0998	1120787	1121497	+	710	CDS		ispD ,2-C-methyl-D-erythritol 4-phosphate cytidylyltransferase	0.00421941	3	0.000333988	chromosome 1	Unknown	I	map00900,map01100,map01110,map01130	IspD
Bphy_0999	1121567	1122046	+	479	CDS		ispF ,2-C-methyl-D-erythritol 2,4-cyclodiphosphate synthase	0.0104167	5	0.000824533	chromosome 1	Cytoplasmic	I	map00900,map01100,map01110,map01130	YgbB
Bphy_1011	1133680	1134339	+	659	CDS	clpP	clpP ,ATP-dependent Clp protease proteolytic subunit	0.0030303	2	0.000239864	chromosome 1	Cytoplasmic	O	map04112,map04212	CLP_protease
Bphy_1013	1136002	1138419	+	2417	CDS		ATP-dependent protease La	0.00744417	18	0.000589244	chromosome 1	Cytoplasmic	O	map04112	AAA,LON_substr_bdg,Lon_C
Bphy_1019	1143453	1145075	-	1622	CDS		pgi ,glucose-6-phosphate isomerase	0.00123229	2	9.75417e-05	chromosome 1	Cytoplasmic	G	map00010,map00030,map00500,map00520,map01100,map01110,map01120,map01130,map01200	PGI
Bphy_1022	1148831	1152910	+	4079	CDS		phosphoribosylformylglycinamidine synthase	0.000245098	1	1.94008e-05	chromosome 1	Cytoplasmic	F	map00230,map01100,map01110,map01130	AIRS_C,GATase_5
Bphy_1025	1154309	1154839	-	530	CDS		intracellular septation protein A	0.00753296	4	0.000596272	chromosome 1	Cytoplasmic Membrane	D	-	IspA
Bphy_1041	1170425	1171474	-	1049	CDS		putative glycine cleavage T protein (aminomethyltransferase)	0.0104762	11	0.000829244	chromosome 1	Unknown	S	-	GCV_T,GCV_T_C
Bphy_1043	1172562	1173182	+	620	CDS		tmk ,thymidylate kinase	0.0112721	7	0.000892248	chromosome 1	Cytoplasmic	F	map00240,map01100	Thymidylate_kin
Bphy_1044	1173278	1174327	+	1049	CDS		DNA polymerase III subunit delta'	0.00666667	7	0.000527701	chromosome 1	Cytoplasmic	L	map00230,map00240,map01100,map03030,map03430,map03440	DNA_pol3_delta2,DNApol3-delta_C
Bphy_1189	1335765	1337120	-	1355	CDS		integral membrane sensor signal transduction histidine kinase	0.00589971	8	0.000466992	chromosome 1		T	-	HAMP,HATPase_c,HisKA
Bphy_1305	1464034	1464675	-	641	CDS		zinc-binding CMP/dCMP deaminase	0.0109034	7	0.000863062	chromosome 1		FJ	map00361,map00625,map01100,map01120	Abhydrolase_1,MafB19-deam,TfoX_C
Bphy_1312	1470105	1471688	-	1583	CDS		guaA ,GMP synthase	0	0	0	chromosome 1	Cytoplasmic	F	map00230,map00983,map01100	GATase,GMP_synt_C,NAD_synthase
Bphy_1313	1471901	1472725	-	824	CDS		hypothetical protein	0.00484848	4	0.000383782	chromosome 1	Cytoplasmic Membrane	-	-	-
Bphy_1314	1472732	1474192	-	1460	CDS		inosine 5'-monophosphate dehydrogenase	0.000684463	1	5.41787e-05	chromosome 1	Cytoplasmic	F	map00230,map00983,map01100,map01110	CBS,IMPDH,NMO
Bphy_1317	1475894	1476283	-	389	CDS		cyclase/dehydrase	0.0102564	4	0.000811847	chromosome 1		I	-	Polyketide_cyc
Bphy_1318	1476463	1476909	+	446	CDS		smpB ,SsrA-binding protein	0	0	0	chromosome 1	Cytoplasmic	J	-	SmpB
Bphy_1321	1478543	1480948	-	2405	CDS		phosphoenolpyruvate synthase	0	0	0	chromosome 1	Cytoplasmic	H	map00620,map00680,map00720,map01100,map01120,map01200	PEP-utilizers,PEP-utilizers_C,PPDK_N
Bphy_1322	1481326	1482159	+	833	CDS		hypothetical protein	0.00959233	8	0.000759282	chromosome 1		F	-	Kinase-PPPase
Bphy_1325	1483799	1484968	-	1169	CDS		lpxB ,lipid-A-disaccharide synthase	0	0	0	chromosome 1	Cytoplasmic	M	map00540,map01100	LpxB
Bphy_1326	1484972	1485760	-	788	CDS		UDP-N-acetylglucosamine acyltransferase	0.00126743	1	0.000100323	chromosome 1	Cytoplasmic	M	map00540,map01100,map01503	Acetyltransf_11,Hexapep
Bphy_1327	1485929	1486390	-	461	CDS		fabZ ,(3R)-hydroxymyristoyl-ACP dehydratase	0.004329	2	0.000342663	chromosome 1	Cytoplasmic	I	map00061,map00780,map01100,map01212	FabA
Bphy_1328	1486560	1487636	-	1076	CDS		lpxD ,UDP-3-O-[3-hydroxymyristoyl] glucosamine N-acyltransferase	0	0	0	chromosome 1	Unknown	M	map00540,map01100	Hexapep,Hexapep_2,LpxD
Bphy_1329	1487737	1488273	-	536	CDS		outer membrane chaperone Skp	0	0	0	chromosome 1		M	-	OmpH
Bphy_1330	1488315	1490627	-	2312	CDS		outer membrane protein assembly complex, YaeT protein	0	0	0	chromosome 1	Outer Membrane	M	-	Bac_surface_Ag,POTRA
Bphy_1331	1490693	1492081	-	1388	CDS		membrane-associated zinc metalloprotease	0	0	0	chromosome 1	Cytoplasmic Membrane	M	map02024,map04112	PDZ,PDZ_2,Peptidase_M50
Bphy_1332	1492089	1493294	-	1205	CDS		1-deoxy-D-xylulose 5-phosphate reductoisomerase	0	0	0	chromosome 1	Cytoplasmic	I	map00900,map01100,map01110,map01130	DXPR_C,DXP_redisom_C,DXP_reductoisom
Bphy_1333	1493317	1494138	-	821	CDS		phosphatidate cytidylyltransferase	0	0	0	chromosome 1	Cytoplasmic Membrane	I	map00564,map01100,map01110,map04070	CTP_transf_1
Bphy_1334	1494132	1494914	-	782	CDS		undecaprenyl diphosphate synthase	0.00255428	2	0.000202184	chromosome 1	Cytoplasmic	H	map00900,map01110	Prenyltransf
Bphy_1335	1494986	1495546	-	560	CDS		frr ,ribosome recycling factor	0	0	0	chromosome 1	Cytoplasmic	J	-	RRF
Bphy_1336	1495639	1496352	-	713	CDS		pyrH ,uridylate kinase	0.00140056	1	0.000110862	chromosome 1	Unknown	F	map00240,map01100	AA_kinase
Bphy_1337	1496596	1497477	-	881	CDS		tsf ,elongation factor Ts	0.00793651	7	0.000628215	chromosome 1	Cytoplasmic	J	-	EF_TS
Bphy_1338	1497671	1498423	-	752	CDS		rpsB ,30S ribosomal protein S2	0	0	0	chromosome 1	Cytoplasmic	J	map03010	Ribosomal_S2
Bphy_1340	1499680	1502259	+	2579	CDS		PII uridylyl-transferase	0.0104651	27	0.000828368	chromosome 1	Cytoplasmic	O	map02020	ACT,GlnD_UR_UTase,HD,NTP_transf_2
Bphy_1343	1504744	1506795	-	2051	CDS		DNA ligase, NAD-dependent	0	0	0	chromosome 1	Cytoplasmic	L	map03030,map03410,map03420,map03430	BRCT,DNA_ligase_OB,DNA_ligase_ZBD,DNA_ligase_aden,HHH_2,HHH_5
Bphy_1346	1509438	1512956	-	3518	CDS		chromosome segregation protein SMC	0	0	0	chromosome 1	Cytoplasmic	D	-	SMC_N,SMC_hinge
Bphy_1349	1515816	1516643	+	827	CDS	dapD	2,3,4,5-tetrahydropyridine-2,6-carboxylate N-succinyltransferase	0.00483092	4	0.000382392	chromosome 1	Cytoplasmic	E	map00300,map01100,map01120,map01230	Hexapep,Hexapep_2,THDPS_N_2
Bphy_1351	1517107	1518246	+	1139	CDS		succinyl-diaminopimelate desuccinylase	0.00175439	2	0.000138869	chromosome 1	Cytoplasmic	E	map00300,map01100,map01120,map01230	M20_dimer,Peptidase_M20
Bphy_1359	1526499	1527590	-	1091	CDS	alr	alanine racemase	0.000915751	1	7.24864e-05	chromosome 1		E	map00473,map01100,map01502	Ala_racemase_C,Ala_racemase_N
Bphy_1360	1527789	1529096	+	1307	CDS		lysophospholipid transporter LplT	0	0	0	chromosome 1	Cytoplasmic Membrane	EGP	-	MFS_1
Bphy_1361	1529176	1529982	+	806	CDS		phosphomethylpyrimidine kinase	0.00371747	3	0.000294257	chromosome 1	Unknown	H	map00730,map01100	Phos_pyr_kin
Bphy_1377	1545637	1547046	-	1409	CDS		gltX ,glutamyl-tRNA synthetase	0	0	0	chromosome 1	Cytoplasmic	J	map00860,map00970,map01100,map01110,map01120	tRNA-synt_1c
Bphy_1379	1548464	1549135	-	671	CDS		NLP/P60 protein	0.0119048	8	0.000942323	chromosome 1	Unknown	M	-	NLPC_P60
Bphy_1384	1555179	1555970	+	791	CDS		enoyl-(acyl carrier protein) reductase	0.00505051	4	0.000399773	chromosome 1	Cytoplasmic Membrane	I	map00061,map00333,map00780,map01100,map01130,map01212	adh_short_C2
Bphy_1386	1557140	1558390	-	1250	CDS		aspartate kinase	0	0	0	chromosome 1	Cytoplasmic	E	map00260,map00261,map00270,map00300,map01100,map01110,map01120,map01130,map01210,map01230	AA_kinase,ACT,ACT_7
Bphy_1387	1558863	1560281	-	1418	CDS		tRNA(Ile)-lysidine synthetase	0.00140944	2	0.000111565	chromosome 1	Cytoplasmic	D	-	ATP_bind_3,TilS,TilS_C
Bphy_1388	1560327	1561298	-	971	CDS		acetyl-CoA carboxylase carboxyltransferase subunit alpha	0	0	0	chromosome 1	Cytoplasmic	I	map00061,map00620,map00640,map00720,map01100,map01110,map01120,map01130,map01200,map01212	ACCA
Bphy_1390	1562527	1563924	-	1397	CDS	cysS	cysteinyl-tRNA synthetase	0	0	0	chromosome 1	Cytoplasmic	J	map00970	DALR_2,tRNA-synt_1e,tRNA-synt_1g
Bphy_1391	1564087	1564983	+	896	CDS		TPR repeat-containing protein	0.00780379	7	0.00061771	chromosome 1		S	-	DUF4440,TPR_11,TPR_16,TPR_17,TPR_19,TPR_2,TPR_6,TPR_8
Bphy_1394	1566355	1567155	+	800	CDS		UDP-2,3-diacylglucosamine hydrolase	0.0062422	5	0.000494102	chromosome 1	Cytoplasmic	S	map00540,map01100	Metallophos,Metallophos_2
Bphy_1397	1569484	1570287	+	803	CDS		inositol-phosphate phosphatase	0.00248756	2	0.000196903	chromosome 1	Cytoplasmic	G	map00521,map00562,map01100,map04070	Inositol_P
Bphy_1407	1584877	1586763	-	1886	CDS		K potassium transporter	0	0	0	chromosome 1	Cytoplasmic Membrane	P	-	K_trans
Bphy_1409	1587671	1589017	-	1346	CDS		adenylosuccinate synthetase	0	0	0	chromosome 1	Cytoplasmic	F	map00230,map00250,map01100	Adenylsucc_synt
Bphy_1410	1589227	1590378	-	1151	CDS		hisZ ,ATP phosphoribosyltransferase regulatory subunit	0.000868056	1	6.87111e-05	chromosome 1	Cytoplasmic	E	map00340,map01100,map01110,map01230	tRNA-synt_His
Bphy_1411	1590646	1590837	-	191	CDS		hypothetical protein	0.00520833	1	0.000412266	chromosome 1	Cytoplasmic Membrane	S	-	DUF2065
Bphy_1412	1590881	1591795	-	914	CDS		hypothetical protein	0	0	0	chromosome 1	Periplasmic	O	-	Band_7
Bphy_1413	1591806	1593203	-	1397	CDS		HflK protein	0.00214592	3	0.000169861	chromosome 1	Unknown	O	-	Band_7,HflK_N
Bphy_1416	1594964	1596304	-	1340	CDS		engA ,GTP-binding protein EngA	0.000745712	1	5.90269e-05	chromosome 1	Cytoplasmic	S	-	KH_dom-like,MMR_HSR1
Bphy_1417	1596705	1597865	-	1160	CDS		outer membrane assembly lipoprotein YfgL	0.000861326	1	6.81784e-05	chromosome 1		M	-	PQQ_2,PQQ_3
Bphy_1418	1597919	1598545	-	626	CDS		hypothetical protein	0	0	0	chromosome 1	Unknown	S	-	TPR_21
Bphy_1419	1598632	1599972	-	1340	CDS		hisS ,histidyl-tRNA synthetase	0.000745712	1	5.90269e-05	chromosome 1	Cytoplasmic	J	map00970	HGTP_anticodon,tRNA-synt_His
Bphy_1420	1600006	1601319	-	1313	CDS		ispG ,4-hydroxy-3-methylbut-2-en-1-yl diphosphate synthase	0	0	0	chromosome 1	Cytoplasmic	I	map00900,map01100,map01110,map01130	GcpE
Bphy_1421	1601443	1602552	-	1109	CDS		XRE family transcriptional regulator	0.00900901	10	0.000713109	chromosome 1	Periplasmic	S	-	DUF4115,HTH_25
Bphy_1422	1602762	1603910	-	1148	CDS		radical SAM protein	0.00435161	5	0.000344452	chromosome 1	Cytoplasmic	J	-	Radical_SAM
Bphy_1423	1604019	1604444	-	425	CDS		ndk ,nucleoside diphosphate kinase	0.00234742	1	0.00018581	chromosome 1	Extracellular	F	map00230,map00240,map00983,map01100,map01110,map01130,map04016	NDK
Bphy_1429	1609188	1610390	-	1202	CDS		tryptophanyl-tRNA synthetase	0.00166251	2	0.000131596	chromosome 1	Cytoplasmic	J	map00970	tRNA-synt_1b
Bphy_1439	1617530	1618813	-	1283	CDS		eno ,phosphopyruvate hydratase	0	0	0	chromosome 1	Cytoplasmic	F	map00010,map00680,map01100,map01110,map01120,map01130,map01200,map01230,map03018,map04066	Enolase_C,Enolase_N
Bphy_1440	1618953	1619807	-	854	CDS		2-dehydro-3-deoxyphosphooctonate aldolase	0	0	0	chromosome 1	Cytoplasmic	M	map00540,map01100	DAHP_synth_1
Bphy_1441	1619804	1621465	-	1661	CDS		pyrG ,CTP synthetase	0.00300842	5	0.000238132	chromosome 1	Cytoplasmic	F	map00240,map01100	CTP_synth_N,GATase
Bphy_1445	1625914	1626657	-	743	CDS		lipoprotein releasing system, ATP-binding protein	0	0	0	chromosome 1	Cytoplasmic Membrane	V	map02010	ABC_tran
Bphy_1446	1626650	1627903	-	1253	CDS		LolC/E family lipoprotein releasing system, transmembrane protein	0.00318979	4	0.000252488	chromosome 1	Cytoplasmic Membrane	M	map02010	FtsX,MacB_PCD
Bphy_1449	1631751	1632830	+	1079	CDS		peptide chain release factor 2	0.00277778	3	0.000219875	chromosome 1		J	-	PCRF,RF-1
Bphy_1450	1632938	1634476	+	1538	CDS		lysS ,lysyl-tRNA synthetase	0	0	0	chromosome 1	Cytoplasmic	J	map00970	tRNA-synt_2,tRNA_anti-codon
Bphy_1454	1636286	1638157	-	1871	CDS		hscA ,chaperone protein HscA	0	0	0	chromosome 1	Cytoplasmic	O	-	HSP70
Bphy_1455	1638249	1638776	-	527	CDS		hscB ,co-chaperone HscB	0	0	0	chromosome 1	Unknown	O	-	DnaJ,HSCB_C
Bphy_1456	1638894	1639250	-	356	CDS		iron-sulfur cluster assembly protein IscA	0	0	0	chromosome 1		S	-	Fe-S_biosyn
Bphy_1457	1639365	1639772	-	407	CDS		FeS cluster assembly scaffold IscU	0	0	0	chromosome 1	Unknown	C	-	NifU_N
Bphy_1458	1639832	1641055	-	1223	CDS		cysteine desulfurase	0	0	0	chromosome 1	Cytoplasmic	E	map00730,map01100,map04122	Aminotran_5
Bphy_1459	1641125	1641649	-	524	CDS		BadM/Rrf2 family transcriptional regulator	0.00571429	3	0.000452315	chromosome 1	Unknown	K	-	Rrf2
Bphy_1469	1651989	1653635	-	1646	CDS		dihydrolipoamide acetyltransferase	0	0	0	chromosome 1	Unknown (This protein may have multiple localization sites)	C	map00010,map00020,map00620,map01100,map01110,map01120,map01130,map01200	2-oxoacid_dh,Biotin_lipoyl,E3_binding
Bphy_1470	1653718	1656417	-	2699	CDS	aceE	aceE ,pyruvate dehydrogenase subunit E1	0	0	0	chromosome 1	Cytoplasmic	C	map00010,map00020,map00620,map01100,map01110,map01120,map01130,map01200	Transketolase_N
Bphy_1471	1656683	1659208	+	2525	CDS		multi-sensor signal transduction histidine kinase	0.00712589	18	0.000564051	chromosome 1		T	-	HATPase_c,HisKA,PAS,PAS_4,PAS_8,PAS_9
Bphy_1475	1662868	1663725	+	857	CDS		methenyltetrahydrofolate cyclohydrolase	0	0	0	chromosome 1	Cytoplasmic	F	map00670,map00720,map01100,map01120,map01200	THF_DHG_CYH,THF_DHG_CYH_C
Bphy_1479	1669029	1670543	-	1514	CDS	ntrC	nitrogen metabolism transcriptional regulator NtrC	0.00792079	12	0.000626971	chromosome 1	Cytoplasmic	T	map02020	HTH_8,Response_reg,Sigma54_activat
Bphy_1481	1671882	1673297	-	1415	CDS		glutamine synthetase, type I	0	0	0	chromosome 1	Cytoplasmic	E	map00220,map00250,map00627,map00630,map00910,map01100,map01120,map01230,map02020,map04217,map04724,map04727	Gln-synt_C,Gln-synt_N
Bphy_1489	1684811	1686190	+	1379	CDS		N-acetylglutamate synthase	0.00217391	3	0.000172076	chromosome 1	Cytoplasmic	E	map00220,map01100,map01110,map01130,map01210,map01230	AA_kinase,Acetyltransf_1
Bphy_1518	1712223	1714154	+	1931	CDS		thiamine biosynthesis protein ThiC	0	0	0	chromosome 1	Cytoplasmic	H	map00730,map01100	ThiC-associated,ThiC_Rad_SAM
Bphy_1553	1759273	1761705	-	2432	CDS		pheT ,phenylalanyl-tRNA synthetase subunit beta	0	0	0	chromosome 1	Cytoplasmic	J	map00970	B3_4,B5,FDX-ACB,tRNA_bind
Bphy_1554	1761837	1762859	-	1022	CDS		pheS ,phenylalanyl-tRNA synthetase subunit alpha	0	0	0	chromosome 1		J	map00970	Phe_tRNA-synt_N,tRNA-synt_2d
Bphy_1555	1763009	1763368	-	359	CDS		rplT ,50S ribosomal protein L20	0	0	0	chromosome 1	Cytoplasmic	J	map03010	Ribosomal_L20
Bphy_1556	1763398	1763595	-	197	CDS		rpmI ,50S ribosomal protein L35	0	0	0	chromosome 1	Cytoplasmic	J	map03010	Ribosomal_L35p
Bphy_1557	1763852	1764322	-	470	CDS		translation initiation factor IF-3	0	0	0	chromosome 1	Cytoplasmic	J	-	IF3_C,IF3_N
Bphy_1558	1764427	1766334	-	1907	CDS		thrS ,threonyl-tRNA synthetase	0	0	0	chromosome 1	Cytoplasmic	J	map00970	HGTP_anticodon,TGS,tRNA-synt_2b,tRNA_SAD
Bphy_1567	1774515	1776188	+	1673	CDS		electron-transferring-flavoprotein dehydrogenase	0.00119474	2	9.457e-05	chromosome 1	Cytoplasmic	C	-	ETF_QO,FAD_binding_2,NAD_binding_8
Bphy_1569	1777762	1778862	-	1100	CDS		chorismate synthase	0.000908265	1	7.18939e-05	chromosome 1	Cytoplasmic	E	map00400,map01100,map01110,map01130,map01230	Chorismate_synt
Bphy_1590	1802445	1804817	-	2372	CDS		UvrD/REP helicase	0.00168563	4	0.000133426	chromosome 1	Cytoplasmic	L	map03420,map03430	UvrD-helicase,UvrD_C
Bphy_1591	1805086	1807959	+	2873	CDS		valS ,valyl-tRNA synthetase	0	0	0	chromosome 1	Cytoplasmic	J	map00970	Anticodon_1,Val_tRNA-synt_C,tRNA-synt_1
Bphy_1613	1831837	1834461	-	2624	CDS		alaS ,alanyl-tRNA synthetase	0	0	0	chromosome 1	Cytoplasmic	J	map00970	DHHA1,tRNA-synt_2c,tRNA_SAD
Bphy_1664	1878867	1879901	+	1034	CDS		dihydroorotate dehydrogenase 2	0.00193237	2	0.000152957	chromosome 1	Cytoplasmic Membrane	F	map00240,map01100	DHO_dh
Bphy_1693	1927395	1928090	-	695	CDS		ribose-5-phosphate isomerase A	0.00143678	1	0.000113729	chromosome 1	Cytoplasmic	G	map00030,map00710,map01100,map01110,map01120,map01130,map01200,map01230	Rib_5-P_isom_A,Sugar-bind
Bphy_1718	1955124	1956221	-	1097	CDS		AFG1 family ATPase	0.010929	12	0.000865083	chromosome 1	Cytoplasmic	S	-	AFG1_ATPase
Bphy_1719	1956318	1957748	-	1430	CDS		dihydrolipoamide dehydrogenase	0.000698812	1	5.53146e-05	chromosome 1	Cytoplasmic	C	map00010,map00020,map00260,map00280,map00620,map00630,map00640,map01100,map01110,map01120,map01130,map01200	Pyr_redox_2,Pyr_redox_dim
Bphy_1720	1957887	1959158	-	1271	CDS		dihydrolipoamide succinyltransferase	0	0	0	chromosome 1	Cytoplasmic	C	map00020,map00310,map01100,map01110,map01120,map01130,map01200	2-oxoacid_dh,Biotin_lipoyl,E3_binding
Bphy_1721	1959301	1962156	-	2855	CDS		sucA ,2-oxoglutarate dehydrogenase E1 component	0	0	0	chromosome 1	Cytoplasmic	C	map00020,map00310,map00380,map01100,map01110,map01120,map01130,map01200	2-oxogl_dehyd_N,E1_dh,OxoGdeHyase_C,Transket_pyr
Bphy_1722	1962532	1964358	-	1826	CDS		GTP-binding protein TypA	0.00328407	6	0.000259951	chromosome 1	Cytoplasmic Membrane	T	-	EFG_C,GTP_EFTU,GTP_EFTU_D2
Bphy_1728	1971081	1971512	-	431	CDS		rbfA ,ribosome-binding factor A	0.00231481	1	0.000183229	chromosome 1		J	-	RBFA
Bphy_1729	1971625	1974522	-	2897	CDS		infB ,translation initiation factor IF-2	0	0	0	chromosome 1	Cytoplasmic	J	-	GTP_EFTU,IF-2,IF2_N,IF2_assoc
Bphy_1730	1974619	1976094	-	1475	CDS		nusA ,transcription elongation factor NusA	0	0	0	chromosome 1	Cytoplasmic	K	-	HHH_5,KH_5,NusA_N,S1
Bphy_1731	1976091	1976549	-	458	CDS		hypothetical protein	0	0	0	chromosome 1	Cytoplasmic	J	-	DUF150,DUF150_C
Bphy_1732	1976972	1978765	-	1793	CDS		pseudouridine synthase	0	0	0	chromosome 1	Cytoplasmic	J	-	PseudoU_synth_2,S4
Bphy_1733	1978826	1979908	-	1082	CDS		segregation and condensation protein B	0.00554017	6	0.000438533	chromosome 1	Cytoplasmic	D	-	SMC_ScpB
Bphy_1747	1989853	1991871	-	2018	CDS		exodeoxyribonuclease V subunit alpha	0.0104012	21	0.000823307	chromosome 1	Unknown	L	map03440	AAA_30,UvrD_C_2,Viral_helicase1
Bphy_1748	1991868	1995593	-	3725	CDS		exodeoxyribonuclease V subunit beta	0.00107354	4	8.4976e-05	chromosome 1	Cytoplasmic	L	map03440	PDDEXK_1,UvrD-helicase,UvrD_C
Bphy_1749	1995590	1998955	-	3365	CDS		exodeoxyribonuclease V subunit gamma	0	0	0	chromosome 1	Cytoplasmic	L	map03440	Exonuc_V_gamma
Bphy_1783	2037654	2038994	-	1340	CDS		succinylarginine dihydrolase	0.0119314	16	0.000944431	chromosome 1	Unknown	E	map00330,map01100	AstB
Bphy_1786	2041500	2042552	-	1052	CDS		arginine/ornithine succinyltransferase subunit alpha	0.00759734	8	0.000601369	chromosome 1	Cytoplasmic	E	map00330,map01100	AstA
Bphy_1903	2154982	2155512	-	530	CDS		hypothetical protein	0.0094162	5	0.00074534	chromosome 1		S	-	DUF1064
Bphy_1904	2155509	2155688	-	179	CDS		hypothetical protein	0.0111111	2	0.000879501	chromosome 1	Unknown
Bphy_1911	2158679	2159674	+	995	CDS		putative phage repressor	0.00200803	2	0.000158946	chromosome 1		K	-	Peptidase_S24
Bphy_1941	2186303	2187826	+	1523	CDS		tartrate/fumarate subfamily Fe-S type hydro-lyase subunit alpha	0.00459318	7	0.000363573	chromosome 1	Cytoplasmic	C	map00020,map00620,map00720,map01100,map01110,map01120,map01130,map01200	Fumerase,Fumerase_C
Bphy_1943	2188575	2189486	+	911	CDS		glutamate racemase	0.00877193	8	0.000694343	chromosome 1	Cytoplasmic	M	map00471,map01100	Asp_Glu_race
Bphy_1944	2189724	2189960	+	236	CDS		BFD/(2Fe-2S)-binding domain-containing protein	0.00843882	2	0.000667976	chromosome 1	Unknown	P	-	Fer2_BFD
Bphy_1945	2190208	2190945	+	737	CDS		TonB family protein	0.00406504	3	0.000321769	chromosome 1	Unknown	M	-	TonB_C
Bphy_1946	2190984	2191715	+	731	CDS		MotA/TolQ/ExbB proton channel	0.00273224	2	0.000216271	chromosome 1	Cytoplasmic Membrane	U	-	MotA_ExbB
Bphy_1995	2245007	2245303	-	296	CDS		hypothetical protein	0.00673401	2	0.000533031	chromosome 1	Cytoplasmic Membrane	S	-	DUF2818
Bphy_1996	2245303	2246781	-	1478	CDS		NADH dehydrogenase subunit N	0	0	0	chromosome 1	Cytoplasmic Membrane	C	map00190,map01100	Proton_antipo_M
Bphy_1997	2246807	2248300	-	1493	CDS		NADH dehydrogenase subunit M	0.00133869	2	0.000105964	chromosome 1	Cytoplasmic Membrane	C	map00190,map01100	Oxidored_q5_N,Proton_antipo_M
Bphy_1998	2248323	2250392	-	2069	CDS		NADH dehydrogenase subunit L	0	0	0	chromosome 1	Cytoplasmic Membrane	C	map00190,map01100	Proton_antipo_C,Proton_antipo_M,Proton_antipo_N
Bphy_1999	2250411	2250716	-	305	CDS		NADH dehydrogenase subunit K	0	0	0	chromosome 1	Cytoplasmic Membrane	C	map00190,map01100	Oxidored_q2
Bphy_2000	2250736	2251404	-	668	CDS		NADH dehydrogenase subunit J	0	0	0	chromosome 1	Cytoplasmic Membrane	C	map00190,map01100	Oxidored_q3
Bphy_2001	2251564	2252052	-	488	CDS		NADH dehydrogenase subunit I	0	0	0	chromosome 1	Cytoplasmic	C	map00190,map01100	Fer4
Bphy_2002	2252067	2253131	-	1064	CDS		NADH dehydrogenase subunit H	0	0	0	chromosome 1	Cytoplasmic Membrane	C	map00190,map01100	NADHdh
Bphy_2003	2253132	2255465	-	2333	CDS		NADH dehydrogenase subunit G	0.000856898	2	6.78279e-05	chromosome 1	Cytoplasmic	C	map00190,map01100	Fer2_4,Molybdopterin,Molydop_binding,NADH-G_4Fe-4S_3
Bphy_2004	2255561	2256889	-	1328	CDS		NADH-quinone oxidoreductase subunit F	0	0	0	chromosome 1	Cytoplasmic	C	map00190,map01100	Complex1_51K,NADH_4Fe-4S,SLBB
Bphy_2005	2256886	2257371	-	485	CDS		NADH dehydrogenase subunit E	0	0	0	chromosome 1	Unknown (This protein may have multiple localization sites)	C	map00190,map01100	2Fe-2S_thioredx
Bphy_2006	2257542	2258795	-	1253	CDS		NADH dehydrogenase subunit D	0.000797448	1	6.31221e-05	chromosome 1	Cytoplasmic	C	map00190,map01100	Complex1_49kDa
Bphy_2007	2258805	2259407	-	602	CDS		NADH dehydrogenase subunit C	0	0	0	chromosome 1	Cytoplasmic	C	map00190,map01100	Complex1_30kDa
Bphy_2008	2259426	2259905	-	479	CDS		NADH dehydrogenase subunit B	0	0	0	chromosome 1	Cytoplasmic Membrane	C	map00190,map01100	Oxidored_q6
Bphy_2009	2259968	2260339	-	371	CDS		NADH dehydrogenase subunit A	0	0	0	chromosome 1		C	map00190,map01100	Oxidored_q4
Bphy_2010	2260698	2261090	-	392	CDS		secG ,preprotein translocase subunit SecG	0.0101781	4	0.00080565	chromosome 1	Cytoplasmic Membrane	U	map02024,map03060,map03070	SecG
Bphy_2011	2261177	2261956	-	779	CDS		tpiA ,triosephosphate isomerase	0	0	0	chromosome 1	Cytoplasmic	G	map00010,map00051,map00562,map00710,map01100,map01110,map01120,map01130,map01200,map01230	TIM
Bphy_2013	2263257	2265395	-	2138	CDS		polynucleotide phosphorylase/polyadenylase	0.000467508	1	3.70057e-05	chromosome 1	Cytoplasmic	J	map00230,map00240,map03018	KH_1,PNPase,RNase_PH,RNase_PH_C,S1
Bphy_2014	2265710	2265979	-	269	CDS		30S ribosomal protein S15	0.0111111	3	0.000879501	chromosome 1	Cytoplasmic	J	map03010	Ribosomal_S15
Bphy_2018	2270263	2271135	-	872	CDS		CDP-diacylglycerol--serine O-phosphatidyltransferase	0	0	0	chromosome 1	Cytoplasmic Membrane	I	map00260,map00564,map01100,map01110	CDP-OH_P_transf
Bphy_2019	2271156	2271794	-	638	CDS		phosphatidylserine decarboxylase	0.00625978	4	0.000495494	chromosome 1	Cytoplasmic Membrane	I	map00564,map01100,map01110	PS_Dcarbxylase
Bphy_2020	2271919	2272935	-	1016	CDS		ketol-acid reductoisomerase	0.000983284	1	7.7832e-05	chromosome 1	Cytoplasmic	H	map00290,map00770,map01100,map01110,map01130,map01210,map01230	IlvC,IlvN
Bphy_2021	2273035	2273526	-	491	CDS		ilvH ,acetolactate synthase 3 regulatory subunit	0	0	0	chromosome 1	Cytoplasmic	E	map00290,map00650,map00660,map00770,map01100,map01110,map01130,map01210,map01230	ACT_5,ALS_ss_C
Bphy_2022	2273638	2275395	-	1757	CDS		acetolactate synthase 3 catalytic subunit	0.00170648	3	0.000135077	chromosome 1		H	map00290,map00650,map00660,map00770,map01100,map01110,map01130,map01210,map01230	TPP_enzyme_C,TPP_enzyme_M,TPP_enzyme_N
Bphy_2025	2276818	2277576	+	758	CDS		putative transmembrane protein	0.0105402	8	0.00083431	chromosome 1	Unknown	S	-	DUF3106
Bphy_2064	2315752	2316480	+	728	CDS		hypothetical protein	0.00823045	6	0.000651483	chromosome 1	Cytoplasmic	K	-	Transcrip_reg
Bphy_2065	2316767	2318044	+	1277	CDS		phosphoribosylamine--glycine ligase	0	0	0	chromosome 1	Cytoplasmic	F	map00230,map01100,map01110,map01130	GARS_A,GARS_C,GARS_N
Bphy_2066	2318306	2319238	+	932	CDS		coproporphyrinogen III oxidase	0.00857449	8	0.000678715	chromosome 1	Cytoplasmic	H	map00860,map01100,map01110	Coprogen_oxidas
Bphy_2067	2319245	2320006	+	761	CDS		nicotinic acid mononucleotide adenylyltransferase	0.00787402	6	0.000623269	chromosome 1		H	map00760,map01100	CTP_transf_like
Bphy_2071	2321802	2323271	+	1469	CDS		ribonuclease	0.00748299	11	0.000592317	chromosome 1	Cytoplasmic	J	-	RNase_E_G,S1
Bphy_2075	2324306	2325604	-	1298	CDS		O-antigen polymerase	0.00307929	4	0.000243742	chromosome 1	Cytoplasmic Membrane	M	-	Wzy_C
Bphy_2077	2326942	2328735	-	1793	CDS		lipid A ABC exporter ATPase/inner membrane subunits MsbA	0.00167224	3	0.000132366	chromosome 1	Cytoplasmic Membrane	V	map02010	ABC_membrane,ABC_tran
Bphy_2079	2329883	2333446	-	3563	CDS		dnaE ,DNA polymerase III subunit alpha	0.00112233	4	8.88385e-05	chromosome 1	Cytoplasmic	L	map00230,map00240,map01100,map03030,map03430,map03440	DNA_pol3_alpha,HHH_6,PHP,tRNA_anti-codon
Bphy_2123	2383556	2385877	-	2321	CDS		DNA topoisomerase IV subunit A	0.000861326	2	6.81784e-05	chromosome 1	Cytoplasmic	L	-	DNA_gyraseA_C,DNA_topoisoIV
Bphy_2124	2385932	2387917	-	1985	CDS		DNA topoisomerase IV subunit B	0.00302115	6	0.000239139	chromosome 1	Cytoplasmic	L	-	DNA_gyraseB,DNA_gyraseB_C,HATPase_c,Toprim
Bphy_2169	2430833	2432890	-	2057	CDS		nadE ,NAD synthetase	0.00388727	8	0.000307697	chromosome 1	Cytoplasmic	H	map00760,map01100	CN_hydrolase,NAD_synthase
Bphy_2173	2435389	2435916	-	527	CDS		inorganic pyrophosphatase	0.00757576	4	0.00059966	chromosome 1	Cytoplasmic	C	,map00190	Pyrophosphatase
Bphy_2179	2443380	2444363	-	983	CDS		hemC ,porphobilinogen deaminase	0.00101626	1	8.04422e-05	chromosome 1	Cytoplasmic	H	map00860,map01100,map01110,map01120	Porphobil_deam,Porphobil_deamC
Bphy_2182	2448905	2449717	+	812	CDS		XRE family transcriptional regulator	0.00369004	3	0.000292085	chromosome 1	Unknown	K	-	HTH_31
Bphy_2183	2449844	2451250	+	1406	CDS		argininosuccinate lyase	0.000710732	1	5.62581e-05	chromosome 1	Cytoplasmic	E	map00220,map00250,map01100,map01110,map01130,map01230	ASL_C2,Lyase_1
Bphy_2186	2453172	2455454	-	2282	CDS		lysine decarboxylase	0.00175208	4	0.000138686	chromosome 1	Cytoplasmic	E	map00330,map01100	OKR_DC_1,OKR_DC_1_C,OKR_DC_1_N
Bphy_2187	2455539	2456108	-	569	CDS	dcd	deoxycytidine triphosphate deaminase	0	0	0	chromosome 1	Cytoplasmic	F	map00240,map01100	dUTPase
Bphy_2189	2457140	2458228	-	1088	CDS		cobyrinic acid a,c-diamide synthase	0.00367309	4	0.000290744	chromosome 1	Cytoplasmic Membrane	D	-	FeS_assembly_P,ParA
Bphy_2191	2459745	2461925	+	2180	CDS		metG ,methionyl-tRNA synthetase	0.000458505	1	3.6293e-05	chromosome 1	Cytoplasmic	J	map00450,map00970	Anticodon_1,tRNA-synt_1g,tRNA_bind
Bphy_2196	2471005	2471877	+	872	CDS	scpA	chromosome segregation and condensation protein ScpA	0	0	0	chromosome 1	Cytoplasmic	D	-	SMC_ScpA
Bphy_2197	2472125	2472958	+	833	CDS		panC ,pantoate--beta-alanine ligase	0.00359712	3	0.000284731	chromosome 1	Cytoplasmic	H	map00410,map00770,map01100,map01110	Pantoate_ligase
Bphy_2198	2472977	2473363	+	386	CDS		aspartate alpha-decarboxylase	0.00258398	1	0.000204535	chromosome 1	Unknown	H	map00410,map00770,map01100,map01110	Asp_decarbox
Bphy_2215	2489446	2489760	+	314	CDS		hypothetical protein	0.0031746	1	0.000251286	chromosome 1	Unknown	D	-	ZapA
Bphy_2219	2491633	2492538	-	905	CDS		prolipoprotein diacylglyceryl transferase	0.00662252	6	0.000524206	chromosome 1	Cytoplasmic Membrane	M	-	LGT
Bphy_2226	2498894	2500006	+	1112	CDS		permease YjgP/YjgQ family protein	0.00359389	4	0.000284475	chromosome 1	Cytoplasmic Membrane	S	map02010	YjgP_YjgQ
Bphy_2227	2500010	2501158	+	1148	CDS		permease YjgP/YjgQ family protein	0	0	0	chromosome 1	Cytoplasmic Membrane	S	map02010	YjgP_YjgQ
Bphy_2230	2502694	2503461	-	767	CDS		uroporphyrin-III C-methyltransferase	0.00911458	7	0.000721466	chromosome 1	Cytoplasmic	H	map00860,map01100,map01110,map01120	TP_methylase
Bphy_2231	2503497	2504825	-	1328	CDS		sulfate adenylyltransferase large subunit	0	0	0	chromosome 1	Cytoplasmic	H	map00230,map00261,map00450,map00920,map01100,map01120,map01130	GTP_EFTU,GTP_EFTU_D2
Bphy_2232	2504851	2505813	-	962	CDS		sulfate adenylyltransferase subunit 2	0	0	0	chromosome 1	Cytoplasmic	H	map00230,map00261,map00450,map00920,map01100,map01120,map01130	PAPS_reduct
Bphy_2233	2505919	2506659	-	740	CDS		phosphoadenosine phosphosulfate reductase	0	0	0	chromosome 1	Cytoplasmic	C	map00920,map01100,map01120	PAPS_reduct
Bphy_2234	2506656	2507201	-	545	CDS		hypothetical protein	0	0	0	chromosome 1	Cytoplasmic	S	-	DUF934
Bphy_2235	2507220	2508899	-	1679	CDS		sulfite reductase	0	0	0	chromosome 1	Cytoplasmic	C	map00920,map01100,map01120	NIR_SIR,NIR_SIR_ferr
Bphy_2236	2509137	2510078	+	941	CDS		transcriptional regulator CysB-like protein	0	0	0	chromosome 1	Cytoplasmic	K	-	HTH_1,LysR_substrate
Bphy_2264	2536613	2537920	-	1307	CDS		3-deoxy-D-manno-octulosonic-acid transferase	0.00229358	3	0.000181548	chromosome 1	Cytoplasmic	M	map00540,map01100	Glycos_transf_1,Glycos_transf_N
Bphy_2265	2538024	2538908	-	884	CDS		hypothetical protein	0.00903955	8	0.000715527	chromosome 1	Unknown	S	-	Kdo_hydroxy
Bphy_2267	2540508	2541902	-	1394	CDS		phosphomannomutase	0.00143369	2	0.000113484	chromosome 1	Cytoplasmic	G	map00010,map00030,map00051,map00052,map00230,map00500,map00520,map00521,map01100,map01110,map01120,map01130	PGM_PMM_I,PGM_PMM_II,PGM_PMM_III,PGM_PMM_IV
Bphy_2268	2542149	2543411	+	1262	CDS		polysaccharide biosynthesis protein	0.00475059	6	0.000376034	chromosome 1	Cytoplasmic Membrane	S	-	Polysacc_synt,Polysacc_synt_3
Bphy_2297	2578005	2578937	+	932	CDS		NAD-dependent epimerase/dehydratase	0.00321543	3	0.000254518	chromosome 1	Cytoplasmic	M	map00052,map00520,map01100	Epimerase
Bphy_2313	2597585	2598937	-	1352	CDS		ABC transporter-like protein	0.00443459	6	0.000351021	chromosome 1	Cytoplasmic Membrane	GM	map02010	ABC_tran,Wzt_C
Bphy_2316	2600834	2601727	-	893	CDS		dTDP-4-dehydrorhamnose reductase	0.00559284	5	0.000442702	chromosome 1	Unknown	M	map00521,map00523,map01130	RmlD_sub_bind
Bphy_2317	2601735	2602286	-	551	CDS		dTDP-4-dehydrorhamnose 3,5-epimerase	0.00543478	3	0.000430191	chromosome 1	Cytoplasmic	M	map00521,map00523,map01130	dTDP_sugar_isom
Bphy_2319	2603175	2604236	-	1061	CDS		dTDP-glucose 4,6-dehydratase	0.00376648	4	0.000298136	chromosome 1	Cytoplasmic	M	map00521,map00523,map00525,map01055,map01130	GDP_Man_Dehyd
Bphy_2333	2615893	2617533	-	1640	CDS		groEL ,chaperonin GroEL	0	0	0	chromosome 1	Cytoplasmic	O	map03018,map04212,map04940,map05134,map05152	Cpn60_TCP1
Bphy_2334	2617578	2617868	-	290	CDS		groES ,co-chaperonin GroES	0.00687285	2	0.000544022	chromosome 1	Cytoplasmic	O	-	Cpn10
Bphy_2449	2748292	2749539	-	1247	CDS		glyA ,serine hydroxymethyltransferase	0.00641026	8	0.000507405	chromosome 1	Cytoplasmic	E	map00260,map00460,map00630,map00670,map00680,map01100,map01110,map01120,map01130,map01200,map01230,map01523	SHMT
Bphy_2453	2752244	2752690	+	446	CDS		protein TolR	0.00447427	2	0.000354162	chromosome 1	Cytoplasmic Membrane	U	-	ExbD
Bphy_2454	2752687	2753742	+	1055	CDS		protein TolA	0	0	0	chromosome 1	Unknown	M	-	TonB_2
Bphy_2455	2753859	2755151	+	1292	CDS		tolB ,translocation protein TolB	0.00232019	3	0.000183655	chromosome 1	Periplasmic	U	-	PD40,TolB_N
Bphy_2456	2755171	2755680	+	509	CDS		peptidoglycan-associated lipoprotein	0.00196078	1	0.000155206	chromosome 1	Outer Membrane	M	-	OmpA
Bphy_2486	2796051	2797004	+	953	CDS		miaA ,tRNA delta(2)-isopentenylpyrophosphate transferase	0.00838574	8	0.000663775	chromosome 1	Unknown (This protein may have multiple localization sites)	J	map00908,map01100,map01110	IPPT
Bphy_2487	2797651	2798718	-	1067	CDS		phosphoribosylaminoimidazole synthetase	0	0	0	chromosome 1	Cytoplasmic	F	map00230,map01100,map01110,map01130	AIRS,AIRS_C
Bphy_2489	2799947	2800720	+	773	CDS	hdA	DnaA regulatory inactivator Hda	0.00775194	6	0.000613606	chromosome 1	Unknown	L	-	Bac_DnaA
Bphy_2496	2807195	2808328	-	1133	CDS		chaperone protein DnaJ	0	0	0	chromosome 1	Cytoplasmic	O	-	DnaJ,DnaJ_C,DnaJ_CXXCXGXG
Bphy_2497	2808584	2810545	-	1961	CDS	dnaK	molecular chaperone DnaK	0	0	0	chromosome 1	Cytoplasmic	O	map03018,map04212,map05152	HSP70
Bphy_2499	2811148	2811756	-	608	CDS		heat shock protein GrpE	0.00821018	5	0.000649878	chromosome 1	Cytoplasmic	O	-	GrpE
Bphy_2502	2812729	2813799	-	1070	CDS		hemH ,ferrochelatase	0.00466853	5	0.000369538	chromosome 1	Cytoplasmic	H	map00860,map01100,map01110	Ferrochelatase
Bphy_2510	2828166	2829239	+	1073	CDS		phospho-2-dehydro-3-deoxyheptonate aldolase	0.000931099	1	7.37012e-05	chromosome 1	Cytoplasmic	E	map00400,map01100,map01110,map01130,map01230,map02024	DAHP_synth_1
Bphy_2518	2836565	2837380	+	815	CDS		pyrroline-5-carboxylate reductase	0.00245098	2	0.000194008	chromosome 1	Cytoplasmic	E	map00330,map01100,map01110,map01130,map01230	F420_oxidored,P5CR_dimer
Bphy_2519	2837477	2838340	-	863	CDS		4-hydroxybenzoate polyprenyl transferase	0.00231481	2	0.000183229	chromosome 1	Cytoplasmic Membrane	H	map00130,map01100,map01110	UbiA
Bphy_2523	2842355	2844577	-	2222	CDS		ATP-dependent DNA helicase RecG	0.0031489	7	0.000249251	chromosome 1	Cytoplasmic	L	map03440	DEAD,Helicase_C,RecG_wedge
Bphy_2526	2847340	2847669	+	329	CDS		yajC ,preprotein translocase subunit YajC	0.0030303	1	0.000239864	chromosome 1	Cytoplasmic Membrane	U	map02024,map03060,map03070	YajC
Bphy_2527	2847790	2849835	+	2045	CDS		secD ,preprotein translocase subunit SecD	0	0	0	chromosome 1	Cytoplasmic Membrane	U	map03060,map03070	SecD-TM1,SecD_SecF,Sec_GG
Bphy_2528	2849853	2850803	+	950	CDS		secF ,preprotein translocase subunit SecF	0.00315457	3	0.000249701	chromosome 1	Cytoplasmic Membrane	U	map03060,map03070	SecD_SecF,Sec_GG
Bphy_2545	2865583	2866737	+	1154	CDS		mnmA ,tRNA-specific 2-thiouridylase MnmA	0.0025974	3	0.000205598	chromosome 1	Cytoplasmic	J	map04122	tRNA_Me_trans
Bphy_2550	2872119	2873339	+	1220	CDS		UbiH/UbiF/VisC/COQ6 family ubiquinone biosynthesis hydroxylase	0.00737101	9	0.000583453	chromosome 1	Unknown	CH	map00130,map01100,map01110	FAD_binding_3
Bphy_2553	2874883	2876448	+	1565	CDS		purH ,bifunctional phosphoribosylaminoimidazolecarboxamide formyltransferase/IMP cyclohydrolase	0.00127714	2	0.000101092	chromosome 1	Cytoplasmic	F	map00230,map00670,map01100,map01110,map01130,map01523	AICARFT_IMPCHas,MGS
Bphy_2554	2876555	2877097	+	542	CDS		ruvC ,Holliday junction resolvase	0.0092081	5	0.000728869	chromosome 1	Cytoplasmic	L	map03440	RuvC
Bphy_2557	2878566	2879657	+	1091	CDS		ruvB ,Holliday junction DNA helicase RuvB	0.0018315	2	0.000144973	chromosome 1		L	map03440	RuvB_C,RuvB_N
Bphy_2560	2880909	2882207	-	1298	CDS		tyrosyl-tRNA synthetase	0.00384911	5	0.000304677	chromosome 1		J	map00970	S4,S4_2,tRNA-synt_1b
Bphy_2563	2884228	2884620	-	392	CDS		rpsI ,30S ribosomal protein S9	0.00254453	1	0.000201413	chromosome 1	Cytoplasmic	J	map03010	Ribosomal_S9
Bphy_2564	2884632	2885117	-	485	CDS		rplM ,50S ribosomal protein L13	0.0102881	5	0.000814353	chromosome 1		J	map03010	Ribosomal_L13
Bphy_2567	2887463	2888527	-	1064	CDS		dihydroorotase	0	0	0	chromosome 1	Cytoplasmic	F	map00240,map01100	Amidohydro_1
Bphy_2576	2896525	2897913	+	1388	CDS		adenylosuccinate lyase	0.00215983	3	0.000170961	chromosome 1	Cytoplasmic	F	map00230,map00250,map01100,map01110,map01130	ASL_C,Lyase_1
Bphy_2584	2921186	2921608	-	422	CDS		hypothetical protein	0.00236407	1	0.000187128	chromosome 1		S	-	UPF0093
Bphy_2586	2923129	2924256	-	1127	CDS		holA ,DNA polymerase III subunit delta	0.00443262	5	0.000350865	chromosome 1	Unknown	L	map00230,map00240,map01100,map03030,map03430,map03440	DNA_pol3_delt_C,DNA_pol3_delta
Bphy_2587	2924299	2924850	-	551	CDS		rare lipoprotein B	0.00543478	3	0.000430191	chromosome 1	Cytoplasmic Membrane	M	-	LptE
Bphy_2588	2924891	2927485	-	2594	CDS		leuS ,leucyl-tRNA synthetase	0.000770713	2	6.10059e-05	chromosome 1	Cytoplasmic	J	map00970	Anticodon_1,tRNA-synt_1,tRNA-synt_1_2
Bphy_2591	2929081	2929878	-	797	CDS		dihydrodipicolinate reductase	0.0037594	3	0.000297576	chromosome 1	Cytoplasmic	E	map00261,map00300,map01100,map01110,map01120,map01130,map01230	DapB_C,DapB_N
Bphy_2593	2931049	2931477	+	428	CDS		ferric uptake regulator family protein	0.002331	1	0.000184511	chromosome 1	Cytoplasmic	K	-	FUR
Bphy_2598	2935704	2936714	-	1010	CDS		glyceraldehyde-3-phosphate dehydrogenase, type I	0	0	0	chromosome 1	Cytoplasmic	C	map00010,map00710,map01100,map01110,map01120,map01130,map01200,map01230,map04066,map05010	Gp_dh_C,Gp_dh_N
Bphy_2599	2936824	2938842	-	2018	CDS		transketolase	0.00247647	5	0.000196026	chromosome 1	Unknown	G	map00030,map00710,map01051,map01100,map01110,map01120,map01130,map01200,map01230	Transket_pyr,Transketolase_C,Transketolase_N
Bphy_2604	2942108	2944402	-	2294	CDS		malic enzyme	0	0	0	chromosome 1	Cytoplasmic	C	map00620,map00710,map01100,map01120,map01200	Malate_DH,Malic_M,PTA_PTB,malic
Bphy_2605	2944654	2945649	+	995	CDS		thiamine monophosphate kinase	0.00702811	7	0.000556311	chromosome 1	Unknown	H	map00730,map01100	AIRS,AIRS_C
Bphy_2606	2945639	2946280	+	641	CDS		phosphatidylglycerophosphatase A	0.0046729	3	0.000369884	chromosome 1		I	map00564,map01100	PgpA
Bphy_2609	2947417	2948232	-	815	CDS		pyrF ,orotidine 5'-phosphate decarboxylase	0.00612745	5	0.000485019	chromosome 1	Cytoplasmic	F	map00240,map01100	OMPdecase
Bphy_2622	2960705	2961577	-	872	CDS	aroE	shikimate 5-dehydrogenase	0.0045819	4	0.000362681	chromosome 1	Unknown	E	map00400,map01100,map01110,map01130,map01230	Shikimate_DH,Shikimate_dh_N
Bphy_2623	2961574	2963679	-	2105	CDS		ribonuclease II	0.00617284	13	0.000488612	chromosome 1	Cytoplasmic	K	-	RNB
Bphy_2628	2967452	2967916	+	464	CDS		3-dehydroquinate dehydratase	0	0	0	chromosome 1	Unknown	E	map00400,map01100,map01110,map01130,map01230	DHquinase_II
Bphy_2629	2967985	2968455	+	470	CDS		acetyl-CoA carboxylase biotin carboxyl carrier protein subunit	0	0	0	chromosome 1	Cytoplasmic	I	map00061,map00620,map00640,map00720,map01100,map01110,map01120,map01130,map01200,map01212	Biotin_lipoyl
Bphy_2630	2968568	2969953	+	1385	CDS		acetyl-CoA carboxylase biotin carboxylase subunit	0	0	0	chromosome 1		I	map00061,map00620,map00640,map00720,map01100,map01110,map01120,map01130,map01200,map01212	Biotin_carb_C,Biotin_carb_N,CPSase_L_D2
Bphy_2634	2973360	2974304	+	944	CDS		ribokinase-like domain-containing protein	0.0116402	11	0.000921382	chromosome 1	Cytoplasmic	G	map00030,map00230,map01100	PfkB
Bphy_2638	2976180	2977403	-	1223	CDS		ribonucleotide-diphosphate reductase subunit beta	0.000816993	1	6.46692e-05	chromosome 1	Cytoplasmic	F	map00230,map00240,map01100	Ribonuc_red_sm
Bphy_2639	2978015	2981008	-	2993	CDS		ribonucleotide-diphosphate reductase subunit alpha	0	0	0	chromosome 1	Cytoplasmic	F	map00230,map00240,map01100	ATP-cone,Ribonuc_red_lgC,Ribonuc_red_lgN
Bphy_2643	2983475	2984842	+	1367	CDS		signal recognition particle protein	0.00292398	4	0.000231448	chromosome 1	Cytoplasmic Membrane	U	map02024,map03060,map03070	SRP54,SRP54_N,SRP_SPB
Bphy_2646	2986249	2987985	-	1736	CDS		prolyl-tRNA synthetase	0.00115141	2	9.114e-05	chromosome 1	Cytoplasmic	J	map00970	HGTP_anticodon,tRNA-synt_2b,tRNA_edit
Bphy_2649	2989705	2990823	-	1118	CDS		gamma-glutamyl kinase	0.000893655	1	7.07374e-05	chromosome 1	Cytoplasmic	F	map00330,map00332,map01100,map01130,map01230	AA_kinase,PUA
Bphy_2651	2992202	2992462	-	260	CDS		rpmA ,50S ribosomal protein L27	0.00383142	1	0.000303276	chromosome 1	Cytoplasmic	J	map03010	Ribosomal_L27
Bphy_2653	2993037	2994029	+	992	CDS		polyprenyl synthetase	0.00302115	3	0.000239139	chromosome 1	Cytoplasmic	H	map00900,map01110	polyprenyl_synt
Bphy_2664	3003770	3006580	-	2810	CDS		preprotein translocase subunit SecA	0	0	0	chromosome 1	Cytoplasmic	U	map02024,map03060,map03070	SEC-C,SecA_DEAD,SecA_PP_bind,SecA_SW
Bphy_2666	3007490	3008407	-	917	CDS		lpxC ,UDP-3-O-[3-hydroxymyristoyl] N-acetylglucosamine deacetylase	0.0043573	4	0.000344903	chromosome 1	Cytoplasmic	M	map00540,map01100	LpxC
Bphy_2668	3009423	3010616	-	1193	CDS	ftsZ	cell division protein FtsZ	0	0	0	chromosome 1	Cytoplasmic	D	map04112	FtsZ_C,Tubulin
Bphy_2669	3010738	3011970	-	1232	CDS	ftsA	cell division protein FtsA	0.00081103	1	6.41972e-05	chromosome 1	Cytoplasmic	D	map04112	FtsA,SHS2_FTSA
Bphy_2670	3011998	3012750	-	752	CDS		polypeptide-transport-associated domain-containing protein	0.00398406	3	0.000315359	chromosome 1	Unknown	D	map04112	FtsQ,POTRA_1
Bphy_2671	3012766	3013707	-	941	CDS	ddI	D-alanine--D-alanine ligase	0.00212314	2	0.000168058	chromosome 1	Cytoplasmic	F	map00473,map00550,map01100,map01502	Dala_Dala_lig_C,Dala_Dala_lig_N
Bphy_2672	3013704	3015098	-	1394	CDS		murC ,UDP-N-acetylmuramate--L-alanine ligase	0	0	0	chromosome 1	Cytoplasmic	M	map00471,map00550,map01100	Mur_ligase,Mur_ligase_C,Mur_ligase_M
Bphy_2673	3015095	3016216	-	1121	CDS		murG ,undecaprenyldiphospho-muramoylpentapeptide beta-N- acetylglucosaminyltransferase	0	0	0	chromosome 1	Cytoplasmic Membrane	M	map00550,map01100,map01502,map04112	Glyco_tran_28_C,Glyco_transf_28
Bphy_2674	3016213	3017496	-	1283	CDS	ftsW	cell division protein FtsW	0.000778816	1	6.16473e-05	chromosome 1	Cytoplasmic Membrane	D	map04112	FTSW_RODA_SPOVE
Bphy_2675	3017493	3019007	-	1514	CDS		murD ,UDP-N-acetylmuramoyl-L-alanyl-D-glutamate synthetase	0	0	0	chromosome 1	Cytoplasmic	M	map00471,map00550,map01100	Mur_ligase_C,Mur_ligase_M
Bphy_2676	3019068	3020237	-	1169	CDS		mraY ,phospho-N-acetylmuramoyl-pentapeptide- transferase	0	0	0	chromosome 1	Cytoplasmic Membrane	M	map00550,map01100,map01502	Glycos_transf_4,MraY_sig1
Bphy_2677	3020255	3021667	-	1412	CDS		UDP-N-acetylmuramoylalanyl-D-glutamyl-2, 6-diaminopimelate--D-alanyl-D-alanyl ligase	0	0	0	chromosome 1	Cytoplasmic	M	map00300,map00550,map01100,map01502	Mur_ligase,Mur_ligase_C,Mur_ligase_M
Bphy_2678	3021664	3023202	-	1538	CDS		murE ,UDP-N-acetylmuramoylalanyl-D-glutamate--2, 6-diaminopimelate ligase	0.00324886	5	0.000257164	chromosome 1	Cytoplasmic	M	map00300,map00550	Mur_ligase,Mur_ligase_C,Mur_ligase_M
Bphy_2679	3023199	3025073	-	1874	CDS		peptidoglycan glycosyltransferase	0.00853333	16	0.000675457	chromosome 1	Cytoplasmic Membrane	M	map00550,map01501	PBP_dimer,Transpeptidase
Bphy_2680	3025070	3025420	-	350	CDS	ftsL	cell division protein FtsL	0	0	0	chromosome 1	Unknown	D	-	FtsL
Bphy_2681	3025417	3026370	-	953	CDS		mraW ,S-adenosyl-methyltransferase MraW	0	0	0	chromosome 1	Cytoplasmic	J	-	Methyltransf_5
Bphy_2682	3026386	3026715	-	329	CDS		hypothetical protein	0	0	0	chromosome 1		K	-	MraZ
Bphy_2683	3027215	3027778	-	563	CDS		hypothetical protein	0.0035461	2	0.000280692	chromosome 1		H	map00130,map01100,map01110	COQ7
Bphy_2698	3051384	3052877	+	1493	CDS		anthranilate synthase component I	0.00468541	7	0.000370874	chromosome 1	Cytoplasmic	E	map00400,map00405,map01100,map01110,map01130,map01230,map02024,map02025	Anth_synt_I_N,Chorismate_bind
Bphy_2699	3052890	3053477	+	587	CDS		anthranilate synthase component II	0.0102041	6	0.000807705	chromosome 1	Cytoplasmic	EH	map00400,map00405,map01100,map01110,map01130,map01230,map02024,map02025	GATase
Bphy_2700	3053498	3054526	+	1028	CDS		trpD ,anthranilate phosphoribosyltransferase	0.00291545	3	0.000230773	chromosome 1	Cytoplasmic	F	map00400,map01100,map01110,map01130,map01230	Glycos_trans_3N,Glycos_transf_3
Bphy_2701	3054545	3055330	+	785	CDS		trpC ,indole-3-glycerol-phosphate synthase	0.00254453	2	0.000201413	chromosome 1	Cytoplasmic	E	map00400,map01100,map01110,map01130,map01230	IGPS
Bphy_2703	3056086	3056898	+	812	CDS		uracil-DNA glycosylase	0.0110701	9	0.000876256	chromosome 1	Cytoplasmic	L	map03410,map05340	UDG
Bphy_2707	3060650	3061822	-	1172	CDS		ubiquinone biosynthesis hydroxylase family protein	0.00426257	5	0.000337405	chromosome 1	Unknown	CH	-	FAD_binding_3,SE
Bphy_2720	3075470	3076759	+	1289	CDS		hemA ,glutamyl-tRNA reductase	0.00697674	9	0.000552245	chromosome 1	Cytoplasmic	H	map00860,map01100,map01110,map01120	GlutR_N,GlutR_dimer,Shikimate_DH
Bphy_2721	3076892	3077974	+	1082	CDS		prfA ,peptide chain release factor 1	0.00646353	7	0.000511621	chromosome 1	Cytoplasmic	J	-	PCRF,RF-1
Bphy_2740	3095313	3095924	-	611	CDS		glutathione S-transferase domain-containing protein	0.00490196	3	0.000388015	chromosome 1	Cytoplasmic	O	-	GST_C,GST_C_2,GST_N,GST_N_3
Bphy_2746	3101123	3101902	-	779	CDS		Sec-independent protein translocase subunit TatC	0.00512821	4	0.000405924	chromosome 1	Cytoplasmic Membrane	U	map03060,map03070	TatC
Bphy_2747	3101945	3102493	-	548	CDS		tatB ,sec-independent translocase	0.00182149	1	0.000144181	chromosome 1	Unknown	U	map03060,map03070	MttA_Hcf106
Bphy_2748	3102549	3102785	-	236	CDS		tatA ,twin arginine translocase protein A	0.00421941	1	0.000333988	chromosome 1	Cytoplasmic Membrane	U	map03060,map03070	MttA_Hcf106
Bphy_2753	3104831	3105604	-	773	CDS		imidazole glycerol phosphate synthase subunit HisF	0.00258398	2	0.000204535	chromosome 1	Cytoplasmic	E	map00340,map01100,map01110,map01230	His_biosynth
Bphy_2754	3105761	3106513	-	752	CDS		1-(5-phosphoribosyl)-5-[(5- phosphoribosylamino)methylideneamino] imidazole-4-carboxamide isomerase	0.00398406	3	0.000315359	chromosome 1	Cytoplasmic	E	map00340,map01100,map01110,map01230	His_biosynth
Bphy_2755	3106723	3107364	-	641	CDS		hisH ,imidazole glycerol phosphate synthase subunit HisH	0.0046729	3	0.000369884	chromosome 1	Cytoplasmic	E	map00340,map01100,map01110,map01230	GATase
Bphy_2757	3108042	3108629	-	587	CDS		hisB ,imidazoleglycerol-phosphate dehydratase	0.00340136	2	0.000269235	chromosome 1	Cytoplasmic	E	map00340,map01100,map01110,map01230	IGPD
Bphy_2759	3109909	3111231	-	1322	CDS		hisD ,histidinol dehydrogenase	0.00226757	3	0.00017949	chromosome 1	Cytoplasmic	E	map00340,map01100,map01110,map01230	Histidinol_dh
Bphy_2760	3111287	3111985	-	698	CDS		hisG ,ATP phosphoribosyltransferase catalytic subunit	0.00286123	2	0.000226481	chromosome 1	Cytoplasmic	F	map00340,map01100,map01110,map01230	HisG
Bphy_2761	3111982	3113244	-	1262	CDS		UDP-N-acetylglucosamine 1-carboxyvinyltransferase	0.000791766	1	6.26723e-05	chromosome 1	Cytoplasmic	M	map00520,map00550,map01100	EPSP_synthase
Bphy_2771	3120029	3121156	-	1127	CDS		thiamine-phosphate diphosphorylase	0	0	0	chromosome 1		H	map00730,map01100	TMP-TENI
Bphy_2772	3121153	3121977	-	824	CDS		thiG ,thiazole synthase	0.00606061	5	0.000479728	chromosome 1	Cytoplasmic	H	map00730,map01100	ThiG
Bphy_2774	3122228	3123388	-	1160	CDS		FAD dependent oxidoreductase	0.00689061	8	0.000545427	chromosome 1	Unknown	E	map00730,map01100	DAO
Bphy_2787	3134984	3136501	-	1517	CDS		gltD ,glutamate synthase subunit beta	0	0	0	chromosome 1		C	map00250,map00910,map01100,map01110,map01120,map01130,map01230	Fer4_20,Pyr_redox_2
Bphy_2788	3136565	3141268	-	4703	CDS		glutamate synthase	0	0	0	chromosome 1	Cytoplasmic	E	map00250,map00630,map00910,map01100,map01110,map01120,map01130,map01230	GATase_2,GXGXG,Glu_syn_central,Glu_synthase
Bphy_2793	3145370	3146461	-	1091	CDS	aroB	3-dehydroquinate synthase	0.000915751	1	7.24864e-05	chromosome 1		E	map00400,map01100,map01110,map01130,map01230	DHQ_synthase,SKI
Bphy_2794	3146469	3147020	-	551	CDS	aroK	shikimate kinase	0.00362319	2	0.000286794	chromosome 1	Cytoplasmic	F	map00400,map01100,map01110,map01130,map01230	SKI
Bphy_2801	3154321	3154629	+	308	CDS		putative lipoprotein	0.00970874	3	0.000768496	chromosome 1	Unknown	-	-	LPAM_2
Bphy_2802	3154639	3155901	+	1262	CDS		diaminopimelate decarboxylase	0.0023753	3	0.000188017	chromosome 1	Cytoplasmic	E	map00300,map01100,map01110,map01120,map01130,map01230	Orn_Arg_deC_N,Orn_DAP_Arg_deC
Bphy_2806	3159113	3161338	-	2225	CDS		ResB family protein	0.00134771	3	0.000106678	chromosome 1	Cytoplasmic Membrane	O	-	ResB
Bphy_2808	3162386	3163048	+	662	CDS		engB ,ribosome biogenesis GTP-binding protein YsxC	0.00603318	4	0.000477557	chromosome 1	Unknown	D	-	MMR_HSR1
Bphy_2810	3164436	3166292	-	1856	CDS		protein-disulfide reductase	0	0	0	chromosome 1	Cytoplasmic Membrane	CO	-	DsbC,DsbD,Thioredoxin_2,Thioredoxin_7
Bphy_2813	3167312	3168289	-	977	CDS		DNA-directed RNA polymerase subunit alpha	0	0	0	chromosome 1	Cytoplasmic	K	map00230,map00240,map01100,map03020	RNA_pol_A_CTD,RNA_pol_A_bac,RNA_pol_L
Bphy_2814	3168414	3169037	-	623	CDS		rpsD ,30S ribosomal protein S4	0	0	0	chromosome 1	Cytoplasmic	J	map03010	Ribosomal_S4,S4
Bphy_2815	3169184	3169588	-	404	CDS		30S ribosomal protein S11	0	0	0	chromosome 1	Cytoplasmic	J	map03010	Ribosomal_S11
Bphy_2816	3169617	3169982	-	365	CDS		rpsM ,30S ribosomal protein S13	0	0	0	chromosome 1	Cytoplasmic	J	map03010	Ribosomal_S13
Bphy_2817	3170024	3170140	-	116	CDS		rpmJ ,50S ribosomal protein L36	0	0	0	chromosome 1	Cytoplasmic	J	map03010	Ribosomal_L36
Bphy_2818	3170161	3170379	-	218	CDS		infA ,translation initiation factor IF-1	0	0	0	chromosome 1	Cytoplasmic	J	-	eIF-1a
Bphy_2819	3170388	3171734	-	1346	CDS		secY ,preprotein translocase subunit SecY	0	0	0	chromosome 1	Cytoplasmic Membrane	U	map02024,map03060,map03070	SecY
Bphy_2820	3171781	3172215	-	434	CDS		rplO ,50S ribosomal protein L15	0.00229885	1	0.000181966	chromosome 1	Cytoplasmic	J	map03010	Ribosomal_L27A
Bphy_2821	3172246	3172428	-	182	CDS		rpmD ,50S ribosomal protein L30	0	0	0	chromosome 1	Cytoplasmic	J	map03010	Ribosomal_L30
Bphy_2822	3172439	3172957	-	518	CDS		rpsE ,30S ribosomal protein S5	0	0	0	chromosome 1	Cytoplasmic	J	map03010	Ribosomal_S5,Ribosomal_S5_C
Bphy_2823	3172972	3173337	-	365	CDS		rplR ,50S ribosomal protein L18	0	0	0	chromosome 1	Cytoplasmic	J	map03010	Ribosomal_L18p
Bphy_2824	3173350	3173880	-	530	CDS		rplF ,50S ribosomal protein L6	0	0	0	chromosome 1	Unknown	J	map03010	Ribosomal_L6
Bphy_2825	3173900	3174295	-	395	CDS		rpsH ,30S ribosomal protein S8	0	0	0	chromosome 1	Cytoplasmic	J	map03010	Ribosomal_S8
Bphy_2826	3174310	3174615	-	305	CDS		rpsN ,30S ribosomal protein S14	0	0	0	chromosome 1	Cytoplasmic	J	map03010	Ribosomal_S14
Bphy_2827	3174623	3175162	-	539	CDS		rplE ,50S ribosomal protein L5	0.00185185	1	0.000146584	chromosome 1	Cytoplasmic	J	map03010	Ribosomal_L5,Ribosomal_L5_C
Bphy_2828	3175176	3175484	-	308	CDS		rplX ,50S ribosomal protein L24	0	0	0	chromosome 1	Cytoplasmic	J	map03010	KOW,ribosomal_L24
Bphy_2829	3175494	3175862	-	368	CDS		rplN ,50S ribosomal protein L14	0	0	0	chromosome 1	Cytoplasmic	J	map03010	Ribosomal_L14
Bphy_2830	3175880	3176020	-	140	CDS		hypothetical protein	0	0	0	chromosome 1
Bphy_2831	3176154	3176426	-	272	CDS		rpsQ ,30S ribosomal protein S17	0.003663	1	0.000289946	chromosome 1	Cytoplasmic	J	map03010	Ribosomal_S17
Bphy_2832	3176423	3176620	-	197	CDS		50S ribosomal protein L29	0	0	0	chromosome 1		J	map03010	Ribosomal_L29
Bphy_2833	3176628	3177044	-	416	CDS		rplP ,50S ribosomal protein L16	0.00239808	1	0.00018982	chromosome 1	Cytoplasmic	J	map03010	Ribosomal_L16
Bphy_2834	3177047	3177841	-	794	CDS		rpsC ,30S ribosomal protein S3	0.00125786	1	9.95662e-05	chromosome 1	Cytoplasmic	J	map03010	KH_2,Ribosomal_S3_C
Bphy_2835	3177853	3178182	-	329	CDS		rplV ,50S ribosomal protein L22	0.00606061	2	0.000479728	chromosome 1	Cytoplasmic	J	map03010	Ribosomal_L22
Bphy_2836	3178195	3178470	-	275	CDS		rpsS ,30S ribosomal protein S19	0	0	0	chromosome 1	Cytoplasmic	J	map03010	Ribosomal_S19
Bphy_2837	3178481	3179308	-	827	CDS		rplB ,50S ribosomal protein L2	0	0	0	chromosome 1	Cytoplasmic	J	map03010	Ribosomal_L2,Ribosomal_L2_C
Bphy_2838	3179311	3179625	-	314	CDS		rplW ,50S ribosomal protein L23	0	0	0	chromosome 1	Cytoplasmic	J	map03010	Ribosomal_L23
Bphy_2839	3179622	3180242	-	620	CDS		rplD ,50S ribosomal protein L4	0	0	0	chromosome 1	Unknown	J	map03010	Ribosomal_L4
Bphy_2840	3180242	3180901	-	659	CDS		rplC ,50S ribosomal protein L3	0	0	0	chromosome 1	Cytoplasmic	J	map03010	Ribosomal_L3
Bphy_2841	3181089	3181400	-	311	CDS		rpsJ ,30S ribosomal protein S10	0	0	0	chromosome 1	Cytoplasmic	J	map03010	Ribosomal_S10
Bphy_2843	3182766	3184868	-	2102	CDS		elongation factor G	0.000951022	2	7.52783e-05	chromosome 1	Cytoplasmic	J	-	EFG_C,EFG_II,EFG_IV,GTP_EFTU,GTP_EFTU_D2
Bphy_2844	3184997	3185467	-	470	CDS		30S ribosomal protein S7	0	0	0	chromosome 1	Cytoplasmic	J	map03010	Ribosomal_S7
Bphy_2845	3185647	3186027	-	380	CDS		rpsL ,30S ribosomal protein S12	0	0	0	chromosome 1	Cytoplasmic	J	map03010	Ribosom_S12_S23
Bphy_2847	3188308	3192549	-	4241	CDS		DNA-directed RNA polymerase subunit beta'	0	0	0	chromosome 1	Cytoplasmic	K	map00230,map00240,map01100,map03020	RNA_pol_Rpb1_1,RNA_pol_Rpb1_2,RNA_pol_Rpb1_3,RNA_pol_Rpb1_4,RNA_pol_Rpb1_5
Bphy_2848	3192571	3196677	-	4106	CDS		rpoB ,DNA-directed RNA polymerase subunit beta	0.000243487	1	1.92732e-05	chromosome 1	Cytoplasmic	K	map00230,map00240,map01100,map03020	RNA_pol_Rpb2_1,RNA_pol_Rpb2_2,RNA_pol_Rpb2_3,RNA_pol_Rpb2_45,RNA_pol_Rpb2_6,RNA_pol_Rpb2_7
Bphy_2849	3197048	3197425	-	377	CDS		rplL ,50S ribosomal protein L7/L12	0	0	0	chromosome 1	Unknown (This protein may have multiple localization sites)	J	map03010	Ribosomal_L12,Ribosomal_L12_N
Bphy_2850	3197501	3197998	-	497	CDS		rplJ ,50S ribosomal protein L10	0	0	0	chromosome 1	Cytoplasmic	J	map03010	Ribosomal_L10
Bphy_2851	3198302	3199000	-	698	CDS		rplA ,50S ribosomal protein L1	0	0	0	chromosome 1	Unknown	J	map03010	Ribosomal_L1
Bphy_2852	3199001	3199432	-	431	CDS		rplK ,50S ribosomal protein L11	0	0	0	chromosome 1	Cytoplasmic	J	map03010	Ribosomal_L11,Ribosomal_L11_N
Bphy_2853	3199584	3200141	-	557	CDS		nusG ,transcription antitermination protein NusG	0	0	0	chromosome 1	Cytoplasmic	K	-	KOW,NusG
Bphy_2854	3200143	3200523	-	380	CDS		secE ,preprotein translocase subunit SecE	0	0	0	chromosome 1	Cytoplasmic Membrane	U	map02024,map03060,map03070	SecE
Bphy_2890	3244370	3246187	-	1817	CDS		glucosamine--fructose-6-phosphate aminotransferase	0.00220022	4	0.000174159	chromosome 1	Cytoplasmic	M	map00250,map00520,map01100,map01130,map04931	GATase_6,SIS
Bphy_2893	3248730	3249122	-	392	CDS		dihydroneopterin aldolase	0.0101781	4	0.00080565	chromosome 1	Cytoplasmic	H	map00790,map01100	FolB
Bphy_2895	3250040	3251233	+	1193	CDS		hypothetical protein	0.0100503	12	0.000795529	chromosome 1	Cytoplasmic	S	-	Methyltransf_28
Bphy_2897	3251453	3252706	-	1253	CDS		cca ,multifunctional tRNA nucleotidyl transferase/2'3'-cyclic phosphodiesterase/2'nucleotidase/phosphatase	0.00637959	8	0.000504977	chromosome 1	Cytoplasmic	J	map03013	HD,PolyA_pol,PolyA_pol_RNAbd
Bphy_2916	3272293	3273123	-	830	CDS		5,10-methylenetetrahydrofolate reductase	0.00722022	6	0.000571517	chromosome 1	Cytoplasmic	E	map00670,map00720,map01100,map01120,map01200,map01523	MTHFR
Bphy_2917	3273142	3273582	-	440	CDS		hypothetical protein	0.00907029	4	0.00071796	chromosome 1		S	-	Phage_holin_4_2
Bphy_2918	3273656	3275077	-	1421	CDS		S-adenosyl-L-homocysteine hydrolase	0	0	0	chromosome 1	Cytoplasmic	H	map00270,map01100	AdoHcyase,AdoHcyase_NAD
Bphy_3022	3393280	3395538	-	2258	CDS		primosome assembly protein PriA	0.00354139	8	0.000280319	chromosome 1	Unknown	L	map03440	DEAD,Helicase_C,ResIII
Bphy_3027	3401310	3402704	-	1394	CDS		F0F1 ATP synthase subunit beta	0.000716846	1	5.6742e-05	chromosome 1	Cytoplasmic	F	map00190,map00195,map01100	ATP-synt_ab,ATP-synt_ab_N
Bphy_3028	3402795	3403682	-	887	CDS		F0F1 ATP synthase subunit gamma	0.00112613	1	8.91387e-05	chromosome 1	Cytoplasmic	C	map00190,map00195,map01100	ATP-synt
Bphy_3029	3403773	3405314	-	1541	CDS		F0F1 ATP synthase subunit alpha	0.00129702	2	0.000102666	chromosome 1	Cytoplasmic	F	map00190,map00195,map01100	ATP-synt_ab,ATP-synt_ab_C,ATP-synt_ab_N
Bphy_3030	3405373	3405912	-	539	CDS		F0F1 ATP synthase subunit delta	0	0	0	chromosome 1	Cytoplasmic	C	map00190,map00195,map01100	OSCP
Bphy_3031	3405915	3406385	-	470	CDS		F0F1 ATP synthase subunit B	0	0	0	chromosome 1	Cytoplasmic Membrane	C	map00190,map00195,map01100	ATP-synt_B
Bphy_3032	3406524	3406793	-	269	CDS		F0F1 ATP synthase subunit C	0	0	0	chromosome 1	Cytoplasmic Membrane	C	map00190,map00195,map01100	ATP-synt_C
Bphy_3033	3406880	3407731	-	851	CDS		F0F1 ATP synthase subunit A	0	0	0	chromosome 1	Cytoplasmic Membrane	C	map00190,map00195,map01100	ATP-synt_A
Bphy_3034	3407878	3408423	-	545	CDS		ATP synthase I chain	0	0	0	chromosome 1	Cytoplasmic Membrane	C	-	ATP-synt_I
Bphy_3036	3409866	3410798	-	932	CDS		parB-like partition protein	0	0	0	chromosome 1		K	-	ParBc
Bphy_3039	3412289	3414247	-	1958	CDS		tRNA uridine 5-carboxymethylaminomethyl modification protein GidA	0.00204186	4	0.000161624	chromosome 1	Cytoplasmic	D	-	GIDA,GIDA_assoc
Bphy_3064	3440191	3441306	-	1115	CDS		carboxylate-amine ligase	0.00268817	3	0.000212783	chromosome 1	Cytoplasmic	H	-	GCS2
Bphy_3065	3441460	3442662	-	1202	CDS		sodium/hydrogen exchanger	0.00249377	3	0.000197394	chromosome 1	Cytoplasmic Membrane	P	-	Na_H_Exchanger
Bphy_3098	3476508	3478160	-	1652	CDS		putative inner membrane protein translocase component YidC	0	0	0	chromosome 1	Cytoplasmic Membrane	U	map02024,map03060,map03070	60KD_IMP,YidC_periplas
Bphy_3100	3478495	3479004	-	509	CDS		ribonuclease P protein component	0.00392157	2	0.000310412	chromosome 1		J	-	Ribonuclease_P
Bphy_3101	3479030	3479164	-	134	CDS		rpmH ,50S ribosomal protein L34	0	0	0	chromosome 1	Cytoplasmic	J	map03010	Ribosomal_L34
Bphy_3141	3515705	3516805	-	1100	CDS	cbiD	cobalt-precorrin-6A synthase	0.00999092	11	0.000790832	chromosome 2	Unknown	H	map00860,map01100	CbiD
Bphy_3145	3520382	3521137	+	755	CDS		precorrin-2 C(20)-methyltransferase	0.0119048	9	0.000942323	chromosome 2	Cytoplasmic	H	map00860,map01100	TP_methylase
Bphy_3151	3534994	3536022	-	1028	CDS		magnesium chelatase	0.00388727	4	0.000307697	chromosome 2	Cytoplasmic	H	map00860,map01100,map01110	AAA_5,Mg_chelatase,VWA_2
Bphy_3157	3543739	3545043	+	1304	CDS		glutamine amidotransferase	0.0114943	15	0.000909829	chromosome 2	Unknown	H	map00860,map01100,map01120	CbiA,GATase_3
Bphy_3240	3640500	3641147	-	647	CDS		GTP cyclohydrolase II	0.00925926	6	0.000732918	chromosome 2	Cytoplasmic	H	map00740,map00790,map01100,map01110,map02024	GTP_cyclohydro2
Bphy_3423	3827929	3829053	+	1124	CDS		DNA methylase N-4/N-6 domain-containing protein	0.00266667	3	0.00021108	chromosome 2		L	-	N6_N4_Mtase
Bphy_3585	4007710	4008285	-	575	CDS		histone family protein nucleoid-structuring protein H-NS	0.00694444	4	0.000549688	chromosome 2	Unknown	S	-	Histone_HNS
Bphy_3690	4116479	4118473	+	1994	CDS		RNA polymerase, sigma 70 subunit, RpoD	0.00350877	7	0.000277737	chromosome 2	Cytoplasmic	K	-	Sigma70_ner,Sigma70_r1_1,Sigma70_r1_2,Sigma70_r2,Sigma70_r3,Sigma70_r4
Bphy_3719	4149224	4149847	+	623	CDS		OmpA/MotB domain-containing protein	0.0112179	7	0.000887958	chromosome 2	Unknown (This protein may have multiple localization sites)	M	-	OmpA
Bphy_3806	4250130	4251092	+	962	CDS		putative MxaL-like protein	0.0103842	10	0.000821964	chromosome 2		S	map00680,map01120	VWA_2
Bphy_3824	4269871	4271607	+	1736	CDS		peptidoglycan glycosyltransferase	0.00402994	7	0.00031899	chromosome 2	Cytoplasmic Membrane	M	map00550,map01501	PBP_dimer,Transpeptidase
Bphy_3941	4390414	4392471	-	2057	CDS		RNA polymerase sigma factor RpoD	0.0111759	23	0.00088463	chromosome 2		K	-	Sigma70_ner,Sigma70_r1_1,Sigma70_r1_2,Sigma70_r2,Sigma70_r3,Sigma70_r4
Bphy_3942	4392897	4394789	-	1892	CDS	dnaG	DNA primase	0.00105652	2	8.36293e-05	chromosome 2	Cytoplasmic	L	map03030	DnaB_bind,DnaG_DnaB_bind,Toprim_2,Toprim_4,Toprim_N,zf-CHC2
Bphy_3946	4397288	4398313	+	1025	CDS		putative DNA-binding/iron metalloprotein/AP endonuclease	0.00292398	3	0.000231448	chromosome 2	Extracellular	J	-	Peptidase_M22
Bphy_3948	4399347	4401245	-	1898	CDS		1-deoxy-D-xylulose-5-phosphate synthase	0	0	0	chromosome 2	Cytoplasmic	H	map00730,map00900,map01100,map01110,map01130	DXP_synthase_N,Transket_pyr,Transketolase_C
Bphy_3957	4410768	4412168	-	1400	CDS		histidine kinase	0.00999286	14	0.000790986	chromosome 2	Cytoplasmic Membrane	T	map02020	2CSK_N,HATPase_c,HisKA
Bphy_3998	4450922	4451587	-	665	CDS		hypothetical protein	0.00900901	6	0.000713109	chromosome 2	Unknown	-	-	-
Bphy_4040	4512372	4514165	+	1793	CDS		cyclic peptide transporter	0	0	0	chromosome 2	Cytoplasmic Membrane	PQ	map02010	ABC_membrane,ABC_tran
Bphy_4151	4620394	4621056	+	662	CDS		cobyrinic acid ac-diamide synthase	0.0015083	1	0.000119389	chromosome 2	Unknown	D	-	AAA_31
Bphy_4152	4621081	4622145	+	1064	CDS		parB-like partition protein	0.000938967	1	7.43241e-05	chromosome 2	Cytoplasmic	K	-	ParBc
Bphy_4153	4622190	4623539	-	1349	CDS		putative replication protein	0.00444444	6	0.000351801	chromosome 2	Cytoplasmic	L	-	Rep_3
Bphy_4231	4703712	4704029	+	317	CDS		Rieske (2Fe-2S) domain-containing protein	0.00943396	3	0.000746747	chromosome 2	Cytoplasmic	P	map00360,map01120,map01220	Rieske
Bphy_4306	4797824	4798921	-	1097	CDS		N-acylglucosamine 2-epimerase	0.00273224	3	0.000216271	chromosome 2	Unknown	G	map00051,map00520,map01100,map01110,map01130	GlcNAc_2-epim
Bphy_4344	4849229	4850248	+	1019	CDS		Flp pilus assembly protein CpaB	0.0117647	12	0.000931237	chromosome 2	Unknown	U	-	RcpC,SAF
Bphy_4345	4850280	4851635	+	1355	CDS		type II and III secretion system protein	0.0110619	15	0.00087561	chromosome 2	Outer Membrane	U	-	Secretin,T2SS-T3SS_pil_N
Bphy_4358	4865052	4866035	-	983	CDS		malate dehydrogenase	0	0	0	chromosome 2	Unknown	C	map00020,map00270,map00620,map00630,map00680,map00710,map00720,map01100,map01110,map01120,map01130,map01200	Ldh_1_C,Ldh_1_N
Bphy_4367	4872791	4874200	+	1409	CDS		isopropylmalate isomerase large subunit	0.00070922	1	5.61384e-05	chromosome 2	Cytoplasmic	H	map00290,map00660,map00966,map01100,map01110,map01210,map01230	Aconitase
Bphy_4368	4874449	4875102	+	653	CDS		leuD ,isopropylmalate isomerase small subunit	0	0	0	chromosome 2	Cytoplasmic	E	map00290,map00660,map01100,map01110,map01210,map01230	Aconitase_C
Bphy_4369	4875168	4876235	+	1067	CDS		3-isopropylmalate dehydrogenase	0.011236	12	0.000889383	chromosome 2	Cytoplasmic	CE	map00290,map00660,map01100,map01110,map01210,map01230	Iso_dh
Bphy_4370	4876544	4877665	+	1121	CDS		aspartate-semialdehyde dehydrogenase	0.000891266	1	7.05482e-05	chromosome 2	Cytoplasmic	E	map00260,map00261,map00270,map00300,map01100,map01110,map01120,map01130,map01210,map01230	Semialdhyde_dh,Semialdhyde_dhC
Bphy_4373	4880961	4881668	+	707	CDS		N-(5'-phosphoribosyl)anthranilate isomerase	0.00847458	6	0.000670806	chromosome 2	Unknown	E	map00400,map01100,map01110,map01130,map01230	PRAI
Bphy_4374	4881727	4882920	+	1193	CDS		tryptophan synthase subunit beta	0	0	0	chromosome 2	Cytoplasmic	E	map00260,map00400,map01100,map01110,map01130,map01230	PALP
Bphy_4377	4884778	4885650	+	872	CDS		acetyl-CoA carboxylase subunit beta	0.0045819	4	0.000362681	chromosome 2	Cytoplasmic	I	map00061,map00620,map00640,map00720,map01100,map01110,map01120,map01130,map01200,map01212	Carboxyl_trans
Bphy_4378	4885778	4887088	+	1310	CDS		FolC bifunctional protein	0.00762777	10	0.000603777	chromosome 2	Cytoplasmic	H	map00790,map01100	Mur_ligase_C,Mur_ligase_M
Bphy_4381	4888674	4890224	+	1550	CDS		amidophosphoribosyltransferase	0.00128949	2	0.00010207	chromosome 2	Cytoplasmic	F	map00230,map00250,map01100,map01110,map01130	GATase_6,GATase_7,Pribosyltran
Bphy_4412	4928952	4929923	-	971	CDS		homoserine kinase	0	0	0	chromosome 2	Cytoplasmic	F	map00260,map01100,map01110,map01120,map01230	APH
Bphy_4413	4930066	4930470	-	404	CDS		hypothetical protein	0.00740741	3	0.000586334	chromosome 2	Unknown	-	-	-
Bphy_4499	5024534	5024827	+	293	CDS		hypothetical protein	0.0102041	3	0.000807705	chromosome 2		-	-	-
Bphy_4669	5218266	5218538	+	272	CDS		ferredoxin	0.010989	3	0.000869837	chromosome 2	Unknown	C	-	Fer2_4
Bphy_4789	5335606	5335797	-	191	CDS		hypothetical protein	0.0104167	2	0.000824533	chromosome 2	Unknown
Bphy_4979	5549776	5551149	+	1373	CDS		hypothetical protein	0.0116448	16	0.000921748	chromosome 2	Cytoplasmic	-	-	-
Bphy_5246	5851990	5853036	-	1046	CDS		glycosyl transferase family protein	0.0105062	11	0.00083162	chromosome 2		M	-	Glycos_transf_2
Bphy_5450	6076268	6077323	+	1055	CDS		squalene/phytoene synthase	0.00568182	6	0.000449745	chromosome 2	Unknown	I	map00100,map00909,map01100,map01110,map01130	SQS_PSY
Bphy_5456	6081137	6083380	+	2243	CDS		isocitrate dehydrogenase, NADP-dependent	0.000445633	1	3.52741e-05	chromosome 2	Cytoplasmic	C	map00020,map00480,map00720,map01100,map01110,map01120,map01130,map01200,map01210,map01230,map04146	IDH
Bphy_5499	6129583	6130917	-	1334	CDS		argininosuccinate synthase	0	0	0	chromosome 2	Cytoplasmic	E	map00220,map00250,map01100,map01110,map01130,map01230,map05418	Arginosuc_synth
Bphy_5802	6485833	6486516	+	683	CDS		GntR family transcriptional regulator	0.0102339	7	0.000810067	plasmid pBPHY01	Cytoplasmic	K	-	FCD,GntR
Bphy_5844	6528399	6528578	-	179	CDS		eplicon_xref "NC_010625"	0.0111111	2	0.000879501	plasmid pBPHY01
Bphy_5932	6631944	6632768	-	824	CDS		formylmethanofuran dehydrogenase subunit C	0.0109091	9	0.000863511	plasmid pBPHY01	Cytoplasmic	C	map00680,map01100,map01120,map01200	GXGXG
Bphy_6207	6941302	6942063	+	761	CDS		hypothetical protein	0.011811	9	0.000934903	plasmid pBPHY01	Cytoplasmic Membrane	S	-	TauE
Bphy_6219	6958716	6959480	+	764	CDS		IclR family transcriptional regulator	0.0117647	9	0.000931237	plasmid pBPHY01	Cytoplasmic	K	-	HTH_IclR,IclR
Bphy_6275	7016208	7016822	-	614	CDS		eplicon_xref "NC_010625"	0.00487805	3	0.000386123	plasmid pBPHY01
Bphy_6366	7119747	7120766	-	1019	CDS		ABC transporter related	0.00882353	9	0.000698428	plasmid pBPHY01	Cytoplasmic Membrane	P	map02010	ABC_tran,TOBE_2
Bphy_6449	7208391	7208978	-	587	CDS		putative lipoprotein	0.0102041	6	0.000807705	plasmid pBPHY01	Unknown	S	-	Ysc84
Bphy_6632	7402444	7403175	-	731	CDS		hypothetical protein	0.00546448	4	0.000432542	plasmid pBPHY01	Unknown	-	-	-
Bphy_6634	7403934	7404335	-	401	CDS		hypothetical protein	0.00995025	4	0.000787613	plasmid pBPHY01		-	-	-
Bphy_6671	7444192	7444728	-	536	CDS		2Fe-2S iron-sulfur cluster binding domain-containing protein	0.00744879	4	0.00058961	plasmid pBPHY01	Cytoplasmic	C	map00365,map01120	Fer2,Fer2_2
Bphy_6693	7468709	7470889	-	2180	CDS		TonB-dependent siderophore receptor	0.00275103	6	0.000217758	plasmid pBPHY01	Outer Membrane	P	-	Plug,STN,TonB_dep_Rec
Bphy_7203	8033740	8034705	-	965	CDS		parB-like partition protein	0.00310559	3	0.000245823	plasmid pBPHY01	Cytoplasmic	K	-	ParBc
Bphy_7204	8034718	8035869	-	1151	CDS		cobyrinic acid ac-diamide synthase	0.00173611	2	0.000137422	plasmid pBPHY01	Unknown	D	-	AAA_31
Bphy_7205	8035956	8037257	-	1301	CDS		initiator RepB protein	0.00921659	12	0.00072954	plasmid pBPHY01	Cytoplasmic	L	-	Rep_3
Bphy_7319	8170282	8171349	+	1067	CDS		ATPase central domain-containing protein	0.0102996	11	0.000815268	plasmid pBPHY02		O	-	AAA
Bphy_7548	8398888	8399865	-	977	CDS		parB-like partition protein	0	0	0	plasmid pBPHY02	Cytoplasmic	K	-	ParBc
Bphy_7549	8399862	8401073	-	1211	CDS		cobyrinic acid ac-diamide synthase	0	0	0	plasmid pBPHY02	Unknown	D	-	AAA_31,MerR_1
Bphy_7550	8401728	8403134	+	1406	CDS		hypothetical protein	0.0021322	3	0.000168774	plasmid pBPHY02	Cytoplasmic	L	-	Rep_3
RNA_12	3201960	3202034	-	74	RNA	Bphy_R0070	tRNA-Thr	0	0	0
RNA_13	3200559	3200634	-	75	RNA	Bphy_R0069	tRNA-Trp	0	0	0
RNA_20	2260500	2260584	-	84	RNA	Bphy_R0062	tRNA-Leu	0	0	0
RNA_25	1934568	1934654	+	86	RNA	Bphy_R0057	tRNA-Leu	0.0114943	1	0.000909829
RNA_28	1766612	1766688	-	76	RNA	Bphy_R0054	tRNA-Val	0	0	0
RNA_32	1545419	1545494	-	75	RNA	Bphy_R0050	tRNA-Ala	0	0	0
RNA_33	1545199	1545274	-	75	RNA	Bphy_R0049	tRNA-Glu	0	0	0
RNA_34	1545046	1545122	-	76	RNA	Bphy_R0048	tRNA-Asp	0	0	0
RNA_44	967644	967718	-	74	RNA	Bphy_R0038	tRNA-Val	0	0	0
RNA_46	953165	953240	+	75	RNA	Bphy_R0036	tRNA-Gly	0	0	0
RNA_47	953020	953095	+	75	RNA	Bphy_R0035	tRNA-Gly	0	0	0
RNA_58	357741	357817	-	76	RNA	Bphy_R0024	tRNA-Gln	0	0	0

## Sheet: Raw data
start_coord	end_coord	strand	length	locus_type	locus_tag	gene_symbol	description	UID_ABS	UIC_ABS
362	1918	+	1556	CDS	Bphy_0001	dnaA	chromosomal replication initiation protein	0.00128452	2
2175	3278	+	1103	CDS	Bphy_0002		DNA polymerase III subunit beta	0.00181159	2
3392	5863	+	2471	CDS	Bphy_0003		gyrB ,DNA gyrase subunit B	0.000809061	2
5956	6237	-	281	CDS	Bphy_0004		hypothetical protein	0.131206	37
6240	7009	-	769	CDS	Bphy_0005		eplicon_xref "NC_010622"	0.102597	79
7331	8734	+	1403	CDS	Bphy_0006		ethanolamine transporter	0.0648148	91
8816	10210	+	1394	CDS	Bphy_0007		ethanolamine ammonia lyase large subunit	0.097491	136
10207	11001	+	794	CDS	Bphy_0008		ethanolamine ammonia-lyase small subunit	0.081761	65
11042	11434	-	392	CDS	Bphy_0009		hypothetical protein	0.0585242	23
11514	13034	-	1520	CDS	Bphy_0010		aldehyde dehydrogenase	0.0756082	115
13381	14397	+	1016	CDS	Bphy_0011		AraC family transcriptional regulator	0.105211	107
14834	15019	+	185	CDS	Bphy_0012		hypothetical protein	0.0913978	17
15034	16425	+	1391	CDS	Bphy_0013		ATP-dependent RNA helicase DbpA	0.111351	155
16752	17906	+	1154	CDS	Bphy_0014		putative aminotransferase	0.0727273	84
17921	18763	+	842	CDS	Bphy_0015		Nitrilase/cyanide hydratase and apolipoprotein N-acyltransferase	0.0688019	58
18797	19588	+	791	CDS	Bphy_0016		extracellular solute-binding protein	0.0719697	57
19749	20486	+	737	CDS	Bphy_0017		putative transmembrane anti-sigma factor	0.0582656	43
20605	21123	+	518	CDS	Bphy_0018		ECF subfamily RNA polymerase sigma-24 factor	0.088632	46
21120	21953	+	833	CDS	Bphy_0019		putative transmembrane anti-sigma factor	0.00839329	7
22125	22394	+	269	CDS	Bphy_0020		hypothetical protein	0.255556	69
22697	23020	+	323	CDS	Bphy_0021		eplicon_xref "NC_010622"	0.0648148	21
23411	25324	+	1913	CDS	Bphy_0022		type VI secretion protein	0.108673	208
25363	28020	+	2657	CDS	Bphy_0023		type VI secretion system Vgr family protein	0.158014	420
28054	28971	+	917	CDS	Bphy_0024		hypothetical protein	0.335512	308
29288	29647	+	359	CDS	Bphy_0025		hypothetical protein	0.25	90
29667	30656	+	989	CDS	Bphy_0026		hypothetical protein	0.19596	194
31178	31582	+	404	CDS	Bphy_0027		thioesterase superfamily protein	0.14321	58
31634	32500	+	866	CDS	Bphy_0028		patatin	0.178777	155
32555	33568	-	1013	CDS	Bphy_0029		D-isomer specific 2-hydroxyacid dehydrogenase	0.218935	222
33920	35776	+	1856	CDS	Bphy_0030		phosphoenolpyruvate carboxykinase	0.187399	348
36108	37196	+	1088	CDS	Bphy_0031		LysR family transcriptional regulator	0.12213	133
37341	40067	-	2726	CDS	Bphy_0032		DNA topoisomerase III	0	0
40305	40682	-	377	CDS	Bphy_0033		thioredoxin domain-containing protein	0.0925926	35
40737	41906	-	1169	CDS	Bphy_0034		DNA protecting protein DprA	0.154701	181
42162	42665	+	503	CDS	Bphy_0035	def	peptide deformylase	0.0337302	17
42691	43674	+	983	CDS	Bphy_0036		fmt ,methionyl-tRNA formyltransferase	0.00609756	6
43774	44418	+	644	CDS	Bphy_0037		lysine exporter protein LysE/YggA	0.164341	106
44522	45379	+	857	CDS	Bphy_0038		M48 family peptidase	0.110723	95
45662	47023	+	1361	CDS	Bphy_0039		sun protein	0.129222	176
47020	47610	+	590	CDS	Bphy_0040		hypothetical protein	0.0524535	31
47612	50023	+	2411	CDS	Bphy_0041		integral membrane sensor signal transduction histidine kinase	0.0588723	142
50024	50713	+	689	CDS	Bphy_0042		two component Fis family transcriptional regulator	0.0144928	10
51253	51984	+	731	CDS	Bphy_0043		exsB protein	0.034153	25
52054	52686	+	632	CDS	Bphy_0044		radical SAM domain-containing protein	0.00473934	3
52693	53139	+	446	CDS	Bphy_0045		queuosine biosynthesis protein QueD	0.0201342	9
53327	54109	+	782	CDS	Bphy_0046		2-dehydro-3-deoxyglucarate aldolase	0.0855683	67
54106	54816	+	710	CDS	Bphy_0047		Sel1 domain-containing protein	0.0914205	65
54875	56023	-	1148	CDS	Bphy_0048		rod shape-determining protein RodA	0	0
56034	58436	-	2402	CDS	Bphy_0049		penicillin-binding protein 2	0.000416146	1
58558	59070	-	512	CDS	Bphy_0050		rod shape-determining protein MreD	0.00194932	1
59067	60170	-	1103	CDS	Bphy_0051		rod shape-determining protein MreC	0	0
60289	61332	-	1043	CDS	Bphy_0052		rod shape-determining protein MreB	0.000957854	1
61712	62011	+	299	CDS	Bphy_0053		gatC ,aspartyl/glutamyl-tRNA amidotransferase subunit C	0.0266667	8
62165	63658	+	1493	CDS	Bphy_0054		gatA ,aspartyl/glutamyl-tRNA amidotransferase subunit A	0.000669344	1
63660	65135	+	1475	CDS	Bphy_0055		gatB ,aspartyl/glutamyl-tRNA amidotransferase subunit B	0	0
65270	66106	+	836	CDS	Bphy_0056		hypothetical protein	0.0573477	48
66149	66928	+	779	CDS	Bphy_0057		exodeoxyribonuclease III Xth	0.0615385	48
66953	68167	-	1214	CDS	Bphy_0058		peptidase M48 Ste24p	0.0353909	43
68167	69561	-	1394	CDS	Bphy_0059		major facilitator transporter	0.0293907	41
69575	70183	-	608	CDS	Bphy_0060		methionine biosynthesis protein MetW	0.0722496	44
70180	71325	-	1145	CDS	Bphy_0061		metX ,homoserine O-acetyltransferase	0.0061082	7
71569	72267	-	698	CDS	Bphy_0062		slmA ,nucleoid occlusion protein	0.125894	88
72304	73062	-	758	CDS	Bphy_0063		me "hypothetical protein (pseudogene) ,hypothetical protein (pseudogene)"	0.135705	103
72304	73062	-	758	CDS	Bphy_0063		me "hypothetical protein (pseudogene)"	0.135705	103
73262	74161	-	899	CDS	Bphy_0064		acetylglutamate kinase	0.00333333	3
74476	74751	+	275	CDS	Bphy_0065		hypothetical protein	0.123188	34
74789	76426	-	1637	CDS	Bphy_0066		TPR repeat-containing protein	0.128205	210
76529	77833	+	1304	CDS	Bphy_0067		integral membrane sensor signal transduction histidine kinase	0.0306513	40
77830	78372	+	542	CDS	Bphy_0068		two component Fis family transcriptional regulator	0.0092081	5
78455	79798	-	1343	CDS	Bphy_0069		hslU ,ATP-dependent protease ATP-binding subunit HslU	0.129464	174
79808	80344	-	536	CDS	Bphy_0070		ATP-dependent protease peptidase subunit	0.0819367	44
80718	81137	-	419	CDS	Bphy_0071		TraR/DksA family transcriptional regulator	0.00238095	1
81752	82840	-	1088	CDS	Bphy_0072		cobalamin synthesis protein P47K	0.0982553	107
83006	84208	-	1202	CDS	Bphy_0073		PUA domain-containing protein	0.130507	157
84294	85217	-	923	CDS	Bphy_0074		xerC ,site-specific tyrosine recombinase XerC	0.00324675	3
85228	85947	-	719	CDS	Bphy_0075		hypothetical protein	0.0388889	28
86034	86894	-	860	CDS	Bphy_0076	dapF	diaminopimelate epimerase	0.00116144	1
86949	87833	-	884	CDS	Bphy_0077		lipid A biosynthesis lauroyl acyltransferase	0.00225989	2
88106	89293	+	1187	CDS	Bphy_0078		S-adenosylmethionine synthetase	0.00252525	3
89507	89803	-	296	CDS	Bphy_0079		hypothetical protein	0.161616	48
90294	91055	+	761	CDS	Bphy_0080		phytanoyl-CoA dioxygenase	0.0866142	66
91100	91300	-	200	CDS	Bphy_0081		hypothetical protein	0.0696517	14
91610	92653	+	1043	CDS	Bphy_0082		aldo/keto reductase	0.159962	167
92765	92947	-	182	CDS	Bphy_0083		hypothetical protein	0.10929	20
93217	94488	-	1271	CDS	Bphy_0084		major facilitator transporter	0.100629	128
94454	95173	-	719	CDS	Bphy_0085		hypothetical protein	0.0888889	64
95551	95763	+	212	CDS	Bphy_0086		hypothetical protein	0.0516432	11
95889	96911	+	1022	CDS	Bphy_0087		serine/threonine protein kinase	0.085044	87
97214	97378	+	164	CDS	Bphy_0088		hypothetical protein	0.0969697	16
97489	98517	-	1028	CDS	Bphy_0089		hypothetical protein	0.125364	129
98490	99071	-	581	CDS	Bphy_0090		carbon monoxide dehydrogenase subunit G	0.130584	76
99062	100297	-	1235	CDS	Bphy_0091		VWA containing CoxE family protein	0.0809061	100
100303	101193	-	890	CDS	Bphy_0092		ATPase	0.0662177	59
101327	102124	-	797	CDS	Bphy_0093		carbon-monoxide dehydrogenase	0.0576441	46
102137	104524	-	2387	CDS	Bphy_0094		acylmolybdopterin binding aldehyde oxidase and xanthine dehydrogenase protein	0.0883585	211
104536	105036	-	500	CDS	Bphy_0095		2Fe-2S iron-sulfur cluster binding domain-containing protein	0.183633	92
105421	106821	-	1400	CDS	Bphy_0096		amino acid permease-associated protein	0.107066	150
106959	107615	-	656	CDS	Bphy_0097		two component LuxR family transcriptional regulator	0.129376	85
107677	108543	-	866	CDS	Bphy_0098		histidine kinase	0.160323	139
109090	109860	-	770	CDS	Bphy_0099		oxidoreductase FAD-binding subunit	0.0116732	9
110381	111022	-	641	CDS	Bphy_0100		lysine exporter protein LysE/YggA	0.166667	107
111526	111951	+	425	CDS	Bphy_0101		eplicon_xref "NC_010622"	0.105634	45
111967	112764	-	797	CDS	Bphy_0102		endonuclease/exonuclease/phosphatase	0.075188	60
112793	113299	-	506	CDS	Bphy_0103		hypothetical protein	0.193294	98
113629	114606	+	977	CDS	Bphy_0104		ATPase central domain-containing protein	0.184049	180
114837	115124	+	287	CDS	Bphy_0105		hypothetical protein	0.173611	50
115417	116523	+	1106	CDS	Bphy_0106		2-hydroxyglutarate dehydrogenase	0.114724	127
116726	117040	+	314	CDS	Bphy_0107		high potential iron-sulfur protein	0.12381	39
117052	117351	+	299	CDS	Bphy_0108		hypothetical protein	0.15	45
117293	118615	+	1322	CDS	Bphy_0109		general substrate transporter	0.0982615	130
118619	120133	-	1514	CDS	Bphy_0110		amidase	0.0759076	115
120270	120968	-	698	CDS	Bphy_0111		carboxymethylenebutenolidase	0.104435	73
121607	122752	+	1145	CDS	Bphy_0112		extracellular ligand-binding receptor	0.153578	176
122916	123914	+	998	CDS	Bphy_0113		transcription factor jumonji domain-containing protein	0.0850851	85
123950	125161	-	1211	CDS	Bphy_0114		major facilitator transporter	0.135314	164
125383	126048	+	665	CDS	Bphy_0115		pyridoxamine 5'-phosphate oxidase-like protein	0.189189	126
126407	126709	+	302	CDS	Bphy_0116		histone family protein nucleoid-structuring protein H-NS	0.128713	39
126957	128159	+	1202	CDS	Bphy_0117		cation diffusion facilitator family transporter	0.173732	209
128169	128627	-	458	CDS	Bphy_0118		AsnC family transcriptional regulator	0.213508	98
128731	129345	-	614	CDS	Bphy_0119		hypothetical protein	0.172358	106
129342	129986	-	644	CDS	Bphy_0120		beta-lactamase domain-containing protein	0.260465	168
130629	131228	+	599	CDS	Bphy_0121		rare lipoprotein A	0.18	108
131307	132182	-	875	CDS	Bphy_0122		uroporphyrin-III C/tetrapyrrole methyltransferase	0.124429	109
132181	132651	+	470	CDS	Bphy_0123		hypothetical protein	0.0870488	41
132877	133464	+	587	CDS	Bphy_0124		phosphoheptose isomerase	0.10034	59
133485	134288	+	803	CDS	Bphy_0125		transport-associated	0.121891	98
134285	134632	+	347	CDS	Bphy_0126		cytochrome c class I	0.109195	38
134929	136038	+	1109	CDS	Bphy_0127		hypothetical protein	0.135135	150
136035	137750	+	1715	CDS	Bphy_0128		feruloyl esterase	0.0967366	166
138001	138864	+	863	CDS	Bphy_0129		anti-sigma-factor antagonist	0.146991	127
138874	139230	+	356	CDS	Bphy_0130		anti-sigma-factor antagonist	0.134454	48
139250	139675	+	425	CDS	Bphy_0131		putative anti-sigma regulatory factor, serine/threonine protein kinase	0.122066	52
139660	140808	+	1148	CDS	Bphy_0132		putative anti-sigma regulatory factor, serine/threonine protein kinase	0.155788	179
140895	142343	+	1448	CDS	Bphy_0133		histidine kinase	0.135956	197
142340	143983	+	1643	CDS	Bphy_0134		histidine kinase	0.0723844	119
144107	149002	+	4895	CDS	Bphy_0135		multi-sensor hybrid histidine kinase	0.091299	447
149102	149725	+	623	CDS	Bphy_0136		hypothetical protein	0.11859	74
150067	151614	+	1547	CDS	Bphy_0137		methyl-accepting chemotaxis sensory transducer	0.100775	156
151789	153096	+	1307	CDS	Bphy_0138		uracil-xanthine permease	0.0978593	128
153168	154832	-	1664	CDS	Bphy_0139		Na+/H+ antiporter	0.0738739	123
155217	156491	+	1274	CDS	Bphy_0140		diguanylate phosphodiesterase	0.094902	121
156536	157225	+	689	CDS	Bphy_0141		CutC family protein	0.057971	40
157261	157557	-	296	CDS	Bphy_0142		eplicon_xref "NC_010622"	0.13468	40
157599	161189	-	3590	CDS	Bphy_0143		2-oxoacid ferredoxin oxidoreductase	0.106099	381
161632	162249	+	617	CDS	Bphy_0144		glutathione S-transferase domain-containing protein	0.124595	77
162277	163218	-	941	CDS	Bphy_0145		K+ channel inward rectifier domain-containing protein	0.112527	106
163365	163610	-	245	CDS	Bphy_0146		hypothetical protein	0.0772358	19
163714	163953	-	239	CDS	Bphy_0147		hypothetical protein	0.1125	27
164095	165021	-	926	CDS	Bphy_0148		ribokinase-like domain-containing protein	0.110032	102
165040	166302	-	1262	CDS	Bphy_0149		N-acylglucosamine 2-epimerase	0.12114	153
166299	167285	-	986	CDS	Bphy_0150		LacI family transcription regulator	0.0759878	75
167683	169524	-	1841	CDS	Bphy_0151		diguanylate cyclase/phosphodiesterase	0.137351	253
169801	170823	-	1022	CDS	Bphy_0152		bile acid:sodium symporter	0.13783	141
171381	171995	+	614	CDS	Bphy_0153		hypothetical protein	0.188618	116
172525	173628	+	1103	CDS	Bphy_0154		porin	0.178442	197
173794	174732	+	938	CDS	Bphy_0155		LysR family transcriptional regulator	0.105431	99
174860	178243	+	3383	CDS	Bphy_0156		methylmalonyl-CoA mutase large subunit	0.0904255	306
178306	179265	-	959	CDS	Bphy_0157		2-nitropropane dioxygenase	0.0947917	91
179525	180415	+	890	CDS	Bphy_0158		alpha/beta hydrolase fold protein	0.10101	90
180445	180930	-	485	CDS	Bphy_0159		AsnC family transcriptional regulator	0.109053	53
181042	181941	+	899	CDS	Bphy_0160		hypothetical protein	0.123333	111
182173	183093	-	920	CDS	Bphy_0161		beta-lactamase domain-containing protein	0.0912052	84
183090	183545	-	455	CDS	Bphy_0162		dehydratase	0.0526316	24
183542	183790	-	248	CDS	Bphy_0163		hypothetical protein	0.0401606	10
183787	184320	-	533	CDS	Bphy_0164		YbaK/prolyl-tRNA synthetase associated protein	0.071161	38
184342	185268	-	926	CDS	Bphy_0165		hydroxymethylglutaryl-CoA lyase	0.0916936	85
185385	186326	-	941	CDS	Bphy_0166		D-isomer specific 2-hydroxyacid dehydrogenase	0.126327	119
186570	187172	+	602	CDS	Bphy_0167		hypothetical protein	0.0961857	58
187197	187427	-	230	CDS	Bphy_0168		hypothetical protein	0.181818	42
187790	188815	+	1025	CDS	Bphy_0169		sulfate ABC transporter periplasmic sulfate-binding protein	0.114035	117
188981	190036	-	1055	CDS	Bphy_0170		biotin synthase	0.00757576	8
190073	190792	-	719	CDS	Bphy_0171		bioD ,dithiobiotin synthetase	0.00277778	2
190789	191973	-	1184	CDS	Bphy_0172		8-amino-7-oxononanoate synthase	0.000843882	1
191973	193319	-	1346	CDS	Bphy_0173		adenosylmethionine--8-amino-7-oxononanoate transaminase	0.00222717	3
193893	195182	-	1289	CDS	Bphy_0174		hypothetical protein	0.096124	124
195745	196191	-	446	CDS	Bphy_0175		hypothetical protein	0.138702	62
196210	197340	-	1130	CDS	Bphy_0176		acyl-CoA dehydrogenase domain-containing protein	0.0733864	83
197377	198054	-	677	CDS	Bphy_0177		short chain dehydrogenase	0.0914454	62
198103	199293	-	1190	CDS	Bphy_0178		acetyl-CoA acetyltransferase	0.070529	84
199286	200062	-	776	CDS	Bphy_0179		carbonate dehydratase	0.142857	111
200123	201931	-	1808	CDS	Bphy_0180	aceK	aceK ,bifunctional isocitrate dehydrogenase kinase/phosphatase protein	0.198452	359
202155	202589	-	434	CDS	Bphy_0181		MerR family transcriptional regulator	0.0850575	37
202753	203823	+	1070	CDS	Bphy_0182		beta-lactamase domain-containing protein	0.110177	118
203927	205525	-	1598	CDS	Bphy_0183		extracellular solute-binding protein	0.106316	170
205739	206551	-	812	CDS	Bphy_0184		periplasmic binding protein	0.108241	88
206555	207325	-	770	CDS	Bphy_0185		short chain dehydrogenase	0.118029	91
207344	207982	-	638	CDS	Bphy_0186		DSBA oxidoreductase	0.0219092	14
208136	208933	-	797	CDS	Bphy_0187		sporulation domain-containing protein	0.0551378	44
209034	210818	-	1784	CDS	Bphy_0188	argS	,arginyl-tRNA synthetase	0.000560224	1
211190	211516	+	326	CDS	Bphy_0189		hypothetical protein	0.0856269	28
211959	214676	-	2717	CDS	Bphy_0190		methionine synthase	0.0485651	132
214738	215808	-	1070	CDS	Bphy_0191		homocysteine S-methyltransferase	0.038282	41
216124	216381	-	257	CDS	Bphy_0192		hypothetical protein	0.139535	36
216499	217287	-	788	CDS	Bphy_0193		alpha/beta hydrolase fold protein	0.164766	130
217504	218733	-	1229	CDS	Bphy_0194		hypothetical protein	0.152846	188
218859	219749	-	890	CDS	Bphy_0195		IclR family transcriptional regulator	0.0998878	89
219910	220902	+	992	CDS	Bphy_0196		fumarylacetoacetate (FAA) hydrolase	0.133938	133
221102	222295	+	1193	CDS	Bphy_0197		extracellular ligand-binding receptor	0.099665	119
222377	223237	+	860	CDS	Bphy_0198		enoyl-CoA hydratase	0.087108	75
223414	224157	+	743	CDS	Bphy_0199		hypothetical protein	0.0873656	65
224717	225589	+	872	CDS	Bphy_0200		hypothetical protein	0.0469645	41
225714	226196	+	482	CDS	Bphy_0201		rfaE bifunctional protein	0.0351967	17
226244	226483	-	239	CDS	Bphy_0202		hypothetical protein	0.0375	9
226523	227392	-	869	CDS	Bphy_0203		pantothenate kinase	0.0091954	8
227389	228348	-	959	CDS	Bphy_0204		biotin--protein ligase	0.028125	27
228496	229635	+	1139	CDS	Bphy_0205		hypothetical protein	0.233333	266
229632	230522	+	890	CDS	Bphy_0206		ABC transporter-like protein	0.136925	122
230664	231626	+	962	CDS	Bphy_0207		hypothetical protein	0.126687	122
231645	232271	+	626	CDS	Bphy_0208		hypothetical protein	0.108453	68
232302	233462	+	1160	CDS	Bphy_0209		VanZ family protein	0.105943	123
233608	233931	+	323	CDS	Bphy_0210		putative ferredoxin	0.0987654	32
233954	234598	+	644	CDS	Bphy_0211		hypothetical protein	0.0713178	46
234977	236206	+	1229	CDS	Bphy_0212		Serine-type D-Ala-D-Ala carboxypeptidase	0.102439	126
236305	236574	+	269	CDS	Bphy_0213		hypothetical protein	0.0962963	26
236608	237612	-	1004	CDS	Bphy_0214		DNA-binding transcriptional activator GcvA	0.0915423	92
237711	238037	+	326	CDS	Bphy_0215		hypothetical protein	0.119266	39
238110	238877	+	767	CDS	Bphy_0216		lipB ,lipoate-protein ligase B	0.0117188	9
238891	239895	+	1004	CDS	Bphy_0217		lipoyl synthase	0.000995025	1
240128	241816	+	1688	CDS	Bphy_0218		sodium-dependent inorganic phosphate (Pi) transporter	0.098283	166
241824	242597	-	773	CDS	Bphy_0219		DeoR family transcriptional regulator	0.165375	128
243038	243802	+	764	CDS	Bphy_0220		ugpQ ,cytoplasmic glycerophosphodiester phosphodiesterase	0.175163	134
243893	244990	+	1097	CDS	Bphy_0221		extracellular solute-binding protein	0.0928962	102
245099	246043	+	944	CDS	Bphy_0222		binding-protein-dependent transport systems inner membrane component	0.11746	111
246040	246831	+	791	CDS	Bphy_0223		binding-protein-dependent transport systems inner membrane component	0.109848	87
246852	247931	+	1079	CDS	Bphy_0224		spermidine/putrescine ABC transporter ATPase	0.0861111	93
248341	249621	+	1280	CDS	Bphy_0225	dctA1	C4-dicarboxylate transporter DctA	0.00546448	7
249625	251676	+	2051	CDS	Bphy_0226		integral membrane sensor signal transduction histidine kinase	0.00389864	8
251706	253064	+	1358	CDS	Bphy_0227		two component, sigma54 specific, Fis family transcriptional regulator	0.013245	18
253149	253673	-	524	CDS	Bphy_0228		redoxin domain-containing protein	0.112381	59
253846	254454	+	608	CDS	Bphy_0229		hypothetical protein	0.182266	111
254787	256241	-	1454	CDS	Bphy_0230		Mg chelatase subunit ChlI	0.184192	268
256256	258205	+	1949	CDS	Bphy_0231		hypothetical protein	0.923077	1800
258183	260423	+	2240	CDS	Bphy_0232		hypothetical protein	0.92548	2074
260413	261009	+	596	CDS	Bphy_0233		hypothetical protein	0.971524	580
261016	262260	+	1244	CDS	Bphy_0234		hypothetical protein	1.02811	1280
262310	263497	-	1187	CDS	Bphy_0235		hypothetical protein	0.676768	804
263893	266946	+	3053	CDS	Bphy_0236		hypothetical protein	0.646365	1974
266943	269915	+	2972	CDS	Bphy_0237		SNF2-like protein	0.574168	1707
269916	270908	-	992	CDS	Bphy_0238		hypothetical protein	0.511581	508
270901	272640	-	1739	CDS	Bphy_0239		NERD domain-containing protein	0.577586	1005
272643	278936	-	6293	CDS	Bphy_0240		helicase superfamily protein	0.679536	4277
279209	279430	-	221	CDS	Bphy_0241		phage transcriptional regulator AlpA	0.468468	104
279867	280988	+	1121	CDS	Bphy_0242		integrase family protein	0.512478	575
281394	281735	+	341	CDS	Bphy_0243		hypothetical protein	0.374269	128
282639	286271	+	3632	CDS	Bphy_0244		hypothetical protein	0.0655106	238
286279	287766	+	1487	CDS	Bphy_0245		hypothetical protein	0.949597	1413
287759	292492	+	4733	CDS	Bphy_0246		hypothetical protein	0.829109	3925
292826	293647	-	821	CDS	Bphy_0247		hypothetical protein	0.93674	770
294196	294657	-	461	CDS	Bphy_0248		hypothetical protein	0.458874	212
294863	295270	+	407	CDS	Bphy_0249		XRE family transcriptional regulator	0.0686275	28
295405	296730	+	1325	CDS	Bphy_0250		hypothetical protein	0.557315	739
297155	297871	+	716	CDS	Bphy_0251		hypothetical protein	0.343096	246
297861	298133	-	272	CDS	Bphy_0252		XRE family transcriptional regulator	0.245421	67
298229	298702	+	473	CDS	Bphy_0253		hypothetical protein	0.303797	144
298886	299122	-	236	CDS	Bphy_0254		Mg chelatase subunit D/I family protein	0.379747	90
299223	299477	-	254	CDS	Bphy_0255		hypothetical protein	0.321569	82
299890	300228	+	338	CDS	Bphy_0256		nitrogen regulatory protein P-II	0.153392	52
300255	301760	+	1505	CDS	Bphy_0257		ammonium transporter	0.226428	341
302014	303303	+	1289	CDS	Bphy_0258		glutamate--cysteine ligase	0.149612	193
303493	304449	+	956	CDS	Bphy_0259		glutathione synthetase	0.103448	99
304730	305227	+	497	CDS	Bphy_0260		PTS system fructose subfamily transporter subunit IIA	0.0401606	20
305289	305558	+	269	CDS	Bphy_0261		phosphotransferase system, phosphocarrier protein HPr	0.122222	33
305778	307520	+	1742	CDS	Bphy_0262		phosphoenolpyruvate-protein phosphotransferase	0.194492	339
307568	308326	-	758	CDS	Bphy_0263		UBA/THIF-type NAD/FAD binding protein	0.0118577	9
308469	310061	-	1592	CDS	Bphy_0264		carboxyl-terminal protease	0.0646579	103
310206	310499	+	293	CDS	Bphy_0265		hypothetical protein	0.173469	51
310518	311264	-	746	CDS	Bphy_0266		gpmA ,phosphoglyceromutase	0.0107095	8
311357	311842	+	485	CDS	Bphy_0267		rhodanese domain-containing protein	0.1893	92
311854	312102	+	248	CDS	Bphy_0268		glutaredoxin 3	0.0923695	23
312296	312766	+	470	CDS	Bphy_0269		preprotein translocase subunit SecB	0.014862	7
312788	313786	+	998	CDS	Bphy_0270		gpsA ,NAD(P)H-dependent glycerol-3-phosphate dehydrogenase	0.01001	10
313940	314491	+	551	CDS	Bphy_0271		appr-1-p processing domain-containing protein	0.115942	64
314464	314934	-	470	CDS	Bphy_0272		RNA methyltransferase	0.118896	56
314952	315758	-	806	CDS	Bphy_0273		putative competence protein F-like protein	0.121437	98
315848	316807	+	959	CDS	Bphy_0274		type 11 methyltransferase	0.0145833	14
317078	317572	+	494	CDS	Bphy_0275		hypothetical protein	0.155556	77
317629	319302	+	1673	CDS	Bphy_0276		cytochrome c oxidase subunit II	0.0908005	152
319348	320961	+	1613	CDS	Bphy_0277		cytochrome c oxidase subunit I	0.0947955	153
321059	321196	+	137	CDS	Bphy_0278		hypothetical protein	0.0507246	7
321249	321860	+	611	CDS	Bphy_0279		cytochrome C oxidase assembly protein	0.168301	103
321900	322106	+	206	CDS	Bphy_0280		hypothetical protein	0.115942	24
322264	323121	+	857	CDS	Bphy_0281		cytochrome c oxidase subunit III	0.111888	96
323355	323564	-	209	CDS	Bphy_0282		hypothetical protein	0.133333	28
323652	324419	+	767	CDS	Bphy_0283		hypothetical protein	0.0989583	76
324480	325151	+	671	CDS	Bphy_0284		hypothetical protein	0.113095	76
325203	326312	+	1109	CDS	Bphy_0285		cytochrome oxidase assembly	0.1	111
326318	327223	+	905	CDS	Bphy_0286		protoheme IX farnesyltransferase	0.0364238	33
327228	327845	+	617	CDS	Bphy_0287		electron transport protein SCO1/SenC	0.152104	94
327923	328213	-	290	CDS	Bphy_0288		YciI-like protein	0.0687285	20
328433	330229	+	1796	CDS	Bphy_0289		methyl-accepting chemotaxis sensory transducer	0.0595437	107
330475	331287	+	812	CDS	Bphy_0290		YaeC family lipoprotein	0.146371	119
331378	332301	-	923	CDS	Bphy_0291		MarR family transcriptional regulator	0.101732	94
332679	333413	+	734	CDS	Bphy_0292		GntR family transcriptional regulator	0.115646	85
333493	334596	+	1103	CDS	Bphy_0293		N-acetylglucosamine-6-phosphate deacetylase	0.0788043	87
334589	335596	+	1007	CDS	Bphy_0294		glutamine--fructose-6-phosphate transaminase	0.0873016	88
335610	338195	+	2585	CDS	Bphy_0295		phosphoenolpyruvate-protein phosphotransferase	0.0696056	180
338304	340070	+	1766	CDS	Bphy_0296		PTS system N-acetylglucosamine-specific transporter subunit IIBC	0.0826259	146
340141	340260	-	119	CDS	Bphy_0297		cyd operon protein YbgT	0.116667	14
340272	341408	-	1136	CDS	Bphy_0298		cytochrome d ubiquinol oxidase subunit II	0.10642	121
341435	343024	-	1589	CDS	Bphy_0299		cytochrome bd ubiquinol oxidase subunit I	0.0918239	146
343014	343286	-	272	CDS	Bphy_0300		hypothetical protein	0.029304	8
343600	344535	-	935	CDS	Bphy_0301		RNA polymerase factor sigma-32	0.0352564	33
344862	345461	+	599	CDS	Bphy_0302		hypothetical protein	0.1	60
345507	345890	+	383	CDS	Bphy_0303		hypothetical protein	0.195312	75
346020	347675	-	1655	CDS	Bphy_0304		2-isopropylmalate synthase	0.116546	193
348195	349163	-	968	CDS	Bphy_0305		glycosyl transferase family protein	0.187822	182
349409	350107	+	698	CDS	Bphy_0306		fumarylacetoacetate (FAA) hydrolase	0.206009	144
350142	350786	+	644	CDS	Bphy_0307		maleylacetoacetate isomerase	0.186047	120
350900	352078	-	1178	CDS	Bphy_0308	ftsY	signal recognition particle-docking protein FtsY	0.00339271	4
352403	353017	+	614	CDS	Bphy_0309		methyltransferase	0.0910569	56
353135	353641	+	506	CDS	Bphy_0310	coaD	phosphopantetheine adenylyltransferase	0.0118343	6
353788	354045	+	257	CDS	Bphy_0311		4Fe-4S ferredoxin iron-sulfur binding domain-containing protein	0.108527	28
354115	355206	-	1091	CDS	Bphy_0312		histidinol-phosphate aminotransferase	0.124542	136
355246	355848	-	602	CDS	Bphy_0313		peptidyl-tRNA hydrolase	0.00829187	5
355969	356580	-	611	CDS	Bphy_0314		50S ribosomal protein L25/general stress protein Ctc	0.0179739	11
356737	357693	-	956	CDS	Bphy_0315		ribose-phosphate pyrophosphokinase	0.00104493	1
357869	358750	-	881	CDS	Bphy_0316		ipk ,4-diphosphocytidyl-2-C-methyl-D-erythritol kinase	0	0
358777	359409	-	632	CDS	Bphy_0317		lolB ,outer membrane lipoprotein LolB	0.00947867	6
359409	361250	-	1841	CDS	Bphy_0318		TPR repeat-containing protein	0.0401737	74
361338	362168	+	830	CDS	Bphy_0319		formamidopyrimidine-DNA glycosylase	0.160048	133
362176	363285	+	1109	CDS	Bphy_0320		A/G-specific adenine glycosylase	0.0810811	90
363296	363931	-	635	CDS	Bphy_0321		peptidase S16 lon domain-containing protein	0.11478	73
363991	364884	-	893	CDS	Bphy_0322		hypothetical protein	0.0749441	67
364962	365930	-	968	CDS	Bphy_0323		HPr kinase/phosphorylase	0.0154799	15
366165	366680	-	515	CDS	Bphy_0324		putative PTS IIA-like nitrogen-regulatory protein PtsN	0.00581395	3
366930	367289	-	359	CDS	Bphy_0325		sigma 54 modulation protein/30S ribosomal protein S30EA	0.161111	58
367463	368980	-	1517	CDS	Bphy_0326		RNA polymerase factor sigma-54	0.00329381	5
369208	369990	-	782	CDS	Bphy_0327		ABC transporter-like protein	0	0
369987	370664	-	677	CDS	Bphy_0328		lipopolysaccharide transport periplasmic protein LptA	0	0
370697	371290	-	593	CDS	Bphy_0329		hypothetical protein	0.0016835	1
371287	371850	-	563	CDS	Bphy_0330		3-deoxy-D-manno-octulosonate 8-phosphate phosphatase	0.0141844	8
371850	372890	-	1040	CDS	Bphy_0331		KpsF/GutQ family protein	0.0144092	15
372982	374985	+	2003	CDS	Bphy_0332		sodium/hydrogen exchanger	0.13523	271
375110	375676	+	566	CDS	Bphy_0333		adenine phosphoribosyltransferase	0.13933	79
375702	376316	+	614	CDS	Bphy_0334		lysine exporter protein LysE/YggA	0.107317	66
376371	377219	+	848	CDS	Bphy_0335		NUDIX hydrolase	0.104829	89
377293	378156	+	863	CDS	Bphy_0336		purU ,formyltetrahydrofolate deformylase	0.0752315	65
378233	379471	-	1238	CDS	Bphy_0337		PepSY-associated TM helix domain-containing protein	0.103309	128
379722	380807	-	1085	CDS	Bphy_0338		hypothetical protein	0.0939227	102
380830	383928	-	3098	CDS	Bphy_0339		excinuclease ABC subunit A	0.0909971	282
384242	385399	+	1157	CDS	Bphy_0340		major facilitator transporter	0.0405872	47
385525	386043	+	518	CDS	Bphy_0341		single-stranded DNA-binding protein	0.00770713	4
386164	386907	-	743	CDS	Bphy_0342		short-chain dehydrogenase/reductase SDR	0.0793011	59
387038	387943	+	905	CDS	Bphy_0343		LysR family transcriptional regulator	0.0673289	61
387950	388753	-	803	CDS	Bphy_0344		hypothetical protein	0.124378	100
389091	390734	+	1643	CDS	Bphy_0345		methyl-accepting chemotaxis sensory transducer	0.0991484	163
390851	391660	-	809	CDS	Bphy_0346		putative cytochrome c, class I	0.0679012	55
391657	393282	-	1625	CDS	Bphy_0347		cytochrome c oxidase subunit I	0.0713407	116
393269	393841	-	572	CDS	Bphy_0348		cytochrome c oxidase subunit II	0.0855148	49
393844	394026	-	182	CDS	Bphy_0349		hypothetical protein	0.0546448	10
394068	395453	-	1385	CDS	Bphy_0350		gluconate 2-dehydrogenase	0.0981241	136
395450	396172	-	722	CDS	Bphy_0351		putative periplasmic cytochrome c protein	0.102351	74
396568	397461	-	893	CDS	Bphy_0352		LysR family transcriptional regulator	0.100671	90
397559	398812	+	1253	CDS	Bphy_0353		major facilitator transporter	0.0964912	121
399472	400125	+	653	CDS	Bphy_0354		two component LuxR family transcriptional regulator	0.123853	81
400234	400944	+	710	CDS	Bphy_0355		two component LuxR family transcriptional regulator	0.158931	113
400999	401670	+	671	CDS	Bphy_0356		two component LuxR family transcriptional regulator	0.144345	97
401854	402597	+	743	CDS	Bphy_0357		major intrinsic protein	0.0994624	74
402606	407063	+	4457	CDS	Bphy_0358		PAS/PAC sensor hybrid histidine kinase	0.0655002	292
407255	407689	+	434	CDS	Bphy_0359		CHRD domain-containing protein	0.0850575	37
407857	408807	+	950	CDS	Bphy_0360		alpha/beta hydrolase domain-containing protein	0.0946372	90
408777	409619	-	842	CDS	Bphy_0361		hypothetical protein	0.116251	98
409827	411353	+	1526	CDS	Bphy_0362		EmrB/QacA family drug resistance transporter	0.0969221	148
411390	411860	+	470	CDS	Bphy_0363		MarR family transcriptional regulator	0.089172	42
411930	413207	-	1277	CDS	Bphy_0364		putative D-serine deaminase	0.104069	133
413349	414242	+	893	CDS	Bphy_0365		RpiR family transcriptional regulator	0.090604	81
414246	415733	+	1487	CDS	Bphy_0366		N-acyl-D-amino-acid deacylase	0.100806	150
415792	416178	+	386	CDS	Bphy_0367		endoribonuclease L-PSP	0.165375	64
416342	417166	-	824	CDS	Bphy_0368		queF ,7-cyano-7-deazaguanine reductase	0.0521212	43
417163	418065	-	902	CDS	Bphy_0369		5'-nucleotidase	0.0708749	64
418075	419598	-	1523	CDS	Bphy_0370		threonine dehydratase	0	0
420306	424421	+	4115	CDS	Bphy_0371		FAD linked oxidase domain-containing protein	0	0
424454	424882	+	428	CDS	Bphy_0372		histidine triad (HIT) protein	0.0769231	33
424891	425304	+	413	CDS	Bphy_0373		hypothetical protein	0.169082	70
425374	426105	+	731	CDS	Bphy_0374		ubiE ,ubiquinone/menaquinone biosynthesis methyltransferase	0.00819672	6
426142	427137	+	995	CDS	Bphy_0375		import inner membrane translocase subunit Tim44	0.0491968	49
427246	427890	+	644	CDS	Bphy_0376		sterol-binding domain-containing protein	0.0465116	30
427906	429489	+	1583	CDS	Bphy_0377		ubiB ,putative ubiquinone biosynthesis protein UbiB	0.00126263	2
429512	430153	+	641	CDS	Bphy_0378		thiopurine S-methyltransferase	0.183801	118
430292	430636	+	344	CDS	Bphy_0379		FmdB family regulatory protein	0.00289855	1
430707	431363	+	656	CDS	Bphy_0380		hypothetical protein	0.00152207	1
431436	433235	+	1799	CDS	Bphy_0381		aspS ,aspartyl-tRNA synthetase	0.000555556	1
433406	433882	+	476	CDS	Bphy_0382		NUDIX hydrolase	0.0901468	43
433879	435159	+	1280	CDS	Bphy_0383		phospholipase D/transphosphatidylase	0.0897736	115
435400	436005	+	605	CDS	Bphy_0384		TetR family transcriptional regulator	0.132013	80
436100	437887	+	1787	CDS	Bphy_0385		acyl-CoA dehydrogenase domain-containing protein	0.113535	203
438011	440455	+	2444	CDS	Bphy_0386		3-hydroxyacyl-CoA dehydrogenase	0.0809816	198
440467	441666	+	1199	CDS	Bphy_0387		acetyl-CoA acetyltransferase	0.0775	93
441843	442607	+	764	CDS	Bphy_0388		enoyl-CoA hydratase	0.0535948	41
442626	443447	-	821	CDS	Bphy_0389		formate dehydrogenase family accessory protein FdhD	0.124088	102
443564	444040	+	476	CDS	Bphy_0390		hypothetical protein	0.144654	69
444224	447346	+	3122	CDS	Bphy_0391		PAS/PAC sensor(s)-containing diguanylate cyclase/phosphodiesterase	0.106308	332
447404	447811	-	407	CDS	Bphy_0392		thioesterase superfamily protein	0.120098	49
448102	449997	+	1895	CDS	Bphy_0393		ABC transporter-like protein	0.0791139	150
450074	450772	-	698	CDS	Bphy_0394		nucleotidyl transferase	0.0615165	43
450784	451830	-	1046	CDS	Bphy_0395		aminoglycoside phosphotransferase	0.0725883	76
452101	454467	+	2366	CDS	Bphy_0396		organic solvent tolerance protein	0.000844951	2
454623	456014	+	1391	CDS	Bphy_0397		SurA domain-containing protein	0.0359195	50
456029	457030	+	1001	CDS	Bphy_0398		pdxA ,4-hydroxythreonine-4-phosphate dehydrogenase	0.00798403	8
457051	457881	+	830	CDS	Bphy_0399		ksgA ,dimethyladenosine transferase	0.0385078	32
458105	459232	+	1127	CDS	Bphy_0400		porin	0.10461	118
459311	459697	+	386	CDS	Bphy_0401		lactoylglutathione lyase	0.134367	52
459747	460604	-	857	CDS	Bphy_0402		hypothetical protein	0.0815851	70
460664	461422	-	758	CDS	Bphy_0403		phospholipid/glycerol acyltransferase	0.0764163	58
461460	462017	-	557	CDS	Bphy_0404		D,D-heptose 1,7-bisphosphate phosphatase	0.00896057	5
462028	464127	-	2099	CDS	Bphy_0405		glyS ,glycyl-tRNA synthetase subunit beta	0	0
464143	465150	-	1007	CDS	Bphy_0406		glyQ ,glycyl-tRNA synthetase subunit alpha	0.00198413	2
465377	467071	-	1694	CDS	Bphy_0407		lnt ,apolipoprotein N-acyltransferase	0	0
467108	468004	-	896	CDS	Bphy_0408		CBS domain-containing protein	0.0434783	39
468147	468806	-	659	CDS	Bphy_0409		ChaC family protein	0.0863636	57
468892	469353	-	461	CDS	Bphy_0410		hypothetical protein	0.012987	6
469384	470472	-	1088	CDS	Bphy_0411		PhoH family protein	0.0348944	38
470505	471875	-	1370	CDS	Bphy_0412		(dimethylallyl)adenosine tRNA methylthiotransferase	0.0386579	53
472090	473115	-	1025	CDS	Bphy_0413		LysR family transcriptional regulator	0.0984405	101
473226	473621	+	395	CDS	Bphy_0414		hypothetical protein	0.108586	43
473642	474820	+	1178	CDS	Bphy_0415		major facilitator transporter	0.0695505	82
475072	475761	+	689	CDS	Bphy_0416		XRE family transcriptional regulator	0.0666667	46
476228	476962	+	734	CDS	Bphy_0417		3,4-dihydroxy-2-butanone 4-phosphate synthase	0.0843537	62
477083	477769	-	686	CDS	Bphy_0418		HAD family hydrolase	0.0640466	44
477898	479397	-	1499	CDS	Bphy_0419		glpK ,glycerol kinase	0.0806667	121
479566	481101	-	1535	CDS	Bphy_0420		glpD ,glycerol-3-phosphate dehydrogenase	0.0989583	152
481314	481703	+	389	CDS	Bphy_0421		hypothetical protein	0.112821	44
481900	482097	-	197	CDS	Bphy_0422		hypothetical protein	0.0858586	17
482491	483270	-	779	CDS	Bphy_0423		DeoR family transcriptional regulator	0.0192308	15
483689	484516	+	827	CDS	Bphy_0424		hypothetical protein	0.120773	100
484555	485079	+	524	CDS	Bphy_0425		hypothetical protein	0.12381	65
485125	486693	-	1568	CDS	Bphy_0426		DEAD/DEAH box helicase domain-containing protein	0.0535373	84
486890	487510	-	620	CDS	Bphy_0427		hemolysin III family channel protein	0.181965	113
487684	488982	-	1298	CDS	Bphy_0428		gluconate 2-dehydrogenase	0.119323	155
489003	489722	-	719	CDS	Bphy_0429		cytochrome c class I	0.1375	99
490109	490591	+	482	CDS	Bphy_0430		copper resistance protein CopC	0.178054	86
490588	491517	+	929	CDS	Bphy_0431		copper resistance D domain-containing protein	0.149462	139
491555	491857	-	302	CDS	Bphy_0432		hypothetical protein	0.0726073	22
492157	493305	-	1148	CDS	Bphy_0433		galactonate dehydratase	0.147955	170
493390	494253	+	863	CDS	Bphy_0434		GntR domain-containing protein	0.0891204	77
494266	494960	-	694	CDS	Bphy_0435		eplicon_xref "NC_010622"	0.0690647	48
495065	495376	+	311	CDS	Bphy_0436		MarR family transcriptional regulator	0.112179	35
495664	497322	-	1658	CDS	Bphy_0437		major facilitator transporter	0.128391	213
497550	499097	-	1547	CDS	Bphy_0438		integral membrane sensor signal transduction histidine kinase	0.169251	262
499106	499867	-	761	CDS	Bphy_0439		two component transcriptional regulator	0.199475	152
500114	501190	+	1076	CDS	Bphy_0440		recA ,recombinase A	0.00371402	4
501198	501986	+	788	CDS	Bphy_0441		regulatory protein RecX	0.129278	102
502157	502894	+	737	CDS	Bphy_0442		hypothetical protein	0.097561	72
502950	504119	+	1169	CDS	Bphy_0443		sucC ,succinyl-CoA synthetase subunit beta	0.0871795	102
504234	505115	+	881	CDS	Bphy_0444		succinyl-CoA synthetase subunit alpha	0.0759637	67
505276	505989	+	713	CDS	Bphy_0445		integral membrane protein TerC	0.0896359	64
506140	506757	+	617	CDS	Bphy_0446		putative type IV fimbrial pilin protein	0.114887	71
507997	509703	+	1706	CDS	Bphy_0447		RNA-directed DNA polymerase	0.254833	435
509828	511618	+	1790	CDS	Bphy_0448		O-antigen polymerase	0.0971524	174
511705	512181	-	476	CDS	Bphy_0449		moaC ,molybdenum cofactor biosynthesis protein MoaC	0.127883	61
512380	514068	+	1688	CDS	Bphy_0450		peptidase M48 Ste24p	0.0746004	126
514065	514661	-	596	CDS	Bphy_0451		hypothetical protein	0.108878	65
514654	515667	-	1013	CDS	Bphy_0452		putative hydrolase of the alpha/beta-hydrolase fold	0.143984	146
515818	516264	-	446	CDS	Bphy_0453		hypothetical protein	0.165548	74
516441	517466	-	1025	CDS	Bphy_0454		lipopolysaccharide heptosyltransferase II	0.00584795	6
517654	517848	-	194	CDS	Bphy_0455		hypothetical protein	0.112821	22
517920	518843	-	923	CDS	Bphy_0456		branched-chain amino acid aminotransferase	0.0995671	92
519159	519914	+	755	CDS	Bphy_0457		AzlC family protein	0.12963	98
519911	520234	+	323	CDS	Bphy_0458		branched-chain amino acid transport	0.20679	67
520452	521645	+	1193	CDS	Bphy_0459		pgk ,phosphoglycerate kinase	0.00167504	2
522131	523567	+	1436	CDS	Bphy_0460		pyruvate kinase	0.105776	152
523822	524886	+	1064	CDS	Bphy_0461		fructose-1,6-bisphosphate aldolase	0.00375587	4
525017	525907	+	890	CDS	Bphy_0462		phosphoribosylaminoimidazole-succinocarboxamide synthase	0.00112233	1
525932	526441	+	509	CDS	Bphy_0463		phosphoribosylaminoimidazole carboxylase, catalytic subunit	0.00980392	5
526516	527724	+	1208	CDS	Bphy_0464		phosphoribosylaminoimidazole carboxylase ATPase subunit	0.00248139	3
527737	528780	+	1043	CDS	Bphy_0465		Sua5/YciO/YrdC/YwlC family protein	0.000957854	1
528871	530082	-	1211	CDS	Bphy_0466		GDSL family lipase	0.0684818	83
530287	530670	-	383	CDS	Bphy_0467		me "C-5 sterol desaturase (pseudogene) ,C-5 sterol desaturase (pseudogene)"	0.078125	30
530287	530670	-	383	CDS	Bphy_0467		me "C-5 sterol desaturase (pseudogene)"	0.078125	30
530868	532421	-	1553	CDS	Bphy_0468		D-alanyl-D-alanine carboxypeptidase/D-alanyl-D-alanine-endopeptidase	0.0624196	97
532855	533517	+	662	CDS	Bphy_0469		two component transcriptional regulator	0.0769231	51
533522	534823	+	1301	CDS	Bphy_0470		integral membrane sensor signal transduction histidine kinase	0.0660522	86
534937	536439	+	1502	CDS	Bphy_0471		protease Do	0.101796	153
536681	537178	+	497	CDS	Bphy_0472		hypothetical protein	0.128514	64
537575	538018	+	443	CDS	Bphy_0473		hypothetical protein	0.0765766	34
538052	538798	+	746	CDS	Bphy_0474		carbon monoxide dehydrogenase subunit G	0.136546	102
538886	539938	-	1052	CDS	Bphy_0475		AraC family transcriptional regulator	0.0712251	75
540086	540715	+	629	CDS	Bphy_0476		isochorismatase hydrolase	0.0968254	61
540808	541443	-	635	CDS	Bphy_0477		TetR family transcriptional regulator	0.0833333	53
541870	543120	+	1250	CDS	Bphy_0478		RND family efflux transporter MFP subunit	0.0359712	45
543138	546332	+	3194	CDS	Bphy_0479		hydrophobe/amphiphile efflux-1 (HAE1) family protein	0.0169014	54
546343	547860	+	1517	CDS	Bphy_0480		RND efflux system outer membrane lipoprotein	0.0191041	29
548106	549521	-	1415	CDS	Bphy_0481		xanthine permease	0.0861582	122
549945	551369	+	1424	CDS	Bphy_0482		carbohydrate kinase FGGY	0.111579	159
551563	552669	+	1106	CDS	Bphy_0483		S-(hydroxymethyl)glutathione dehydrogenase/class III alcohol dehydrogenase	0.0867209	96
552681	553526	+	845	CDS	Bphy_0484		S-formylglutathione hydrolase	0.0933806	79
553594	554385	-	791	CDS	Bphy_0485		ABC-3 protein	0.00757576	6
554378	555307	-	929	CDS	Bphy_0486		ABC transporter-like protein	0.00537634	5
555304	556233	-	929	CDS	Bphy_0487		periplasmic solute binding protein	0.00107527	1
556291	556782	-	491	CDS	Bphy_0488		ferric uptake regulator family protein	0.0447154	22
557071	557853	+	782	CDS	Bphy_0489		sorbitol dehydrogenase	0.144317	113
557943	559265	+	1322	CDS	Bphy_0490		extracellular solute-binding protein	0.0861678	114
559490	560428	+	938	CDS	Bphy_0491		binding-protein-dependent transport systems inner membrane component	0.0607029	57
560425	561291	+	866	CDS	Bphy_0492		binding-protein-dependent transport systems inner membrane component	0.0749712	65
561288	561980	+	692	CDS	Bphy_0493		HAD family hydrolase	0.047619	33
562070	563179	+	1109	CDS	Bphy_0494		ABC transporter-like protein	0.0846847	94
563428	565206	+	1778	CDS	Bphy_0495		TPR repeat-containing protein	0.0618325	110
565235	566203	-	968	CDS	Bphy_0496		DeoR family transcriptional regulator	0.0257998	25
566315	567799	-	1484	CDS	Bphy_0497		xylulokinase	0.0673401	100
567970	569379	-	1409	CDS	Bphy_0498		mannitol dehydrogenase domain-containing protein	0.0737589	104
569948	570967	+	1019	CDS	Bphy_0499		AraC family transcriptional regulator	0.0656863	67
571056	572021	+	965	CDS	Bphy_0500		periplasmic binding protein/LacI transcriptional regulator	0.0662526	64
572085	573620	+	1535	CDS	Bphy_0501		ABC transporter-like protein	0.0670573	103
573607	574608	+	1001	CDS	Bphy_0502		monosaccharide-transporting ATPase	0.0518962	52
574653	575741	+	1088	CDS	Bphy_0503		alcohol dehydrogenase	0.0697888	76
575810	577354	+	1544	CDS	Bphy_0504		xylulokinase	0.0601942	93
577351	578091	+	740	CDS	Bphy_0505		short chain dehydrogenase	0.0769231	57
578240	579175	-	935	CDS	Bphy_0506		tryptophan 2,3-dioxygenase	0.0897436	84
579186	580436	-	1250	CDS	Bphy_0507		kynureninase	0.0831335	104
580483	581112	-	629	CDS	Bphy_0508		arylformamidase	0.0555556	35
581244	581747	+	503	CDS	Bphy_0509		AsnC family transcriptional regulator	0.128968	65
581797	582321	-	524	CDS	Bphy_0510		flavin reductase domain-containing protein	0.106667	56
582616	583167	+	551	CDS	Bphy_0511		peptide methionine sulfoxide reductase	0.0960145	53
583234	584373	-	1139	CDS	Bphy_0512		hypothetical protein	0.0640351	73
584456	585670	-	1214	CDS	Bphy_0513		cyclopropane-fatty-acyl-phospholipid synthase	0.0938272	114
585846	586484	-	638	CDS	Bphy_0514		pyridoxamine 5'-phosphate oxidase	0.0125196	8
586736	587596	+	860	CDS	Bphy_0515		UBA/THIF-type NAD/FAD binding protein	0.0743322	64
587687	588535	-	848	CDS	Bphy_0516		thioredoxin	0.121319	103
588649	589530	-	881	CDS	Bphy_0517		pirin domain-containing protein	0.168934	149
589700	590581	+	881	CDS	Bphy_0518		hypothetical protein	0.0986395	87
590711	592258	-	1547	CDS	Bphy_0519		N-acetylmuramoyl-L-alanine amidase	0.00129199	2
592240	592794	-	554	CDS	Bphy_0520		hypothetical protein	0	0
592812	594104	+	1292	CDS	Bphy_0521		iron-sulfur cluster binding protein	0.033256	43
594145	594615	+	470	CDS	Bphy_0522		methylated-DNA--protein-cysteine methyltransferase	0.0615711	29
594612	595559	+	947	CDS	Bphy_0523		xerD ,site-specific tyrosine recombinase XerD	0.0158228	15
595584	597161	-	1577	CDS	Bphy_0524		AMP-dependent synthetase and ligase	0.108999	172
597309	597836	+	527	CDS	Bphy_0525		ybaK/ebsC protein	0.0814394	43
597994	598626	+	632	CDS	Bphy_0526		putative glycerol-3-phosphate acyltransferase PlsY	0.0110585	7
598702	599187	-	485	CDS	Bphy_0527		putative nucleotide-binding protein	0.133745	65
599359	600399	+	1040	CDS	Bphy_0528		murB ,UDP-N-acetylenolpyruvoylglucosamine reductase	0.000960615	1
600499	601428	-	929	CDS	Bphy_0529		ornithine carbamoyltransferase	0.00107527	1
601890	602225	+	335	CDS	Bphy_0530		hypothetical protein	0.0208333	7
602428	602706	-	278	CDS	Bphy_0531		rpsT ,30S ribosomal protein S20	0.00716846	2
603187	604737	+	1550	CDS	Bphy_0532		integral membrane protein MviN	0.00128949	2
604734	605585	+	851	CDS	Bphy_0533		hypothetical protein	0.0692488	59
605666	606424	-	758	CDS	Bphy_0534		short-chain dehydrogenase/reductase SDR	0.0513834	39
606652	607317	-	665	CDS	Bphy_0535		adk ,adenylate kinase	0	0
607579	608382	-	803	CDS	Bphy_0536		3-deoxy-manno-octulosonate cytidylyltransferase	0.00497512	4
608514	608717	-	203	CDS	Bphy_0537		hypothetical protein	0.0196078	4
608698	609714	-	1016	CDS	Bphy_0538		tetraacyldisaccharide 4'-kinase	0	0
610302	611681	+	1379	CDS	Bphy_0539		xseA ,exodeoxyribonuclease VII large subunit	0.0934783	129
611889	612467	+	578	CDS	Bphy_0540		superoxide dismutase	0.00518135	3
612689	614011	-	1322	CDS	Bphy_0541		hypothetical protein	0.0748299	99
614099	614698	-	599	CDS	Bphy_0542		isochorismatase hydrolase	0.0516667	31
614747	615358	+	611	CDS	Bphy_0543		TetR family transcriptional regulator	0.0326797	20
615380	616033	-	653	CDS	Bphy_0544		ATP-dependent Clp protease, proteolytic subunit ClpP	0.058104	38
616193	617152	+	959	CDS	Bphy_0545		ECF subfamily RNA polymerase sigma-24 factor	0.040625	39
617108	618382	-	1274	CDS	Bphy_0546		diguanylate phosphodiesterase	0.0305882	39
618653	620122	-	1469	CDS	Bphy_0547		EmrB/QacA family drug resistance transporter	0.0605442	89
620238	621650	-	1412	CDS	Bphy_0548		transcriptional regulator	0.0629866	89
621832	622143	+	311	CDS	Bphy_0549		hypothetical protein	0.0480769	15
622170	623414	-	1244	CDS	Bphy_0550		citrate synthase	0.0578313	72
623533	624927	+	1394	CDS	Bphy_0551		L-carnitine dehydratase/bile acid-inducible protein F	0.0616487	86
624955	625701	-	746	CDS	Bphy_0552		GntR family transcriptional regulator	0.0414993	31
625881	626726	+	845	CDS	Bphy_0553		aldo/keto reductase	0.0614657	52
626781	627248	+	467	CDS	Bphy_0554		hypothetical protein	0.0641026	30
627422	629527	-	2105	CDS	Bphy_0555		oligopeptide/dipeptide ABC transporter ATPase	0.0660019	139
629524	630423	-	899	CDS	Bphy_0556		binding-protein-dependent transport systems inner membrane component	0.0311111	28
630420	631430	-	1010	CDS	Bphy_0557		binding-protein-dependent transport systems inner membrane component	0.0563798	57
631460	633145	-	1685	CDS	Bphy_0558		extracellular solute-binding protein	0.0729537	123
633404	634423	-	1019	CDS	Bphy_0559		high-affinity nickel-transporter	0.0656863	67
634452	634937	-	485	CDS	Bphy_0560		cupin 2 domain-containing protein	0.0843621	41
635154	637259	-	2105	CDS	Bphy_0561		translation elongation factor G	0.0944919	199
637527	638042	-	515	CDS	Bphy_0562		hypothetical protein	0.100775	52
638164	638406	+	242	CDS	Bphy_0563		hypothetical protein	0.152263	37
638815	639384	-	569	CDS	Bphy_0564		pseudouridine synthase	0.131579	75
639716	640972	+	1256	CDS	Bphy_0565		isocitrate dehydrogenase	0.121718	153
641531	642664	+	1133	CDS	Bphy_0566		eplicon_xref "NC_010622"	0.0714286	81
642761	642967	-	206	CDS	Bphy_0567		cold-shock DNA-binding domain-containing protein	0.188406	39
643500	643814	+	314	CDS	Bphy_0568	clpS	clpS ,ATP-dependent Clp protease adaptor protein ClpS	0.231746	73
643811	646111	+	2300	CDS	Bphy_0569		ATP-dependent Clp protease, ATP-binding subunit clpA	0.10691	246
646213	646659	-	446	CDS	Bphy_0570		deoxyuridine 5'-triphosphate nucleotidohydrolase Dut	0.0246085	11
646724	647728	-	1004	CDS	Bphy_0571		luciferase family protein	0.0746269	75
647802	649013	-	1211	CDS	Bphy_0572		bifunctional phosphopantothenoylcysteine decarboxylase/phosphopantothenate synthase	0.00660066	8
649163	649663	-	500	CDS	Bphy_0573		lspA ,lipoprotein signal peptidase	0.0139721	7
649663	652500	-	2837	CDS	Bphy_0574		ileS ,isoleucyl-tRNA synthetase	0	0
652688	653680	-	992	CDS	Bphy_0575		bifunctional riboflavin kinase/FMN adenylyltransferase	0.00503525	5
653799	654464	+	665	CDS	Bphy_0576		phosphoribosylglycinamide formyltransferase	0.018018	12
654461	655720	+	1259	CDS	Bphy_0577		Fmu (Sun) domain-containing protein	0.121429	153
655807	657162	+	1355	CDS	Bphy_0578		mechanosensitive ion channel MscS	0.165929	225
657363	658565	+	1202	CDS	Bphy_0579		fatty acid desaturase	0.00166251	2
658697	659827	+	1130	CDS	Bphy_0580		quinolinate synthetase	0	0
659827	660729	+	902	CDS	Bphy_0581		nicotinate-nucleotide pyrophosphorylase	0.00110742	1
660810	662408	-	1598	CDS	Bphy_0582		L-aspartate oxidase	0.000625391	1
662653	662820	-	167	CDS	Bphy_0583		rpmG ,50S ribosomal protein L33	0.047619	8
662831	663064	-	233	CDS	Bphy_0584		rpmB ,50S ribosomal protein L28	0.0042735	1
663323	664051	-	728	CDS	Bphy_0585		radC ,DNA repair protein RadC	0.139918	102
664241	664696	+	455	CDS	Bphy_0586		FKBP-type peptidylprolyl isomerase	0.00657895	3
664699	665658	+	959	CDS	Bphy_0587		ispH ,4-hydroxy-3-methylbut-2-enyl diphosphate reductase	0.00208333	2
666197	667396	+	1199	CDS	Bphy_0588		extracellular ligand-binding receptor	0.1225	147
667624	668574	+	950	CDS	Bphy_0589		inner-membrane translocator	0.116719	111
668602	669771	+	1169	CDS	Bphy_0590		inner-membrane translocator	0.104274	122
669794	670570	+	776	CDS	Bphy_0591		ABC transporter-like protein	0.03861	30
670570	671286	+	716	CDS	Bphy_0592		ABC transporter-like protein	0.0753138	54
671449	671910	-	461	CDS	Bphy_0593		putative acetyltransferase	0.0519481	24
671907	673091	-	1184	CDS	Bphy_0594	argD1	acetylornithine transaminase protein	0.0236287	28
673139	673366	+	227	CDS	Bphy_0595		hypothetical protein	0.0921053	21
673422	674453	-	1031	CDS	Bphy_0596		CDP-6-deoxy-delta-3,4-glucoseen reductase	0.117248	121
674491	675579	+	1088	CDS	Bphy_0597		NAD-dependent epimerase/dehydratase	0.0514233	56
675600	675788	-	188	CDS	Bphy_0598		hypothetical protein	0.121693	23
675954	676658	-	704	CDS	Bphy_0599		pseudouridine synthase	0.131915	93
676971	677900	-	929	CDS	Bphy_0600		hypothetical protein	0.103226	96
678209	679609	+	1400	CDS	Bphy_0601		amino acid permease-associated protein	0.104211	146
680339	681751	-	1412	CDS	Bphy_0602		coproporphyrinogen III oxidase	0.0863411	122
682009	682305	+	296	CDS	Bphy_0603		hypothetical protein	0.131313	39
682395	682988	+	593	CDS	Bphy_0604		hypothetical protein	0.121212	72
683062	683898	+	836	CDS	Bphy_0605		undecaprenyl pyrophosphate phosphatase	0.00597372	5
683989	684795	-	806	CDS	Bphy_0606		trmB ,tRNA (guanine-N(7)-)-methyltransferase	0.0334572	27
685152	685715	-	563	CDS	Bphy_0607		hypothetical protein	0.111702	63
685852	686172	-	320	CDS	Bphy_0608	ethD1	ethyl tert-butyl ether degradation EthD	0.0903427	29
686385	687264	-	879	CDS	Bphy_0609		eplicon_xref "NC_010622"	0.159091	140
687534	687695	+	161	CDS	Bphy_0610		hypothetical protein	0.179012	29
687673	687927	-	254	CDS	Bphy_0611		hypothetical protein	0.145098	37
688090	688386	+	296	CDS	Bphy_0612		hypothetical protein	0.242424	72
688503	689183	-	680	CDS	Bphy_0613		lysine exporter protein LysE/YggA	0.126285	86
689259	690836	-	1577	CDS	Bphy_0614		UbiD family decarboxylase	0.0449937	71
691442	692656	+	1214	CDS	Bphy_0615		lytic transglycosylase	0.090535	110
692737	693930	-	1193	CDS	Bphy_0616		aminotransferase	0.0812395	97
694054	694491	-	437	CDS	Bphy_0617		nusB ,transcription antitermination protein NusB	0.0228311	10
694488	695006	-	518	CDS	Bphy_0618		ribH ,6,7-dimethyl-8-ribityllumazine synthase	0.00578035	3
695096	696232	-	1136	CDS	Bphy_0619		bifunctional 3,4-dihydroxy-2-butanone 4-phosphate synthase/GTP cyclohydrolase II-like protein	0.0729991	83
696347	696961	-	614	CDS	Bphy_0620		riboflavin synthase subunit alpha	0.0211382	13
696986	698107	-	1121	CDS	Bphy_0621		riboflavin biosynthesis protein RibD	0	0
698147	699427	-	1280	CDS	Bphy_0622		glutamate-1-semialdehyde aminotransferase	0.00234192	3
699638	700288	-	650	CDS	Bphy_0623		hypothetical protein	0.129032	84
700482	701690	+	1208	CDS	Bphy_0624		Bcr/CflA subfamily drug resistance transporter	0.0909843	110
701847	703766	-	1919	CDS	Bphy_0625		bifunctional glucokinase/RpiR family transcriptional regulator	0.0802083	154
703744	704451	-	707	CDS	Bphy_0626		6-phosphogluconolactonase	0.101695	72
704599	706056	-	1457	CDS	Bphy_0627		glucose-6-phosphate 1-dehydrogenase	0.0768176	112
706586	707833	+	1247	CDS	Bphy_0628		extracellular solute-binding protein	0.125801	157
707985	708926	+	941	CDS	Bphy_0629		binding-protein-dependent transport systems inner membrane component	0.10828	102
708916	709773	+	857	CDS	Bphy_0630		binding-protein-dependent transport systems inner membrane component	0.113054	97
709892	711007	+	1115	CDS	Bphy_0631		ABC transporter-like protein	0.138889	155
711199	711819	-	620	CDS	Bphy_0632		hypothetical protein	0.173913	108
711835	712635	-	800	CDS	Bphy_0633		Smr protein/MutS2	0.0923845	74
712813	713814	-	1001	CDS	Bphy_0634		thioredoxin reductase	0.00399202	4
714314	716581	+	2267	CDS	Bphy_0635		cell division FtsK/SpoIIIE	0.00661376	15
716618	717313	+	695	CDS	Bphy_0636		lolA ,outer-membrane lipoprotein carrier protein	0.00574713	4
717321	718235	-	914	CDS	Bphy_0637		LysR family transcriptional regulator	0.073224	67
718397	719389	+	992	CDS	Bphy_0638		agmatinase	0.0725076	72
719663	721291	+	1628	CDS	Bphy_0639		TPR repeat-containing protein	0.0890117	145
721311	722627	-	1316	CDS	Bphy_0640		hydroxymethylpyrimidine transporter CytX	0.095672	126
722871	724232	+	1361	CDS	Bphy_0641		recombination factor protein RarA	0.0800294	109
724326	725624	+	1298	CDS	Bphy_0642		seryl-tRNA synthetase	0	0
726158	726388	+	230	CDS	Bphy_0643		hypothetical protein	0.0649351	15
726816	728279	+	1463	CDS	Bphy_0644		PAS/PAC sensor signal transduction histidine kinase	0.068306	100
728276	728998	+	722	CDS	Bphy_0645		two component LuxR family transcriptional regulator	0.0373444	27
729061	729447	+	386	CDS	Bphy_0646		response regulator receiver protein	0.108527	42
729678	730955	+	1277	CDS	Bphy_0647		RND family efflux transporter MFP subunit	0.0938967	120
731005	734274	+	3269	CDS	Bphy_0648		hydrophobe/amphiphile efflux-1 (HAE1) family protein	0.0767584	251
734276	735766	+	1490	CDS	Bphy_0649		RND efflux system outer membrane lipoprotein	0.100604	150
735763	737112	+	1349	CDS	Bphy_0650		PqiA family integral membrane protein	0.0748148	101
737109	738713	+	1604	CDS	Bphy_0651		hypothetical protein	0.05919	95
738710	739300	+	590	CDS	Bphy_0652		hypothetical protein	0.072758	43
739727	740512	+	785	CDS	Bphy_0653		methionine aminopeptidase, type I	0.0776081	61
740735	741277	+	542	CDS	Bphy_0654		GCN5-like N-acetyltransferase	0.0902394	49
741479	742327	+	848	CDS	Bphy_0655		septum formation inhibitor	0.06596	56
742417	743232	+	815	CDS	Bphy_0656		septum site-determining protein MinD	0.0453431	37
743248	743502	+	254	CDS	Bphy_0657	minE	cell division topological specificity factor MinE	0.0627451	16
743764	744075	+	311	CDS	Bphy_0658		hypothetical protein	0.137821	43
744198	744311	+	113	CDS	Bphy_0659		hypothetical protein	0.114035	13
744381	745838	-	1457	CDS	Bphy_0660		chloride channel core	0.105624	154
746046	747056	+	1010	CDS	Bphy_0661		lipopolysaccharide heptosyltransferase I	0.144411	146
747877	748056	-	179	CDS	Bphy_0662		hypothetical protein	0.0888889	16
748289	749596	-	1307	CDS	Bphy_0663		general substrate transporter	0.100917	132
750119	750631	-	512	CDS	Bphy_0664		TonB protein	0.0935673	48
750937	752151	-	1214	CDS	Bphy_0665		coproporphyrinogen III oxidase	0.0831276	101
752148	752771	-	623	CDS	Bphy_0666		putative deoxyribonucleotide triphosphate pyrophosphatase	0.0625	39
752764	753504	-	740	CDS	Bphy_0667		rph ,ribonuclease PH	0.0823212	61
753770	754729	+	959	CDS	Bphy_0668		hypothetical protein	0.0947917	91
754746	755432	+	686	CDS	Bphy_0669		gmk ,guanylate kinase	0.00727802	5
755495	755698	+	203	CDS	Bphy_0670		DNA-directed RNA polymerase subunit omega	0.0196078	4
755774	758158	+	2384	CDS	Bphy_0671	spoT	(p)ppGpp synthetase I SpoT/RelA	0.00838574	20
758244	758732	+	488	CDS	Bphy_0672		hypothetical protein	0.0797546	39
759177	759749	+	572	CDS	Bphy_0673		greB ,transcription elongation factor GreB	0.118674	68
759858	761003	-	1145	CDS	Bphy_0674		porin	0.013089	15
761527	761769	-	242	CDS	Bphy_0675		hypothetical protein	0.17284	42
762175	762378	+	203	CDS	Bphy_0676		cold-shock DNA-binding domain-containing protein	0.52451	107
762698	763876	+	1178	CDS	Bphy_0677		DNA polymerase III subunit epsilon	0.262935	310
763873	764496	-	623	CDS	Bphy_0678		chorismate mutase	0.105769	66
764799	764948	-	149	CDS	Bphy_0679		hypothetical protein	0.04	6
765211	765549	+	338	CDS	Bphy_0680		me "hypothetical protein (pseudogene) ,hypothetical protein (pseudogene)"	0.0973451	33
765211	765549	+	338	CDS	Bphy_0680		me "hypothetical protein (pseudogene)"	0.0973451	33
765960	766211	+	251	CDS	Bphy_0681		eplicon_xref "NC_010622"	0.0674603	17
766231	767175	-	944	CDS	Bphy_0682		LysR family transcriptional regulator	0.0772487	73
767269	768519	+	1250	CDS	Bphy_0683		Formyl-CoA transferase	0.0647482	81
768512	769651	+	1139	CDS	Bphy_0684		acyl-CoA dehydrogenase domain-containing protein	0.0815789	93
769912	770928	-	1016	CDS	Bphy_0685		fructose-1,6-bisphosphatase	0.00294985	3
771230	774013	-	2783	CDS	Bphy_0686		pepN ,aminopeptidase N	0.0650144	181
774129	774830	+	701	CDS	Bphy_0687		putative transmembrane lipoprotein	0.155271	109
774937	775509	-	572	CDS	Bphy_0688		hypothetical protein	0.08726	50
776264	776968	+	704	CDS	Bphy_0689		hypothetical protein	0.209929	148
776952	777746	+	794	CDS	Bphy_0690		phospholipid/glycerol acyltransferase	0.0767296	61
777727	778026	+	299	CDS	Bphy_0691		putative acyl-carrier protein	0.12	36
778023	778280	+	257	CDS	Bphy_0692		acyl carrier protein	0.0736434	19
778280	778984	+	704	CDS	Bphy_0693		hypothetical protein	0.110638	78
778981	780669	+	1688	CDS	Bphy_0694		AMP-dependent synthetase and ligase	0.0651273	110
780666	782447	+	1781	CDS	Bphy_0695		glycosyl transferase family protein	0.047138	84
782434	784029	+	1595	CDS	Bphy_0696		histidine ammonia-lyase	0.0532581	85
784022	784453	+	431	CDS	Bphy_0697		thioesterase superfamily protein	0.099537	43
784441	785109	+	668	CDS	Bphy_0698		putative signal peptide protein	0.0358744	24
785106	787526	+	2420	CDS	Bphy_0699		RND superfamily drug exporter	0.0359356	87
787523	788704	+	1181	CDS	Bphy_0700		3-oxoacyl-(acyl carrier protein) synthase I	0.0482234	57
788739	789221	+	482	CDS	Bphy_0701		beta-hydroxyacyl-(acyl-carrier-protein) dehydratase FabA/FabZ	0.0559006	27
789218	789943	+	725	CDS	Bphy_0702		short chain dehydrogenase	0.0482094	35
789943	791169	+	1226	CDS	Bphy_0703		3-oxoacyl-(acyl carrier protein) synthase II	0.0676447	83
791166	792392	+	1226	CDS	Bphy_0704		beta-ketoacyl synthase	0.0374898	46
792436	792864	+	428	CDS	Bphy_0705		putative signal peptide protein	0.0629371	27
792892	793323	+	431	CDS	Bphy_0706		putative excinuclease ATPase subunit	0.0763889	33
793375	794127	-	752	CDS	Bphy_0707		type 11 methyltransferase	0.063745	48
794248	795498	+	1250	CDS	Bphy_0708		FAD-binding monooxygenase	0.0559552	70
795644	796969	-	1325	CDS	Bphy_0709		guanine deaminase	0.0490196	65
796999	798039	-	1040	CDS	Bphy_0710		adenosine deaminase	0.067243	70
798144	799154	-	1010	CDS	Bphy_0711		xanthine dehydrogenase accessory protein XdhC	0.0534125	54
799248	801704	-	2456	CDS	Bphy_0712		xanthine dehydrogenase, molybdopterin binding subunit	0.0529101	130
801704	803242	-	1538	CDS	Bphy_0713		xanthine dehydrogenase small subunit	0.0539311	83
803652	804158	-	506	CDS	Bphy_0714		disulfide bond formation protein B	0.0138067	7
804264	805652	-	1388	CDS	Bphy_0715		amidase	0.0511159	71
805878	807635	+	1757	CDS	Bphy_0716		sodium/hydrogen exchanger	0.0722412	127
807792	809231	+	1439	CDS	Bphy_0717		peptidase C26	0.0833333	120
809508	810251	+	743	CDS	Bphy_0718		putative exported lipoprotein	0.0497312	37
810381	811460	-	1079	CDS	Bphy_0719		hypothetical protein	0.0361111	39
811619	812185	-	566	CDS	Bphy_0720		GCN5-like N-acetyltransferase	0.0440917	25
812590	813891	+	1301	CDS	Bphy_0721		general substrate transporter	0.0660522	86
814002	815849	-	1847	CDS	Bphy_0722		TPR repeat-containing protein	0.0189394	35
815960	816340	+	380	CDS	Bphy_0723		ArsR family transcriptional regulator	0.0551181	21
816337	817458	+	1121	CDS	Bphy_0724		cation diffusion facilitator family transporter	0.0962567	108
817568	819283	+	1715	CDS	Bphy_0725		FAD-binding monooxygenase	0.0652681	112
819358	819612	-	254	CDS	Bphy_0726		NAD-dependent formate dehydrogenase subunit delta	0.0862745	22
819634	822573	-	2939	CDS	Bphy_0727		formate dehydrogenase subunit alpha	0.0789116	232
822588	824144	-	1556	CDS	Bphy_0728		NADH dehydrogenase (quinone)	0.116249	181
824141	824653	-	512	CDS	Bphy_0729		NAD-dependent formate dehydrogenase subunit gamma	0.101365	52
824788	825870	+	1082	CDS	Bphy_0730		molybdate metabolism transcriptional regulator	0.100646	109
826014	826280	+	266	CDS	Bphy_0731		hypothetical protein	0.0973783	26
826341	826700	-	359	CDS	Bphy_0732		hypothetical protein	0.102778	37
827086	828213	+	1127	CDS	Bphy_0733		group 1 glycosyl transferase	0.0824468	93
828242	828502	-	260	CDS	Bphy_0734		GP29	0.0651341	17
829187	829900	-	713	CDS	Bphy_0735		phosphoglycolate phosphatase	0.0882353	63
829938	830636	-	698	CDS	Bphy_0736		3-demethylubiquinone-9 3-methyltransferase	0.0386266	27
830843	831490	-	647	CDS	Bphy_0737		OmpA/MotB domain-containing protein	0.00771605	5
832056	834635	+	2579	CDS	Bphy_0738		DNA gyrase subunit A	0	0
834752	835360	+	608	CDS	Bphy_0739		hypothetical protein	0.0328407	20
835573	836655	+	1082	CDS	Bphy_0740		phosphoserine aminotransferase	0.00184672	2
836728	837810	+	1082	CDS	Bphy_0741		chorismate mutase	0.00184672	2
837889	839004	+	1115	CDS	Bphy_0742		histidinol-phosphate aminotransferase	0.0224014	25
839013	840017	+	1004	CDS	Bphy_0743		prephenate dehydrogenase	0	0
840037	841341	+	1304	CDS	Bphy_0744		3-phosphoshikimate 1-carboxyvinyltransferase	0.00229885	3
841390	842076	+	686	CDS	Bphy_0745		cmk ,cytidylate kinase	0	0
842190	843959	+	1769	CDS	Bphy_0746		rpsA ,30S ribosomal protein S1	0	0
843982	844305	+	323	CDS	Bphy_0747		ihfB ,integration host factor subunit beta	0.0216049	7
844637	844930	+	293	CDS	Bphy_0748		hypothetical protein	0.0714286	21
844987	846162	+	1175	CDS	Bphy_0749		tetratricopeptide repeat-containing protein	0.00340136	4
846253	847665	+	1412	CDS	Bphy_0750		nucleotide sugar dehydrogenase	0.0488323	69
847658	848620	+	962	CDS	Bphy_0751		rfaE bifunctional protein	0.00207684	2
848702	849694	+	992	CDS	Bphy_0752		ADP-L-glycero-D-manno-heptose-6-epimerase	0.00302115	3
849771	850139	+	368	CDS	Bphy_0753		hypothetical protein	0.0677507	25
850444	851346	+	902	CDS	Bphy_0754	cysM	cysteine synthase B	0.00664452	6
851438	852826	-	1388	CDS	Bphy_0755		lytic murein transglycosylase B	0.0849532	118
852859	853782	+	923	CDS	Bphy_0756		histone deacetylase superfamily protein	0.111472	103
853815	854624	+	809	CDS	Bphy_0757		enoyl-CoA hydratase	0.103704	84
854634	855581	-	947	CDS	Bphy_0758		alpha/beta hydrolase fold protein	0.0759494	72
855756	856790	+	1034	CDS	Bphy_0759		metN ,DL-methionine transporter ATP-binding subunit	0.138164	143
856780	857433	+	653	CDS	Bphy_0760		binding-protein-dependent transport systems inner membrane component	0.0948012	62
857462	858262	+	800	CDS	Bphy_0761		YaeC family lipoprotein	0.0811486	65
858506	859255	+	749	CDS	Bphy_0762		electron transfer flavoprotein alpha/beta-subunit	0.00533333	4
859283	860218	+	935	CDS	Bphy_0763		electron transfer flavoprotein subunit alpha	0	0
860321	862111	+	1790	CDS	Bphy_0764		acyl-CoA dehydrogenase domain-containing protein	0.127862	229
862184	863470	-	1286	CDS	Bphy_0765		D-amino acid dehydrogenase small subunit	0.0979021	126
863636	864124	+	488	CDS	Bphy_0766		AsnC family transcriptional regulator	0.112474	55
864229	865389	+	1160	CDS	Bphy_0767		radical SAM domain-containing protein	0.150732	175
865412	865945	-	533	CDS	Bphy_0768		hypothetical protein	0.20412	109
866299	866553	+	254	CDS	Bphy_0769		rpsP ,30S ribosomal protein S16	0	0
866650	867345	+	695	CDS	Bphy_0770		rimM ,16S rRNA-processing protein RimM	0	0
867370	868137	+	767	CDS	Bphy_0771		trmD ,tRNA (guanine-N(1)-)-methyltransferase	0.00130208	1
868282	868665	+	383	CDS	Bphy_0772		rplS ,50S ribosomal protein L19	0.015625	6
868759	869466	+	707	CDS	Bphy_0773		NUDIX hydrolase	0.110169	78
869630	870568	+	938	CDS	Bphy_0774		CobD/CbiB family protein	0.204473	192
870657	870944	-	287	CDS	Bphy_0775		hypothetical protein	0.0798611	23
870949	871902	-	953	CDS	Bphy_0776		ribosome-associated GTPase	0.00524109	5
871899	873158	-	1259	CDS	Bphy_0777		Ste24 endopeptidase	0.031746	40
873247	873870	+	623	CDS	Bphy_0778		oligoribonuclease	0.0288462	18
873874	874500	-	626	CDS	Bphy_0779		mogA ,molybdenum cofactor biosynthesis protein MogA	0.105263	66
874481	875062	-	581	CDS	Bphy_0780		hypothetical protein	0.128866	75
875311	876681	+	1370	CDS	Bphy_0781		peptidase U62 modulator of DNA gyrase	0.0904449	124
876873	877373	-	500	CDS	Bphy_0782		dihydrofolate reductase	0.113772	57
877513	879000	-	1487	CDS	Bphy_0783		sigma-54 dependent trancsriptional regulator	0.0907258	135
879025	879924	-	899	CDS	Bphy_0784		hypothetical protein	0.0655556	59
880032	881315	-	1283	CDS	Bphy_0785		peptidase C39 bacteriocin processing	0.0716511	92
881922	882398	-	476	CDS	Bphy_0786		hypothetical protein	0.113208	54
882947	884341	+	1394	CDS	Bphy_0787		sigma-54 dependent trancsriptional regulator	0.142652	199
884570	885541	+	971	CDS	Bphy_0788		thyA ,thymidylate synthase	0.00308642	3
885629	888175	-	2546	CDS	Bphy_0789		hypothetical protein	0.135846	346
888326	889042	-	716	CDS	Bphy_0790		ArsR family transcriptional regulator	0.11855	85
889228	889368	+	140	CDS	Bphy_0791		hypothetical protein	0.184397	26
889502	890761	+	1259	CDS	Bphy_0792		major facilitator transporter	0.12381	156
890793	891884	+	1091	CDS	Bphy_0793		AraC family transcriptional regulator	0.0686813	75
891968	892474	+	506	CDS	Bphy_0794		thioesterase superfamily protein	0.114398	58
892538	893938	-	1400	CDS	Bphy_0795		fumC ,fumarate hydratase	0.137045	192
894026	895714	-	1688	CDS	Bphy_0796		phospholipase D/transphosphatidylase	0.133215	225
896124	897515	-	1391	CDS	Bphy_0797		MATE efflux family protein	0.135057	188
897726	897944	-	218	CDS	Bphy_0798		hypothetical protein	0.0821918	18
898268	898720	+	452	CDS	Bphy_0799		putative signal peptide protein	0.242826	110
898786	899052	+	266	CDS	Bphy_0800		hypothetical protein	0.093633	25
899172	901424	+	2252	CDS	Bphy_0801		UvrD/REP helicase	0.11984	270
901485	902252	-	767	CDS	Bphy_0802		hypothetical protein	0.0859375	66
902482	902805	-	323	CDS	Bphy_0803		branched-chain amino acid transport	0.108025	35
902802	903569	-	767	CDS	Bphy_0804		AzlC family protein	0.127604	98
903682	904509	-	827	CDS	Bphy_0805		AraC family transcriptional regulator	0.10628	88
904552	905055	-	503	CDS	Bphy_0806		CreA family protein	0.0595238	30
905529	905852	-	323	CDS	Bphy_0807		4Fe-4S ferredoxin iron-sulfur binding domain-containing protein	0.0154321	5
906133	907332	+	1199	CDS	Bphy_0808		nicotinate phosphoribosyltransferase	0.0966667	116
907542	908204	+	662	CDS	Bphy_0809		hypothetical protein	0.119155	79
908215	909675	+	1460	CDS	Bphy_0810		citrate transporter	0.103354	151
909730	910719	+	989	CDS	Bphy_0811		D-isomer specific 2-hydroxyacid dehydrogenase	0.0959596	95
910716	912200	+	1484	CDS	Bphy_0812		hypothetical protein	0.0572391	85
912275	912763	-	488	CDS	Bphy_0813		GCN5-like N-acetyltransferase	0.0838446	41
912763	913047	-	284	CDS	Bphy_0814		hypothetical protein	0.101754	29
913101	914396	-	1295	CDS	Bphy_0815		molybdenum cofactor synthesis domain-containing protein	0.0887346	115
914478	915092	-	614	CDS	Bphy_0816		mobA ,molybdopterin-guanine dinucleotide biosynthesis protein MobA	0.0943089	58
915108	916220	-	1112	CDS	Bphy_0817		moaA ,molybdenum cofactor biosynthesis protein A	0.10602	118
916407	919685	-	3278	CDS	Bphy_0818		ribonuclease	0.0128088	42
920449	921510	+	1061	CDS	Bphy_0819		RluA family pseudouridine synthase	0.167608	178
921491	922150	+	659	CDS	Bphy_0820		HAD family hydrolase	0.160606	106
922147	922539	+	392	CDS	Bphy_0821		Rieske (2Fe-2S) domain-containing protein	0.180662	71
922585	923595	+	1010	CDS	Bphy_0822		peptidase S49	0.145401	147
923652	924371	-	719	CDS	Bphy_0823		uroporphyrin-III C/tetrapyrrole methyltransferase	0.177778	128
924368	924988	-	620	CDS	Bphy_0824		Maf-like protein	0.164251	102
925228	925866	+	638	CDS	Bphy_0825		hypothetical protein	0.029734	19
925980	926159	+	179	CDS	Bphy_0826		50S ribosomal protein L32	0.0111111	2
926296	927426	+	1130	CDS	Bphy_0827		putative glycerol-3-phosphate acyltransferase PlsX	0.000884173	1
927426	928415	+	989	CDS	Bphy_0828		3-oxoacyl-(acyl carrier protein) synthase III	0.0010101	1
928509	929441	+	932	CDS	Bphy_0829		malonyl CoA-acyl carrier protein transacylase	0.00321543	3
929507	930256	+	749	CDS	Bphy_0830		fabG ,3-ketoacyl-(acyl-carrier-protein) reductase	0.00266667	2
930404	930643	+	239	CDS	Bphy_0831	acpP	acpP ,acyl carrier protein	0	0
930949	932235	+	1286	CDS	Bphy_0832		3-oxoacyl-(acyl carrier protein) synthase II	0.001554	2
932348	932731	+	383	CDS	Bphy_0833		hypothetical protein	0.169271	65
932864	933463	+	599	CDS	Bphy_0834		RNA polymerase sigma factor RpoE	0.0216667	13
933548	934201	+	653	CDS	Bphy_0835	rseA	anti sigma-E protein, RseA	0.0642202	42
934206	935246	+	1040	CDS	Bphy_0836		sigma E regulatory protein, MucB/RseB	0.0518732	54
935266	936774	+	1508	CDS	Bphy_0837		protease Do	0.0735586	111
936771	937049	+	278	CDS	Bphy_0838		glutaredoxin 2	0.146953	41
937214	939007	+	1793	CDS	Bphy_0839		GTP-binding protein LepA	0.0412486	74
939028	939921	+	893	CDS	Bphy_0840		signal peptidase I	0.00559284	5
940073	941398	+	1325	CDS	Bphy_0841		ribonuclease III	0.00829563	11
941499	942362	+	863	CDS	Bphy_0842	era	GTP-binding protein Era	0.00231481	2
942349	943359	+	1010	CDS	Bphy_0843		recO ,DNA repair protein RecO	0.0464886	47
943356	944120	+	764	CDS	Bphy_0844		pyridoxine 5'-phosphate synthase	0.00522876	4
944144	944551	+	407	CDS	Bphy_0845	acpS	acpS ,4'-phosphopantetheinyl transferase	0.0196078	8
944619	945650	+	1031	CDS	Bphy_0846		beta-hexosaminidase	0.0687984	71
945728	947110	-	1382	CDS	Bphy_0847		two component, sigma54 specific, Fis family transcriptional regulator	0.0585683	81
947234	947440	-	206	CDS	Bphy_0848		CsbD family protein	0.0772947	16
947743	948300	-	557	CDS	Bphy_0849		elongation factor P	0.00716846	4
948629	949810	-	1181	CDS	Bphy_0850		hypothetical protein	0.00423012	5
949920	952142	+	2222	CDS	Bphy_0851		uvrC ,excinuclease ABC subunit C	0.0814215	181
952283	952873	+	590	CDS	Bphy_0852		CDP-diacylglycerol--glycerol-3-phosphate 3-phosphatidyltransferase	0.00676819	4
952978	953121	-	143	CDS	Bphy_0853		hypothetical protein	0	0
953535	954035	+	500	CDS	Bphy_0854		GCN5-like N-acetyltransferase	0.107784	54
954048	954938	-	890	CDS	Bphy_0855		putative inner membrane protein	0.13468	120
954991	955470	-	479	CDS	Bphy_0856		hypothetical protein	0.154167	74
955488	956114	-	626	CDS	Bphy_0857		electron transport protein SCO1/SenC	0.124402	78
956492	957241	+	749	CDS	Bphy_0858		HAD family hydrolase	0.00533333	4
957294	958730	+	1436	CDS	Bphy_0859		alpha,alpha-trehalose-phosphate synthase	0.091858	132
958821	960713	-	1892	CDS	Bphy_0860		ABC transporter-like protein	0.0882198	167
961392	962456	+	1064	CDS	Bphy_0861		group 1 glycosyl transferase	0.11831	126
962695	963552	+	857	CDS	Bphy_0862		hypothetical protein	0.0641026	55
963631	964089	+	458	CDS	Bphy_0863		hypothetical protein	0.08061	37
964140	966008	-	1868	CDS	Bphy_0864		hypothetical protein	0.094168	176
966005	966394	-	389	CDS	Bphy_0865		GtrA family protein	0.0615385	24
966391	967374	-	983	CDS	Bphy_0866		glycosyl transferase family protein	0.0924797	91
967768	968517	-	749	CDS	Bphy_0867		DNA polymerase III subunit epsilon	0.008	6
968586	969032	-	446	CDS	Bphy_0868		ribonuclease H	0.0134228	6
969029	969844	-	815	CDS	Bphy_0869		type 11 methyltransferase	0.0269608	22
969864	970667	+	803	CDS	Bphy_0870		hydroxyacylglutathione hydrolase	0.135572	109
970823	972508	+	1685	CDS	Bphy_0871		lytic transglycosylase	0.0818505	138
972757	974001	+	1244	CDS	Bphy_0872		major facilitator transporter	0.128514	160
974454	975608	+	1154	CDS	Bphy_0873		carbamoyl phosphate synthase small subunit	0	0
975730	978984	+	3254	CDS	Bphy_0874	carB	carbamoyl phosphate synthase large subunit	0.000921659	3
979137	979613	+	476	CDS	Bphy_0875		greA ,transcription elongation factor GreA	0.0440252	21
979633	980133	+	500	CDS	Bphy_0876		hypothetical protein	0.11976	60
980288	980851	-	563	CDS	Bphy_0877		hypothetical protein	0.0886525	50
981120	981782	+	662	CDS	Bphy_0878		ribosomal RNA methyltransferase RrmJ/FtsJ	0.0120664	8
981969	983858	+	1889	CDS	Bphy_0879		ATP-dependent metalloprotease FtsH	0.000529101	1
984031	984873	+	842	CDS	Bphy_0880		dihydropteroate synthase	0.00118624	1
984902	986260	+	1358	CDS	Bphy_0881		glmM ,phosphoglucosamine mutase	0.00220751	3
986616	987647	+	1031	CDS	Bphy_0882		phosphate ABC transporter periplasmic phosphate-binding protein	0.100775	104
987797	988795	+	998	CDS	Bphy_0883		pstC ,phosphate transporter permease subunit PstC	0.0780781	78
988792	989688	+	896	CDS	Bphy_0884		pstA ,phosphate transporter permease subunit PtsA	0.0758082	68
989704	990552	+	848	CDS	Bphy_0885		pstB ,phosphate transporter ATP-binding protein	0.0871614	74
990587	991291	+	704	CDS	Bphy_0886		phosphate uptake regulator PhoU	0.0624113	44
991355	992056	+	701	CDS	Bphy_0887		two component transcriptional regulator	0.0911681	64
992153	993466	+	1313	CDS	Bphy_0888		multi-sensor signal transduction histidine kinase	0.0996956	131
993642	995249	-	1607	CDS	Bphy_0889		Ppx/GppA phosphatase	0.0970149	156
995430	997493	+	2063	CDS	Bphy_0890		polyphosphate kinase	0.0809109	167
997972	998787	-	815	CDS	Bphy_0891		hypothetical protein	0.0845588	69
998964	999422	-	458	CDS	Bphy_0892		putative phosphohistidine phosphatase SixA	0.0980392	45
999831	999989	-	158	CDS	Bphy_0893		hypothetical protein	0.100629	16
1000332	1000505	-	173	CDS	Bphy_0894		hypothetical protein	0.206897	36
1000673	1000846	+	173	CDS	Bphy_0895		lipoprotein	0.109195	19
1000872	1002254	-	1382	CDS	Bphy_0896		MATE efflux family protein	0.088214	122
1002251	1002604	-	353	CDS	Bphy_0897		hypothetical protein	0.124294	44
1003216	1003545	-	329	CDS	Bphy_0898		lipoprotein	0.0939394	31
1003734	1004456	-	722	CDS	Bphy_0899		peptidase M23B	0.0940526	68
1004573	1005490	-	917	CDS	Bphy_0900		aldose 1-epimerase	0.100218	92
1005530	1005787	+	257	CDS	Bphy_0901		hypothetical protein	0.189922	49
1006000	1006893	+	893	CDS	Bphy_0902		undecaprenyl pyrophosphate phosphatase	0.0928412	83
1007365	1007610	-	245	CDS	Bphy_0903		hypothetical protein	0.121951	30
1007901	1008290	+	389	CDS	Bphy_0904		hypothetical protein	0.0641026	25
1008287	1008745	+	458	CDS	Bphy_0905		NUDIX hydrolase	0.108932	50
1008771	1009685	-	914	CDS	Bphy_0906		extracellular solute-binding protein	0.125683	115
1009819	1011540	-	1721	CDS	Bphy_0907		glutaminyl-tRNA synthetase	0.00058072	1
1011596	1011949	-	353	CDS	Bphy_0908		hypothetical protein	0.110169	39
1012106	1012933	+	827	CDS	Bphy_0909		RNA polymerase sigma factor	0.176329	146
1012923	1013891	+	968	CDS	Bphy_0910		putative transmembrane anti-sigma factor	0.0557276	54
1014115	1014489	+	374	CDS	Bphy_0911		rpsF ,30S ribosomal protein S6	0	0
1014555	1014854	+	299	CDS	Bphy_0912		putative primosomal replication protein N	0	0
1014857	1015132	+	275	CDS	Bphy_0913		rpsR ,30S ribosomal protein S18	0.00724638	2
1015160	1015612	+	452	CDS	Bphy_0914		rplI ,50S ribosomal protein L9	0.0463576	21
1015784	1017172	+	1388	CDS	Bphy_0915		replicative DNA helicase	0.00287977	4
1017321	1017947	+	626	CDS	Bphy_0916		hypothetical protein	0.127592	80
1017947	1018957	+	1010	CDS	Bphy_0917		phosphate transporter	0.0929773	94
1018980	1019786	-	806	CDS	Bphy_0918		short-chain dehydrogenase/reductase SDR	0.137546	111
1019928	1021076	-	1148	CDS	Bphy_0919		NLP/P60 protein	0.0922541	106
1021327	1023147	-	1820	CDS	Bphy_0920		PhoH family protein	0.12905	235
1023513	1023974	-	461	CDS	Bphy_0921		alkyl hydroperoxide reductase/ Thiol specific antioxidant/ Mal allergen	0.123377	57
1024201	1025097	-	896	CDS	Bphy_0922		polysaccharide deacetylase	0.00557414	5
1025110	1026156	-	1046	CDS	Bphy_0923		NAD-dependent epimerase/dehydratase family protein	0	0
1026153	1027088	-	935	CDS	Bphy_0924		putative formyltransferase	0	0
1027085	1028134	-	1049	CDS	Bphy_0925		glycosyl transferase family protein	0.00571429	6
1028153	1029304	-	1151	CDS	Bphy_0926		DegT/DnrJ/EryC1/StrS aminotransferase	0.00173611	2
1029561	1029986	-	425	CDS	Bphy_0927		hypothetical protein	0.0469484	20
1029961	1031763	-	1802	CDS	Bphy_0928		glycosyl transferase family protein	0.00110926	2
1032158	1032562	-	404	CDS	Bphy_0929		hypothetical protein	0.091358	37
1033030	1034277	+	1247	CDS	Bphy_0930		aminotransferase AlaT	0.036859	46
1034336	1035667	+	1331	CDS	Bphy_0931		homoserine dehydrogenase	0	0
1035698	1037146	+	1448	CDS	Bphy_0932		threonine synthase	0.00138026	2
1037419	1038714	+	1295	CDS	Bphy_0933		molybdenum cofactor synthesis domain-containing protein	0.118056	153
1038778	1039035	+	257	CDS	Bphy_0934		molybdopterin converting factor subunit 1	0.135659	35
1039068	1039544	+	476	CDS	Bphy_0935		molybdopterin biosynthesis MoaE protein	0.138365	66
1039653	1040210	-	557	CDS	Bphy_0936		globin	0.267025	149
1040418	1040945	+	527	CDS	Bphy_0937	trmB	transcriptional regulator, TrmB	0.126894	67
1041221	1043818	+	2597	CDS	Bphy_0938		ATP-dependent chaperone ClpB	0.118168	307
1043959	1044402	-	443	CDS	Bphy_0939		hypothetical protein	0.0675676	30
1044534	1045094	-	560	CDS	Bphy_0940		putative DNA uptake protein, ComEA-like protein	0.0713012	40
1045320	1047677	-	2357	CDS	Bphy_0941		penicillin-binding protein 1C	0.0661578	156
1047692	1053754	-	6062	CDS	Bphy_0942		alpha-2-macroglobulin domain-containing protein	0.0724064	439
1053918	1054334	+	416	CDS	Bphy_0943		MerR family transcriptional regulator	0.0647482	27
1054331	1054729	+	398	CDS	Bphy_0944		carboxymuconolactone decarboxylase	0.110276	44
1055014	1056375	-	1361	CDS	Bphy_0945		MATE efflux family protein	0.0800294	109
1056378	1058135	-	1757	CDS	Bphy_0946		putative inner membrane protein	0.00113766	2
1058410	1058673	-	263	CDS	Bphy_0947		rpmE2 ,50S ribosomal protein L31 type B	0.0227273	6
1058844	1059686	-	842	CDS	Bphy_0948		hypothetical protein	0.134045	113
1059870	1061132	-	1262	CDS	Bphy_0949		rho ,transcription termination factor Rho	0.00158353	2
1061421	1061747	-	326	CDS	Bphy_0950		thioredoxin	0.00917431	3
1062461	1064842	+	2381	CDS	Bphy_0951		DNA polymerase III subunits gamma and tau	0	0
1064920	1065246	+	326	CDS	Bphy_0952		hypothetical protein	0.103976	34
1065380	1065976	+	596	CDS	Bphy_0953		recR ,recombination protein RecR	0.102178	61
1066040	1067305	+	1265	CDS	Bphy_0954		L-carnitine dehydratase/bile acid-inducible protein F	0.101106	128
1067389	1068426	+	1037	CDS	Bphy_0955		NMT1/THI5-like domain-containing protein	0.0645472	67
1068473	1069297	+	824	CDS	Bphy_0956		ABC transporter-like protein	0.124848	103
1069299	1070123	+	824	CDS	Bphy_0957		binding-protein-dependent transport systems inner membrane component	0.113939	94
1070205	1071179	-	974	CDS	Bphy_0958		alcohol dehydrogenase	0.0902564	88
1071447	1072205	+	758	CDS	Bphy_0959		surE ,stationary phase survival protein SurE	0.0434783	33
1072202	1073185	+	983	CDS	Bphy_0960		protein-L-isoaspartate O-methyltransferase	0.0416667	41
1073191	1074129	+	938	CDS	Bphy_0961		peptidase M23B	0	0
1074146	1075240	+	1094	CDS	Bphy_0962		RNA polymerase sigma factor RpoS	0.0347032	38
1075247	1076023	+	776	CDS	Bphy_0963		3'-5' exonuclease	0.00900901	7
1076162	1077025	-	863	CDS	Bphy_0964		endonuclease/exonuclease/phosphatase	0.0775463	67
1077109	1078530	+	1421	CDS	Bphy_0965		rumA ,23S rRNA 5-methyluridine methyltransferase	0.11744	167
1078642	1079499	-	857	CDS	Bphy_0966		putative competence lipoprotein, ComL	0.00699301	6
1079539	1080849	+	1310	CDS	Bphy_0967		RluA family pseudouridine synthase	0.0686499	90
1080846	1081685	+	839	CDS	Bphy_0968		hypothetical protein	0.0297619	25
1082120	1084108	+	1988	CDS	Bphy_0969		poly(R)-hydroxyalkanoic acid synthase, class I	0.10357	206
1084301	1085482	+	1181	CDS	Bphy_0970		acetyl-CoA acetyltransferase	0.146362	173
1085656	1086396	+	740	CDS	Bphy_0971		acetyacetyl-CoA reductase	0.0620783	46
1086545	1087123	+	578	CDS	Bphy_0972		polyhydroxyalkonate synthesis repressor PhaR	0.120898	70
1087506	1088897	+	1391	CDS	Bphy_0973		rimO ,30S ribosomal protein S12 methylthiotransferase	0.0201149	28
1088902	1089840	+	938	CDS	Bphy_0974		ribokinase-like domain-containing protein	0.0596379	56
1090012	1091196	+	1184	CDS	Bphy_0975		beta-ketothiolase	0.111392	132
1091352	1091960	+	608	CDS	Bphy_0976		hypothetical protein	0.0837438	51
1092001	1093185	+	1184	CDS	Bphy_0977		cystathionine beta-lyase	0.0607595	72
1093273	1094112	-	839	CDS	Bphy_0978		phosphoserine phosphatase SerB	0.00357143	3
1094296	1095519	+	1223	CDS	Bphy_0979		cytochrome P450	0.0743464	91
1095703	1096677	+	974	CDS	Bphy_0980		Ku protein	0.0953846	93
1096745	1099609	+	2864	CDS	Bphy_0981		DNA ligase D	0.0973822	279
1099684	1099998	+	314	CDS	Bphy_0982		hypothetical protein	0.0888889	28
1100016	1100990	-	974	CDS	Bphy_0983		LysR family transcriptional regulator	0.0574359	56
1101155	1102171	+	1016	CDS	Bphy_0984		zinc-binding alcohol dehydrogenase family protein	0.164208	167
1102369	1102929	+	560	CDS	Bphy_0985		hypothetical protein	0.0962567	54
1103016	1103822	-	806	CDS	Bphy_0986		hypothetical protein	0.135068	109
1103819	1104559	-	740	CDS	Bphy_0987		ABC transporter-like protein	0.074224	55
1104678	1107110	+	2432	CDS	Bphy_0988		AsmA family protein	0.0916564	223
1107250	1107747	-	497	CDS	Bphy_0989		hypothetical protein	0.176707	88
1108222	1109865	+	1643	CDS	Bphy_0990		integral membrane sensor signal transduction histidine kinase	0.0742092	122
1110039	1110527	+	488	CDS	Bphy_0991		response regulator receiver protein	0.116564	57
1110609	1112600	+	1991	CDS	Bphy_0992		PAS/PAC sensor hybrid histidine kinase	0.0808233	161
1112708	1113157	-	449	CDS	Bphy_0993		mscL ,large-conductance mechanosensitive channel	0.0311111	14
1113346	1114368	-	1022	CDS	Bphy_0994		pyridoxal-5'-phosphate-dependent protein subunit beta	0.110459	113
1114435	1115694	-	1259	CDS	Bphy_0995		acetylornithine deacetylase	0.123016	155
1115827	1117005	-	1178	CDS	Bphy_0996		peptidase dimerisation domain-containing protein	0.0729432	86
1117010	1120504	-	3494	CDS	Bphy_0997		transcription-repair coupling factor	0.0821173	287
1120787	1121497	+	710	CDS	Bphy_0998		ispD ,2-C-methyl-D-erythritol 4-phosphate cytidylyltransferase	0.00421941	3
1121567	1122046	+	479	CDS	Bphy_0999		ispF ,2-C-methyl-D-erythritol 2,4-cyclodiphosphate synthase	0.0104167	5
1122137	1122661	-	524	CDS	Bphy_1000		alkylhydroperoxidase	0.0857143	45
1122737	1123285	-	548	CDS	Bphy_1001		alkyl hydroperoxide reductase/ Thiol specific antioxidant/ Mal allergen	0.125683	69
1123538	1124887	-	1349	CDS	Bphy_1002		integral membrane sensor signal transduction histidine kinase	0.114815	155
1124931	1125665	-	734	CDS	Bphy_1003		ompR ,osmolarity response regulator	0.183673	135
1125895	1126230	+	335	CDS	Bphy_1004		hypothetical protein	0.0922619	31
1126329	1127495	+	1166	CDS	Bphy_1005		hypothetical protein	0.102828	120
1127503	1128411	-	908	CDS	Bphy_1006		squalene/phytoene synthase	0.0517052	47
1129337	1129594	-	257	CDS	Bphy_1007		hypothetical protein	0.0891473	23
1129979	1130434	-	455	CDS	Bphy_1008		MarR family transcriptional regulator	0.186404	85
1130498	1131643	-	1145	CDS	Bphy_1009		glycerate kinase	0.143106	164
1132151	1133497	+	1346	CDS	Bphy_1010		tig ,trigger factor	0.0512249	69
1133680	1134339	+	659	CDS	Bphy_1011	clpP	clpP ,ATP-dependent Clp protease proteolytic subunit	0.0030303	2
1134547	1135818	+	1271	CDS	Bphy_1012	clpX	clpX ,ATP-dependent protease ATP-binding subunit ClpX	0.0298742	38
1136002	1138419	+	2417	CDS	Bphy_1013		ATP-dependent protease La	0.00744417	18
1138780	1139052	+	272	CDS	Bphy_1014		histone family protein DNA-binding protein	0.0915751	25
1139409	1141337	+	1928	CDS	Bphy_1015		PpiC-type peptidyl-prolyl cis-trans isomerase	0.032141	62
1141451	1141792	-	341	CDS	Bphy_1016		hypothetical protein	0.0906433	31
1141937	1142581	-	644	CDS	Bphy_1017		lysophospholipase	0.096124	62
1142673	1143359	+	686	CDS	Bphy_1018		ABC transporter-like protein	0.129549	89
1143453	1145075	-	1622	CDS	Bphy_1019		pgi ,glucose-6-phosphate isomerase	0.00123229	2
1145342	1146934	-	1592	CDS	Bphy_1020		carbohydrate kinase	0.0740741	118
1147046	1148347	-	1301	CDS	Bphy_1021		D-amino-acid dehydrogenase	0.192012	250
1148831	1152910	+	4079	CDS	Bphy_1022		phosphoribosylformylglycinamidine synthase	0.000245098	1
1153203	1153982	-	779	CDS	Bphy_1023		PpiC-type peptidyl-prolyl cis-trans isomerase	0.0820513	64
1153993	1154307	-	314	CDS	Bphy_1024		BolA family protein	0.0253968	8
1154309	1154839	-	530	CDS	Bphy_1025		intracellular septation protein A	0.00753296	4
1155076	1156593	-	1517	CDS	Bphy_1026		hypothetical protein	0.111989	170
1156782	1158464	+	1682	CDS	Bphy_1027		long-chain-fatty-acid--CoA ligase	0.087344	147
1158642	1160726	+	2084	CDS	Bphy_1028		3-hydroxyacyl-CoA dehydrogenase	0.0810552	169
1160748	1161374	+	626	CDS	Bphy_1029		nicotinamidase	0.0685805	43
1161473	1162651	+	1178	CDS	Bphy_1030		acetyl-CoA acetyltransferase	0.0703986	83
1162731	1162949	-	218	CDS	Bphy_1031		hypothetical protein	0.0273973	6
1163098	1163877	+	779	CDS	Bphy_1032		SH3 type 3 domain-containing protein	0.142308	111
1163925	1164416	-	491	CDS	Bphy_1033		water stress/hypersensitive response domain-containing protein	0.0873984	43
1164573	1165196	+	623	CDS	Bphy_1034		hypothetical protein	0.0592949	37
1165245	1165538	-	293	CDS	Bphy_1035		GYD family protein	0.0816327	24
1165986	1166459	+	473	CDS	Bphy_1036		thioesterase superfamily protein	0.0548523	26
1166520	1167518	+	998	CDS	Bphy_1037		alcohol dehydrogenase	0.0840841	84
1167566	1168435	+	869	CDS	Bphy_1038		hypothetical protein	0.106897	93
1168521	1169480	+	959	CDS	Bphy_1039		alpha/beta hydrolase domain-containing protein	0.0635417	61
1169504	1170325	-	821	CDS	Bphy_1040		hypothetical protein	0.0815085	67
1170425	1171474	-	1049	CDS	Bphy_1041		putative glycine cleavage T protein (aminomethyltransferase)	0.0104762	11
1171552	1172562	+	1010	CDS	Bphy_1042		aminodeoxychorismate lyase	0.0751731	76
1172562	1173182	+	620	CDS	Bphy_1043		tmk ,thymidylate kinase	0.0112721	7
1173278	1174327	+	1049	CDS	Bphy_1044		DNA polymerase III subunit delta'	0.00666667	7
1174381	1175172	+	791	CDS	Bphy_1045		TatD family hydrolase	0.0896465	71
1175224	1175997	+	773	CDS	Bphy_1046		ankyrin	0.0865633	67
1176115	1176471	+	356	CDS	Bphy_1047		hypothetical protein	0.0952381	34
1176723	1178162	+	1439	CDS	Bphy_1048		alpha,alpha-trehalose-phosphate synthase	0.123611	178
1178188	1178442	+	254	CDS	Bphy_1049		hypothetical protein	0.0352941	9
1178682	1179752	+	1070	CDS	Bphy_1050		group 1 glycosyl transferase	0.109244	117
1179991	1180578	-	587	CDS	Bphy_1051		putative lipoprotein	0.132653	78
1180975	1181421	-	446	CDS	Bphy_1052		putative transmembrane protein	0.127517	57
1181730	1182026	-	296	CDS	Bphy_1053		PsiF repeat-containing protein	0.0740741	22
1182314	1182610	+	296	CDS	Bphy_1054		YciI-like protein	0.151515	45
1183125	1184441	+	1316	CDS	Bphy_1055		putative transposase A-like protein	0.0858011	113
1184705	1186222	-	1517	CDS	Bphy_1056		mannose-1-phosphate guanylyltransferase/mannose-6-phosphate isomerase	0.0915679	139
1186810	1188207	+	1397	CDS	Bphy_1057		undecaprenyl-phosphate glucose phosphotransferase	0.0858369	120
1188289	1189719	+	1430	CDS	Bphy_1058		nucleotide sugar dehydrogenase	0.0957372	137
1189757	1190218	+	461	CDS	Bphy_1059		protein tyrosine phosphatase	0.0627706	29
1190212	1191393	+	1181	CDS	Bphy_1060		polysaccharide export protein	0.0549915	65
1191585	1193777	+	2192	CDS	Bphy_1061		exopolysaccharide tyrosine-protein kinase	0.0642955	141
1193843	1194799	+	956	CDS	Bphy_1062		glycosyl transferase family protein	0.0386625	37
1194796	1195968	+	1172	CDS	Bphy_1063		putative glycosyltransferase group 1, RfaG-like protein	0.0392157	46
1195972	1197432	+	1460	CDS	Bphy_1064		putative transmembrane protein	0.072553	106
1197433	1198668	+	1235	CDS	Bphy_1065		group 1 glycosyl transferase	0.0954693	118
1198720	1199877	+	1157	CDS	Bphy_1066		group 1 glycosyl transferase	0.0483592	56
1200203	1200463	+	260	CDS	Bphy_1067		XRE family transcriptional regulator	0.0804598	21
1200463	1201824	+	1361	CDS	Bphy_1068		HipA domain-containing protein	0.0947137	129
1201886	1202929	-	1043	CDS	Bphy_1069		GDP-mannose 4,6-dehydratase	0.117816	123
1202926	1203705	-	779	CDS	Bphy_1070		GDSL family lipase	0.0858974	67
1203717	1204817	-	1100	CDS	Bphy_1071		acyltransferase 3	0.0999092	110
1205294	1207579	+	2285	CDS	Bphy_1072		hypothetical protein	0.0682415	156
1207599	1209077	+	1478	CDS	Bphy_1073		polysaccharide biosynthesis protein	0.0547667	81
1209074	1211560	+	2486	CDS	Bphy_1074		group 1 glycosyl transferase	0.0667471	166
1211640	1212830	-	1190	CDS	Bphy_1075		acyltransferase 3	0.11419	136
1213088	1213234	+	146	CDS	Bphy_1076		hypothetical protein	0.129252	19
1213480	1214382	+	902	CDS	Bphy_1077		UTP-glucose-1-phosphate uridylyltransferase	0.108527	98
1214459	1215127	-	668	CDS	Bphy_1078		phosphoribosyltransferase	0.0508221	34
1215161	1215931	-	770	CDS	Bphy_1079		IclR family transcriptional regulator	0.127108	98
1216318	1217163	+	845	CDS	Bphy_1080		hypothetical protein	0.0933806	79
1217200	1219086	+	1886	CDS	Bphy_1081		4-hydroxyphenylpyruvate dioxygenase	0.0990991	187
1219304	1220521	+	1217	CDS	Bphy_1082		porin	0.103448	126
1220856	1221512	+	656	CDS	Bphy_1083		ProQ activator of osmoprotectant transporter ProP	0.101979	67
1221727	1223211	+	1484	CDS	Bphy_1084		integrase catalytic subunit	0.173737	258
1223482	1224726	-	1244	CDS	Bphy_1085		hypothetical protein	0.142972	178
1224958	1225560	-	602	CDS	Bphy_1086		hypothetical protein	0.268657	162
1226266	1227153	-	887	CDS	Bphy_1087		hypothetical protein	0.143018	127
1227658	1228515	+	857	CDS	Bphy_1088		hypothetical protein	0.134033	115
1228794	1230275	+	1481	CDS	Bphy_1089		arginine/ornithine antiporter	0.109987	163
1230289	1231548	+	1259	CDS	Bphy_1090		arginine deiminase	0.0793651	100
1231662	1232675	-	1013	CDS	Bphy_1091		hypothetical protein	0.0907298	92
1233043	1234524	-	1481	CDS	Bphy_1092		PAS/PAC sensor signal transduction histidine kinase	0.110661	164
1234622	1234885	-	263	CDS	Bphy_1093		hypothetical protein	0.166667	44
1235005	1235697	-	692	CDS	Bphy_1094		signal-transduction protein	0.15873	110
1236267	1237094	+	827	CDS	Bphy_1095		hypothetical protein	0.113527	94
1237292	1237558	+	266	CDS	Bphy_1096		hypothetical protein	0.093633	25
1237691	1240363	+	2672	CDS	Bphy_1097		magnesium-translocating P-type ATPase	0.127572	341
1240373	1241377	-	1004	CDS	Bphy_1098		1-phosphofructokinase	0.0696517	70
1241387	1243831	-	2444	CDS	Bphy_1099		phosphoenolpyruvate synthase	0.0417178	102
1243874	1244344	-	470	CDS	Bphy_1100		hypothetical protein	0.0573248	27
1244399	1245049	-	650	CDS	Bphy_1101		transport-associated	0.0322581	21
1245275	1246234	+	959	CDS	Bphy_1102		UspA domain-containing protein	0.084375	81
1246429	1248897	-	2468	CDS	Bphy_1103		HAD superfamily P-type ATPase	0.0396922	98
1248884	1249375	-	491	CDS	Bphy_1104		putative signal peptide exported protein	0.0792683	39
1249721	1251085	+	1364	CDS	Bphy_1105		beta-lactamase domain-containing protein	0.0703297	96
1251132	1252988	-	1856	CDS	Bphy_1106		poly-beta-hydroxybutyrate polymerase domain-containing protein	0.0468498	87
1253088	1253327	-	239	CDS	Bphy_1107		hypothetical protein	0.0458333	11
1253390	1254040	-	650	CDS	Bphy_1108		transport-associated	0.0614439	40
1254262	1255011	+	749	CDS	Bphy_1109		hypothetical protein	0.04	30
1255236	1255673	-	437	CDS	Bphy_1110		heat shock protein Hsp20	0.0913242	40
1255794	1256474	-	680	CDS	Bphy_1111		transport-associated	0.0763583	52
1256664	1258625	-	1961	CDS	Bphy_1112		ATP-dependent metalloprotease FtsH	0.0509684	100
1258806	1260428	+	1622	CDS	Bphy_1113		chaperonin GroEL	0.0443623	72
1260671	1261966	+	1295	CDS	Bphy_1114		polyhydroxyalkanoate depolymerase, intracellular	0.0609568	79
1261963	1263702	+	1739	CDS	Bphy_1115		hypothetical protein	0.0408046	71
1263641	1263916	-	275	CDS	Bphy_1116		hypothetical protein	0.0434783	12
1264221	1264691	-	470	CDS	Bphy_1117		UspA domain-containing protein	0.059448	28
1264941	1265396	+	455	CDS	Bphy_1118		hypothetical protein	0.0526316	24
1265410	1266249	-	839	CDS	Bphy_1119		Ion transport 2 domain-containing protein	0.0571429	48
1266429	1266677	-	248	CDS	Bphy_1120		hypothetical protein	0.060241	15
1267026	1267907	-	881	CDS	Bphy_1121		H+transporting two-sector ATPase subunit gamma	0.0668934	59
1267888	1269465	-	1577	CDS	Bphy_1122		ATP synthase F1 subunit alpha	0.0373891	59
1269452	1270195	-	743	CDS	Bphy_1123		H+transporting two-sector ATPase B/B' subunit	0.0510753	38
1270203	1270448	-	245	CDS	Bphy_1124		F0F1 ATP synthase subunit C	0.0569106	14
1270445	1271140	-	695	CDS	Bphy_1125		F0F1 ATP synthase subunit A	0.0617816	43
1271137	1271430	-	293	CDS	Bphy_1126		hypothetical protein	0.0136054	4
1271423	1271737	-	314	CDS	Bphy_1127		F0F1-ATPase subunit	0.0507937	16
1271734	1272165	-	431	CDS	Bphy_1128		F0F1 ATP synthase subunit epsilon	0.0347222	15
1272179	1273648	-	1469	CDS	Bphy_1129		F0F1 ATP synthase subunit beta	0.0578231	85
1273866	1274480	+	614	CDS	Bphy_1130		LemA family protein	0.0455285	28
1274718	1275464	-	746	CDS	Bphy_1131		acetoacetyl-CoA reductase	0.0414993	31
1275466	1275711	-	245	CDS	Bphy_1132		hypothetical protein	0.0528455	13
1275922	1276761	+	839	CDS	Bphy_1133		UspA domain-containing protein	0.0452381	38
1276778	1277281	+	503	CDS	Bphy_1134		UspA domain-containing protein	0.0376984	19
1277278	1278111	+	833	CDS	Bphy_1135		UspA domain-containing protein	0.0743405	62
1278294	1278740	-	446	CDS	Bphy_1136		UspA domain-containing protein	0.0760626	34
1279121	1279765	+	644	CDS	Bphy_1137		two component LuxR family transcriptional regulator	0.0790698	51
1279935	1280717	+	782	CDS	Bphy_1138		Crp/FNR family transcriptional regulator	0.0791826	62
1280885	1281916	+	1031	CDS	Bphy_1139		hypothetical protein	0.0445736	46
1281952	1282296	+	344	CDS	Bphy_1140		cytochrome c family protein	0.0550725	19
1282340	1282708	+	368	CDS	Bphy_1141		hypothetical protein	0.0758808	28
1282735	1283055	-	320	CDS	Bphy_1142		hypothetical protein	0.0498442	16
1283440	1284948	+	1508	CDS	Bphy_1143		PAS/PAC sensor signal transduction histidine kinase	0.0808482	122
1284958	1285410	+	452	CDS	Bphy_1144		response regulator receiver protein	0.165563	75
1285407	1286879	+	1472	CDS	Bphy_1145		multi-sensor signal transduction histidine kinase	0.143245	211
1287091	1287567	+	476	CDS	Bphy_1146		CreA family protein	0.081761	39
1287610	1287900	-	290	CDS	Bphy_1147		hypothetical protein	0.109966	32
1288145	1288939	-	794	CDS	Bphy_1148		ABC transporter-like protein	0.0691824	55
1288939	1289937	-	998	CDS	Bphy_1149		monosaccharide-transporting ATPase	0.0540541	54
1289934	1291013	-	1079	CDS	Bphy_1150		ABC-type sugar transport system periplasmic component-like protein	0.0509259	55
1291362	1291826	-	464	CDS	Bphy_1151		hypothetical protein	0.0817204	38
1291911	1292918	-	1007	CDS	Bphy_1152		RpiR family transcriptional regulator	0.0644841	65
1292875	1293942	-	1067	CDS	Bphy_1153		peptidase C45 acyl-coenzyme A:6-aminopenicillanic acid acyl-transferase	0.0608614	65
1293953	1294693	-	740	CDS	Bphy_1154		glnQ ,glutamine ABC transporter ATP-binding protein	0.0769231	57
1294690	1295346	-	656	CDS	Bphy_1155		glnP ,glutamine ABC transporter permease	0.0532725	35
1295373	1296119	-	746	CDS	Bphy_1156		glnH ,glutamine ABC transporter periplasmic protein	0.042838	32
1296503	1297642	-	1139	CDS	Bphy_1157		porin	0.119298	136
1298069	1298974	-	905	CDS	Bphy_1158		LysR family transcriptional regulator	0.0640177	58
1299110	1300531	+	1421	CDS	Bphy_1159		hypothetical protein	0.0548523	78
1300542	1301864	+	1322	CDS	Bphy_1160		major facilitator transporter	0.0332577	44
1301894	1302964	+	1070	CDS	Bphy_1161		beta-lactamase	0.0448179	48
1302990	1304087	-	1097	CDS	Bphy_1162		hypothetical protein	0.0336976	37
1304185	1304406	-	221	CDS	Bphy_1163		hypothetical protein	0.0720721	16
1304606	1305508	-	902	CDS	Bphy_1164		beta-lactamase	0.0287929	26
1305606	1306508	+	902	CDS	Bphy_1165		LysR family transcriptional regulator	0.0952381	86
1306536	1308038	-	1502	CDS	Bphy_1166		major facilitator transporter	0.0525615	79
1308206	1310440	-	2234	CDS	Bphy_1167		DEAD/DEAH box helicase domain-containing protein	0.0841163	188
1310412	1311722	-	1310	CDS	Bphy_1168		hypothetical protein	0.0709382	93
1311719	1314067	-	2348	CDS	Bphy_1169		hypothetical protein	0.0881226	207
1314676	1315800	-	1124	CDS	Bphy_1170		transporter DMT superfamily protein	0.08	90
1315797	1317080	-	1283	CDS	Bphy_1171		class III aminotransferase	0.0506231	65
1317070	1318566	-	1496	CDS	Bphy_1172		hypothetical protein	0.0407482	61
1318575	1319573	-	998	CDS	Bphy_1173		hypothetical protein	0.0500501	50
1319570	1320556	-	986	CDS	Bphy_1174		hypothetical protein	0.0526849	52
1321540	1322946	+	1406	CDS	Bphy_1175		transcriptional regulator	0.0625444	88
1323026	1323730	-	704	CDS	Bphy_1176		carbonate dehydratase	0.058156	41
1324265	1325320	-	1055	CDS	Bphy_1177		hypothetical protein	0.0577652	61
1325342	1326193	-	851	CDS	Bphy_1178		hopanoid biosynthesis associated protein HpnK	0.0434272	37
1326190	1327614	-	1424	CDS	Bphy_1179		hopanoid biosynthesis associated radical SAM protein HpnJ	0.0624561	89
1327667	1328887	-	1220	CDS	Bphy_1180		hopanoid biosynthesis associated glycosyl transferase protein HpnI	0.048321	59
1328971	1329330	-	359	CDS	Bphy_1181		hypothetical protein	0.0916667	33
1329532	1330071	-	539	CDS	Bphy_1182		cytochrome B561	0.0518519	28
1330243	1330929	+	686	CDS	Bphy_1183		two component transcriptional regulator	0.0422125	29
1330926	1332368	+	1442	CDS	Bphy_1184		integral membrane sensor signal transduction histidine kinase	0.045045	65
1332595	1332801	+	206	CDS	Bphy_1185		hypothetical protein	0.0386473	8
1333297	1333749	-	452	CDS	Bphy_1186		nuclear protein SET	0.0596026	27
1333890	1334780	-	890	CDS	Bphy_1187		Nitrilase/cyanide hydratase and apolipoprotein N-acyltransferase	0.030303	27
1334879	1335775	+	896	CDS	Bphy_1188		LysR family transcriptional regulator	0.0345596	31
1335765	1337120	-	1355	CDS	Bphy_1189		integral membrane sensor signal transduction histidine kinase	0.00589971	8
1337117	1337863	-	746	CDS	Bphy_1190		two component transcriptional regulator	0.0281124	21
1337899	1338270	-	371	CDS	Bphy_1191		glutathione-dependent formaldehyde-activating protein	0.0188172	7
1338299	1338580	-	281	CDS	Bphy_1192		hypothetical protein	0.0567376	16
1338799	1339863	-	1064	CDS	Bphy_1193		diguanylate phosphodiesterase	0.0366197	39
1340043	1340366	+	323	CDS	Bphy_1194		hypothetical protein	0.0709877	23
1340440	1340781	-	341	CDS	Bphy_1195		hypothetical protein	0.0555556	19
1340999	1342072	+	1073	CDS	Bphy_1196		me "catalase (pseudogene) ,catalase (pseudogene)"	0.038175	41
1340999	1342072	+	1073	CDS	Bphy_1196		me "catalase (pseudogene)"	0.038175	41
1342085	1342625	+	540	CDS	Bphy_1197		me "cytochrome B561 (pseudogene) ,cytochrome B561 (pseudogene)"	0.0609982	33
1342085	1342625	+	540	CDS	Bphy_1197		me "cytochrome B561 (pseudogene)"	0.0609982	33
1342904	1344370	-	1466	CDS	Bphy_1198		xylulokinase	0.110429	162
1344771	1344992	+	221	CDS	Bphy_1199		eplicon_xref "NC_010622"	0.0585586	13
1350990	1352912	-	1922	CDS	Bphy_1200		hypothetical protein	0.198648	382
1353832	1354809	+	977	CDS	Bphy_1201		hypothetical protein	0.116564	114
1355000	1356724	+	1724	CDS	Bphy_1202		Pyrrolo-quinoline quinone	0.0608696	105
1356959	1357534	+	575	CDS	Bphy_1203		hypothetical protein	0.0503472	29
1357731	1358711	+	980	CDS	Bphy_1204		quinone oxidoreductase	0.0672783	66
1358846	1358986	+	140	CDS	Bphy_1205		eplicon_xref "NC_010622"	0.0851064	12
1358986	1359159	+	173	CDS	Bphy_1206		eplicon_xref "NC_010622"	0.0862069	15
1359317	1359604	+	287	CDS	Bphy_1207		hypothetical protein	0.0833333	24
1359745	1360290	-	545	CDS	Bphy_1208		hypothetical protein	0.0384615	21
1360386	1361033	-	647	CDS	Bphy_1209		heat shock protein DnaJ domain-containing protein	0.0787037	51
1361207	1362115	+	908	CDS	Bphy_1210		putative transport protein	0.0671067	61
1362390	1363904	+	1514	CDS	Bphy_1211		hypothetical protein	0.0521452	79
1364055	1364822	+	767	CDS	Bphy_1212		hypothetical protein	0.0598958	46
1364803	1365120	+	317	CDS	Bphy_1213		high potential iron-sulfur protein	0.113208	36
1365257	1365922	+	665	CDS	Bphy_1214		hypothetical protein	0.03003	20
1365950	1366303	+	353	CDS	Bphy_1215		hypothetical protein	0.10452	37
1366336	1367598	-	1262	CDS	Bphy_1216		phospholipase D/transphosphatidylase	0.0783848	99
1367681	1367944	-	263	CDS	Bphy_1217		hypothetical protein	0.117424	31
1368002	1368238	+	236	CDS	Bphy_1218		eplicon_xref "NC_010622"	0.118143	28
1368254	1368466	-	212	CDS	Bphy_1219		hypothetical protein	0.112676	24
1368828	1369745	-	917	CDS	Bphy_1220		mechanosensitive ion channel MscS	0.0980392	90
1369960	1371315	+	1355	CDS	Bphy_1221		major facilitator transporter	0.0870206	118
1371436	1371900	+	464	CDS	Bphy_1222		hypothetical protein	0.0688172	32
1371919	1372149	-	230	CDS	Bphy_1223		hypothetical protein	0.103896	24
1372265	1372453	+	188	CDS	Bphy_1224		hypothetical protein	0.0952381	18
1372697	1373674	+	977	CDS	Bphy_1225		glycosyl transferase family protein	0.0899796	88
1373764	1375059	-	1295	CDS	Bphy_1226		major facilitator superfamily metabolite/H(+) symporter	0.0617284	80
1375394	1377130	-	1736	CDS	Bphy_1227		SpoVR family protein	0.106505	185
1377127	1378398	-	1271	CDS	Bphy_1228		hypothetical protein	0.0943396	120
1378540	1380462	-	1922	CDS	Bphy_1229		putative serine protein kinase PrkA	0.153406	295
1380713	1381138	+	425	CDS	Bphy_1230		hypothetical protein	0.115023	49
1381332	1382093	-	761	CDS	Bphy_1231		putative hydratase/decarboxylase	0.0629921	48
1382441	1384228	-	1787	CDS	Bphy_1232		methyl-accepting chemotaxis sensory transducer	0.0715884	128
1384481	1385410	-	929	CDS	Bphy_1233		ribokinase	0.0634409	59
1385485	1386516	-	1031	CDS	Bphy_1234		LacI family transcription regulator	0.0862403	89
1386639	1387670	-	1031	CDS	Bphy_1235		monosaccharide-transporting ATPase	0.117248	121
1387667	1389229	-	1562	CDS	Bphy_1236		ABC transporter-like protein	0.0761356	119
1389569	1390525	-	956	CDS	Bphy_1237		periplasmic binding protein/LacI transcriptional regulator	0.0752351	72
1391053	1391691	+	638	CDS	Bphy_1238		lysine exporter protein LysE/YggA	0.0985915	63
1391740	1392717	-	977	CDS	Bphy_1239		magnesium and cobalt transport protein CorA	0.0480573	47
1392906	1393184	-	278	CDS	Bphy_1240		hypothetical protein	0.0537634	15
1393503	1393691	-	188	CDS	Bphy_1241		hypothetical protein	0.031746	6
1393894	1394562	+	668	CDS	Bphy_1242		hypothetical protein	0.0209268	14
1394714	1395811	-	1097	CDS	Bphy_1243		saccharopine dehydrogenase	0.0692168	76
1396036	1396494	-	458	CDS	Bphy_1244		AsnC family transcriptional regulator	0.0501089	23
1396645	1397511	-	866	CDS	Bphy_1245		LysR family transcriptional regulator	0.0876586	76
1397681	1398196	+	515	CDS	Bphy_1246		hypothetical protein	0.0542636	28
1398366	1398803	+	437	CDS	Bphy_1247		hypothetical protein	0.0616438	27
1398829	1399194	-	365	CDS	Bphy_1248		hypothetical protein	0.0300546	11
1399244	1400047	-	803	CDS	Bphy_1249		putative transmembrane lipoprotein	0.0485075	39
1400125	1401195	-	1070	CDS	Bphy_1250		LacI family transcription regulator	0.0392157	42
1401192	1402160	-	968	CDS	Bphy_1251		D-isomer specific 2-hydroxyacid dehydrogenase	0.0557276	54
1402165	1403439	-	1274	CDS	Bphy_1252		major facilitator transporter	0.0611765	78
1403574	1404536	-	962	CDS	Bphy_1253		ribokinase-like domain-containing protein	0.0612669	59
1404574	1405338	-	764	CDS	Bphy_1254		xylose isomerase domain-containing protein	0.0444444	34
1405469	1406383	-	914	CDS	Bphy_1255		LysR family transcriptional regulator	0.103825	95
1406503	1407588	+	1085	CDS	Bphy_1256		hypothetical protein	0.105893	115
1407757	1408494	+	737	CDS	Bphy_1257		glutathione S-transferase domain-containing protein	0.132791	98
1408632	1410365	+	1733	CDS	Bphy_1258		putative voltage-gated ClC-type chloride channel ClcB	0.0634371	110
1410547	1411884	+	1337	CDS	Bphy_1259		hypothetical protein	0.0762332	102
1412214	1412465	+	251	CDS	Bphy_1260		hypothetical protein	0.0595238	15
1412553	1412783	+	230	CDS	Bphy_1261		hypothetical protein	0.108225	25
1412809	1413681	+	872	CDS	Bphy_1262		AraC family transcriptional regulator	0.0549828	48
1413773	1414147	+	374	CDS	Bphy_1263		cupin 2 domain-containing protein	0.0693333	26
1414172	1414792	-	620	CDS	Bphy_1264		TetR family transcriptional regulator	0.0966184	60
1415016	1416206	+	1190	CDS	Bphy_1265		RND family efflux transporter MFP subunit	0.0973971	116
1416203	1419325	+	3122	CDS	Bphy_1266		acriflavin resistance protein	0.0659622	206
1419328	1420821	+	1493	CDS	Bphy_1267		RND efflux system outer membrane lipoprotein	0.0354752	53
1421150	1423510	-	2360	CDS	Bphy_1268		1A family penicillin-binding protein	0.0821686	194
1424311	1424976	+	665	CDS	Bphy_1269		hypothetical protein	0.132132	88
1425521	1426201	+	680	CDS	Bphy_1270		phage shock protein A	0.0631424	43
1426290	1427513	+	1223	CDS	Bphy_1271		TPR repeat-containing protein	0.0604575	74
1427610	1428290	-	680	CDS	Bphy_1272		TetR family transcriptional regulator	0.0425844	29
1428453	1429934	+	1481	CDS	Bphy_1273		putative flavin-binding monooxygenase-like protein	0.0587045	87
1430237	1430353	-	116	CDS	Bphy_1274		hypothetical protein	0.0940171	11
1430631	1432043	+	1412	CDS	Bphy_1275		methyl-accepting chemotaxis sensory transducer	0.0304317	43
1432131	1432949	-	818	CDS	Bphy_1276		ornithine carbamoyltransferase	0.041514	34
1432949	1433878	-	929	CDS	Bphy_1277		binding-protein-dependent transport systems inner membrane component	0.0688172	64
1433875	1435038	-	1163	CDS	Bphy_1278		spermidine/putrescine ABC transporter ATPase	0.0816151	95
1435143	1436243	-	1100	CDS	Bphy_1279		extracellular solute-binding protein	0.0572207	63
1436736	1438082	+	1346	CDS	Bphy_1280		Mn2+/Fe2+ transporter	0.0831477	112
1438199	1438402	+	203	CDS	Bphy_1281		hypothetical protein	0.0686275	14
1438531	1439178	-	647	CDS	Bphy_1282		OmpW family protein	0.0447531	29
1439272	1440462	-	1190	CDS	Bphy_1283		2-nitropropane dioxygenase	0.0403023	48
1440649	1442085	-	1436	CDS	Bphy_1284		aldehyde dehydrogenase	0.0605428	87
1442253	1443845	-	1592	CDS	Bphy_1285		ABC transporter-like protein	0.0502197	80
1443941	1444834	-	893	CDS	Bphy_1286		2-hydroxy-3-oxopropionate reductase	0.0850112	76
1445017	1445226	+	209	CDS	Bphy_1287		hypothetical protein	0.0666667	14
1445431	1446525	-	1094	CDS	Bphy_1288		basic membrane lipoprotein	0.0593607	65
1446588	1447517	-	929	CDS	Bphy_1289		inner-membrane translocator	0.044086	41
1447549	1448601	-	1052	CDS	Bphy_1290		inner-membrane translocator	0.0664767	70
1448705	1450324	-	1619	CDS	Bphy_1291		me "ABC transporter (pseudogene) ,ABC transporter (pseudogene)"	0.0925926	150
1448705	1450324	-	1619	CDS	Bphy_1291		me "ABC transporter (pseudogene)"	0.0925926	150
1450628	1451557	+	929	CDS	Bphy_1292		LysR family transcriptional regulator	0.0827957	77
1451620	1453029	-	1409	CDS	Bphy_1293		hydroxydechloroatrazine ethylaminohydrolase	0.0659574	93
1453650	1454003	+	353	CDS	Bphy_1294		hydroxyisourate hydrolase	0.0480226	17
1454234	1455424	+	1190	CDS	Bphy_1295		hypothetical protein	0.109152	130
1455748	1456041	+	293	CDS	Bphy_1296		eplicon_xref "NC_010622"	0.0952381	28
1456048	1456557	-	509	CDS	Bphy_1297		ureidoglycolate hydrolase	0.0607843	31
1456554	1457567	-	1013	CDS	Bphy_1298		allantoicase	0.0345168	35
1457656	1458177	-	521	CDS	Bphy_1299		hypothetical protein	0.0766284	40
1458174	1459127	-	953	CDS	Bphy_1300		urate catabolism protein	0.0524109	50
1459273	1460130	-	857	CDS	Bphy_1301		Asp/Glu/hydantoin racemase	0.0571096	49
1460173	1461669	-	1496	CDS	Bphy_1302		cytosine/purines uracil, thiamine, allantoin permease	0.0621242	93
1462052	1462768	-	716	CDS	Bphy_1303		GntR family transcriptional regulator	0.0781032	56
1463094	1464020	-	926	CDS	Bphy_1304		ldcA ,L,D-carboxypeptidase A	0.0237325	22
1464034	1464675	-	641	CDS	Bphy_1305		zinc-binding CMP/dCMP deaminase	0.0109034	7
1464672	1465073	-	401	CDS	Bphy_1306		hypothetical protein	0.0124378	5
1465166	1465480	+	314	CDS	Bphy_1307		hypothetical protein	0.0857143	27
1465635	1466288	+	653	CDS	Bphy_1308		17 kDa surface antigen	0.0993884	65
1466731	1468002	+	1271	CDS	Bphy_1309		radical SAM domain-containing protein	0.0801887	102
1468019	1469491	+	1472	CDS	Bphy_1310		phage SPO1 DNA polymerase-like protein	0.0739986	109
1469516	1470055	+	539	CDS	Bphy_1311		GCN5-like N-acetyltransferase	0.0611111	33
1470105	1471688	-	1583	CDS	Bphy_1312		guaA ,GMP synthase	0	0
1471901	1472725	-	824	CDS	Bphy_1313		hypothetical protein	0.00484848	4
1472732	1474192	-	1460	CDS	Bphy_1314		inosine 5'-monophosphate dehydrogenase	0.000684463	1
1474486	1475460	+	974	CDS	Bphy_1315		hypothetical protein	0.094359	92
1475565	1475897	-	332	CDS	Bphy_1316		hypothetical protein	0.03003	10
1475894	1476283	-	389	CDS	Bphy_1317		cyclase/dehydrase	0.0102564	4
1476463	1476909	+	446	CDS	Bphy_1318		smpB ,SsrA-binding protein	0	0
1476948	1477880	-	932	CDS	Bphy_1319		hypothetical protein	0.0750268	70
1477971	1478423	-	452	CDS	Bphy_1320		hypothetical protein	0.0507726	23
1478543	1480948	-	2405	CDS	Bphy_1321		phosphoenolpyruvate synthase	0	0
1481326	1482159	+	833	CDS	Bphy_1322		hypothetical protein	0.00959233	8
1482185	1482985	-	800	CDS	Bphy_1323		tRNA/rRNA methyltransferase SpoU	0.11236	90
1483053	1483802	-	749	CDS	Bphy_1324		rnhB ,ribonuclease HII	0.064	48
1483799	1484968	-	1169	CDS	Bphy_1325		lpxB ,lipid-A-disaccharide synthase	0	0
1484972	1485760	-	788	CDS	Bphy_1326		UDP-N-acetylglucosamine acyltransferase	0.00126743	1
1485929	1486390	-	461	CDS	Bphy_1327		fabZ ,(3R)-hydroxymyristoyl-ACP dehydratase	0.004329	2
1486560	1487636	-	1076	CDS	Bphy_1328		lpxD ,UDP-3-O-[3-hydroxymyristoyl] glucosamine N-acyltransferase	0	0
1487737	1488273	-	536	CDS	Bphy_1329		outer membrane chaperone Skp	0	0
1488315	1490627	-	2312	CDS	Bphy_1330		outer membrane protein assembly complex, YaeT protein	0	0
1490693	1492081	-	1388	CDS	Bphy_1331		membrane-associated zinc metalloprotease	0	0
1492089	1493294	-	1205	CDS	Bphy_1332		1-deoxy-D-xylulose 5-phosphate reductoisomerase	0	0
1493317	1494138	-	821	CDS	Bphy_1333		phosphatidate cytidylyltransferase	0	0
1494132	1494914	-	782	CDS	Bphy_1334		undecaprenyl diphosphate synthase	0.00255428	2
1494986	1495546	-	560	CDS	Bphy_1335		frr ,ribosome recycling factor	0	0
1495639	1496352	-	713	CDS	Bphy_1336		pyrH ,uridylate kinase	0.00140056	1
1496596	1497477	-	881	CDS	Bphy_1337		tsf ,elongation factor Ts	0.00793651	7
1497671	1498423	-	752	CDS	Bphy_1338		rpsB ,30S ribosomal protein S2	0	0
1498842	1499654	+	812	CDS	Bphy_1339		methionine aminopeptidase	0.0627306	51
1499680	1502259	+	2579	CDS	Bphy_1340		PII uridylyl-transferase	0.0104651	27
1502266	1504140	+	1874	CDS	Bphy_1341		RNA-binding S4 domain-containing protein	0.0693333	130
1504214	1504747	-	533	CDS	Bphy_1342		peptide deformylase	0.082397	44
1504744	1506795	-	2051	CDS	Bphy_1343		DNA ligase, NAD-dependent	0	0
1507047	1507877	+	830	CDS	Bphy_1344		hypothetical protein	0.0830325	69
1508022	1509257	-	1235	CDS	Bphy_1345		FtsZ-binding protein ZipA	0.0202265	25
1509438	1512956	-	3518	CDS	Bphy_1346		chromosome segregation protein SMC	0	0
1513123	1514124	-	1001	CDS	Bphy_1347		hypothetical protein	0.0968064	97
1514417	1515721	+	1304	CDS	Bphy_1348		succinyldiaminopimelate transaminase	0.0613027	80
1515816	1516643	+	827	CDS	Bphy_1349	dapD	2,3,4,5-tetrahydropyridine-2,6-carboxylate N-succinyltransferase	0.00483092	4
1516643	1517014	+	371	CDS	Bphy_1350		arsenate reductase and related	0.0510753	19
1517107	1518246	+	1139	CDS	Bphy_1351		succinyl-diaminopimelate desuccinylase	0.00175439	2
1518262	1519149	+	887	CDS	Bphy_1352		N5-glutamine S-adenosyl-L-methionine-dependent methyltransferase	0.0878378	78
1519465	1520901	+	1436	CDS	Bphy_1353		cls ,cardiolipin synthetase	0.0619346	89
1520908	1521396	-	488	CDS	Bphy_1354		glutathione peroxidase	0.102249	50
1521523	1523463	+	1940	CDS	Bphy_1355		ABC transporter-like protein	0.0824317	160
1523520	1524608	+	1088	CDS	Bphy_1356		L-carnitine dehydratase/bile acid-inducible protein F	0.0909091	99
1524645	1524908	-	263	CDS	Bphy_1357		hypothetical protein	0.0606061	16
1525048	1526424	-	1376	CDS	Bphy_1358		DNA repair protein RadA	0.0573711	79
1526499	1527590	-	1091	CDS	Bphy_1359	alr	alanine racemase	0.000915751	1
1527789	1529096	+	1307	CDS	Bphy_1360		lysophospholipid transporter LplT	0	0
1529176	1529982	+	806	CDS	Bphy_1361		phosphomethylpyrimidine kinase	0.00371747	3
1530011	1531027	-	1016	CDS	Bphy_1362		hypothetical protein	0.0491642	50
1531024	1532049	-	1025	CDS	Bphy_1363		phage SPO1 DNA polymerase-like protein	0.0331384	34
1532036	1532530	-	494	CDS	Bphy_1364		ribosomal-protein-alanine acetyltransferase	0.0484848	24
1532527	1533366	-	839	CDS	Bphy_1365		peptidase M22 glycoprotease	0.0142857	12
1533536	1533805	+	269	CDS	Bphy_1366		acyl-CoA-binding protein	0.122222	33
1534250	1535920	+	1670	CDS	Bphy_1367		DEAD/DEAH box helicase domain-containing protein	0.0191502	32
1536281	1537585	+	1304	CDS	Bphy_1368		isocitrate lyase	0.0927203	121
1537709	1538143	-	434	CDS	Bphy_1369		UspA domain-containing protein	0.0965517	42
1538381	1539283	-	902	CDS	Bphy_1370		LysR family transcriptional regulator	0.0963455	87
1539438	1540226	+	788	CDS	Bphy_1371		type II haloacid dehalogenase	0.0874525	69
1540300	1541892	+	1592	CDS	Bphy_1372		malate synthase	0.0847458	135
1542050	1542457	-	407	CDS	Bphy_1373		AIG2 family protein	0.0882353	36
1542510	1543004	-	494	CDS	Bphy_1374		ribonuclease activity regulator protein RraA	0.0848485	42
1543158	1544042	+	884	CDS	Bphy_1375		AraC family transcriptional regulator	0.0892655	79
1544112	1544576	-	464	CDS	Bphy_1376		GCN5-like N-acetyltransferase	0.0752688	35
1545637	1547046	-	1409	CDS	Bphy_1377		gltX ,glutamyl-tRNA synthetase	0	0
1547302	1548378	+	1076	CDS	Bphy_1378		patatin	0.116992	126
1548464	1549135	-	671	CDS	Bphy_1379		NLP/P60 protein	0.0119048	8
1549298	1550917	-	1619	CDS	Bphy_1380		ABC transporter-like protein	0.0802469	130
1550914	1552017	-	1103	CDS	Bphy_1381		binding-protein-dependent transport systems inner membrane component	0.0679348	75
1552019	1553059	-	1040	CDS	Bphy_1382		binding-protein-dependent transport systems inner membrane component	0.0566763	59
1553137	1555059	-	1922	CDS	Bphy_1383		extracellular solute-binding protein	0.0608424	117
1555179	1555970	+	791	CDS	Bphy_1384		enoyl-(acyl carrier protein) reductase	0.00505051	4
1556063	1556401	-	338	CDS	Bphy_1385		hypothetical protein	0.0560472	19
1557140	1558390	-	1250	CDS	Bphy_1386		aspartate kinase	0	0
1558863	1560281	-	1418	CDS	Bphy_1387		tRNA(Ile)-lysidine synthetase	0.00140944	2
1560327	1561298	-	971	CDS	Bphy_1388		acetyl-CoA carboxylase carboxyltransferase subunit alpha	0	0
1561457	1562479	-	1022	CDS	Bphy_1389		HhH-GPD family protein	0.0136852	14
1562527	1563924	-	1397	CDS	Bphy_1390	cysS	cysteinyl-tRNA synthetase	0	0
1564087	1564983	+	896	CDS	Bphy_1391		TPR repeat-containing protein	0.00780379	7
1565066	1565647	+	581	CDS	Bphy_1392		cyclophilin type peptidyl-prolyl cis-trans isomerase	0.0859107	50
1565794	1566288	+	494	CDS	Bphy_1393		cyclophilin type peptidyl-prolyl cis-trans isomerase	0.10101	50
1566355	1567155	+	800	CDS	Bphy_1394		UDP-2,3-diacylglucosamine hydrolase	0.0062422	5
1567233	1568048	-	815	CDS	Bphy_1395		serine O-acetyltransferase	0.0955882	78
1568296	1569126	-	830	CDS	Bphy_1396		RNA methyltransferase	0.0541516	45
1569484	1570287	+	803	CDS	Bphy_1397		inositol-phosphate phosphatase	0.00248756	2
1570419	1571717	+	1298	CDS	Bphy_1398		lysophospholipid transporter LplT	0.0777521	101
1571839	1574517	+	2678	CDS	Bphy_1399		DNA mismatch repair protein MutS	0.0656962	176
1574504	1575733	+	1229	CDS	Bphy_1400		hypothetical protein	0.0569106	70
1575832	1576383	-	551	CDS	Bphy_1401		FKBP-type peptidyl-prolyl cis-trans isomerase 2-like protein	0.0960145	53
1576551	1577663	+	1112	CDS	Bphy_1402		cupin 4 family protein	0.105121	117
1578477	1580750	-	2273	CDS	Bphy_1403		helicase c2	0.0734389	167
1580820	1581038	-	218	CDS	Bphy_1404		hypothetical protein	0.0639269	14
1581169	1582011	-	842	CDS	Bphy_1405		lipoprotein	0.0581257	49
1582366	1584708	+	2342	CDS	Bphy_1406		RNA-binding S1 domain-containing protein	0.0554844	130
1584877	1586763	-	1886	CDS	Bphy_1407		K potassium transporter	0	0
1587083	1587667	-	584	CDS	Bphy_1408		phosphoribosyltransferase	0.0324786	19
1587671	1589017	-	1346	CDS	Bphy_1409		adenylosuccinate synthetase	0	0
1589227	1590378	-	1151	CDS	Bphy_1410		hisZ ,ATP phosphoribosyltransferase regulatory subunit	0.000868056	1
1590646	1590837	-	191	CDS	Bphy_1411		hypothetical protein	0.00520833	1
1590881	1591795	-	914	CDS	Bphy_1412		hypothetical protein	0	0
1591806	1593203	-	1397	CDS	Bphy_1413		HflK protein	0.00214592	3
1593234	1594478	-	1244	CDS	Bphy_1414		GTP-binding proten HflX	0.0634538	79
1594537	1594773	-	236	CDS	Bphy_1415		hfq ,RNA-binding protein Hfq	0.0253165	6
1594964	1596304	-	1340	CDS	Bphy_1416		engA ,GTP-binding protein EngA	0.000745712	1
1596705	1597865	-	1160	CDS	Bphy_1417		outer membrane assembly lipoprotein YfgL	0.000861326	1
1597919	1598545	-	626	CDS	Bphy_1418		hypothetical protein	0	0
1598632	1599972	-	1340	CDS	Bphy_1419		hisS ,histidyl-tRNA synthetase	0.000745712	1
1600006	1601319	-	1313	CDS	Bphy_1420		ispG ,4-hydroxy-3-methylbut-2-en-1-yl diphosphate synthase	0	0
1601443	1602552	-	1109	CDS	Bphy_1421		XRE family transcriptional regulator	0.00900901	10
1602762	1603910	-	1148	CDS	Bphy_1422		radical SAM protein	0.00435161	5
1604019	1604444	-	425	CDS	Bphy_1423		ndk ,nucleoside diphosphate kinase	0.00234742	1
1604769	1605467	+	698	CDS	Bphy_1424		hypothetical protein	0.0658083	46
1605583	1606356	-	773	CDS	Bphy_1425		beta-lactamase domain-containing protein	0.0891473	69
1606365	1607513	-	1148	CDS	Bphy_1426		putative lipoprotein	0.0391645	45
1607620	1608528	-	908	CDS	Bphy_1427		dihydrodipicolinate synthase	0.0165017	15
1608571	1609188	-	617	CDS	Bphy_1428		hypothetical protein	0.0582524	36
1609188	1610390	-	1202	CDS	Bphy_1429		tryptophanyl-tRNA synthetase	0.00166251	2
1610400	1611062	-	662	CDS	Bphy_1430		peptidase M50	0.0165913	11
1611121	1611813	-	692	CDS	Bphy_1431		Sua5/YciO/YrdC/YwlC family protein	0.103896	72
1611830	1612663	-	833	CDS	Bphy_1432		phosphotransferase domain-containing protein	0.0503597	42
1612748	1613656	-	908	CDS	Bphy_1433		alpha/beta hydrolase fold protein	0.134213	122
1613724	1614578	-	854	CDS	Bphy_1434		hypothetical protein	0.0877193	75
1614779	1615303	+	524	CDS	Bphy_1435		hexapaptide repeat-containing transferase	0.0838095	44
1615368	1616318	+	950	CDS	Bphy_1436		Hsp33 protein	0.0683491	65
1616440	1616826	+	386	CDS	Bphy_1437		putative lipoprotein	0.0490956	19
1616938	1617387	-	449	CDS	Bphy_1438		ftsB ,cell division protein FtsB	0.0288889	13
1617530	1618813	-	1283	CDS	Bphy_1439		eno ,phosphopyruvate hydratase	0	0
1618953	1619807	-	854	CDS	Bphy_1440		2-dehydro-3-deoxyphosphooctonate aldolase	0	0
1619804	1621465	-	1661	CDS	Bphy_1441		pyrG ,CTP synthetase	0.00300842	5
1621614	1622408	-	794	CDS	Bphy_1442		alpha/beta hydrolase fold protein	0.0943396	75
1622460	1624991	-	2531	CDS	Bphy_1443		DNA internalization-related competence protein ComEC/Rec2	0.0687204	174
1625090	1625878	-	788	CDS	Bphy_1444		TatD-related deoxyribonuclease	0.0659062	52
1625914	1626657	-	743	CDS	Bphy_1445		lipoprotein releasing system, ATP-binding protein	0	0
1626650	1627903	-	1253	CDS	Bphy_1446		LolC/E family lipoprotein releasing system, transmembrane protein	0.00318979	4
1628211	1629305	+	1094	CDS	Bphy_1447		hypothetical protein	0.0136986	15
1629302	1631035	+	1733	CDS	Bphy_1448		single-stranded-DNA-specific exonuclease RecJ	0.0628604	109
1631751	1632830	+	1079	CDS	Bphy_1449		peptide chain release factor 2	0.00277778	3
1632938	1634476	+	1538	CDS	Bphy_1450		lysS ,lysyl-tRNA synthetase	0	0
1634833	1635561	+	728	CDS	Bphy_1451		17 kDa surface antigen	0.0672154	49
1635636	1635833	-	197	CDS	Bphy_1452		FeS assembly protein IscX	0.040404	8
1635849	1636190	-	341	CDS	Bphy_1453		ferredoxin, 2Fe-2S type, ISC system	0.0204678	7
1636286	1638157	-	1871	CDS	Bphy_1454		hscA ,chaperone protein HscA	0	0
1638249	1638776	-	527	CDS	Bphy_1455		hscB ,co-chaperone HscB	0	0
1638894	1639250	-	356	CDS	Bphy_1456		iron-sulfur cluster assembly protein IscA	0	0
1639365	1639772	-	407	CDS	Bphy_1457		FeS cluster assembly scaffold IscU	0	0
1639832	1641055	-	1223	CDS	Bphy_1458		cysteine desulfurase	0	0
1641125	1641649	-	524	CDS	Bphy_1459		BadM/Rrf2 family transcriptional regulator	0.00571429	3
1641761	1642288	-	527	CDS	Bphy_1460		protein tyrosine phosphatase	0.0662879	35
1642402	1642638	-	236	CDS	Bphy_1461		hypothetical protein	0.135021	32
1642910	1643398	+	488	CDS	Bphy_1462		hypothetical protein	0.0899796	44
1643517	1644929	-	1412	CDS	Bphy_1463		hypothetical protein	0.11465	162
1644986	1645708	-	722	CDS	Bphy_1464		hypothetical protein	0.11065	80
1645896	1646702	+	806	CDS	Bphy_1465		IclR family transcriptional regulator	0.0483271	39
1646785	1647948	-	1163	CDS	Bphy_1466		peptidase S11 D-alanyl-D-alanine carboxypeptidase 1	0.0420962	49
1648719	1649303	+	584	CDS	Bphy_1467		phasin family protein	0.14188	83
1649666	1651723	-	2057	CDS	Bphy_1468		dihydrolipoamide dehydrogenase	0.0126336	26
1651989	1653635	-	1646	CDS	Bphy_1469		dihydrolipoamide acetyltransferase	0	0
1653718	1656417	-	2699	CDS	Bphy_1470	aceE	aceE ,pyruvate dehydrogenase subunit E1	0	0
1656683	1659208	+	2525	CDS	Bphy_1471		multi-sensor signal transduction histidine kinase	0.00712589	18
1659205	1659849	+	644	CDS	Bphy_1472		two component LuxR family transcriptional regulator	0.0217054	14
1660202	1661512	+	1310	CDS	Bphy_1473		hypothetical protein	0.0961098	126
1661602	1662516	+	914	CDS	Bphy_1474		hypothetical protein	0.104918	96
1662868	1663725	+	857	CDS	Bphy_1475		methenyltetrahydrofolate cyclohydrolase	0	0
1664151	1666265	+	2114	CDS	Bphy_1476		oligopeptidase A	0.0676123	143
1666382	1667671	-	1289	CDS	Bphy_1477		cytosine deaminase	0.0666667	86
1668146	1668922	+	776	CDS	Bphy_1478		exodeoxyribonuclease III Xth	0.0669241	52
1669029	1670543	-	1514	CDS	Bphy_1479	ntrC	nitrogen metabolism transcriptional regulator NtrC	0.00792079	12
1670590	1671732	-	1142	CDS	Bphy_1480	ntrB	signal transduction histidine kinase, nitrogen specific, NtrB	0.0192476	22
1671882	1673297	-	1415	CDS	Bphy_1481		glutamine synthetase, type I	0	0
1673713	1674177	+	464	CDS	Bphy_1482		hypothetical protein	0.111828	52
1674346	1675179	-	833	CDS	Bphy_1483		molybdopterin binding domain-containing protein	0.0683453	57
1675192	1676061	-	869	CDS	Bphy_1484		hypothetical protein	0.083908	73
1676280	1677263	-	983	CDS	Bphy_1485		fatty acid hydroxylase	0.0792683	78
1677345	1678358	-	1013	CDS	Bphy_1486		YVTN beta-propeller repeat-containing protein	0.115385	117
1678882	1680300	+	1418	CDS	Bphy_1487		YadA domain-containing protein	0.0887949	126
1680399	1684787	-	4388	CDS	Bphy_1488		ATP-dependent helicase HrpA	0.05491	241
1684811	1686190	+	1379	CDS	Bphy_1489		N-acetylglutamate synthase	0.00217391	3
1686246	1686521	+	275	CDS	Bphy_1490		hypothetical protein	0.0253623	7
1687264	1688733	+	1469	CDS	Bphy_1491		general substrate transporter	0.0503401	74
1688790	1689272	-	482	CDS	Bphy_1492		phosphodiesterase	0.0786749	38
1689289	1690077	-	788	CDS	Bphy_1493		hypothetical protein	0.0316857	25
1690081	1690656	-	575	CDS	Bphy_1494		hypothetical protein	0.0416667	24
1690772	1691104	-	332	CDS	Bphy_1495		cupin 2 domain-containing protein	0.123123	41
1691126	1692529	-	1403	CDS	Bphy_1496		mercuric reductase	0.045584	64
1692657	1692848	-	191	CDS	Bphy_1497		hypothetical protein	0.0625	12
1693119	1693820	-	701	CDS	Bphy_1498		glutathione S-transferase domain-containing protein	0.0498575	35
1693928	1694215	+	287	CDS	Bphy_1499		hypothetical protein	0.0555556	16
1695210	1696283	+	1073	CDS	Bphy_1500		LacI family transcription regulator	0.0363128	39
1696343	1697389	+	1046	CDS	Bphy_1501		extracellular solute-binding protein	0.0754537	79
1697386	1698210	+	824	CDS	Bphy_1502		binding-protein-dependent transport systems inner membrane component	0.0412121	34
1698216	1699154	+	938	CDS	Bphy_1503		binding-protein-dependent transport systems inner membrane component	0.0607029	57
1699151	1700203	+	1052	CDS	Bphy_1504		ABC transporter-like protein	0.0636277	67
1700340	1701167	+	827	CDS	Bphy_1505		metallophosphoesterase	0.0301932	25
1701294	1702508	+	1214	CDS	Bphy_1506		major facilitator transporter	0.0246914	30
1702580	1703011	-	431	CDS	Bphy_1507		response regulator receiver protein	0.0462963	20
1703044	1703754	-	710	CDS	Bphy_1508		two component LuxR family transcriptional regulator	0.0421941	30
1703797	1704342	-	545	CDS	Bphy_1509		Ferritin Dps family protein	0.0586081	32
1704439	1704600	-	161	CDS	Bphy_1510		hypothetical protein	0.0308642	5
1704693	1704869	-	176	CDS	Bphy_1511		hypothetical protein	0.0677966	12
1705096	1706640	+	1544	CDS	Bphy_1512		integral membrane sensor signal transduction histidine kinase	0.0485437	75
1706891	1707028	+	137	CDS	Bphy_1513		entericidin EcnAB	0.057971	8
1707200	1707988	-	788	CDS	Bphy_1514		putative lipoprotein	0.0633714	50
1708350	1710410	+	2060	CDS	Bphy_1515		NADH:flavin oxidoreductase/NADH oxidase	0.0645318	133
1710438	1711358	-	920	CDS	Bphy_1516		hypothetical protein	0.0553746	51
1711499	1711747	+	248	CDS	Bphy_1517		hypothetical protein	0.0682731	17
1712223	1714154	+	1931	CDS	Bphy_1518		thiamine biosynthesis protein ThiC	0	0
1714429	1714641	+	212	CDS	Bphy_1519		hypothetical protein	0.0328638	7
1715037	1715639	+	602	CDS	Bphy_1520		hypothetical protein	0.092869	56
1715909	1717507	+	1598	CDS	Bphy_1521		L-lactate transport	0.0706692	113
1717666	1718640	+	974	CDS	Bphy_1522		hypothetical protein	0.0707692	69
1719252	1720484	-	1232	CDS	Bphy_1523		putative exported lipoprotein	0.0291971	36
1721035	1721514	+	479	CDS	Bphy_1524		hypothetical protein	0.158333	76
1721525	1722850	+	1325	CDS	Bphy_1525		hypothetical protein	0.081448	108
1722943	1725150	-	2207	CDS	Bphy_1526		YadA domain-containing protein	0.0566123	125
1725536	1725766	-	230	CDS	Bphy_1527		hypothetical protein	0.0822511	19
1725896	1726372	-	476	CDS	Bphy_1528		hypothetical protein	0.0440252	21
1726471	1727238	-	767	CDS	Bphy_1529		ABC transporter-like protein	0.0651042	50
1727242	1727919	-	677	CDS	Bphy_1530		polar amino acid ABC transporter inner membrane subunit	0.0693215	47
1727941	1728723	-	782	CDS	Bphy_1531		extracellular solute-binding protein	0.0766284	60
1729204	1730655	-	1451	CDS	Bphy_1532		phenylhydantoinase	0.0619835	90
1730688	1732199	-	1511	CDS	Bphy_1533		NCS1 nucleoside transporter	0.047619	72
1732257	1733567	-	1310	CDS	Bphy_1534		dihydropyrimidine dehydrogenase	0.0343249	45
1733617	1734966	-	1349	CDS	Bphy_1535		putative oxidoreductase	0.0214815	29
1735082	1736359	-	1277	CDS	Bphy_1536		allantoate amidohydrolase	0.043036	55
1736756	1737460	+	704	CDS	Bphy_1537		TetR family transcriptional regulator	0.0439716	31
1737474	1738724	-	1250	CDS	Bphy_1538		benzoyl-CoA oxygenase/reductase, BoxA protein	0.0463629	58
1738770	1740197	-	1427	CDS	Bphy_1539		benzoyl-CoA oxygenase subunit BoxB	0.0532213	76
1740250	1741932	-	1682	CDS	Bphy_1540		benzoyl-CoA-dihydrodiol lyase	0.0439691	74
1742067	1743020	-	953	CDS	Bphy_1541		anaerobic benzoate catabolism transcriptional regulator	0.0628931	60
1743274	1743753	+	479	CDS	Bphy_1542		hypothetical protein	0.0520833	25
1743823	1745421	+	1598	CDS	Bphy_1543		benzoate-CoA ligase family	0.0600375	96
1745430	1746284	+	854	CDS	Bphy_1544		alpha/beta hydrolase fold protein	0.0444444	38
1746547	1746891	+	344	CDS	Bphy_1545		hypothetical protein	0.0550725	19
1746966	1749080	+	2114	CDS	Bphy_1546		phospholipase C	0.0690307	146
1749171	1749875	-	704	CDS	Bphy_1547		glutathione S-transferase domain-containing protein	0.0397163	28
1749979	1751049	-	1070	CDS	Bphy_1548		hypothetical protein	0.0662932	71
1751075	1757068	-	5993	CDS	Bphy_1549		excinuclease ABC subunit A	0.0587254	352
1757763	1758047	+	284	CDS	Bphy_1550		hypothetical protein	0.0982456	28
1758355	1758753	-	398	CDS	Bphy_1551		MerR family transcriptional regulator	0.102757	41
1758808	1759161	-	353	CDS	Bphy_1552		integration host factor subunit alpha	0.0338983	12
1759273	1761705	-	2432	CDS	Bphy_1553		pheT ,phenylalanyl-tRNA synthetase subunit beta	0	0
1761837	1762859	-	1022	CDS	Bphy_1554		pheS ,phenylalanyl-tRNA synthetase subunit alpha	0	0
1763009	1763368	-	359	CDS	Bphy_1555		rplT ,50S ribosomal protein L20	0	0
1763398	1763595	-	197	CDS	Bphy_1556		rpmI ,50S ribosomal protein L35	0	0
1763852	1764322	-	470	CDS	Bphy_1557		translation initiation factor IF-3	0	0
1764427	1766334	-	1907	CDS	Bphy_1558		thrS ,threonyl-tRNA synthetase	0	0
1766792	1769032	-	2240	CDS	Bphy_1559	relA	(p)ppGpp synthetase I SpoT/RelA	0.109772	246
1769091	1769444	-	353	CDS	Bphy_1560		endoribonuclease L-PSP	0.0903955	32
1769548	1770468	-	920	CDS	Bphy_1561		alpha/beta hydrolase fold protein	0.127036	117
1770678	1771319	-	641	CDS	Bphy_1562		3-oxoacid CoA-transferase subunit B	0.0841121	54
1771322	1772026	-	704	CDS	Bphy_1563		3-oxoacid CoA-transferase subunit A	0.0723404	51
1772303	1772848	+	545	CDS	Bphy_1564		LuxR family transcriptional regulator	0.0970696	53
1772908	1773336	-	428	CDS	Bphy_1565		thioesterase superfamily protein	0.11655	50
1773552	1774328	-	776	CDS	Bphy_1566		short chain dehydrogenase	0.0823681	64
1774515	1776188	+	1673	CDS	Bphy_1567		electron-transferring-flavoprotein dehydrogenase	0.00119474	2
1776252	1777715	-	1463	CDS	Bphy_1568		TPR repeat-containing protein	0.0846995	124
1777762	1778862	-	1100	CDS	Bphy_1569		chorismate synthase	0.000908265	1
1779015	1780952	-	1937	CDS	Bphy_1570		phospholipid/glycerol acyltransferase	0.0644995	125
1781110	1781607	-	497	CDS	Bphy_1571		CBS domain-containing protein	0.0522088	26
1781979	1783313	+	1334	CDS	Bphy_1572		O-acetylhomoserine aminocarboxypropyltransferase	0.0554307	74
1783310	1784155	+	845	CDS	Bphy_1573		alpha/beta hydrolase fold protein	0.0732861	62
1784295	1784618	+	323	CDS	Bphy_1574		hypothetical protein	0.095679	31
1784661	1785980	-	1319	CDS	Bphy_1575		ribonuclease BN	0.119697	158
1786163	1786771	+	608	CDS	Bphy_1576		flavoprotein WrbA	0.0788177	48
1786774	1787199	+	425	CDS	Bphy_1577		hypothetical protein	0.0962441	41
1787311	1788738	+	1427	CDS	Bphy_1578		FAD linked oxidase domain-containing protein	0.0434174	62
1788778	1789620	+	842	CDS	Bphy_1579		metallophosphoesterase	0.0569395	48
1789640	1789801	-	161	CDS	Bphy_1580		hypothetical protein	0.0802469	13
1789969	1790907	-	938	CDS	Bphy_1581		LysR family transcriptional regulator	0.132055	124
1791074	1792621	+	1547	CDS	Bphy_1582		RND efflux system outer membrane lipoprotein	0.0574935	89
1792636	1794870	+	2234	CDS	Bphy_1583		fusaric acid resistance protein	0.0326622	73
1794860	1795060	+	200	CDS	Bphy_1584		hypothetical protein	0.0447761	9
1795078	1795938	+	860	CDS	Bphy_1585		secretion protein HlyD family protein	0.0673635	58
1796090	1797751	-	1661	CDS	Bphy_1586		methyl-accepting chemotaxis sensory transducer	0.0288809	48
1798208	1799446	+	1238	CDS	Bphy_1587		major facilitator transporter	0.0702179	87
1799620	1801620	+	2000	CDS	Bphy_1588		prpE ,propionyl-CoA synthetase	0.063968	128
1801660	1802448	-	788	CDS	Bphy_1589		5'-methylthioadenosine/S-adenosylhomocysteine nucleosidase	0.0633714	50
1802445	1804817	-	2372	CDS	Bphy_1590		UvrD/REP helicase	0.00168563	4
1805086	1807959	+	2873	CDS	Bphy_1591		valS ,valyl-tRNA synthetase	0	0
1808032	1808913	+	881	CDS	Bphy_1592		UTP-glucose-1-phosphate uridylyltransferase	0.113379	100
1809137	1809373	-	236	CDS	Bphy_1593		SirA family protein	0.021097	5
1809484	1810506	-	1022	CDS	Bphy_1594		oxidoreductase domain-containing protein	0.0342131	35
1810506	1811525	-	1019	CDS	Bphy_1595		inositol 2-dehydrogenase	0.0303922	31
1811518	1812399	-	881	CDS	Bphy_1596		RpiR family transcriptional regulator	0.0430839	38
1812682	1813737	+	1055	CDS	Bphy_1597		ABC sugar transporter periplasmic ligand binding protein	0.0274621	29
1814207	1815364	+	1157	CDS	Bphy_1598		monosaccharide-transporting ATPase	0.0362694	42
1815382	1816185	+	803	CDS	Bphy_1599		ABC transporter-like protein	0.0236318	19
1816232	1818244	+	2012	CDS	Bphy_1600		ribokinase-like domain-containing protein	0.0357675	72
1818241	1820190	+	1949	CDS	Bphy_1601		thiamine pyrophosphate protein central region	0.0323077	63
1820201	1821121	+	920	CDS	Bphy_1602		xylose isomerase domain-containing protein	0.0260586	24
1821118	1821924	+	806	CDS	Bphy_1603		myo-inositol catabolism IolB domain-containing protein	0.0780669	63
1822847	1823560	-	713	CDS	Bphy_1604		ABC transporter-like protein	0.0322129	23
1823557	1824327	-	770	CDS	Bphy_1605		ABC transporter-like protein	0.0207523	16
1824324	1825583	-	1259	CDS	Bphy_1606		inner-membrane translocator	0.0309524	39
1825576	1826526	-	950	CDS	Bphy_1607		inner-membrane translocator	0.0336488	32
1826530	1826982	-	452	CDS	Bphy_1608		thioesterase superfamily protein	0.0441501	20
1827012	1828160	-	1148	CDS	Bphy_1609		alcohol dehydrogenase	0.0287206	33
1828233	1829264	-	1031	CDS	Bphy_1610		threonine aldolase	0.0368217	38
1829466	1830695	-	1229	CDS	Bphy_1611		hypothetical protein	0.0829268	102
1830799	1831704	+	905	CDS	Bphy_1612		LysR family transcriptional regulator	0.0673289	61
1831837	1834461	-	2624	CDS	Bphy_1613		alaS ,alanyl-tRNA synthetase	0	0
1834768	1835988	+	1220	CDS	Bphy_1614		L-carnitine dehydratase/bile acid-inducible protein F	0.0769861	94
1836125	1836676	-	551	CDS	Bphy_1615		hypothetical protein	0.0543478	30
1836724	1838502	-	1778	CDS	Bphy_1616		gamma-glutamyltransferase	0.0550871	98
1838855	1839544	+	689	CDS	Bphy_1617		Ser/Thr protein phosphatase family protein	0.0594203	41
1839561	1839938	+	377	CDS	Bphy_1618		cytochrome c oxidase subunit II	0.0820106	31
1839948	1840859	-	911	CDS	Bphy_1619		LysR family transcriptional regulator	0.060307	55
1841045	1842820	+	1775	CDS	Bphy_1620		glyoxylate carboligase	0.0563063	100
1842930	1843730	+	800	CDS	Bphy_1621		hydroxypyruvate isomerase	0.0411985	33
1843801	1844709	+	908	CDS	Bphy_1622		2-hydroxy-3-oxopropionate reductase	0.0407041	37
1844956	1846218	-	1262	CDS	Bphy_1623		L-sorbosone dehydrogenase	0.064133	81
1846548	1847615	-	1067	CDS	Bphy_1624		type II L-asparaginase	0.0524345	56
1847665	1848591	-	926	CDS	Bphy_1625		transcriptional regulator CysB-like protein	0.0614887	57
1848700	1849758	-	1058	CDS	Bphy_1626		sulfate ABC transporter ATPase	0.0849858	90
1849774	1850778	-	1004	CDS	Bphy_1627		sulfate ABC transporter inner membrane subunit CysW	0.080597	81
1850775	1851671	-	896	CDS	Bphy_1628		sulfate ABC transporter inner membrane subunit CysT	0.0423634	38
1851767	1852810	-	1043	CDS	Bphy_1629		sulfate ABC transporter periplasmic sulfate-binding protein	0.0881226	92
1853111	1853761	+	650	CDS	Bphy_1630		LexA repressor	0.015361	10
1853789	1854133	+	344	CDS	Bphy_1631		hypothetical protein	0.0695652	24
1854218	1854871	+	653	CDS	Bphy_1632		putative transmembrane protein	0.059633	39
1854899	1855363	-	464	CDS	Bphy_1633		UspA domain-containing protein	0.0709677	33
1855625	1856539	+	914	CDS	Bphy_1634	nodI1	nodulation ABC transporter NodI	0.120219	110
1856583	1857410	+	827	CDS	Bphy_1635		ABC transporter	0.0603865	50
1857468	1857890	-	422	CDS	Bphy_1636		hypothetical protein	0.0283688	12
1858137	1859201	-	1064	CDS	Bphy_1637		permease	0.0431925	46
1859480	1860532	-	1052	CDS	Bphy_1638		aldo/keto reductase	0.0626781	66
1860695	1862137	+	1442	CDS	Bphy_1639		EmrB/QacA family drug resistance transporter	0.036729	53
1862178	1862390	+	212	CDS	Bphy_1640		putative cytoplasmic protein	0.0516432	11
1862685	1863686	-	1001	CDS	Bphy_1641		YjbN family TIM-barrel protein	0.0688623	69
1864039	1864305	+	266	CDS	Bphy_1642		hypothetical protein	0.127341	34
1864707	1864958	-	251	CDS	Bphy_1643		hypothetical protein	0.0436508	11
1865043	1865243	-	200	CDS	Bphy_1644		hypothetical protein	0.0845771	17
1865469	1865744	+	275	CDS	Bphy_1645		hypothetical protein	0.0507246	14
1865811	1866026	-	215	CDS	Bphy_1646		TOBE domain-containing protein	0.0555556	12
1866085	1867077	-	992	CDS	Bphy_1647		ABC transporter-like protein	0.0433031	43
1867074	1867925	-	851	CDS	Bphy_1648		binding-protein-dependent transport systems inner membrane component	0.0387324	33
1867976	1869133	-	1157	CDS	Bphy_1649		alkanesulfonate monooxygenase	0.0405872	47
1869179	1869433	+	254	CDS	Bphy_1650		hypothetical protein	0.0352941	9
1869754	1870173	+	419	CDS	Bphy_1651		putative transmembrane protein	0.047619	20
1870245	1871375	-	1130	CDS	Bphy_1652		3-hydroxyisobutyryl-CoA hydrolase	0.0530504	60
1871496	1872242	-	746	CDS	Bphy_1653		TetR family transcriptional regulator	0.064257	48
1872370	1873350	+	980	CDS	Bphy_1654		NAD-dependent epimerase/dehydratase	0.0866463	85
1873394	1873681	-	287	CDS	Bphy_1655		hypothetical protein	0.0625	18
1873909	1874184	-	275	CDS	Bphy_1656		hypothetical protein	0.076087	21
1874346	1874579	+	233	CDS	Bphy_1657		hypothetical protein	0.106838	25
1874716	1875069	+	353	CDS	Bphy_1658		hypothetical protein	0.079096	28
1875097	1875435	-	338	CDS	Bphy_1659		small multidrug resistance protein	0.0560472	19
1875439	1875936	-	497	CDS	Bphy_1660		hypothetical protein	0.116466	58
1876447	1876992	+	545	CDS	Bphy_1661		NUDIX hydrolase	0.128205	70
1877009	1877746	+	737	CDS	Bphy_1662		aat ,leucyl/phenylalanyl-tRNA--protein transferase	0.0636856	47
1877917	1878756	+	839	CDS	Bphy_1663		arginyl-tRNA-protein transferase	0.109524	92
1878867	1879901	+	1034	CDS	Bphy_1664		dihydroorotate dehydrogenase 2	0.00193237	2
1879954	1880658	-	704	CDS	Bphy_1665		signal peptidase I	0.0425532	30
1880796	1881800	-	1004	CDS	Bphy_1666		oxidoreductase domain-containing protein	0.0557214	56
1881923	1882669	-	746	CDS	Bphy_1667		GntR domain-containing protein	0.0696118	52
1883210	1883800	+	590	CDS	Bphy_1668		hypothetical protein	0.0998308	59
1884197	1884931	+	734	CDS	Bphy_1669		Crp/FNR family transcriptional regulator	0.0530612	39
1884937	1885236	+	299	CDS	Bphy_1670		hypothetical protein	0.04	12
1885242	1885952	+	710	CDS	Bphy_1671		4'-phosphopantetheinyl transferase	0.0436006	31
1886459	1896466	+	10007	CDS	Bphy_1672		amino acid adenylation domain-containing protein	0.0380695	381
1896470	1898800	+	2330	CDS	Bphy_1673		condensation domain-containing protein	0.041184	96
1898820	1899974	+	1154	CDS	Bphy_1674		hypothetical protein	0.0528139	61
1900125	1901417	+	1292	CDS	Bphy_1675		polysaccharide biosynthesis protein	0.033256	43
1902093	1903196	-	1103	CDS	Bphy_1676		acyltransferase 3	0.057971	64
1903257	1904354	-	1097	CDS	Bphy_1677		group 1 glycosyl transferase	0.0892532	98
1904544	1905485	-	941	CDS	Bphy_1678		glycosyl transferase family protein	0.0403397	38
1905729	1907129	-	1400	CDS	Bphy_1679		hypothetical protein	0.0678087	95
1907189	1908406	-	1217	CDS	Bphy_1680		group 1 glycosyl transferase	0.0615764	75
1908394	1909494	-	1100	CDS	Bphy_1681		group 1 glycosyl transferase	0.0526794	58
1909783	1910769	-	986	CDS	Bphy_1682		transcription factor jumonji domain-containing protein	0.0932118	92
1910951	1912024	-	1073	CDS	Bphy_1683		acyltransferase 3	0.110801	119
1912363	1914234	-	1871	CDS	Bphy_1684		FkbH like protein	0.148504	278
1914833	1915915	+	1082	CDS	Bphy_1685		glycosyl transferase family protein	0.089566	97
1916390	1918156	+	1766	CDS	Bphy_1686		hypothetical protein	0.13073	231
1918217	1919608	-	1391	CDS	Bphy_1687		putative calcium binding protein	0.0897989	125
1920030	1921133	+	1103	CDS	Bphy_1688		acyltransferase 3	0.0869565	96
1921680	1923914	-	2234	CDS	Bphy_1689		exopolysaccharide transport protein family	0.0635347	142
1923974	1925260	-	1286	CDS	Bphy_1690		polysaccharide export protein	0.04662	60
1925465	1926595	-	1130	CDS	Bphy_1691		exopolysaccharide biosynthesis polyprenyl glycosylphosphotransferase	0.0389036	44
1926576	1927103	-	527	CDS	Bphy_1692		hypothetical protein	0.094697	50
1927395	1928090	-	695	CDS	Bphy_1693		ribose-5-phosphate isomerase A	0.00143678	1
1928206	1929078	-	872	CDS	Bphy_1694		N-acetylmuramyl-L-alanine amidase, negative regulator of AmpC, AmpD	0.106529	93
1929652	1930713	+	1061	CDS	Bphy_1695		acyltransferase 3	0.379473	403
1930852	1931595	-	743	CDS	Bphy_1696		RNA methyltransferase	0.137097	102
1931729	1934182	-	2453	CDS	Bphy_1697		ribonuclease R	0.0704971	173
1935431	1936654	+	1223	CDS	Bphy_1698		major facilitator transporter	0.129902	159
1936907	1937779	+	872	CDS	Bphy_1699		TetR family transcriptional regulator	0.0652921	57
1937875	1940544	+	2669	CDS	Bphy_1700		fadE ,acyl-CoA dehydrogenase	0.0779026	208
1940675	1942090	+	1415	CDS	Bphy_1701		fabG ,3-ketoacyl-(acyl-carrier-protein) reductase	0.0734463	104
1942095	1943012	+	917	CDS	Bphy_1702		dehydratase	0.0860566	79
1943152	1944480	+	1328	CDS	Bphy_1703		acetyl-CoA acetyltransferase	0.0887886	118
1944579	1946378	+	1799	CDS	Bphy_1704		AMP-dependent synthetase and ligase	0.106111	191
1946412	1946804	-	392	CDS	Bphy_1705		hypothetical protein	0.0559796	22
1946824	1948404	-	1580	CDS	Bphy_1706		FAD linked oxidase domain-containing protein	0.0708412	112
1948496	1948942	-	446	CDS	Bphy_1707		putative lipoprotein	0.0894855	40
1949193	1949987	-	794	CDS	Bphy_1708		putative transmembrane anti-sigma factor	0.0880503	70
1949998	1950516	-	518	CDS	Bphy_1709		ECF subfamily RNA polymerase sigma-24 factor	0.0770713	40
1950550	1950810	-	260	CDS	Bphy_1710		hypothetical protein	0.0689655	18
1951214	1951666	+	452	CDS	Bphy_1711		RNA chaperone Hfq	0.0993377	45
1951727	1951966	-	239	CDS	Bphy_1712		hypothetical protein	0.0708333	17
1952127	1952393	+	266	CDS	Bphy_1713		hypothetical protein	0.11236	30
1952390	1952641	+	251	CDS	Bphy_1714		hypothetical protein	0.0595238	15
1952690	1953361	-	671	CDS	Bphy_1715		putative signal peptide protein	0.0818452	55
1953889	1954374	+	485	CDS	Bphy_1716		putative signal peptide protein	0.150206	73
1954514	1954966	-	452	CDS	Bphy_1717		putative transposase protein	0.101545	46
1955124	1956221	-	1097	CDS	Bphy_1718		AFG1 family ATPase	0.010929	12
1956318	1957748	-	1430	CDS	Bphy_1719		dihydrolipoamide dehydrogenase	0.000698812	1
1957887	1959158	-	1271	CDS	Bphy_1720		dihydrolipoamide succinyltransferase	0	0
1959301	1962156	-	2855	CDS	Bphy_1721		sucA ,2-oxoglutarate dehydrogenase E1 component	0	0
1962532	1964358	-	1826	CDS	Bphy_1722		GTP-binding protein TypA	0.00328407	6
1964674	1965189	+	515	CDS	Bphy_1723		MarR family transcriptional regulator	0.160853	83
1965222	1966769	+	1547	CDS	Bphy_1724		RND efflux system outer membrane lipoprotein	0.0930233	144
1966850	1968070	+	1220	CDS	Bphy_1725		efflux pump membrane protein	0.0958231	117
1968109	1969674	+	1565	CDS	Bphy_1726		EmrB/QacA family drug resistance transporter	0.0836526	131
1970128	1971057	-	929	CDS	Bphy_1727		truB ,tRNA pseudouridine synthase B	0.044086	41
1971081	1971512	-	431	CDS	Bphy_1728		rbfA ,ribosome-binding factor A	0.00231481	1
1971625	1974522	-	2897	CDS	Bphy_1729		infB ,translation initiation factor IF-2	0	0
1974619	1976094	-	1475	CDS	Bphy_1730		nusA ,transcription elongation factor NusA	0	0
1976091	1976549	-	458	CDS	Bphy_1731		hypothetical protein	0	0
1976972	1978765	-	1793	CDS	Bphy_1732		pseudouridine synthase	0	0
1978826	1979908	-	1082	CDS	Bphy_1733		segregation and condensation protein B	0.00554017	6
1980219	1981451	-	1232	CDS	Bphy_1734		aspartate aminotransferase	0.142741	176
1981559	1982461	-	902	CDS	Bphy_1735		LysR family transcriptional regulator	0.122924	111
1982880	1983278	+	398	CDS	Bphy_1736		putative transposase A protein	0.197995	79
1983621	1983938	+	317	CDS	Bphy_1737		hypothetical protein	0.122642	39
1984248	1984562	-	314	CDS	Bphy_1738		hypothetical protein	0.12381	39
1984855	1985541	+	686	CDS	Bphy_1739		hypothetical protein	0.106259	73
1985567	1985836	-	269	CDS	Bphy_1740		hypothetical protein	0.125926	34
1985895	1986131	+	236	CDS	Bphy_1741		putative signal peptide protein	0.0843882	20
1986352	1986609	+	257	CDS	Bphy_1742		hypothetical protein	0.0930233	24
1986704	1987027	-	323	CDS	Bphy_1743		antibiotic biosynthesis monooxygenase	0.0802469	26
1987323	1988597	+	1274	CDS	Bphy_1744		diguanylate phosphodiesterase	0.0533333	68
1988618	1989025	-	407	CDS	Bphy_1745		peptidyl-tRNA hydrolase domain-containing protein	0.0514706	21
1989197	1989856	+	659	CDS	Bphy_1746		putative transmembrane protein	0.0818182	54
1989853	1991871	-	2018	CDS	Bphy_1747		exodeoxyribonuclease V subunit alpha	0.0104012	21
1991868	1995593	-	3725	CDS	Bphy_1748		exodeoxyribonuclease V subunit beta	0.00107354	4
1995590	1998955	-	3365	CDS	Bphy_1749		exodeoxyribonuclease V subunit gamma	0	0
1999163	2001583	+	2420	CDS	Bphy_1750		hypothetical protein	0.0702189	170
2001596	2001841	-	245	CDS	Bphy_1751		hypothetical protein	0.0894309	22
2001918	2002400	-	482	CDS	Bphy_1752		AsnC family transcriptional regulator	0.120083	58
2002533	2003165	+	632	CDS	Bphy_1753		cysteine dioxygenase type I	0.112164	71
2003252	2005891	-	2639	CDS	Bphy_1754		mechanosensitive ion channel MscS	0.0473485	125
2006078	2006725	-	647	CDS	Bphy_1755		NAD-dependent epimerase/dehydratase	0.0432099	28
2006822	2007316	-	494	CDS	Bphy_1756		BadM/Rrf2 family transcriptional regulator	0.0444444	22
2007381	2007851	-	470	CDS	Bphy_1757		hypothetical protein	0.0615711	29
2008028	2008609	+	581	CDS	Bphy_1758		PfpI family intracellular peptidase	0.109966	64
2008727	2009050	+	323	CDS	Bphy_1759		hypothetical protein	0.0679012	22
2009091	2010782	-	1691	CDS	Bphy_1760		histidine kinase	0.0791962	134
2011206	2012408	+	1202	CDS	Bphy_1761		Rh family protein/ammonium transporter	0.0681629	82
2012693	2013073	+	380	CDS	Bphy_1762	crcB	camphor resistance protein CrcB	0.0498688	19
2013227	2013580	+	353	CDS	Bphy_1763		hypothetical protein	0.0536723	19
2013688	2013861	+	173	CDS	Bphy_1764		hypothetical protein	0.0804598	14
2013924	2014589	-	665	CDS	Bphy_1765		hypothetical protein	0.0195195	13
2014705	2015580	-	875	CDS	Bphy_1766		CHAD domain-containing protein	0.0388128	34
2015693	2016028	-	335	CDS	Bphy_1767		hypothetical protein	0.0446429	15
2016399	2016845	+	446	CDS	Bphy_1768		PRC-barrel domain-containing protein	0.0961969	43
2017481	2018317	+	836	CDS	Bphy_1769		IclR family transcriptional regulator	0.137395	115
2018400	2018621	-	221	CDS	Bphy_1770		hypothetical protein	0.117117	26
2018795	2020204	+	1409	CDS	Bphy_1771		RND family efflux transporter MFP subunit	0.1	141
2020220	2023357	+	3137	CDS	Bphy_1772		acriflavin resistance protein	0.0611855	192
2023374	2026685	+	3311	CDS	Bphy_1773		acriflavin resistance protein	0.0543478	180
2026725	2027189	-	464	CDS	Bphy_1774		putative signal peptide transmembrane protein	0.0451613	21
2027313	2027876	-	563	CDS	Bphy_1775		alkyl hydroperoxide reductase/ Thiol specific antioxidant/ Mal allergen	0.0797872	45
2028038	2029384	-	1346	CDS	Bphy_1776		diguanylate phosphodiesterase	0.0564217	76
2029702	2031531	+	1829	CDS	Bphy_1777		diguanylate cyclase/phosphodiesterase	0.0595628	109
2031599	2033056	+	1457	CDS	Bphy_1778		putative signal transduction protein	0.0294925	43
2033137	2034489	-	1352	CDS	Bphy_1779		diguanylate phosphodiesterase	0.0465632	63
2034780	2035577	-	797	CDS	Bphy_1780		cationic amino acid ABC transporter periplasmic binding protein	0.0601504	48
2035661	2035948	-	287	CDS	Bphy_1781		hypothetical protein	0.0381944	11
2036627	2037670	-	1043	CDS	Bphy_1782		succinylglutamate desuccinylase	0.0498084	52
2037654	2038994	-	1340	CDS	Bphy_1783		succinylarginine dihydrolase	0.0119314	16
2039004	2040467	-	1463	CDS	Bphy_1784		astD ,succinylglutamic semialdehyde dehydrogenase	0.0362022	53
2040478	2041503	-	1025	CDS	Bphy_1785		arginine N-succinyltransferase	0.0243665	25
2041500	2042552	-	1052	CDS	Bphy_1786		arginine/ornithine succinyltransferase subunit alpha	0.00759734	8
2042581	2043810	-	1229	CDS	Bphy_1787	argD2	bifunctional N-succinyldiaminopimelate-aminotransferase/acetylornithine transaminase protein	0.0252033	31
2043935	2044987	-	1052	CDS	Bphy_1788		AraC family transcriptional regulator	0.0645774	68
2045021	2045812	-	791	CDS	Bphy_1789		ABC transporter-like protein	0.0517677	41
2045906	2046619	-	713	CDS	Bphy_1790		polar amino acid ABC transporter inner membrane subunit	0.0994398	71
2046648	2047337	-	689	CDS	Bphy_1791		polar amino acid ABC transporter inner membrane subunit	0.0724638	50
2047762	2048370	+	608	CDS	Bphy_1792		type 11 methyltransferase	0.0509031	31
2048401	2049432	-	1031	CDS	Bphy_1793		patatin	0.0697674	72
2049550	2050131	-	581	CDS	Bphy_1794		putative lipoprotein	0.101375	59
2051059	2052069	+	1010	CDS	Bphy_1795		luciferase family protein	0.0652819	66
2052122	2053285	-	1163	CDS	Bphy_1796		alpha/beta hydrolase fold protein	0.0609966	71
2053710	2054978	+	1268	CDS	Bphy_1797	glgC	glgC ,glucose-1-phosphate adenylyltransferase	0.0693459	88
2055160	2056620	+	1460	CDS	Bphy_1798	glgA1	glgA ,glycogen synthase	0.0643395	94
2056898	2057761	+	863	CDS	Bphy_1799		pyridoxal kinase	0.0601852	52
2058160	2058621	+	461	CDS	Bphy_1800		hypothetical protein	0.0909091	42
2058771	2060669	-	1898	CDS	Bphy_1801		putative transmembrane protein	0.0331754	63
2060666	2061511	-	845	CDS	Bphy_1802		AraC family transcriptional regulator	0.0520095	44
2061695	2062243	+	548	CDS	Bphy_1803		hypothetical protein	0.0510018	28
2062272	2063660	-	1388	CDS	Bphy_1804		major facilitator transporter	0.0280778	39
2063804	2065027	-	1223	CDS	Bphy_1805		GntR family transcriptional regulator	0.0433007	53
2065150	2066004	+	854	CDS	Bphy_1806		LysR family transcriptional regulator	0.0397661	34
2066029	2066703	-	674	CDS	Bphy_1807		hypothetical protein	0.0488889	33
2067070	2067882	-	812	CDS	Bphy_1808		N-formylglutamate amidohydrolase	0.0541205	44
2067937	2069367	-	1430	CDS	Bphy_1809		N-formimino-L-glutamate deiminase	0.0384347	55
2069364	2070584	-	1220	CDS	Bphy_1810		imidazolonepropionase	0.036855	45
2070641	2071258	-	617	CDS	Bphy_1811		hypothetical protein	0.0711974	44
2071261	2072949	-	1688	CDS	Bphy_1812		urocanate hydratase	0.0426288	72
2073014	2073718	-	704	CDS	Bphy_1813		histidine utilization repressor	0.0468085	33
2073749	2075272	-	1523	CDS	Bphy_1814		histidine ammonia-lyase	0.0551181	84
2075269	2075613	-	344	CDS	Bphy_1815		hypothetical protein	0.0173913	6
2075672	2076577	+	905	CDS	Bphy_1816		NAD-dependent epimerase/dehydratase	0.0695364	63
2076724	2076906	+	182	CDS	Bphy_1817		hypothetical protein	0.0491803	9
2076940	2077716	-	776	CDS	Bphy_1818		hypothetical protein	0.0630631	49
2077768	2078196	-	428	CDS	Bphy_1819		activator of Hsp90 ATPase 1 family protein	0.0606061	26
2078202	2078525	-	323	CDS	Bphy_1820		eplicon_xref "NC_010622"	0.0709877	23
2078639	2080036	-	1397	CDS	Bphy_1821		xanthine/uracil/vitamin C permease	0.0500715	70
2080528	2081559	+	1031	CDS	Bphy_1822		hypothetical protein	0.0368217	38
2081556	2082815	+	1259	CDS	Bphy_1823		major facilitator transporter	0.0325397	41
2083602	2084948	-	1346	CDS	Bphy_1824		major facilitator transporter	0.0460282	62
2084967	2086130	-	1163	CDS	Bphy_1825		amidohydrolase	0.032646	38
2086266	2087216	+	950	CDS	Bphy_1826		LysR family transcriptional regulator	0.0347003	33
2087348	2088301	-	953	CDS	Bphy_1827		LysR family transcriptional regulator	0.0303983	29
2088429	2089781	+	1352	CDS	Bphy_1828		NADH dehydrogenase	0.0354767	48
2089819	2090712	-	893	CDS	Bphy_1829		chromosome replication initiation inhibitor protein	0.064877	58
2090810	2091424	+	614	CDS	Bphy_1830		lysine exporter protein LysE/YggA	0.0422764	26
2091437	2092402	-	965	CDS	Bphy_1831		hypothetical protein	0.0331263	32
2092420	2093793	-	1373	CDS	Bphy_1832		putative transmembrane protein	0.0393013	54
2093793	2095409	-	1616	CDS	Bphy_1833		group 1 glycosyl transferase	0.0426716	69
2095406	2096455	-	1049	CDS	Bphy_1834		putative transmembrane protein	0.0361905	38
2096448	2097863	-	1415	CDS	Bphy_1835		putative transmembrane protein	0.0423729	60
2097958	2098509	-	551	CDS	Bphy_1836		hypothetical protein	0.0326087	18
2098557	2102525	-	3968	CDS	Bphy_1837		me "signal peptide protein (pseudogene) ,signal peptide protein (pseudogene)"	0.0458554	182
2098557	2102525	-	3968	CDS	Bphy_1837		me "signal peptide protein (pseudogene)"	0.0458554	182
2102515	2105361	-	2846	CDS	Bphy_1839		hypothetical protein	0.0403934	115
2105875	2106690	+	815	CDS	Bphy_1840		AraC family transcriptional regulator	0.0943627	77
2106778	2107428	+	650	CDS	Bphy_1841		lysine exporter protein LysE/YggA	0.0967742	63
2107706	2107867	+	161	CDS	Bphy_1842		hypothetical protein	0.0555556	9
2107947	2108210	-	263	CDS	Bphy_1843		hypothetical protein	0.0492424	13
2108321	2109049	-	728	CDS	Bphy_1844		TetR family transcriptional regulator	0.0836763	61
2109202	2110113	-	911	CDS	Bphy_1845		LysR family transcriptional regulator	0.110746	101
2110210	2111106	+	896	CDS	Bphy_1846		hypothetical protein	0.109253	98
2111195	2111620	+	425	CDS	Bphy_1847		hypothetical protein	0.0399061	17
2111627	2114362	-	2735	CDS	Bphy_1848		2-oxoacid dehydrogenase subunit E1	0.0818713	224
2114425	2115066	+	641	CDS	Bphy_1849		AsnC family transcriptional regulator	0.102804	66
2115098	2116771	-	1673	CDS	Bphy_1850		AMP-dependent synthetase and ligase	0.0848268	142
2116955	2117227	+	272	CDS	Bphy_1851		hypothetical protein	0.0549451	15
2117245	2117616	-	371	CDS	Bphy_1852		hypothetical protein	0.0645161	24
2117767	2118543	+	776	CDS	Bphy_1853		GDSL family lipase	0.0630631	49
2118567	2118872	-	305	CDS	Bphy_1854		hypothetical protein	0.0457516	14
2120192	2120809	+	617	CDS	Bphy_1855		ATP dependent DNA ligase	0.135922	84
2120849	2121064	+	215	CDS	Bphy_1856		YcfA family protein	0.115741	25
2121120	2121536	+	416	CDS	Bphy_1857		hypothetical protein	0.0263789	11
2121909	2122289	-	380	CDS	Bphy_1858		hypothetical protein	0.0367454	14
2122289	2122708	-	419	CDS	Bphy_1859		hypothetical protein	0.12619	53
2122750	2122962	-	212	CDS	Bphy_1860		hypothetical protein	0.14554	31
2123014	2123853	-	839	CDS	Bphy_1861		hypothetical protein	0.217857	183
2123922	2124419	-	497	CDS	Bphy_1862		hypothetical protein	0.156627	78
2124416	2124988	-	572	CDS	Bphy_1863		glycoside hydrolase family protein	0.0924956	53
2124990	2125238	-	248	CDS	Bphy_1864		hypothetical protein	0.160643	40
2125474	2125758	+	284	CDS	Bphy_1865		hypothetical protein	0.112281	32
2125761	2126453	+	692	CDS	Bphy_1866		hypothetical protein	0.124098	86
2126506	2127699	+	1193	CDS	Bphy_1867		acyltransferase-like protein	0.304858	364
2127881	2128753	-	872	CDS	Bphy_1868		hypothetical protein	0.230241	201
2128763	2129356	-	593	CDS	Bphy_1869		hypothetical protein	0.0454545	27
2129365	2130468	-	1103	CDS	Bphy_1870		baseplate J family protein	0.0824275	91
2130468	2131685	-	1217	CDS	Bphy_1871		GP46 family protein	0.0812808	99
2131682	2132281	-	599	CDS	Bphy_1872		phage baseplate assembly protein V	0.0666667	40
2132278	2133369	-	1091	CDS	Bphy_1873		Mu P family protein	0.0641026	70
2133373	2134845	-	1472	CDS	Bphy_1874		DNA circulation family protein	0.0509165	75
2134842	2136644	-	1802	CDS	Bphy_1875		hypothetical protein	0.0615641	111
2136763	2137050	-	287	CDS	Bphy_1876		hypothetical protein	0.0381944	11
2137054	2137425	-	371	CDS	Bphy_1877		hypothetical protein	0.0564516	21
2137487	2138968	-	1481	CDS	Bphy_1878		Mu tail sheath family protein	0.0519568	77
2138971	2139147	-	176	CDS	Bphy_1879		hypothetical protein	0.0960452	17
2139157	2139720	-	563	CDS	Bphy_1880		hypothetical protein	0.0921986	52
2139717	2140049	-	332	CDS	Bphy_1881		hypothetical protein	0.015015	5
2140049	2141086	-	1037	CDS	Bphy_1882		putative phage protein GP20	0.0520231	54
2141150	2141797	-	647	CDS	Bphy_1883		putative phage protein GP19	0.0246914	16
2141832	2142491	-	659	CDS	Bphy_1884		hypothetical protein	0.0318182	21
2142519	2143397	-	878	CDS	Bphy_1885		peptidase S49	0.0705347	62
2143394	2144173	-	779	CDS	Bphy_1886		hypothetical protein	0.121795	95
2144218	2145888	-	1670	CDS	Bphy_1887		lambda family phage portal protein	0.0604428	101
2145888	2146133	-	245	CDS	Bphy_1888		hypothetical protein	0.0691057	17
2146141	2148168	-	2027	CDS	Bphy_1889		terminase GpA	0.0823471	167
2148221	2148814	-	593	CDS	Bphy_1890		hypothetical protein	0.0959596	57
2148983	2149561	-	578	CDS	Bphy_1891		hypothetical protein	0.103627	60
2149563	2149841	-	278	CDS	Bphy_1892		hypothetical protein	0.0501792	14
2150350	2150895	-	545	CDS	Bphy_1893		hypothetical protein	0.272894	149
2151184	2151798	-	614	CDS	Bphy_1894		hypothetical protein	0.0894309	55
2151795	2152049	-	254	CDS	Bphy_1895		hypothetical protein	0.0509804	13
2152046	2152312	-	266	CDS	Bphy_1896		hypothetical protein	0.0898876	24
2152309	2152590	-	281	CDS	Bphy_1897		hypothetical protein	0.0673759	19
2152587	2152847	-	260	CDS	Bphy_1898		hypothetical protein	0.0766284	20
2152898	2153632	-	734	CDS	Bphy_1899		metallophosphoesterase	0.108844	80
2153629	2154078	-	449	CDS	Bphy_1900		hypothetical protein	0.0244444	11
2154075	2154437	-	362	CDS	Bphy_1901		hypothetical protein	0.0440771	16
2154434	2154982	-	548	CDS	Bphy_1902		hypothetical protein	0.0528233	29
2154982	2155512	-	530	CDS	Bphy_1903		hypothetical protein	0.0094162	5
2155509	2155688	-	179	CDS	Bphy_1904		hypothetical protein	0.0111111	2
2155672	2155902	-	230	CDS	Bphy_1905		hypothetical protein	0.038961	9
2155899	2156918	-	1019	CDS	Bphy_1906		GP60	0.077451	79
2156915	2157226	-	311	CDS	Bphy_1907		hypothetical protein	0.0320513	10
2157240	2157476	-	236	CDS	Bphy_1908		hypothetical protein	0.07173	17
2157806	2158201	-	395	CDS	Bphy_1909		hypothetical protein	0.0833333	33
2158306	2158614	-	308	CDS	Bphy_1910		hypothetical protein	0.100324	31
2158679	2159674	+	995	CDS	Bphy_1911		putative phage repressor	0.00200803	2
2160029	2160310	+	281	CDS	Bphy_1912		hypothetical protein	0.156028	44
2160649	2160984	+	335	CDS	Bphy_1913		hypothetical protein	0.0505952	17
2161029	2161859	+	830	CDS	Bphy_1914		hypothetical protein	0.0637786	53
2162051	2162797	+	746	CDS	Bphy_1915		hypothetical protein	0.0896921	67
2162800	2163777	+	977	CDS	Bphy_1916		hypothetical protein	0.0582822	57
2163786	2165393	+	1607	CDS	Bphy_1917		C-5 cytosine-specific DNA methylase	0.0590796	95
2165424	2166110	+	686	CDS	Bphy_1918		hypothetical protein	0.0684134	47
2166112	2166621	+	509	CDS	Bphy_1919		hypothetical protein	0.107843	55
2166618	2167139	+	521	CDS	Bphy_1920		methyltransferase	0.0785441	41
2167136	2167333	+	197	CDS	Bphy_1921		hypothetical protein	0.0606061	12
2167345	2167923	+	578	CDS	Bphy_1922		hypothetical protein	0.0967185	56
2167880	2168242	-	362	CDS	Bphy_1923		hypothetical protein	0.0523416	19
2168320	2169207	+	887	CDS	Bphy_1924		Gp37Gp68 family protein	0.10473	93
2169255	2169596	-	341	CDS	Bphy_1925		hypothetical protein	0.111111	38
2169668	2169889	+	221	CDS	Bphy_1926		hypothetical protein	0.126126	28
2169889	2170941	+	1052	CDS	Bphy_1927		integrase family protein	0.106363	112
2171359	2172348	-	989	CDS	Bphy_1928		hypothetical protein	0.172727	171
2172349	2172711	-	362	CDS	Bphy_1929		hypothetical protein	0.261708	95
2172730	2173419	-	689	CDS	Bphy_1930		hypothetical protein	0.423188	292
2173403	2174776	-	1373	CDS	Bphy_1931		hypothetical protein	0.343523	472
2174817	2177573	-	2756	CDS	Bphy_1932		type VI secretion system Vgr family protein	0.146899	405
2178022	2178348	-	326	CDS	Bphy_1933		hypothetical protein	0.0764526	25
2178361	2178765	-	404	CDS	Bphy_1934		hypothetical protein	0.0839506	34
2178970	2179197	-	227	CDS	Bphy_1935		phage transcriptional regulator AlpA	0.192982	44
2179543	2181561	-	2018	CDS	Bphy_1936		SSS family solute/sodium (Na+) symporter	0.0624071	126
2181558	2181923	-	365	CDS	Bphy_1937		membrane protein	0.0355191	13
2182091	2184073	-	1982	CDS	Bphy_1938		acetyl-CoA synthetase	0.118003	234
2184468	2185367	+	899	CDS	Bphy_1939		hypothetical protein	0.145556	131
2185670	2186245	+	575	CDS	Bphy_1940		hypothetical protein	0.0347222	20
2186303	2187826	+	1523	CDS	Bphy_1941		tartrate/fumarate subfamily Fe-S type hydro-lyase subunit alpha	0.00459318	7
2188000	2188476	+	476	CDS	Bphy_1942		bacterioferritin	0.134172	64
2188575	2189486	+	911	CDS	Bphy_1943		glutamate racemase	0.00877193	8
2189724	2189960	+	236	CDS	Bphy_1944		BFD/(2Fe-2S)-binding domain-containing protein	0.00843882	2
2190208	2190945	+	737	CDS	Bphy_1945		TonB family protein	0.00406504	3
2190984	2191715	+	731	CDS	Bphy_1946		MotA/TolQ/ExbB proton channel	0.00273224	2
2191732	2192151	+	419	CDS	Bphy_1947		biopolymer transport protein ExbD/TolR	0.0166667	7
2192536	2193513	-	977	CDS	Bphy_1948		LysR family transcriptional regulator	0.0787321	77
2193636	2194508	+	872	CDS	Bphy_1949		pirin domain-containing protein	0.112257	98
2194657	2195055	+	398	CDS	Bphy_1950		OsmC family protein	0.107769	43
2195095	2195586	+	491	CDS	Bphy_1951		hypothetical protein	0.142276	70
2195728	2196009	+	281	CDS	Bphy_1952		hypothetical protein	0.070922	20
2196287	2196694	-	407	CDS	Bphy_1953		hypothetical protein	0.0955882	39
2196732	2198141	-	1409	CDS	Bphy_1954		putative nitrogen fixation protein VnfA	0.114894	162
2198138	2198983	-	845	CDS	Bphy_1955		iron permease FTR1	0.0910165	77
2199046	2199381	-	335	CDS	Bphy_1956		hypothetical protein	0.077381	26
2199469	2200017	-	548	CDS	Bphy_1957		hypothetical protein	0.0928962	51
2200365	2202458	-	2093	CDS	Bphy_1958		excinuclease ABC subunit B	0.0725883	152
2202837	2204036	+	1199	CDS	Bphy_1959		aromatic amino acid aminotransferase	0.0783333	94
2204144	2205397	-	1253	CDS	Bphy_1960		patatin	0.106858	134
2205420	2206217	-	797	CDS	Bphy_1961		3-hydroxybutyrate dehydrogenase	0.110276	88
2206435	2207406	+	971	CDS	Bphy_1962		aldo/keto reductase	0.167695	163
2207623	2208468	+	845	CDS	Bphy_1963		hypothetical protein	0.112293	95
2208479	2209513	-	1034	CDS	Bphy_1964		NMT1/THI5-like domain-containing protein	0.154589	160
2209671	2210012	-	341	CDS	Bphy_1965		hypothetical protein	0.119883	41
2210216	2210362	-	146	CDS	Bphy_1966		hypothetical protein	0.136054	20
2210644	2211069	-	425	CDS	Bphy_1967		MerR family transcriptional regulator	0.124413	53
2211202	2211411	+	209	CDS	Bphy_1968		heavy metal transport/detoxification protein	0.142857	30
2211427	2212347	+	920	CDS	Bphy_1969		dTDP-4-dehydrorhamnose reductase	0.130293	120
2212351	2215500	-	3149	CDS	Bphy_1970		DNA polymerase III subunit alpha	0.115873	365
2215505	2216974	-	1469	CDS	Bphy_1971		hypothetical protein	0.0884354	130
2216904	2217611	-	707	CDS	Bphy_1972		hypothetical protein	0.135593	96
2223780	2224928	-	1148	CDS	Bphy_1973		hypothetical protein	0.221932	255
2225120	2226334	+	1214	CDS	Bphy_1974		hypothetical protein	0.123457	150
2226533	2227414	+	881	CDS	Bphy_1975		two component LuxR family transcriptional regulator	0.150794	133
2227508	2228182	+	674	CDS	Bphy_1976		hypothetical protein	0.121481	82
2228399	2229058	+	659	CDS	Bphy_1977		hypothetical protein	0.0469697	31
2229191	2230357	-	1166	CDS	Bphy_1978		peptidase M14 carboxypeptidase A	0.12168	142
2230387	2231169	-	782	CDS	Bphy_1979		hypothetical protein	0.137931	108
2231227	2231742	+	515	CDS	Bphy_1980		hypothetical protein	0.106589	55
2231820	2233010	+	1190	CDS	Bphy_1981		putative aminotransferase	0.130982	156
2233117	2233764	-	647	CDS	Bphy_1982		glutathione S-transferase domain-containing protein	0.0771605	50
2233897	2235477	+	1580	CDS	Bphy_1983		3-hydroxy-acyl-CoA dehydrogenase	0.0765338	121
2235477	2236265	+	788	CDS	Bphy_1984		enoyl-CoA hydratase	0.0671736	53
2236262	2236984	+	722	CDS	Bphy_1985		phosphoglycerate mutase	0.077455	56
2237018	2238124	+	1106	CDS	Bphy_1986		aminoglycoside phosphotransferase	0.0641373	71
2238198	2239436	+	1238	CDS	Bphy_1987		acyl-CoA dehydrogenase domain-containing protein	0.104116	129
2239596	2240297	+	701	CDS	Bphy_1988		glutathione S-transferase domain-containing protein	0.0683761	48
2240336	2240812	-	476	CDS	Bphy_1989		dehydratase	0.0859539	41
2240809	2241267	-	458	CDS	Bphy_1990		dehydratase	0.0588235	27
2241301	2242428	-	1127	CDS	Bphy_1991		acyl-CoA dehydrogenase domain-containing protein	0.072695	82
2242439	2243635	-	1196	CDS	Bphy_1992		acyl-CoA dehydrogenase domain-containing protein	0.0877193	105
2243691	2244134	-	443	CDS	Bphy_1993		hypothetical protein	0.0675676	30
[truncated: 5,952 more rows]
